# Supplementary material for: Ag(i)-catalyzed dearomatizing spirocyclization/nucleophile addition cascade reactions of indole-tethered ynones
Source: Royal Society of Chemistry journal article supplement (doi:10.1039/d3cc03543c), 2023-01-01

## Supporting Information

### Ag(I)-Catalyzed Dearomatizing Spirocyclization/Nucleophile Addition Cascade Reactions of Indole-tethered Yrones

Debojyoti Bag<sup>a,b</sup>, and Sanghapal D. Sawant<sup>a,b\*</sup>

<sup>a</sup>*Natural Products and Medicinal Chemistry Division, CSIR-Indian Institute of Integrative Medicine, Canal Road, Jammu, Jammu & Kashmir, 180001, India.*

<sup>b</sup>*Academy of Scientific and Innovative Research (AcSIR), Ghaziabad-201002, India.*

Correspondence to: [sdsawant@iiim.res.in](mailto:sdsawant@iiim.res.in), [sdsawant@iiim.ac.in](mailto:sdsawant@iiim.ac.in)

#### Table of Contents

| Contents                                                  | Page No. |
|-----------------------------------------------------------|----------|
| 1. General Methods.....                                   | S-2      |
| 2. Synthesis of Starting Materials.....                   | S-3      |
| 3. General Experimental Procedures.....                   | S-4      |
| 4. Characterization data for compounds <b>2a-3c</b> ..... | S-4      |
| 5. Special Notes.....                                     | S-17     |
| 6 X-Ray structures.....                                   | S-18     |
| 7. References.....                                        | S-21     |
| 8. NMR Spectra.....                                       | S-18     |

## 1. General Methods:

**Materials:** All glassware was oven-dried (90 °C). Unless mentioned, chemicals & solvents were purchased in high purity grade from commercial suppliers and used without further purification.

**Chromatography:** Thin layer chromatography (TLC) was carried out on Merck silica plates (60F–254), and components were visualized by observation under UV light or by treating the plates with p-anisaldehyde followed by heating. Silica gel chromatography was performed using silica gel (60–120 or 100–200 mesh).

**Characterization:** NMR spectra for the characterization of compounds were recorded on Bruker Avance DPX FT-NMR 400 MHz instrument ( $^1\text{H}$ ) at 400 MHz and ( $^{13}\text{C}$ ) at 100 MHz respectively.  $^{19}\text{F}$  NMR was recorded at 376 MHz. Chemical shifts ( $\delta$ ) are reported in ppm, using the residual solvent peak in DMSO- $d_6$  ( $\delta_{\text{H}} = 2.50$  and  $\delta_{\text{C}} = 39.52$  ppm),  $\text{CDCl}_3$  ( $\delta_{\text{H}} = 7.26$  and  $\delta_{\text{C}} = 77.16$  ppm),  $\text{CD}_3\text{OD}$  ( $\delta_{\text{H}} = 3.31$  and  $\delta_{\text{C}} = 49.00$  ppm) and as internal reference and coupling constants ( $J$ ) are given in hertz (Hz). The following abbreviations were used to explain the multiplicities: s = singlet, d = doublet, dd = doublet of doublet, ddd = doublet of doublets of doublets, t = triplet, q = quartet, m = multiplet. High-Resolution Mass Spectra (HRMS) were recorded using a Waters XEVO-G2-XS-Q-TOF mass spectrometer.

**Experimental details.** Unless mentioned, reactions were performed in an open atmosphere at room temperature (25–30 °C) in a 5 mL glass vial.

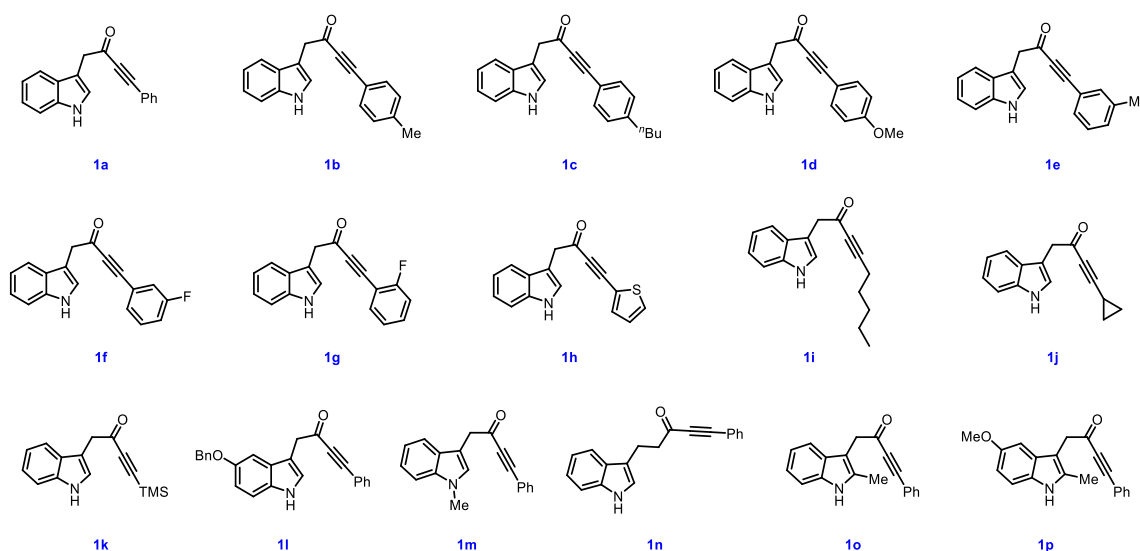

**Figure S1:** Indole-tethered ynones utilized in this study

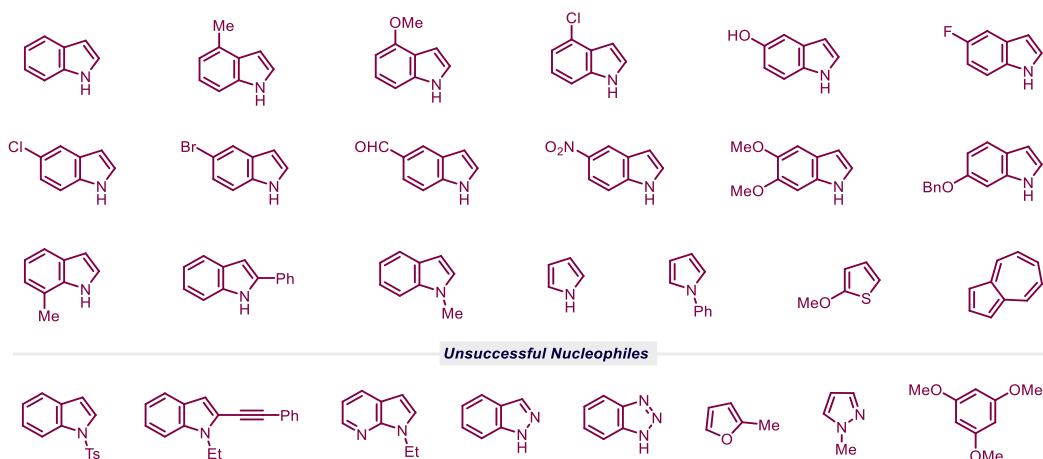

**Figure S2:** C-Nucleophiles utilized in this study

## 2. Synthesis of Starting Materials (Scheme S1):

Indole-tethered ynones utilized in this study were synthesized in two steps according to the previously reported literature procedures.<sup>1,2</sup>

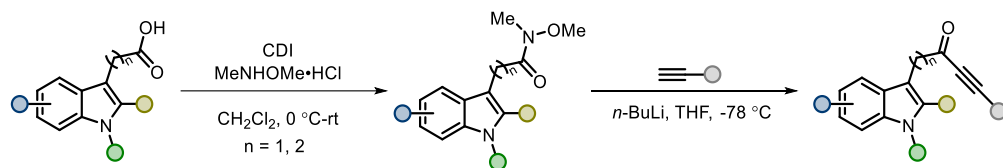

**Scheme S1:** Synthesis of indole-tethered ynones

**General procedure for the synthesis of Weinreb amides:** To a suspension under Ar of carboxylic acids (1.0 equiv.) in  $\text{CH}_2\text{Cl}_2$  was added portion-wise at  $0\text{ }^\circ\text{C}$  CDI (1.2 equiv.) and the resulting mixture was stirred at RT for 2 h. The mixture was then cooled to  $0\text{ }^\circ\text{C}$  and N,O-dimethylhydroxylamine hydrochloride (1.5 equiv.) was added portionwise and the resulting mixture was stirred at RT for additional 12 h. The mixture was diluted with water, extracted with  $\text{CH}_2\text{Cl}_2$  and the aqueous phase was then discarded. The combined organic layers were washed with 1 N HCl and the acidic aqueous phase was extracted with  $\text{CH}_2\text{Cl}_2$ . The combined organic layers were washed with brine, dried over  $\text{Na}_2\text{SO}_4$ , filtered, and concentrated under reduced pressure. Obtained solids were washed with petroleum ether twice which afforded the desired Weinreb amides.

**General procedure for the synthesis of Ynones:** To a solution of terminal alkyne (2.5 equiv.) in THF at  $-78\text{ }^\circ\text{C}$  under argon was added *n*-BuLi (3.0 equiv.). The resulting solution was stirred at  $-78\text{ }^\circ\text{C}$  for 30 min, then transferred via cannula to a cooled ( $-78\text{ }^\circ\text{C}$ ) solution of the corresponding Weinreb amide (1.0 equiv.) in THF. The mixture was stirred at  $-78\text{ }^\circ\text{C}$  for 5 min then warmed to  $-10\text{ }^\circ\text{C}$  and stirred for a further 1 h. The reaction was then re-cooled to

-78 °C and quenched with sat. aq. NH<sub>4</sub>Cl, allowed to warm to room temperature, diluted with water, extracted with ethyl acetate, dried over Na<sub>2</sub>SO<sub>4</sub> and concentrated in vacuo. Purification by flash column chromatography afforded the desired ynones as well as recovered alkyne.

### 3. General Experimental Procedure:

#### Procedure for the Synthesis of Spiroindolines from Indole-tethered Ynones (GP1):

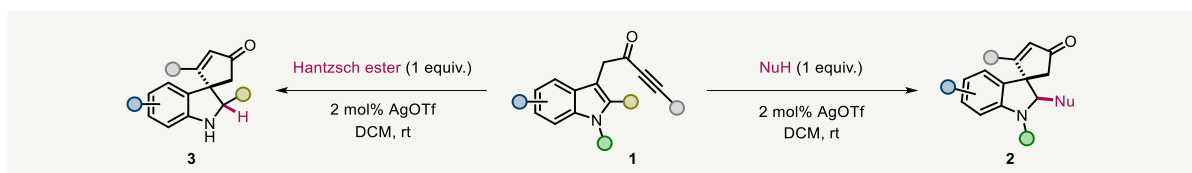

To the solution of indole-tethered ynone **1** (1.0 equiv.) and indole (or other hetero- and carbocycles/ Hantzsch ester) (1.0 equiv.) in DCM (0.15 M) was added AgOTf (2.0 mol %). The resulting mixture was stirred at room temperature. Progress of the reaction was monitored periodically by TLC. Upon completion, water was added to the reaction mixture. The organic layer was extracted with DCM. The combined organic layers were dried over anhydrous Na<sub>2</sub>SO<sub>4</sub> and concentrated under reduced pressure. Silica gel column purification by using ethyl acetate and petroleum ether mixture as eluent afforded the desired products.

### 4. Characterization Data of Synthesized Compounds:

**2'-(1*H*-indol-3-yl)-2-phenylspiro[cyclopentane-1,3'-indolin]-2-en-4-one (2a):** Reaction of

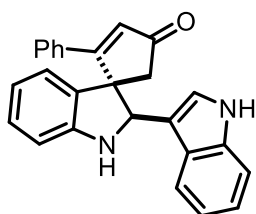

ynone **1a** (50 mg, 0.192 mmol), indole (23 mg, 0.192 mmol) and AgOTf (1 mg, 0.003 mmol) following the GP1 afforded the title compound **2a** as pale brown solid (71 mg, 98% yield); *R<sub>f</sub>*: 0.5 (40% Ethyl Acetate-Petroleum Ether); <sup>1</sup>H NMR (400 MHz, DMSO-*d*<sub>6</sub>) δ 11.06 (s, 1H), 7.77-7.55 (m, 2H), 7.53-7.38 (m, 3H), 7.37-7.29 (m, 1H), 7.26 (s, 1H), 7.15-6.96 (m, 3H), 6.93-6.86 (m, 1H), 6.85-6.71 (m, 2H), 6.69-6.62 (m, 2H), 6.31 (d, *J* = 2.01 Hz, 1H), 5.57 (d, *J* = 2.07 Hz, 1H), 2.80 (d, *J* = 18.44 Hz, 1H), 2.04 (d, *J* = 18.44 Hz, 1H) ppm; <sup>13</sup>C{<sup>1</sup>H} NMR (100 MHz, DMSO-*d*<sub>6</sub>) δ 206.5, 175.1, 150.9, 136.8, 134.0, 133.7, 131.1, 130.8, 129.5, 129.3, 128.9, 126.7, 124.7, 123.0, 121.7, 119.3, 119.1, 118.9, 112.9, 112.2, 109.7, 63.9, 60.6, 49.0 ppm; HRMS (ESI): calcd. for C<sub>26</sub>H<sub>21</sub>N<sub>2</sub>O [M+H]<sup>+</sup>: 377.1654, found 377.1656.

**2'-(4-methyl-1*H*-indol-3-yl)-2-phenylspiro[cyclopentane-1,3'-indolin]-2-en-4-one (2b):**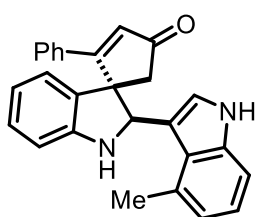

Reaction of ynone **1a** (50 mg, 0.192 mmol), 4-methylindole (25.3 mg, 0.192 mmol) and AgOTf (1 mg, 0.003 mmol) following the GP1 afforded the title compound **2b** as yellow solid (74 mg, 98% yield);  $R_f$ : 0.55 (40% Ethyl Acetate-Petroleum Ether);  $^1\text{H}$  NMR (400 MHz, DMSO- $d_6$ )  $\delta$  11.17 (s, 1H), 7.58-7.52 (m, 2H), 7.44-7.34 (m, 3H), 7.29-7.25 (m, 1H), 7.22-7.18 (m, 1H), 7.10-7.05 (m, 1H), 6.95-6.90 (m, 1H), 6.85-6.80 (m, 1H), 6.69-6.62 (m, 3H), 6.60-6.54 (m, 1H), 6.40 (s, 1H), 5.77 (s, 1H), 2.71 (d,  $J = 18.54$  Hz, 1H), 2.18 (d,  $J = 18.52$  Hz, 1H), 2.12 (s, 3H) ppm;  $^{13}\text{C}\{^1\text{H}\}$  NMR (100 MHz, DMSO- $d_6$ )  $\delta$  206.0, 176.4, 150.9, 136.9, 133.7, 132.1, 130.5, 129.0, 128.9, 128.8, 128.6, 125.2, 125.1, 123.2, 121.2, 121.0, 117.6, 115.2, 109.9, 108.0, 62.7, 61.0, 49.8, 20.8 ppm; HRMS (ESI): calcd. for  $\text{C}_{27}\text{H}_{23}\text{N}_2\text{O}$   $[\text{M}+\text{H}]^+$ : 391.1810, found 391.1815.

**2'-(4-methoxy-1*H*-indol-3-yl)-2-phenylspiro[cyclopentane-1,3'-indolin]-2-en-4-one (2c):**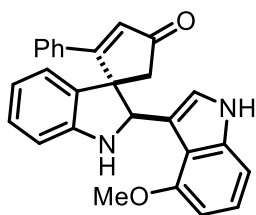

Reaction of ynone **1a** (50 mg, 0.192 mmol), 4-methoxyindole (28.4 mg, 0.192 mmol) and AgOTf (1 mg, 0.003 mmol) following the GP1 afforded the title compound **2c** as yellow solid (69 mg, 88% yield);  $R_f$ : 0.45 (40% Ethyl Acetate-Petroleum Ether);  $^1\text{H}$  NMR (400 MHz, DMSO- $d_6$ )  $\delta$  11.09 (s, 1H), 7.71-7.61 (m, 2H), 7.44-7.33 (m, 3H), 7.26 (s, 1H), 7.06-7.00 (m, 1H), 6.95-6.88 (m, 2H), 6.77-6.64 (m, 2H), 6.60 (s, 1H), 6.57-6.50 (m, 1H), 6.32-6.22 (m, 2H), 5.99 (s, 1H), 3.13 (s, 3H), 2.81 (d,  $J = 18.26$  Hz, 1H), 2.06 (d,  $J = 18.22$  Hz, 1H) ppm;  $^{13}\text{C}\{^1\text{H}\}$  NMR (100 MHz, DMSO- $d_6$ )  $\delta$  206.0, 175.7, 153.6, 151.0, 137.9, 133.8, 133.1, 130.1, 128.8, 128.5, 128.4, 128.3, 123.1, 122.1, 117.6, 116.4, 114.1, 108.3, 105.0, 98.9, 63.0, 60.3, 54.0, 49.3 ppm; HRMS (ESI): calcd. for  $\text{C}_{27}\text{H}_{23}\text{N}_2\text{O}_2$   $[\text{M}+\text{H}]^+$ : 407.1760, found 407.1757.

**2'-(5-hydroxy-1*H*-indol-3-yl)-2-phenylspiro[cyclopentane-1,3'-indolin]-2-en-4-one (2e):**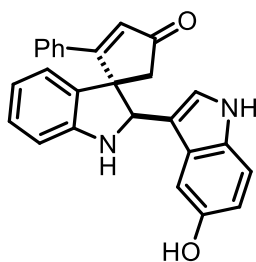

Reaction of ynone **1a** (50 mg, 0.192 mmol), 5-hydroxyindole (25.7 mg, 0.192 mmol) and AgOTf (1 mg, 0.003 mmol) following the GP1 afforded the title compound **2e** as yellow solid (73.2 mg, 97% yield);  $R_f$ : 0.2 (40% Ethyl Acetate-Petroleum Ether);  $^1\text{H}$  NMR (400 MHz, DMSO- $d_6$ )  $\delta$  10.76 (s, 1H), 8.60 (s, 1H), 7.66-7.60 (m, 2H), 7.48-7.38 (m, 3H), 7.15-7.03 (m, 3H), 6.92-6.86 (m, 1H), 6.74-6.67 (m, 2H), 6.66-6.55 (m, 3H), 6.32 (s, 1H), 5.44 (s, 1H), 2.83 (d,  $J = 18.41$  Hz, 1H), 2.05 (d,  $J = 18.36$  Hz, 1H) ppm;  $^{13}\text{C}\{^1\text{H}\}$  NMR (100 MHz,

DMSO- $d_6$ )  $\delta$  206.0, 174.8, 150.8, 150.3, 133.6, 131.2, 130.5, 130.4, 129.2, 128.9, 128.6, 127.3, 124.6, 122.9, 118.1, 112.0, 111.8, 111.7, 109.1, 103.7, 63.9, 60.5, 49.0 ppm; HRMS (ESI): calcd. for  $C_{26}H_{21}N_2O_2$   $[M+H]^+$ : 393.1603, found 393.1607.

**2'-(5-fluoro-1*H*-indol-3-yl)-2-phenylspiro[cyclopentane-1,3'-indolin]-2-en-4-one (2f):**

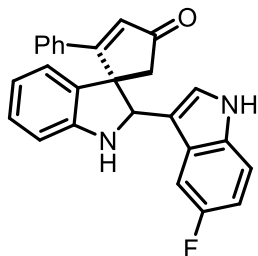

Reaction of ynone **1a** (50 mg, 0.192 mmol), 5-fluoroindole (26 mg, 0.192 mmol) and AgOTf (1 mg, 0.003 mmol) following the GP1 afforded the title compound **2f** as brown solid (73.5 mg, 97% yield);  $R_f$ : 0.34 (40% Ethyl Acetate-Petroleum Ether);  $^1H$  NMR (400 MHz, DMSO- $d_6$ )  $\delta$  11.22 (s, 1H), 7.72-7.61 (m, 2H), 7.52-7.41 (m, 3H), 7.38-7.29 (m, 2H), 7.15-7.08 (m, 1H), 6.97-6.82 (m, 2H), 6.80-6.61 (m, 4H), 6.37 (s, 1H), 5.50 (s, 1H), 2.77 (d,  $J = 18.38$  Hz, 1H), 2.06 (d,  $J = 18.36$  Hz, 1H) ppm;  $^{13}C\{^1H\}$  NMR (100 MHz, DMSO- $d_6$ )  $\delta$  205.6, 174.1, 156.5 (d,  $J = 231.58$  Hz), 150.6, 133.7, 133.2 (d,  $J = 22.24$  Hz), 130.7, 130.6, 129.0 (d,  $J = 30.54$  Hz), 128.5, 126.6, 126.5, 122.7, 118.5, 112.8 (d,  $J = 9.89$  Hz), 112.6 (d,  $J = 4.58$  Hz), 109.6, 109.3, 103.5 (d,  $J = 23.59$  Hz), 63.5, 60.2, 48.5 ppm;  $^{19}F$  NMR (376 MHz, DMSO- $d_6$ )  $\delta$  -124.8 ppm; HRMS (ESI): calcd. for  $C_{26}H_{20}N_2OF$   $[M+H]^+$ : 395.1560, found 395.1553.

**2'-(5-chloro-1*H*-indol-3-yl)-2-phenylspiro[cyclopentane-1,3'-indolin]-2-en-4-one (2g):**

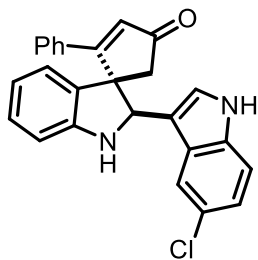

Reaction of ynone **1a** (50 mg, 0.192 mmol), 5-chloroindole (29.2 mg, 0.192 mmol) and AgOTf (1 mg, 0.003 mmol) following the GP1 afforded the title compound **2g** as pale brown solid (74.3 mg, 94% yield);  $R_f$ : 0.32 (40% Ethyl Acetate-Petroleum Ether);  $^1H$  NMR (400 MHz, DMSO- $d_6$ )  $\delta$  11.32 (s, 1H), 7.69-7.62 (m, 2H), 7.50-7.42 (m, 3H), 7.38-7.34 (m, 2H), 7.15-7.10 (m, 1H), 7.06-7.00 (m, 2H), 6.96-6.92 (m, 1H), 6.79-6.75 (m, 1H), 6.73 (s, 1H), 6.68 (t,  $J = 7.37$  Hz, 1H), 6.39 (d,  $J = 2.44$  Hz, 1H), 5.51 (d,  $J = 2.40$  Hz, 1H), 2.77 (d,  $J = 18.44$  Hz, 1H), 2.05 (d,  $J = 18.42$  Hz, 1H) ppm;  $^{13}C\{^1H\}$  NMR (100 MHz, DMSO- $d_6$ )  $\delta$  205.6, 174.0, 150.6, 134.9, 133.8, 133.4, 130.9, 130.8, 129.3, 129.0, 128.6, 127.6, 126.2, 123.4, 122.8, 121.3, 118.7, 118.3, 113.4, 112.1, 109.5, 63.6, 60.3, 48.5 ppm; HRMS (ESI): calcd. for  $C_{26}H_{20}N_2OCl$   $[M+H]^+$ : 411.1264, found 411.1265.

**2'-(5-bromo-1*H*-indol-3-yl)-2-phenylspiro[cyclopentane-1,3'-indolin]-2-en-4-one (2h):**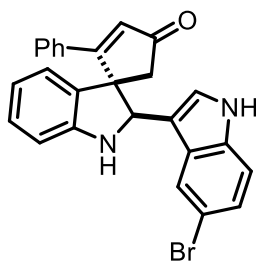

Reaction of ynone **1a** (50 mg, 0.192 mmol), 5-bromoindole (37.8 mg, 0.192 mmol) and AgOTf (1 mg, 0.003 mmol) following the GP1 afforded the title compound **2h** as yellow solid (84 mg, 96% yield);  $R_f$ : 0.29 (40% Ethyl Acetate-Petroleum Ether);  $^1\text{H}$  NMR (400 MHz, DMSO- $d_6$ )  $\delta$  11.32 (s, 1H), 7.69-7.62 (m, 2H), 7.52-7.43 (m, 3H), 7.35-7.29 (m, 2H), 7.18-7.10 (m, 3H), 6.97-6.91 (m, 1H), 6.78-6.74 (m, 1H), 6.72 (s, 1H), 6.69 (t,  $J = 7.37$  Hz, 1H), 6.38 (d,  $J = 2.71$  Hz, 1H), 5.50 (d,  $J = 2.82$  Hz, 1H), 2.76 (d,  $J = 18.47$  Hz, 1H), 2.04 (d,  $J = 18.42$  Hz, 1H) ppm;  $^{13}\text{C}\{^1\text{H}\}$  NMR (100 MHz, DMSO- $d_6$ )  $\delta$  205.6, 174.0, 150.5, 135.1, 133.8, 133.4, 131.0, 130.8, 129.3, 129.0, 128.6, 128.2, 126.1, 123.8, 122.8, 121.3, 118.7, 113.9, 112.0, 111.3, 109.6, 63.5, 60.3, 48.4 ppm; HRMS (ESI): calcd. for  $\text{C}_{26}\text{H}_{20}\text{N}_2\text{OBr}$   $[\text{M}+\text{H}]^+$ : 455.0759, found 455.0751.

**3-(4-oxo-2-phenylspiro[cyclopentane-1,3'-indolin]-2-en-2'-yl)-1*H*-indole-5-carbaldehyde (2i):**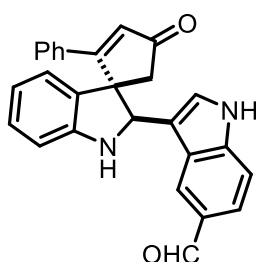

Reaction of ynone **1a** (50 mg, 0.192 mmol), indole-5-carboxaldehyde (28 mg, 0.192 mmol) and AgOTf (1 mg, 0.003 mmol) following the GP1 afforded the title compound **2i** as yellow solid (61.5 mg, 79% yield);  $R_f$ : 0.20 (40% Ethyl Acetate-Petroleum Ether);  $^1\text{H}$  NMR (400 MHz, DMSO- $d_6$ )  $\delta$  11.64 (d,  $J = 1.72$  Hz, 1H), 9.73 (s, 1H), 7.73-7.65 (m, 2H), 7.63 (s, 1H), 7.61-7.51 (m, 1H), 7.51-7.45 (m, 4H), 7.44 (d,  $J = 2.14$  Hz, 1H), 7.14 (ddd,  $J = 15.23, 7.70, 1.22$  Hz, 1H), 6.98-6.94 (m, 1H), 6.80-6.76 (m, 1H), 6.73-6.67 (m, 2H), 6.44 (d,  $J = 3.22$  Hz, 1H), 5.61 (d,  $J = 2.97$  Hz, 1H), 2.76 (d,  $J = 18.44$  Hz, 1H), 2.06 (d,  $J = 18.45$  Hz, 1H) ppm;  $^{13}\text{C}\{^1\text{H}\}$  NMR (100 MHz, DMSO- $d_6$ )  $\delta$  205.5, 192.1, 173.9, 150.5, 139.9, 133.8, 133.4, 131.1, 130.8, 129.4, 129.0, 128.6, 128.5, 126.6, 126.3, 124.6, 122.8, 121.4, 118.8, 114.5, 112.6, 109.6, 63.5, 60.3, 48.5 ppm; HRMS (ESI): calcd. for  $\text{C}_{27}\text{H}_{21}\text{N}_2\text{O}_2$   $[\text{M}+\text{H}]^+$ : 405.1603, found 405.1597.

**2'-(5-nitro-1*H*-indol-3-yl)-2-phenylspiro[cyclopentane-1,3'-indolin]-2-en-4-one (2j):**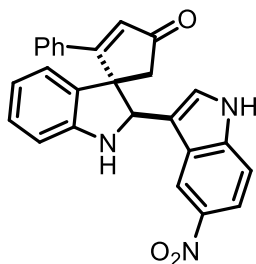

Reaction of ynone **1a** (50 mg, 0.192 mmol), 5-nitroindole (31.3 mg, 0.192 mmol) and AgOTf (1 mg, 0.003 mmol) following the GP1 afforded the title compound **2j** as yellow solid (60 mg, 74% yield);  $R_f$ : 0.21 (40% Ethyl Acetate-Petroleum Ether);  $^1\text{H}$  NMR (400 MHz, DMSO- $d_6$ )  $\delta$  11.87 (s, 1H), 8.08-8.04 (m, 1H), 7.95 (dd,  $J = 9.01, 2.18$  Hz, 1H), 7.72-7.66 (m, 2H), 7.57 (d,  $J = 1.97$  Hz, 1H), 7.54-7.44 (m, 4H), 7.15 (t,  $J = 7.58$  Hz,

1H), 6.97 (d,  $J = 7.34$  Hz, 1H), 6.79 (d,  $J = 7.81$  Hz, 1H), 6.74 (s, 1H), 6.71 (t,  $J = 7.34$  Hz, 1H), 6.47 (d,  $J = 3.26$  Hz, 1H), 5.58 (d,  $J = 3.11$  Hz, 1H), 2.71 (d,  $J = 18.43$  Hz, 1H), 2.07 (d,  $J = 18.446$  Hz, 1H) ppm;  $^{13}\text{C}\{^1\text{H}\}$  NMR (100 MHz, DMSO- $d_6$ )  $\delta$  205.2, 173.7, 150.4, 140.4, 139.6, 133.7, 133.2, 131.0, 130.7, 129.3, 129.0, 128.6, 128.3, 125.5, 122.8, 118.9, 116.7, 116.2, 115.2, 112.3, 109.7, 63.3, 60.2, 48.4 ppm; HRMS (ESI): calcd. for  $\text{C}_{26}\text{H}_{20}\text{N}_3\text{O}_3$   $[\text{M}+\text{H}]^+$ : 422.1505, found 422.1503.

### 2'-(6-(benzyloxy)-1H-indol-3-yl)-2-phenylspiro[cyclopentane-1,3'-indolin]-2-en-4-one

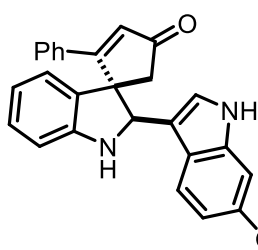

**(2k):** Reaction of ynone **1a** (50 mg, 0.192 mmol), 6-benzyloxyindole (43 mg, 0.192 mmol) and AgOTf (1 mg, 0.003 mmol) following the GP1 afforded the title compound **2k** as brown solid (86.5 mg, 93% yield);  $R_f$ : 0.42 (40% Ethyl Acetate-Petroleum Ether);  $^1\text{H}$  NMR (400 MHz, DMSO- $d_6$ )  $\delta$  10.89 (s, 1H), 7.68-7.61 (m, 2H), 7.48-7.28 (m, 8H), 7.14-7.07 (m, 2H), 6.96-6.88 (m, 3H), 6.75-6.71 (m, 1H), 6.70-6.62 (m, 2H), 6.60-6.55 (m, 1H), 6.34 (s, 1H), 5.51 (s, 1H), 5.05 (s, 2H), 2.81 (d,  $J = 18.48$  Hz, 1H), 2.04 (d,  $J = 18.42$  Hz, 1H) ppm;  $^{13}\text{C}\{^1\text{H}\}$  NMR (100 MHz, DMSO- $d_6$ )  $\delta$  205.9, 174.5, 154.6, 150.7, 137.6, 137.2, 133.7, 133.5, 130.6, 130.6, 129.2, 128.9, 128.5, 127.8, 127.7, 123.1, 122.8, 121.0, 119.8, 118.4, 112.7, 109.5, 109.2, 96.1, 69.6, 63.7, 60.3, 48.8 ppm; HRMS (ESI): calcd. for  $\text{C}_{33}\text{H}_{27}\text{N}_2\text{O}_2$   $[\text{M}+\text{H}]^+$ : 483.2073, found 483.2071.

### 2'-(5,6-dimethoxy-1H-indol-3-yl)-2-phenylspiro[cyclopentane-1,3'-indolin]-2-en-4-one

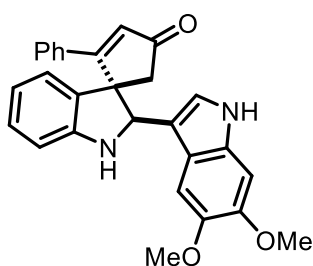

**(2l):** Reaction of ynone **1a** (50 mg, 0.192 mmol), 5,6-dimethoxyindole (34.2 mg, 0.192 mmol) and AgOTf (1 mg, 0.003 mmol) following the GP1 afforded the title compound **2l** as brown solid (79 mg, 94% yield);  $R_f$ : 0.18 (40% Ethyl Acetate-Petroleum Ether);  $^1\text{H}$  NMR (400 MHz, DMSO- $d_6$ )  $\delta$  10.77 (s, 1H), 7.75-7.68 (m, 2H), 7.48-7.40 (m, 3H), 7.18-7.07 (m, 2H), 6.92-6.85 (m, 2H), 6.76-6.72 (m, 2H), 6.68-6.62 (m, 1H), 6.31-6.29 (m, 2H), 5.57 (d,  $J = 2.67$  Hz, 1H), 3.71 (s, 3H), 3.43 (s, 3H), 2.88 (d,  $J = 18.48$  Hz, 1H), 2.03 (d,  $J = 18.46$  Hz, 1H) ppm;  $^{13}\text{C}\{^1\text{H}\}$  NMR (100 MHz, DMSO- $d_6$ )  $\delta$  205.8, 174.1, 150.7, 146.3, 144.0, 134.0, 133.3, 130.8, 130.6, 129.3, 128.8, 128.4, 122.6, 119, 118.4, 112.6, 109.2, 101.0, 95.2, 63.6, 60.0, 55.6, 55.6, 48.5 ppm; HRMS (ESI): calcd. for  $\text{C}_{28}\text{H}_{25}\text{N}_2\text{O}_3$   $[\text{M}+\text{H}]^+$ : 437.1865, found 437.1870.



**2'-(7-methyl-1*H*-indol-3-yl)-2-phenylspiro[cyclopentane-1,3'-indolin]-2-en-4-one (2m):**

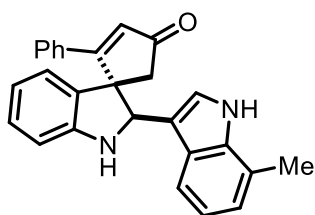

Reaction of ynone **1a** (50 mg, 0.192 mmol), 7-methylindole (25.3 mg, 0.192 mmol) and AgOTf (1 mg, 0.003 mmol) following the GP1 afforded the title compound **2m** as brown solid (73 mg, 97% yield);  $R_f$ : 0.51 (40% Ethyl Acetate-Petroleum Ether);  $^1\text{H}$  NMR (400 MHz, DMSO- $d_6$ )  $\delta$  11.07 (s, 1H), 7.68-7.64 (m, 2H), 7.49-7.41 (m, 3H), 7.26 (d,  $J = 2.28$  Hz, 1H), 7.14-7.08 (m, 1H), 6.90 (d,  $J = 7.08$  Hz, 1H), 6.85-6.81 (m, 2H), 6.75-6.70 (m, 2H), 6.68 (s, 1H), 6.66-6.63 (m, 1H), 6.35 (d,  $J = 2.68$  Hz, 1H), 5.57 (d,  $J = 2.59$  Hz, 1H), 2.82 (d,  $J = 18.46$  Hz, 1H), 2.41 (s, 3H), 2.04 (d,  $J = 18.48$  Hz, 1H) ppm;  $^{13}\text{C}\{^1\text{H}\}$  NMR (100 MHz, DMSO- $d_6$ )  $\delta$  206.3, 175.0, 151.0, 136.4, 134.2, 133.9, 131.0, 130.9, 129.6, 129.3, 128.9, 126.4, 124.4, 123.1, 122.2, 121.2, 119.3, 118.7, 117.1, 113.6, 109.6, 64.0, 60.6, 49.1, 17.2 ppm; HRMS (ESI): calcd. for  $\text{C}_{27}\text{H}_{23}\text{N}_2\text{O}$   $[\text{M}+\text{H}]^+$ : 391.1810, found 391.1814.

**2-phenyl-2'-(2-phenyl-1*H*-indol-3-yl)spiro[cyclopentane-1,3'-indolin]-2-en-4-one (2n):**

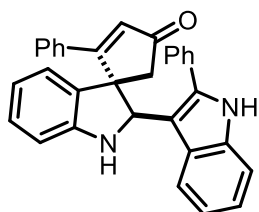

Reaction of ynone **1a** (50 mg, 0.192 mmol), 2-phenylindole (37.3 mg, 0.192 mmol) and AgOTf (1 mg, 0.003 mmol) following the GP1 afforded the title compound **2n** as yellow solid (84 mg, 96% yield);  $R_f$ : 0.63 (40% Ethyl Acetate-Petroleum Ether);  $^1\text{H}$  NMR (400 MHz, DMSO- $d_6$ )  $\delta$  11.38 (s, 1H), 7.42-7.32 (m, 5H), 7.31-7.21 (m, 8H), 7.14-7.09 (m, 2H), 6.96-6.88 (m, 2H), 6.65-6.58 (m, 3H), 6.39 (s, 1H), 5.27 (s, 1H), 2.85 (d,  $J = 18.52$  Hz, 1H), 2.37 (d,  $J = 18.54$  Hz, 1H) ppm;  $^{13}\text{C}\{^1\text{H}\}$  NMR (100 MHz, DMSO- $d_6$ )  $\delta$  206.1, 176.6, 151.0, 137.1, 136.4, 133.5, 132.3, 131.8, 130.2, 129.1, 129.0, 128.8, 128.6, 128.5, 128.4, 127.9, 127.4, 122.7, 121.7, 121.0, 119.2, 117.3, 111.6, 110.7, 107.8, 61.8, 60.6, 50.6 ppm; HRMS (ESI): calcd. for  $\text{C}_{32}\text{H}_{25}\text{N}_2\text{O}$   $[\text{M}+\text{H}]^+$ : 453.1967, found 453.1965.

**2'-(1-methyl-1*H*-indol-3-yl)-2-phenylspiro[cyclopentane-1,3'-indolin]-2-en-4-one (2o):**

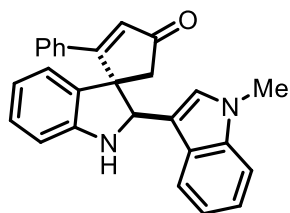

Reaction of ynone **1a** (50 mg, 0.192 mmol), 1-methylindole (25.3 mg, 0.192 mmol) and AgOTf (1 mg, 0.003 mmol) following the GP1 afforded the title compound **2o** as yellow solid (68.5 mg, 91% yield);  $R_f$ : 0.54 (40% Ethyl Acetate-Petroleum Ether);  $^1\text{H}$  NMR (400 MHz, DMSO- $d_6$ )  $\delta$  7.69-7.62 (m, 2H), 7.50-7.42 (m, 3H), 7.39-7.35 (m, 1H), 7.30 (s, 1H), 7.14-7.06 (m, 2H), 7.03-6.98 (m, 1H), 6.93-6.81 (m, 2H), 6.76-6.63 (m, 3H),

6.35 (d,  $J = 2.46$  Hz, 1H), 5.57 (d,  $J = 2.47$  Hz, 1H), 3.74 (s, 3H), 2.82 (d,  $J = 18.48$  Hz, 1H), 2.05 (d,  $J = 18.43$  Hz, 1H) ppm;  $^{13}\text{C}\{^1\text{H}\}$  NMR (100 MHz, DMSO- $d_6$ )  $\delta$  205.9, 174.5, 150.6, 137.0, 133.8, 133.5, 130.64, 130.60, 129.2, 128.9, 128.8, 128.6, 126.7, 122.7, 121.4, 119.2, 118.8, 118.4, 111.9, 110.1, 109.2, 63.4, 60.2, 48.8, 32.6 ppm; HRMS (ESI): calcd. for  $\text{C}_{27}\text{H}_{23}\text{N}_2\text{O}$   $[\text{M}+\text{H}]^+$ : 391.1810, found 391.1812.

**2'-(1*H*-indol-3-yl)-2-(*p*-tolyl)spiro[cyclopentane-1,3'-indolin]-2-en-4-one (2p):** Reaction of

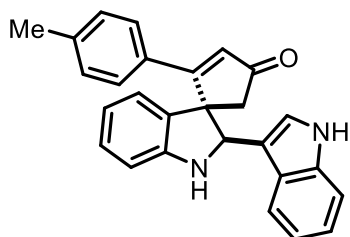

ynone **1b** (65 mg, 0.237 mmol), indole (43 mg, 0.237 mmol) and AgOTf (1.2 mg, 0.004 mmol) following the GP1 afforded the title compound **2p** as brown solid (91 mg, 98% yield);  $R_f$ : 0.45 (40% Ethyl Acetate-Petroleum Ether);  $^1\text{H}$  NMR (400 MHz, DMSO- $d_6$ )  $\delta$  11.09 (d,  $J = 1.96$  Hz, 1H), 7.61-7.56 (m, 2H), 7.36-7.31 (m, 1H), 7.29-7.23 (m, 3H), 7.10 (ddd,  $J = 15.26, 7.65, 1.25$  Hz, 1H), 7.06-7.00 (m, 2H), 6.88 (d,  $J = 6.90$  Hz, 1H), 6.81 (ddd,  $J = 15.05, 7.52, 0.90$  Hz, 1H), 6.73 (d,  $J = 7.61$  Hz, 1H), 6.65 (s, 1H), 6.64 (ddd,  $J = 14.81, 7.38, 0.95$  Hz, 1H), 6.36 (d,  $J = 2.92$  Hz, 1H), 5.60 (d,  $J = 2.73$  Hz, 1H), 2.81 (d,  $J = 18.39$  Hz, 1H), 2.33 (s, 3H), 2.02 (d,  $J = 18.34$  Hz, 1H) ppm;  $^{13}\text{C}\{^1\text{H}\}$  NMR (100 MHz, DMSO- $d_6$ )  $\delta$  205.6, 174.4, 150.6, 140.6, 136.5, 133.9, 130.6, 129.7, 129.4, 129.2, 128.4, 126.4, 124.3, 122.6, 121.2, 119.1, 118.6, 118.2, 112.7, 111.7, 109.1, 63.7, 60.1, 48.7, 21.0 ppm; HRMS (ESI): calcd. for  $\text{C}_{27}\text{H}_{23}\text{N}_2\text{O}$   $[\text{M}+\text{H}]^+$ : 391.1810, found 391.1812.

**2-(4-butylphenyl)-2'-(1*H*-indol-3-yl)spiro[cyclopentane-1,3'-indolin]-2-en-4-one (2q):**

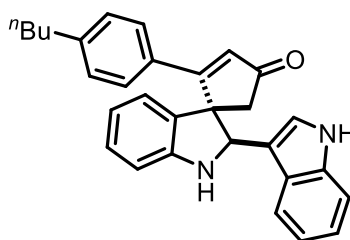

Reaction of ynone **1c** (89 mg, 0.282 mmol), indole (33 mg, 0.282 mmol) and AgOTf (1.4 mg, 0.005 mmol) following the GP1 afforded the title compound **2q** as pale brown solid (110 mg, 90% yield);  $R_f$ : 0.50 (40% Ethyl Acetate-Petroleum Ether);  $^1\text{H}$  NMR (400 MHz, DMSO- $d_6$ )  $\delta$  11.08 (d,  $J = 2.05$  Hz, 1H), 7.61-7.56 (m, 2H), 7.36-7.32 (m, 1H), 7.29-7.23 (m, 3H), 7.10 (ddd,  $J = 15.24, 7.65, 1.22$  Hz, 1H), 7.05-7.00 (m, 2H), 6.91-6.87 (m, 1H), 6.81 (ddd,  $J = 14.98, 6.92, 0.96$  Hz, 1H), 6.73 (d,  $J = 7.65$  Hz, 1H), 6.65 (s, 1H), 6.64 (ddd,  $J = 14.64, 7.23, 0.98$  Hz, 1H), 6.36 (d,  $J = 2.91$  Hz, 1H), 5.59 (d,  $J = 2.72$  Hz, 1H), 2.81 (d,  $J = 18.41$  Hz, 1H), 2.60 (t,  $J = 7.61$  Hz, 2H), 2.03 (d,  $J = 18.41$  Hz, 1H), 1.60-1.51 (m, 2H), 1.34-1.23 (m, 2H), 0.87 (t,  $J = 7.39$  Hz, 3H) ppm;  $^{13}\text{C}\{^1\text{H}\}$  NMR (100 MHz, DMSO- $d_6$ )  $\delta$  205.7, 174.5, 150.6, 145.4, 136.5, 134.0, 130.8, 129.7, 129.2, 128.8, 128.4, 126.4, 124.3, 122.6, 121.2, 119.1, 118.6, 118.3, 112.7, 111.7, 109.1, 63.7, 60.1,

48.7, 34.6, 32.7, 21.8, 13.8 ppm; HRMS (ESI): calcd. for C<sub>30</sub>H<sub>29</sub>N<sub>2</sub>O [M+H]<sup>+</sup>: 433.2280, found 433.2271.

**2'-(1*H*-indol-3-yl)-2-(4-methoxyphenyl)spiro[cyclopentane-1,3'-indolin]-2-en-4-one (2r):**

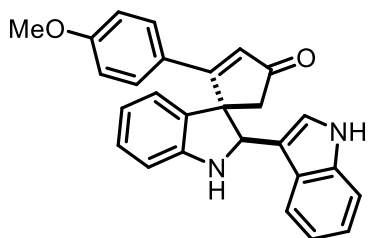

Reaction of ynone **1d** (55 mg, 0.190 mmol), indole (22.3 mg, 0.190 mmol) and AgOTf (1 mg, 0.003 mmol) following the GP1 afforded the title compound **2r** as brown solid (74 mg, 96% yield); *R<sub>f</sub>*: 0.2 (40% Ethyl Acetate-Petroleum Ether); <sup>1</sup>H NMR (400 MHz, DMSO-*d*<sub>6</sub>) δ 11.08 (d, *J* = 2.03 Hz, 1H), 7.70-7.65 (m, 2H), 7.35-7.31 (m, 1H), 7.30-7.27 (m, 1H), 7.10 (ddd, *J* = 15.36, 7.66, 1.24 Hz, 1H), 7.05-6.99 (m, 4H), 6.87 (d, *J* = 6.92 Hz, 1H), 6.81 (ddd, *J* = 15.02, 7.55, 0.89 Hz, 1H), 6.73 (d, *J* = 7.64 Hz, 1H), 6.64 (ddd, *J* = 14.80, 7.44, 0.92 Hz, 1H), 6.61 (s, 1H), 6.37 (d, *J* = 2.90 Hz, 1H), 5.61 (d, *J* = 2.73 Hz, 1H), 3.79 (s, 3H), 2.81 (d, *J* = 18.38 Hz, 1H), 2.00 (d, *J* = 18.33 Hz, 1H) ppm; <sup>13</sup>C{<sup>1</sup>H} NMR (100 MHz, DMSO-*d*<sub>6</sub>) δ 205.3, 174.0, 161.0, 150.5, 136.5, 134.1, 131.0, 128.5, 128.3, 126.4, 125.5, 124.3, 122.6, 121.2, 119.0, 118.6, 118.2, 114.3, 112.7, 111.7, 109.1, 63.8, 60.0, 55.4, 48.6 ppm; HRMS (ESI): calcd. for C<sub>27</sub>H<sub>23</sub>N<sub>2</sub>O<sub>2</sub> [M+H]<sup>+</sup>: 407.1760, found 407.1762.

**2'-(1*H*-indol-3-yl)-2-(*m*-tolyl)spiro[cyclopentane-1,3'-indolin]-2-en-4-one (2s):** Reaction of

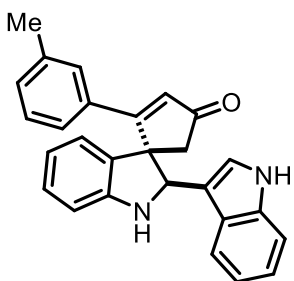

ynone **1e** (50 mg, 0.182 mmol), indole (21.4 mg, 0.182 mmol) and AgOTf (1 mg, 0.003 mmol) following the GP1 afforded the title compound **2s** as pale brown solid (68 mg, 95% yield); *R<sub>f</sub>*: 0.43 (40% Ethyl Acetate-Petroleum Ether); <sup>1</sup>H NMR (400 MHz, DMSO-*d*<sub>6</sub>) δ 11.08 (d, *J* = 1.58 Hz, 1H), 7.51 (s, 1H), 7.42-7.25 (m, 5H), 7.15-7.01 (m, 3H), 6.94-6.88 (m, 1H), 6.82 (ddd, *J* = 14.95, 7.40, 0.76 Hz, 1H), 6.73 (d, *J* = 7.71 Hz, 1H), 6.68-6.63 (m, 2H), 6.35 (d, *J* = 2.85 Hz, 1H), 5.56 (d, *J* = 2.74 Hz, 1H), 2.80 (d, *J* = 18.42 Hz, 1H), 2.28 (s, 3H), 2.06 (d, *J* = 18.41 Hz, 1H) ppm; <sup>13</sup>C{<sup>1</sup>H} NMR (100 MHz, DMSO-*d*<sub>6</sub>) δ 205.8, 174.8, 150.7, 138.1, 136.5, 133.8, 133.5, 131.2, 130.3, 129.9, 128.6, 128.5, 126.4, 126.2, 124.3, 122.7, 121.3, 119.2, 118.6, 118.3, 112.7, 111.8, 109.1, 63.6, 60.3, 48.7, 21.2 ppm; HRMS (ESI): calcd. for C<sub>27</sub>H<sub>23</sub>N<sub>2</sub>O [M+H]<sup>+</sup>: 391.1810, found 391.1811.

**2-(3-fluorophenyl)-2'-(1H-indol-3-yl)spiro[cyclopentane-1,3'-indolin]-2-en-4-one (2t):**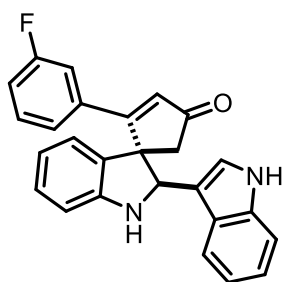

Reaction of ynone **1f** (50 mg, 0.180 mmol), indole (21.1 mg, 0.180 mmol) and AgOTf (1 mg, 0.003 mmol) following the GP1 afforded the title compound **2t** as pale brown solid (66 mg, 93% yield);  $R_f$ : 0.46 (40% Ethyl Acetate-Petroleum Ether);  $^1\text{H}$  NMR (400 MHz, DMSO- $d_6$ )  $\delta$  11.10 (d,  $J = 1.92$  Hz, 1H), 7.54-7.48 (m, 2H), 7.47-7.42 (m, 1H), 7.36-7.30 (m, 2H), 7.28 (d,  $J = 2.38$  Hz, 1H), 7.12 (ddd,  $J = 15.33$ , 7.62, 1.25 Hz, 1H), 7.08-7.01 (m, 2H), 6.94 (d,  $J = 6.83$  Hz, 1H), 6.84 (ddd,  $J = 15.12$ , 7.53, 0.90 Hz, 1H), 6.77 (s, 1H), 6.73 (d,  $J = 7.60$  Hz, 1H), 6.66 (ddd,  $J = 14.86$ , 7.39, 0.94 Hz, 1H), 6.39 (d,  $J = 2.76$  Hz, 1H), 5.52 (d,  $J = 2.57$  Hz, 1H), 2.80 (d,  $J = 18.49$  Hz, 1H), 2.10 (d,  $J = 18.49$  Hz, 1H) ppm;  $^{13}\text{C}\{^1\text{H}\}$  NMR (100 MHz, DMSO- $d_6$ )  $\delta$  205.7, 172.7 (d,  $J = 2.30$  Hz), 161.9 (d,  $J = 243.91$  Hz), 150.8, 136.6, 135.7 (d,  $J = 7.76$  Hz), 133.1, 131.5, 130.9 (d,  $J = 8.37$  Hz), 128.7, 126.3, 125.3 (d,  $J = 2.29$  Hz), 122.9, 121.3, 119.1, 118.7, 118.3, 117.3 (d,  $J = 21.23$  Hz), 115.6 (d,  $J = 22.92$  Hz), 112.6, 111.8, 109.2, 63.6, 60.2, 48.7 ppm;  $^{19}\text{F}$  NMR (376 MHz, DMSO- $d_6$ )  $\delta$  -107.02 ppm; HRMS (ESI): calcd. for  $\text{C}_{26}\text{H}_{20}\text{N}_2\text{OF}$   $[\text{M}+\text{H}]^+$ : 395.1560, found 395.1562.

**2-(2-fluorophenyl)-2'-(1H-indol-3-yl)spiro[cyclopentane-1,3'-indolin]-2-en-4-one (2u):**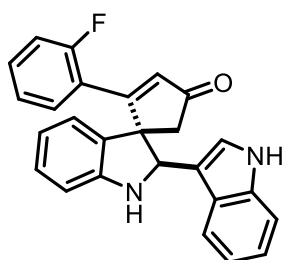

Reaction of ynone **1g** (75 mg, 0.270 mmol), indole (31.7 mg, 0.270 mmol) and AgOTf (1.4 mg, 0.005 mmol) following the GP1 afforded the title compound **2u** as pale brown solid (102 mg, 95% yield);  $R_f$ : 0.41 (40% Ethyl Acetate-Petroleum Ether);  $^1\text{H}$  NMR (400 MHz, DMSO- $d_6$ )  $\delta$  11.11 (d,  $J = 1.71$  Hz, 1H), 7.54-7.41 (m, 2H), 7.38-7.34 (m, 1H), 7.30-7.24 (m, 2H), 7.19-7.09 (m, 3H), 7.05 (ddd,  $J = 15.16$ , 7.10, 0.96 Hz, 1H), 7.01-6.96 (m, 1H), 6.85 (ddd,  $J = 15.01$ , 7.10, 0.87 Hz, 1H), 6.72-6.66 (m, 2H), 6.51 (d,  $J = 3.20$  Hz, 1H), 5.42 (s, 1H), 2.72 (d,  $J = 18.48$  Hz, 1H), 2.12 (d,  $J = 18.46$  Hz, 1H) ppm;  $^{13}\text{C}\{^1\text{H}\}$  NMR (100 MHz, DMSO- $d_6$ )  $\delta$  206.1, 167.6 (d,  $J = 2.27$  Hz), 161.6, 159.1, 150.8, 136.6, 134.1 (d,  $J = 9.18$  Hz), 132.6, 132.1 (d,  $J = 9.09$  Hz), 130.1, 127.4 (d,  $J = 250.0$  Hz), 124.4, 124.3 (d,  $J = 3.37$  Hz), 122.7, 121.8 (d,  $J = 11.77$  Hz), 121.3, 119.1, 118.7, 118.2, 116.8 (d,  $J = 23.51$  Hz), 112.6, 111.8, 109.1, 63.3, 61.5, 47.7 ppm; HRMS (ESI): calcd. for  $\text{C}_{26}\text{H}_{20}\text{N}_2\text{OF}$   $[\text{M}+\text{H}]^+$ : 395.1560, found 395.1558.

**2'-(1*H*-indol-3-yl)-2-(thiophen-2-yl)spiro[cyclopentane-1,3'-indolin]-2-en-4-one (2v):**

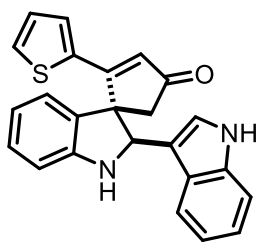

Reaction of ynone **1h** (70 mg, 0.263 mmol), indole (30.9 mg, 0.263 mmol) and AgOTf (1.4 mg, 0.005 mmol) following the GP1 afforded the title compound **2v** as yellow solid (93 mg, 92% yield);  $R_f$ : 0.43 (40% Ethyl Acetate-Petroleum Ether);  $^1\text{H}$  NMR (400 MHz, DMSO- $d_6$ )  $\delta$  11.09 (s, 1H), 7.88 (dd,  $J$  = 5.08, 0.91 Hz, 1H), 7.54 (d,  $J$  = 2.92 Hz, 1H), 7.36-7.30 (m, 2H), 7.20 (dd,  $J$  = 8.80, 3.81, 1H), 7.15-7.09 (m, 2H), 7.05-7.01 (m, 1H), 6.92 (d,  $J$  = 7.22 Hz, 1H), 6.83 (ddd,  $J$  = 14.68, 7.57, 1.04 Hz, 1H), 6.72 (d,  $J$  = 7.74 Hz, 1H), 6.63 (ddd,  $J$  = 14.73, 7.38, 0.82 Hz, 1H), 6.52 (s, 1H), 6.39 (d,  $J$  = 2.78 Hz, 1H), 5.65 (d,  $J$  = 2.74 Hz, 1H), 2.82 (d,  $J$  = 18.27 Hz, 1H), 2.03 (d,  $J$  = 18.32 Hz, 1H) ppm;  $^{13}\text{C}\{^1\text{H}\}$  NMR (100 MHz, DMSO- $d_6$ )  $\delta$  204.7, 168.1, 151.3, 136.5, 136.2, 132.7, 132.1, 131.4, 128.7, 128.4, 127.8, 126.5, 124.4, 123.6, 121.2, 118.9, 118.6, 118.1, 112.3, 111.7, 109.0, 64.6, 60.2, 47.7 ppm; HRMS (ESI): calcd. for  $\text{C}_{24}\text{H}_{19}\text{N}_2\text{OS}$   $[\text{M}+\text{H}]^+$ : 383.1218, found 383.1217.

**2'-(1*H*-indol-3-yl)-2-pentylspiro[cyclopentane-1,3'-indolin]-2-en-4-one (2w):** Reaction of

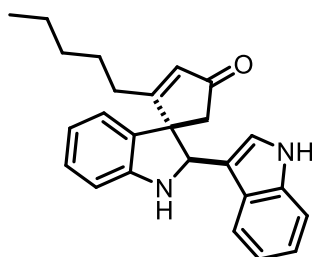

Reaction of ynone **1i** (50 mg, 0.197 mmol), indole (23.1 mg, 0.197 mmol) and AgOTf (1 mg, 0.004 mmol) following the GP1 afforded the title compound **2w** as brown solid (66 mg, 90% yield);  $R_f$ : 0.55 (40% Ethyl Acetate-Petroleum Ether);  $^1\text{H}$  NMR (400 MHz, DMSO- $d_6$ )  $\delta$  11.06 (d,  $J$  = 1.67 Hz, 1H), 7.35 (d,  $J$  = 8.12 Hz, 1H), 7.30-7.27 (m, 1H), 7.21 (d,  $J$  = 7.95 Hz, 1H), 7.09-7.02 (m, 2H), 6.90-6.82 (m, 2H), 6.66-6.62 (m, 2H), 6.19 (d,  $J$  = 1.85 Hz, 1H), 5.95 (s, 1H), 5.26 (d,  $J$  = 1.91 Hz, 1H), 2.72-2.61 (m, 1H), 2.51 (d,  $J$  = 18.43 Hz, 1H), 2.30-2.21 (m, 1H), 1.97 (d,  $J$  = 18.35 Hz, 1H), 1.70-1.51 (m, 2H), 1.37-1.24 (m, 4H), 0.86 (t,  $J$  = 7.20 Hz, 3H) ppm;  $^{13}\text{C}\{^1\text{H}\}$  NMR (100 MHz, DMSO- $d_6$ )  $\delta$  206.4, 184.0, 151.6, 136.7, 132.0, 128.4, 128.3, 126.1, 124.5, 122.7, 121.2, 119.5, 118.7, 117.7, 113.6, 111.7, 108.7, 63.5, 61.0, 46.6, 31.0, 28.9, 26.4, 21.9, 13.9 ppm; HRMS (ESI): calcd. for  $\text{C}_{25}\text{H}_{27}\text{N}_2\text{O}$   $[\text{M}+\text{H}]^+$ : 371.2123, found 371.2125.

**2-cyclopropyl-2'-(1*H*-indol-3-yl)spiro[cyclopentane-1,3'-indolin]-2-en-4-one (2x):**

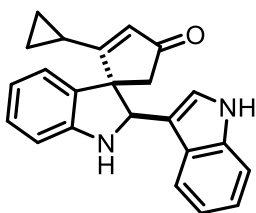

Reaction of ynone **1j** (65 mg, 0.291 mmol), indole (34.1 mg, 0.291 mmol) and AgOTf (1.5 mg, 0.006 mmol) following the GP1 afforded the title compound **2x** as pale brown solid (97 mg, 98% yield);  $R_f$ : 0.37 (40% Ethyl Acetate-Petroleum Ether);  $^1\text{H}$  NMR (400 MHz, DMSO- $d_6$ )

$\delta$ ) ppm;  $^{13}\text{C}\{^1\text{H}\}$  NMR (100 MHz, DMSO- $d_6$ )  $\delta$  11.07 (d,  $J$  = 1.82 Hz, 1H), 7.42-7.33 (m, 2H), 7.31 (d,  $J$  = 2.41 Hz, 1H), 7.09-7.03 (m, 2H), 6.93-6.86 (m, 2H), 6.70-6.65 (m, 2H), 6.21 (bs, 1H), 5.60 (s, 1H), 5.52 (s, 1H), 2.56 (d,  $J$  = 18.30 Hz, 1H), 1.91 (d,  $J$  = 18.23 Hz, 1H), 1.75-1.69 (m, 1H), 1.36-1.29 (m, 1H), 1.15-1.08 (m, 1H), 1.01-0.95 (m, 1H), 0.94-0.86 (m, 1H) ppm;  $^{13}\text{C}\{^1\text{H}\}$  NMR (100 MHz, DMSO- $d_6$ )  $\delta$  205.9, 188.3, 151.6, 136.6, 132.7, 128.3, 126.3, 124.4, 122.9, 122.4, 121.2, 119.6, 118.7, 118.1, 113.0, 111.7, 109.0, 63.9, 61.5, 46.7, 13.7, 13.6, 11.5 ppm; HRMS (ESI): calcd. for  $\text{C}_{23}\text{H}_{21}\text{N}_2\text{O}$   $[\text{M}+\text{H}]^+$ : 341.1654, found 341.1653.

**5'-(benzyloxy)-2'-(1H-indol-3-yl)-2-phenylspiro[cyclopentane-1,3'-indolin]-2-en-4-one**

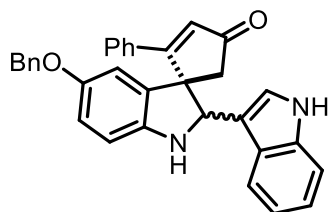

**(2z):** Reaction of ynone **11** (80 mg, 0.219 mmol), indole (25.7 mg, 0.219 mmol) and AgOTf (1.1 mg, 0.004 mmol) following the GP1 afforded the title compound **2z** in an inseparable diastereomeric mixture (dr = 4:1) as brown solid (94 mg, 89% yield);  $R_f$ : 0.37 (40% Ethyl Acetate-Petroleum Ether);  $^1\text{H}$  NMR (400 MHz, DMSO- $d_6$ )  $\delta$  11.09 (d,  $J$  = 1.75 Hz, 1H), 7.72-7.66 (m, 2H), 7.55-7.45 (m, 3H), 7.40-7.27 (m, 7H), 7.25-7.20 (m, 2H), 7.07-7.00 (m, 2H), 6.85-6.80 (m, 1H), 6.706.67 (m, 2H), 6.02 (d,  $J$  = 3.62 Hz, 1H), 5.57 (d,  $J$  = 3.17 Hz, 1H), 4.95 (dd,  $J$  = 33.02 Hz, 11.96 Hz, 2H), 2.85 (d,  $J$  = 18.42 Hz, 1H), 2.08 (d,  $J$  = 18.41 Hz, 1H) ppm;  $^{13}\text{C}\{^1\text{H}\}$  NMR (100 MHz, DMSO- $d_6$ )  $\delta$  205.6, 174.0, 151.9, 144.8, 137.5, 136.4, 135.0, 133.4, 130.8, 130.5, 129.2, 128.8, 128.3, 127.7, 126.4, 124.4, 119.0, 118.5, 115.2, 112.6, 111.7, 110.3, 110.0, 70.0, 64.1, 60.6, 48.2 ppm; HRMS (ESI): calcd. for  $\text{C}_{33}\text{H}_{27}\text{N}_2\text{O}_2$   $[\text{M}+\text{H}]^+$ : 483.2073, found 483.2067.

**2'-(1H-indol-3-yl)-1'-methyl-2-phenylspiro[cyclopentane-1,3'-indolin]-2-en-4-one (2aa):**

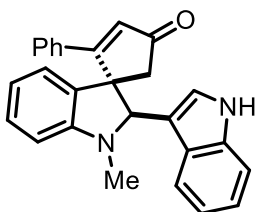

Reaction of ynone **1m** (100 mg, 0.365 mmol), indole (42.9 mg, 0.365 mmol) and AgOTf (1.9 mg, 0.007 mmol) following the GP1 afforded the title compound **2aa** as yellow solid (132.5 mg, 93% yield);  $R_f$ : 0.6 (40% Ethyl Acetate-Petroleum Ether);  $^1\text{H}$  NMR (400 MHz, DMSO- $d_6$ )  $\delta$  11.18 (bs, 1H), 7.60-7.29 (m, 7H), 7.23 (ddd,  $J$  = 15.40, 7.73, 1.26 Hz, 1H), 7.10-6.91 (m, 3H), 6.85-6.74 (m, 3H), 6.69 (s, 1H), 5.04 (bs, 1H), 2.83 (bs, 1H), 2.66 (s, 3H), 2.08 (d,  $J$  = 18.40 Hz, 1H) ppm;  $^{13}\text{C}\{^1\text{H}\}$  NMR (100 MHz, DMSO- $d_6$ )  $\delta$  205.6, 173.7, 151.9, 136.6, 133.5, 131.2, 130.6, 129.2, 129.0, 128.6, 128.4, 128.2, 128.1, 128.0, 127.9, 126.9, 125.2, 122.6, 121.5, 119.3, 112.0, 109.2, 108.8, 71.7, 55.0, 48.6, 34.5 ppm; HRMS (ESI): calcd. for  $\text{C}_{27}\text{H}_{21}\text{N}_2\text{O}$   $[\text{M}-\text{H}]^-$ : 389.1654, found 389.1651.

**2'-(1*H*-indol-3-yl)-2-phenylspiro[cyclohexane-1,3'-indolin]-2-en-4-one (2ab):** Reaction of

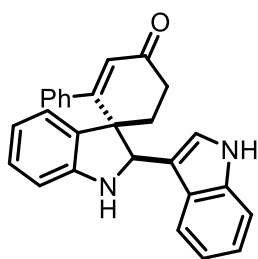

ynone **1n** (70 mg, 0.256 mmol), indole (30 mg, 0.256 mmol) and AgOTf (1.3 mg, 0.005 mmol) following the GP1 afforded the title compound **2ab** as pale brown solid (86 mg, 86% yield);  $R_f$ : 0.62 (40% Ethyl Acetate-Petroleum Ether);  $^1\text{H NMR}$  (400 MHz, DMSO- $d_6$ )  $\delta$  11.04 (d,  $J = 1.76$  Hz, 1H), 7.42-7.38 (m, 3H), 7.33 (d,  $J = 8.13$  Hz, 1H), 7.28-7.24 (m, 2H), 7.17-7.11 (m, 2H), 7.10-7.06 (m, 2H), 7.02 (ddd,  $J = 15.21, 7.66, 0.92$  Hz, 1H), 6.83 (ddd,  $J = 15.03, 7.66, 0.85$  Hz, 1H), 6.75-6.66 (m, 2H), 6.29 (d,  $J = 2.95$  Hz, 1H), 6.19 (s, 1H), 5.58 (d,  $J = 2.85$  Hz, 1H), 2.47-2.36 (m, 1H), 2.08-1.95 (m, 2H), 1.84-1.75 (m, 1H) ppm;  $^{13}\text{C}\{^1\text{H}\}$  NMR (100 MHz, DMSO- $d_6$ )  $\delta$  197.9, 162.8, 150.6, 139.3, 136.4, 131.2, 130.6, 129.0, 128.7, 128.4, 128.3, 126.5, 124.3, 123.9, 121.1, 119.6, 118.5, 117.6, 112.1, 111.6, 109.3, 64.6, 53.3, 32.7, 30.5 ppm; HRMS (ESI): calcd. for  $\text{C}_{27}\text{H}_{23}\text{N}_2\text{O}$   $[\text{M}+\text{H}]^+$ : 391.1810, found 391.1809.

**2-phenyl-2'-(1*H*-pyrrol-2-yl)spiro[cyclopentane-1,3'-indolin]-2-en-4-one (2ae):** Reaction

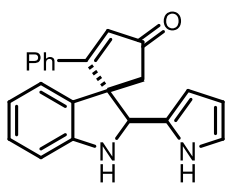

of ynone **1a** (100 mg, 0.385 mmol), pyrrole (25.9 mg, 0.385 mmol) and AgOTf (2 mg, 0.007 mmol) following the GP1 afforded the title compound **2ae** as brown solid (115 mg, 91% yield);  $R_f$ : 0.55 (40% Ethyl Acetate-Petroleum Ether);  $^1\text{H NMR}$  (400 MHz, DMSO- $d_6$ )  $\delta$  10.8 (s, 1H), 7.56-7.52 (m, 2H), 7.45-7.35 (m, 3H), 7.12-7.08 (m, 1H), 6.91 (d,  $J = 7.30$  Hz, 1H), 6.75-6.70 (m, 2H), 6.69-6.65 (m, 2H), 6.42 (bs, 1H), 5.94 (dd,  $J = 5.50, 2.50$  Hz, 1H), 5.64 (s, 1H), 5.17 (s, 1H), 2.47 (d,  $J = 18.45$  Hz, 1H), 2.00 (d,  $J = 18.42$  Hz, 1H) ppm;  $^{13}\text{C}\{^1\text{H}\}$  NMR (100 MHz, DMSO- $d_6$ )  $\delta$  205.5, 173.7, 150.4, 133.5, 133.1, 130.9, 130.4, 129.0, 128.8, 128.53, 128.50, 123.0, 118.8, 117.7, 109.6, 107.8, 105.9, 64.0, 61.0, 48.5 ppm; HRMS (ESI): calcd. for  $\text{C}_{22}\text{H}_{17}\text{N}_2\text{O}$   $[\text{M}-\text{H}]^-$ : 325.1341, found 325.1342.

**2-phenyl-2'-(1-phenyl-1*H*-pyrrol-2-yl)spiro[cyclopentane-1,3'-indolin]-2-en-4-one (2af):**

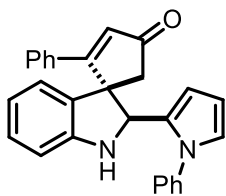

Reaction of ynone **1a** (50 mg, 0.192 mmol), pyrrole (27.6 mg, 0.192 mmol) and AgOTf (1 mg, 0.003 mmol) following the GP1 afforded the title compound **2af** as brown solid (60 mg, 77% yield);  $R_f$ : 0.66 (40% Ethyl Acetate-Petroleum Ether);  $^1\text{H NMR}$  (400 MHz, DMSO- $d_6$ )  $\delta$  7.28-7.23 (m, 1H), 7.15-7.05 (m, 5H), 7.04 (ddd,  $J = 15.21, 7.52, 1.17$  Hz, 1H), 7.00-6.92 (m, 4H), 6.77 (dd,  $J = 4.52, 1.91$  Hz, 1H), 6.71-6.66 (m, 2H), 6.54 (ddd,  $J = 14.80, 7.42, 0.75$  Hz, 1H), 6.42 (dd,  $J = 3.41, 1.80$  Hz, 1H), 6.36 (d,  $J = 2.81$  Hz, 1H), 6.32 (s, 1H), 6.21 (dd,  $J = 6.33, 2.70$  Hz,

1H), 5.50 (d,  $J = 2.68$  Hz, 1H), 2.63 (d,  $J = 18.52$  Hz, 1H), 2.04 (d,  $J = 18.50$  Hz, 1H) ppm;  $^{13}\text{C}\{^1\text{H}\}$  NMR (100 MHz, DMSO- $d_6$ )  $\delta$  205.3, 173.6, 150.1, 139.0, 133.0, 132.3, 131.8, 130.1, 129.4, 129.0, 128.6, 128.5, 128.2, 127.5, 126.0, 123.9, 122.7, 118.3, 110.2, 108.8, 108.6, 61.5, 60.1, 49.3 ppm; HRMS (ESI): calcd. for  $\text{C}_{28}\text{H}_{23}\text{N}_2\text{O}$   $[\text{M}+\text{H}]^+$ : 403.1810, found 403.1816.

**2'-(5-methoxythiophen-2-yl)-2-phenylspiro[cyclopentane-1,3'-indolin]-2-en-4-one (2ag):**

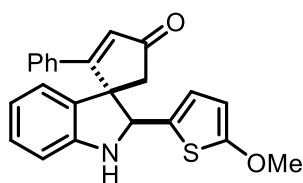

Reaction of ynone **1a** (100 mg, 0.385 mmol), 2-methoxythiophene (44 mg, 0.385 mmol) and AgOTf (2 mg, 0.007 mmol) following the GP1 afforded the title compound **2ag** as yellow solid (129 mg, 89% yield);  $R_f$ : 0.69 (40% Ethyl Acetate-Petroleum Ether);  $^1\text{H}$  NMR (400 MHz,  $\text{CDCl}_3$ )  $\delta$  7.37-7.21 (m, 5H), 7.16-7.05 (m, 2H), 6.98-6.93 (m, 1H), 6.79-6.70 (m, 2H), 6.51 (s, 1H), 6.31 (d,  $J = 3.50$  Hz, 1H), 5.92 (d,  $J = 3.68$  Hz, 1H), 5.25 (s, 1H), 3.74 (s, 3H), 2.91 (d,  $J = 18.82$  Hz, 1H), 2.16 (d,  $J = 18.81$  Hz, 1H) ppm;  $^{13}\text{C}\{^1\text{H}\}$  NMR (100 MHz,  $\text{CDCl}_3$ )  $\delta$  206.7, 174.4, 165.8, 148.9, 133.9, 133.4, 132.3, 130.4, 129.0, 128.99, 128.95, 127.4, 123.3, 122.4, 120.8, 110.4, 103.5, 65.8, 61.6, 60.2, 48.0 ppm; HRMS (ESI): calcd. for  $\text{C}_{23}\text{H}_{20}\text{NO}_2\text{S}$   $[\text{M}+\text{H}]^+$ : 374.1215, found 374.1219.

**2'-(azulen-1-yl)-2-phenylspiro[cyclopentane-1,3'-indolin]-2-en-4-one (2ah):** Reaction of

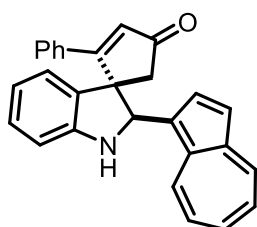

ynone **1a** (50 mg, 0.193 mmol), azulene (24.7 mg, 0.193 mmol) and AgOTf (1 mg, 0.003 mmol) following the GP1 afforded the title compound **2ah** as dark blue solid (64 mg, 86% yield);  $R_f$ : 0.71 (40% Ethyl Acetate-Petroleum Ether);  $^1\text{H}$  NMR (400 MHz, DMSO- $d_6$ )  $\delta$  8.38 (d,  $J = 9.29$  Hz, 1H), 8.01-7.96 (m, 1H), 7.75-7.60 (m, 4H), 7.56-7.47 (m, 3H), 7.45-7.40 (m, 1H), 7.25-7.13 (m, 2H), 6.98-6.86 (m, 2H), 6.82-6.69 (m, 2H), 6.63 (s, 1H), 6.52 (d,  $J = 3.02$  Hz, 1H), 5.97 (d,  $J = 3.02$  Hz, 1H), 2.54 (d,  $J = 18.53$  Hz, 1H), 2.08 (d,  $J = 18.39$  Hz, 1H) ppm;  $^{13}\text{C}\{^1\text{H}\}$  NMR (100 MHz, DMSO- $d_6$ )  $\delta$  205.3, 174.0, 150.7, 141.3, 138.5, 137.4, 137.3, 135.9, 133.7, 133.6, 133.4, 131.0, 130.8, 129.3, 129.0, 128.6, 126.6, 123.5, 122.8, 122.1, 118.8, 117.4, 109.5, 64.1, 61.0, 48.9 ppm; HRMS (ESI): calcd. for  $\text{C}_{28}\text{H}_{22}\text{NO}$   $[\text{M}+\text{H}]^+$ : 388.1701, found 388.1701.

**2-phenylspiro[cyclopentane-1,3'-indolin]-2-en-4-one (3a):** Reaction of ynone **1a** (100 mg,

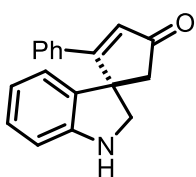

0.385 mmol), Hantzsch ester (97.7 mg, 0.385 mmol) and AgOTf (2 mg, 0.007 mmol) following the GP1 afforded the title compound **3a** as pale yellow oil (92 mg, 91% yield);  $R_f$ : 0.5 (40% Ethyl Acetate-Petroleum Ether);  $^1\text{H}$  NMR (400 MHz,  $\text{CDCl}_3$ )  $\delta$  7.30-7.25 (m, 3H), 7.24-7.20 (m, 2H), 7.18 (s, 1H), 7.06



(ddd,  $J = 15.23, 7.65, 1.20$  Hz, 1H), 6.90-6.87 (m, 1H), 6.72-6.66 (m, 2H), 6.51 (s, 1H), 3.92 (d,  $J = 9.92$  Hz, 1H), 3.51 (d,  $J = 9.95$  Hz, 1H), 2.88 (d,  $J = 18.72$  Hz, 1H), 2.75 (d,  $J = 18.72$  Hz, 1H) ppm;  $^{13}\text{C}\{^1\text{H}\}$  NMR (100 MHz,  $\text{CD}_3\text{OD}$ )  $\delta$  206.4, 175.2, 151.4, 133.3, 133.0, 130.5, 129.4, 128.7, 128.6, 128.5, 122.2, 117.9, 109.2, 57.4, 55.5, 55.3 ppm; HRMS (ESI): calcd. for  $\text{C}_{18}\text{H}_{16}\text{NO}$   $[\text{M}+\text{H}]^+$ : 262.1232, found 262.1229.

**2'-methyl-2-phenylspiro[cyclopentane-1,3'-indolin]-2-en-4-one (3b):** Reaction of ynone **1o**

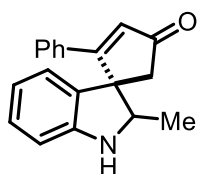

(100 mg, 0.365 mmol), Hantzsch ester (92.7 mg, 0.365 mmol) and AgOTf (2 mg, 0.007 mmol) following the GP1 afforded the title compound **3b** as pale yellow oil (95 mg, 94% yield);  $R_f$ : 0.6 (40% Ethyl Acetate-Petroleum Ether);  $^1\text{H}$  NMR (400 MHz,  $\text{DMSO-d}_6$ )  $\delta$  7.35-7.27 (m, 3H), 7.24-7.18 (m, 2H), 7.04 (dt,  $J = 7.60, 1.24$  Hz, 1H), 6.98 (d,  $J = 7.29$  Hz, 1H), 6.64-6.59 (m, 2H), 6.49 (s, 1H), 5.97 (d,  $J = 3.29$  Hz, 1H), 4.08-4.02 (m, 1H), 3.06 (d,  $J = 18.65$  Hz, 1H), 2.65 (d,  $J = 18.70$  Hz, 1H), 1.03 (d,  $J = 6.66$  Hz, 3H) ppm;  $^{13}\text{C}\{^1\text{H}\}$  NMR (100 MHz,  $\text{DMSO-d}_6$ )  $\delta$  206.2, 176.8, 151.9, 135.6, 132.2, 130.9, 130.0, 128.7, 128.3, 128.2, 123.5, 118.3, 109.3, 65.0, 58.3, 53.2, 15.3 ppm; HRMS (ESI): calcd. for  $\text{C}_{19}\text{H}_{18}\text{NO}$   $[\text{M}+\text{H}]^+$ : 276.1388, found 276.1392.

**5'-methoxy-2'-methyl-2-phenylspiro[cyclopentane-1,3'-indolin]-2-en-4-one (3c):** Reaction

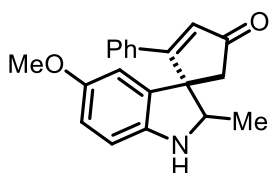

of ynone **1p** (100 mg, 0.329 mmol), Hantzsch ester (83.5 mg, 0.329 mmol) and AgOTf (1.7 mg, 0.006 mmol) following the GP1 afforded the title compound **3c** as yellow oil (53 mg, 54% yield);  $R_f$ : 0.45 (40% Ethyl Acetate-Petroleum Ether);  $^1\text{H}$  NMR (400 MHz,  $\text{CD}_3\text{OD}$ )  $\delta$  7.34-7.28 (m, 1H), 7.27-7.19 (m, 4H), 6.78-6.74 (m, 1H), 6.67 (s, 1H), 6.65 (d,  $J = 6.28$  Hz, 1H), 6.40 (s, 1H), 4.08 (q,  $J = 6.71$  Hz, 1H), 3.69 (s, 3H), 3.16 (d,  $J = 18.92$  Hz, 1H), 2.67 (d,  $J = 18.98$  Hz, 1H), 1.12 (d,  $J = 6.71$  Hz, 3H) ppm;  $^{13}\text{C}\{^1\text{H}\}$  NMR (100 MHz,  $\text{CD}_3\text{OD}$ )  $\delta$  209.5, 180.4, 155.7, 146.9, 137.1, 135.0, 131.9, 131.1, 129.4, 129.3, 115.7, 112.5, 110.5, 67.2, 60.9, 56.3, 53.9, 15.6 ppm; HRMS (ESI): calcd. for  $\text{C}_{20}\text{H}_{20}\text{NO}_2$   $[\text{M}+\text{H}]^+$ : 306.1494, found 306.1495.

### 5. Special Note:

During the  $^{13}\text{C}\{^1\text{H}\}$  NMR data acquisition of compound **2x**, we used sample concentration of  $\sim 0.8$ (M), relaxation time was 4 sec., and 3820 scans. In lower concentrations and with less relaxation time, many peaks were absent. The reason for this abnormality is currently unclear.

## 6. X-ray Structures:

Crystal data and structure refinement for **2c**: CCDC: 2296145

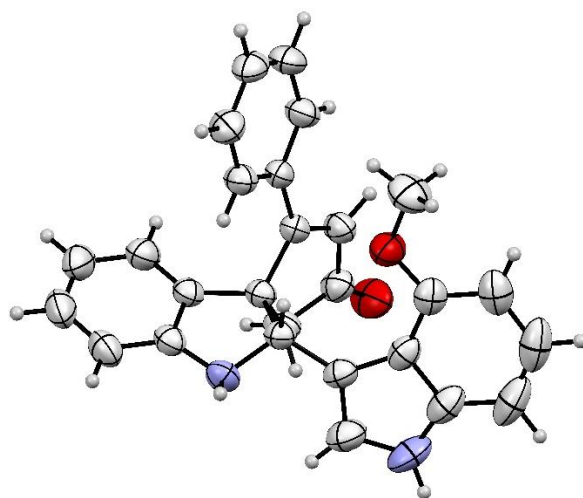

**Figure S3:** ORTEP representation of compound **2c**.

The ellipsoid contour % probability levels in the caption for the image of **2c** was 50%.

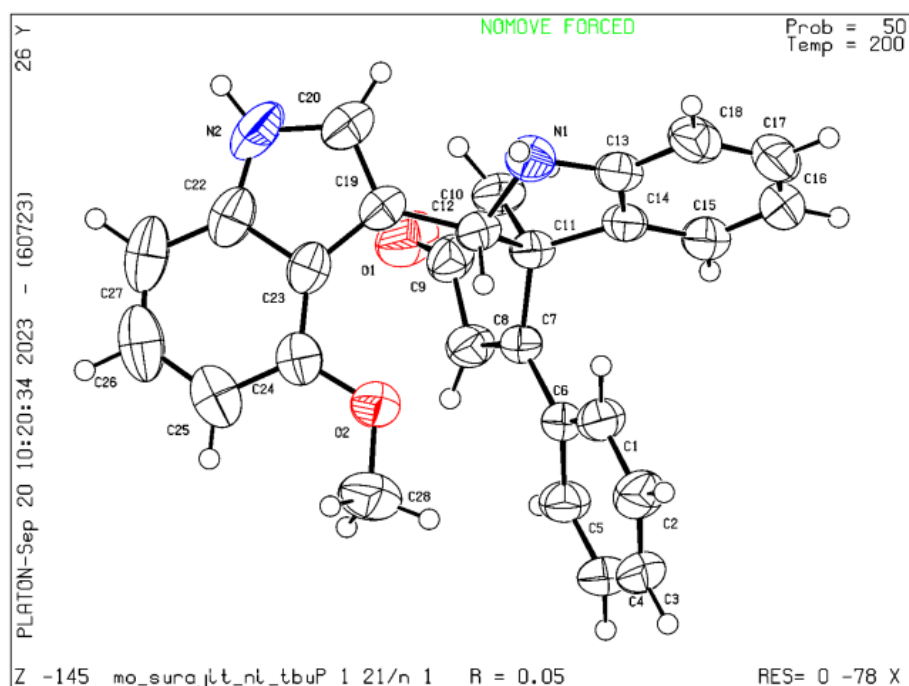

**Table S1** Crystal data and structure refinement for **2c**.

|                     |                                                               |
|---------------------|---------------------------------------------------------------|
| Identification code | 2c                                                            |
| Empirical formula   | C <sub>27</sub> H <sub>22</sub> N <sub>2</sub> O <sub>2</sub> |
| Formula weight      | 406.46                                                        |

|                                             |                                                               |
|---------------------------------------------|---------------------------------------------------------------|
| Temperature/K                               | 200.0                                                         |
| Crystal system                              | monoclinic                                                    |
| Space group                                 | P2 <sub>1</sub> /n                                            |
| a/Å                                         | 15.1135(6)                                                    |
| b/Å                                         | 10.4102(4)                                                    |
| c/Å                                         | 15.4220(5)                                                    |
| $\alpha$ /°                                 | 90                                                            |
| $\beta$ /°                                  | 119.0150(10)                                                  |
| $\gamma$ /°                                 | 90                                                            |
| Volume/Å <sup>3</sup>                       | 2121.88(14)                                                   |
| Z                                           | 4                                                             |
| $\rho_{\text{calc}}/\text{cm}^3$            | 1.272                                                         |
| $\mu/\text{mm}^{-1}$                        | 0.081                                                         |
| F(000)                                      | 856.0                                                         |
| Crystal size/mm <sup>3</sup>                | 0.2 × 0.11 × 0.07                                             |
| Radiation                                   | MoK $\alpha$ ( $\lambda$ = 0.71073)                           |
| 2 $\theta$ range for data collection/°      | 4.944 to 56.628                                               |
| Index ranges                                | -20 ≤ h ≤ 20, -13 ≤ k ≤ 13, -20 ≤ l ≤ 20                      |
| Reflections collected                       | 51553                                                         |
| Independent reflections                     | 5280 [R <sub>int</sub> = 0.0384, R <sub>sigma</sub> = 0.0178] |
| Data/restraints/parameters                  | 5280/0/278                                                    |
| Goodness-of-fit on F <sup>2</sup>           | 1.077                                                         |
| Final R indexes [I >= 2 $\sigma$ (I)]       | R <sub>1</sub> = 0.0499, wR <sub>2</sub> = 0.1208             |
| Final R indexes [all data]                  | R <sub>1</sub> = 0.0615, wR <sub>2</sub> = 0.1278             |
| Largest diff. peak/hole / e Å <sup>-3</sup> | 0.19/-0.17                                                    |

Crystal data and structure refinement for **2m**: CCDC: 2296148

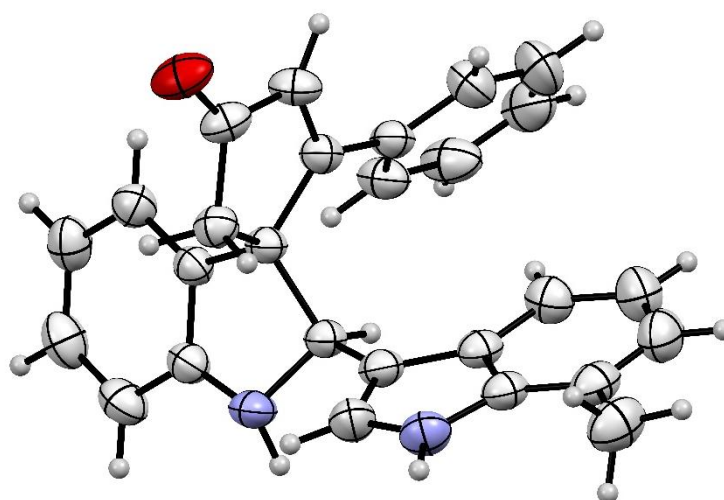

**Figure S4:** ORTEP representation of compound **2m**.

The ellipsoid contour % probability levels in the caption for the image of **2m** was 50%.

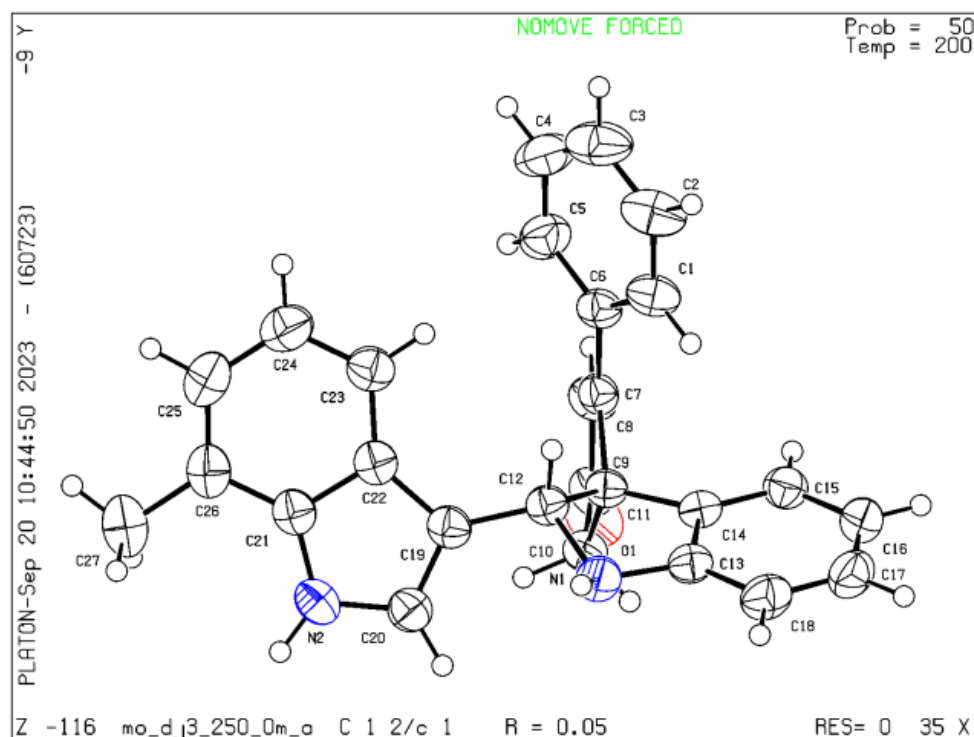

**Table S2 Crystal data and structure refinement for 2m.**

|                                    |                                                  |
|------------------------------------|--------------------------------------------------|
| Identification code                | 2m                                               |
| Empirical formula                  | C <sub>27</sub> H <sub>22</sub> N <sub>2</sub> O |
| Formula weight                     | 390.46                                           |
| Temperature/K                      | 200(2)                                           |
| Crystal system                     | monoclinic                                       |
| Space group                        | C2/c                                             |
| a/Å                                | 37.641(3)                                        |
| b/Å                                | 7.1425(6)                                        |
| c/Å                                | 15.2538(12)                                      |
| α/°                                | 90                                               |
| β/°                                | 99.978(3)                                        |
| γ/°                                | 90                                               |
| Volume/Å <sup>3</sup>              | 4039.0(6)                                        |
| Z                                  | 8                                                |
| ρ <sub>calc</sub> /cm <sup>3</sup> | 1.284                                            |
| μ/mm <sup>-1</sup>                 | 0.078                                            |
| F(000)                             | 1648.0                                           |
| Crystal size/mm <sup>3</sup>       | 0.22 × 0.12 × 0.09                               |
| Radiation                          | MoKα (λ = 0.71073)                               |
| 2θ range for data collection/°     | 5.424 to 56.516                                  |
| Index ranges                       | -47 ≤ h ≤ 45, -9 ≤ k ≤ 9, -16 ≤ l ≤ 20           |
| Reflections collected              | 12385                                            |

Independent reflections      4339 [ $R_{\text{int}} = 0.0530$ ,  $R_{\text{sigma}} = 0.0605$ ]  
Data/restraints/parameters    4339/0/278  
Goodness-of-fit on  $F^2$         1.033  
Final R indexes [ $I \geq 2\sigma(I)$ ]    $R_1 = 0.0531$ ,  $wR_2 = 0.1229$   
Final R indexes [all data]      $R_1 = 0.0857$ ,  $wR_2 = 0.1374$   
Largest diff. peak/hole /  $e \text{ \AA}^{-3}$  0.16/-0.18

## 7. References:

1. (a) James, M. J.; Cuthbertson, J. D.; O'Brien, P.; Taylor, R. J. K.; Unsworth. *Angew. Chem., Int. Ed.* **2015**, *54*, 7640. (b) Liddon, J. T. R.; Clarke, A. K.; Taylor, R. J. K.; Unsworth, W. P. *Org. Lett.* **2016**, *18*, 6328. (c) James, M. J.; Clubley, R. E.; Palate, K. Y.; Procter, T. J.; Wyton, A. C.; O'Brien, P.; Taylor, R. J. K.; Unsworth, W. P. *Org. Lett.* **2015**, *17*, 4372.
2. Ru, G.-X.; Zhang, M.; Zhang, T.-T.; Jiang, X.-L.; Gao, G.-Q.; Zhu, X.-H.; Wang, S.; Fan, C.-L.; Li, X.; Shen, W.-B. *Org. Chem. Front.* **2022**, *9*, 2621.

## Copies of $^1\text{H}$ and $^{13}\text{C}$ NMR Spectra

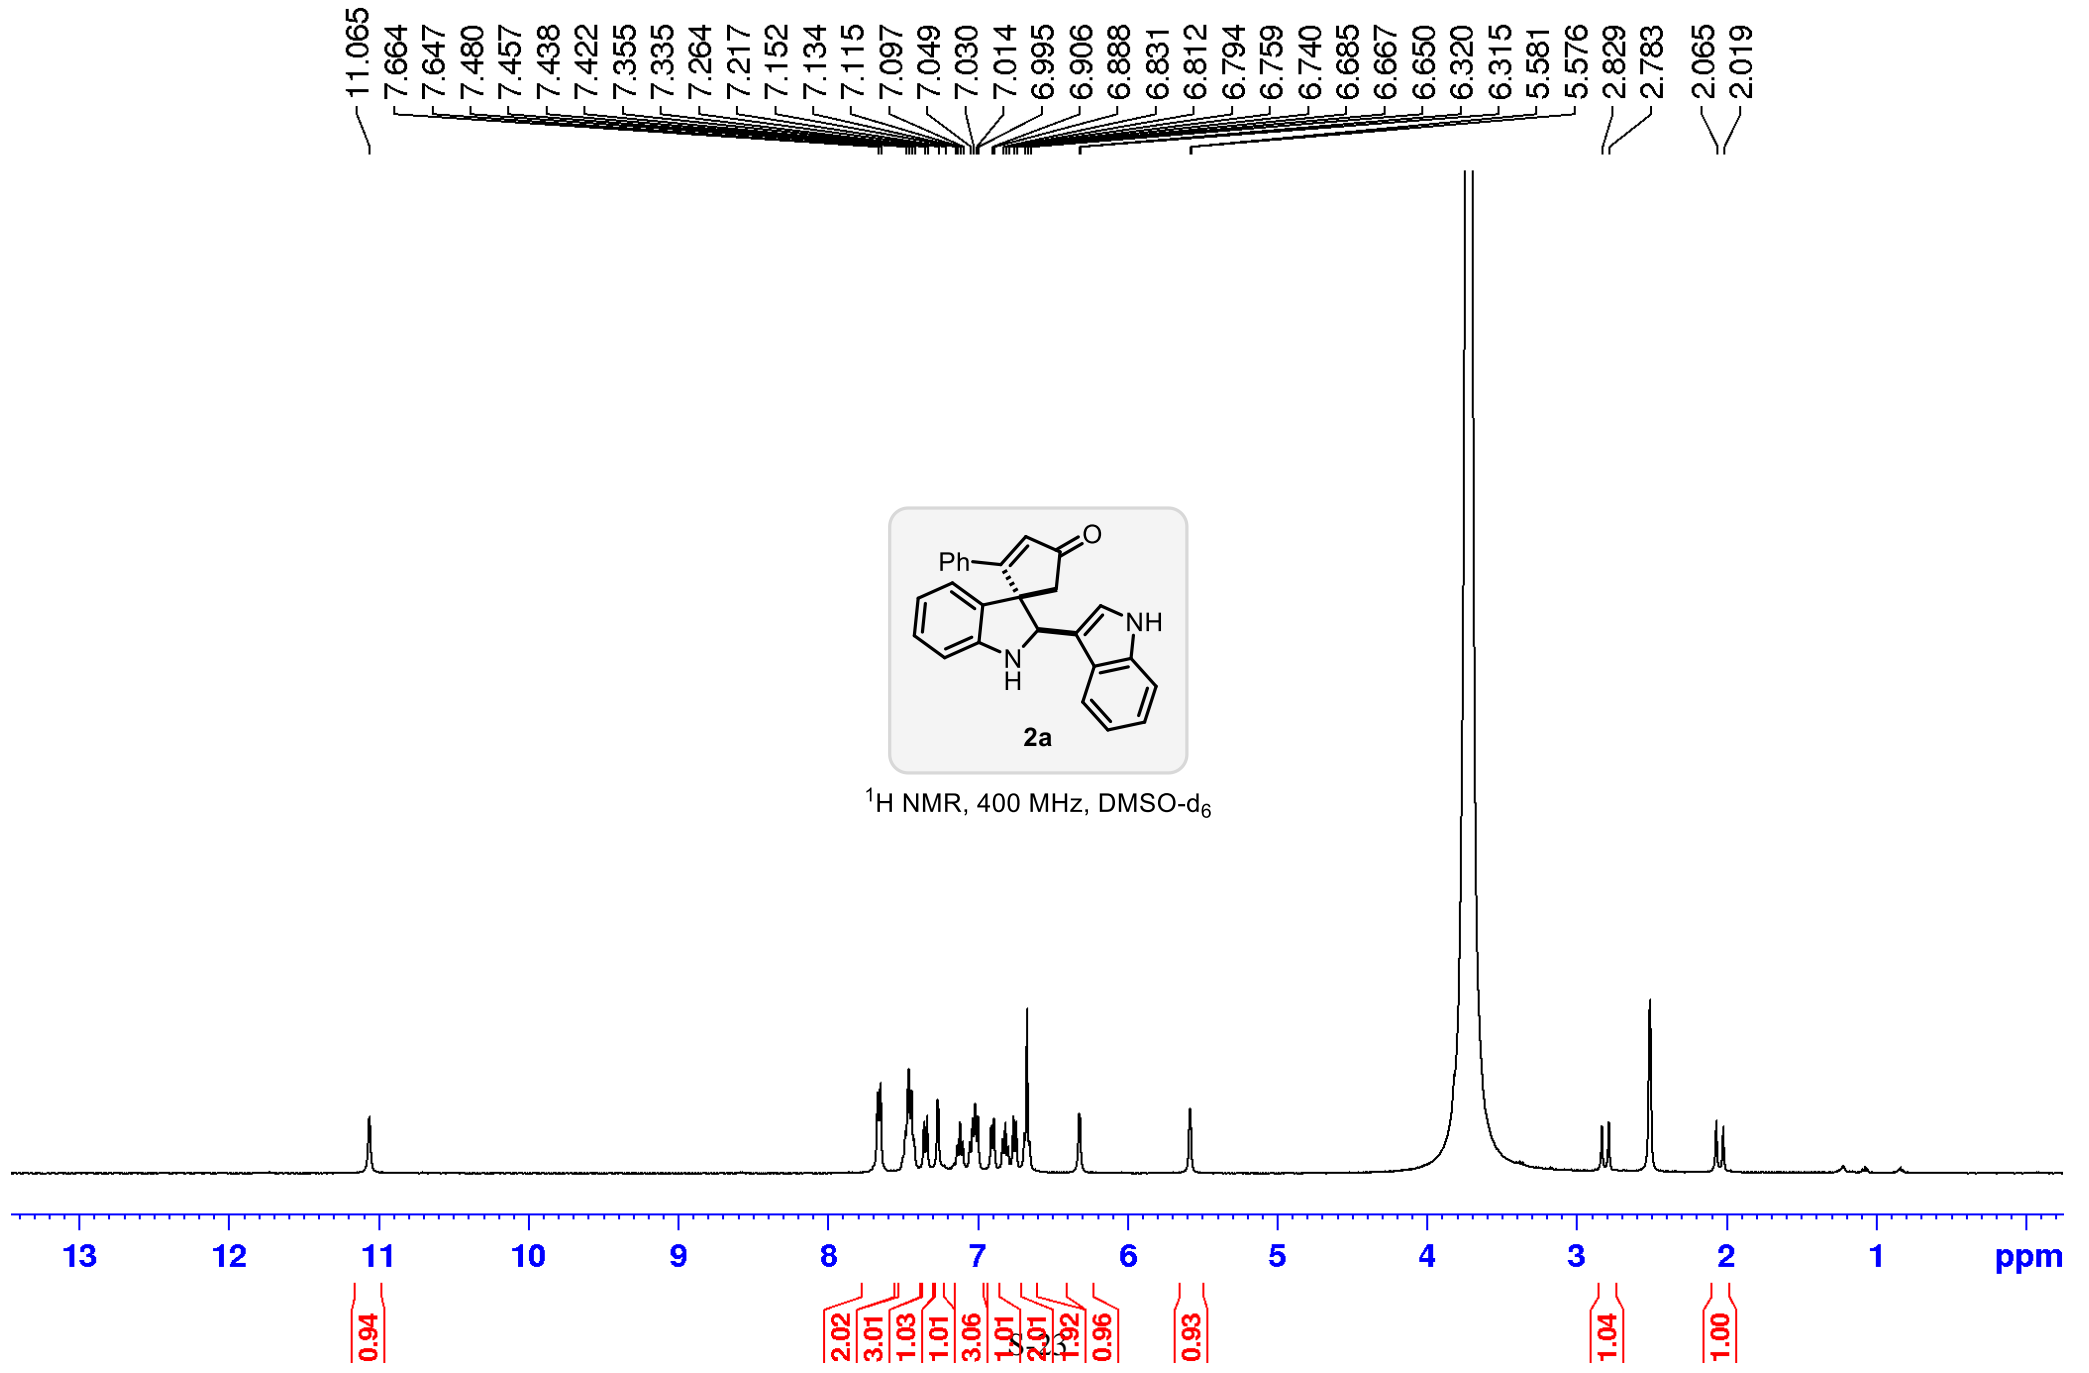

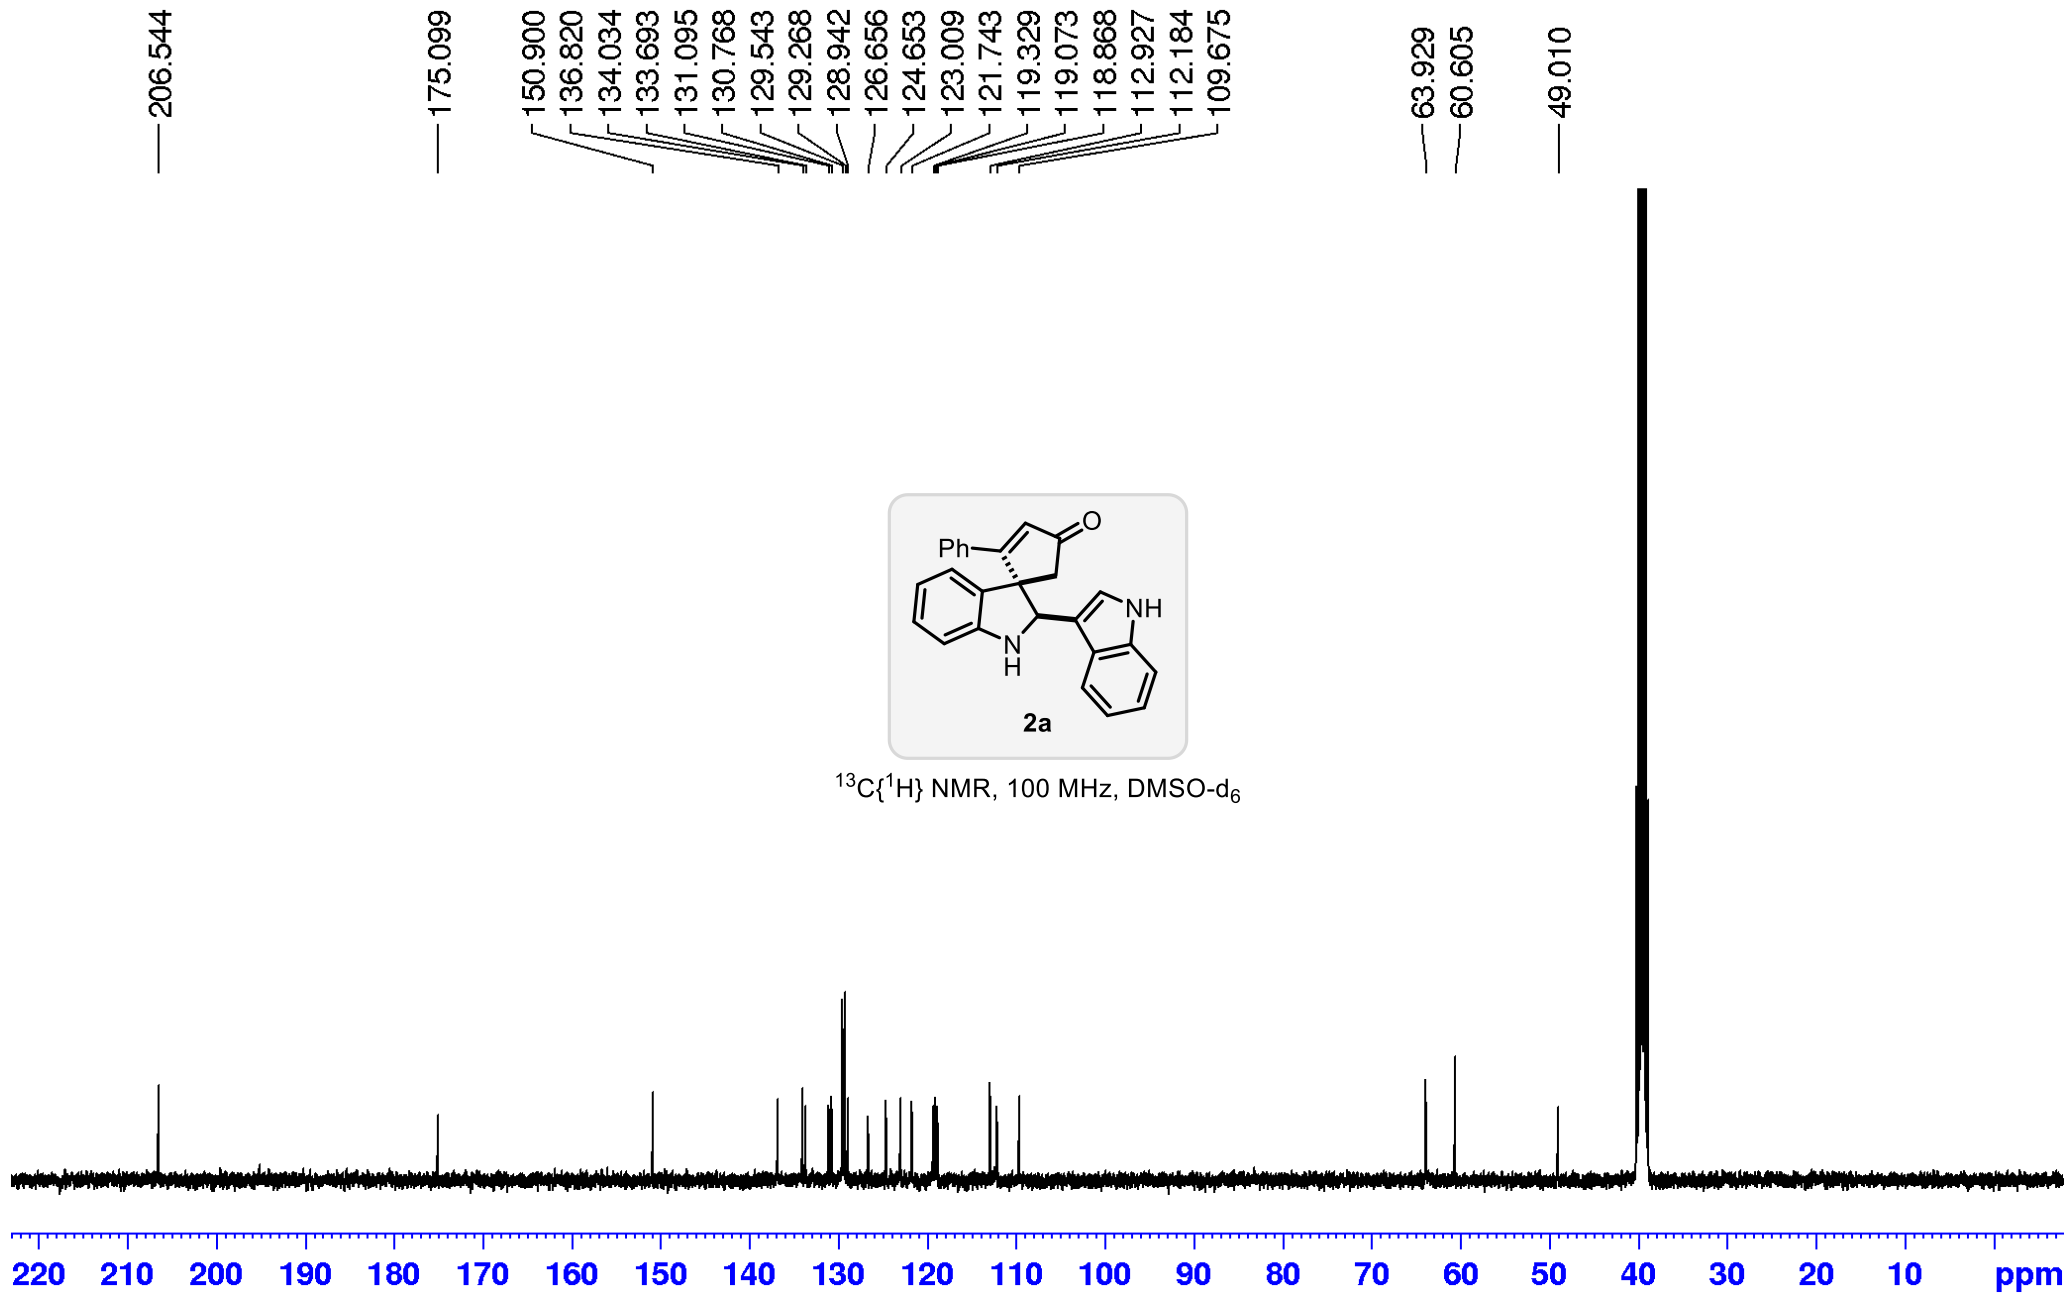



11.172  
11.168  
7.569  
7.552  
7.548  
7.441  
7.438  
7.431  
7.423  
7.417  
7.406  
7.402  
7.389  
7.370  
7.358  
7.353  
7.349  
7.282  
7.276  
7.213  
7.193  
7.096  
7.094  
7.075  
7.058  
7.056  
6.944  
6.926  
6.906  
6.837  
6.819  
6.684  
6.665  
6.648  
6.640  
6.589  
6.571  
6.554  
6.552  
6.402  
5.769  
2.735  
2.688  
2.206  
2.160  
2.124

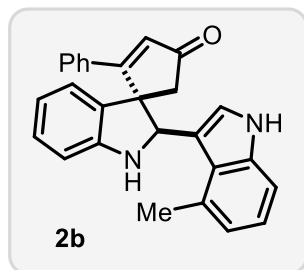

<sup>1</sup>H NMR, 400 MHz, DMSO-d<sub>6</sub>

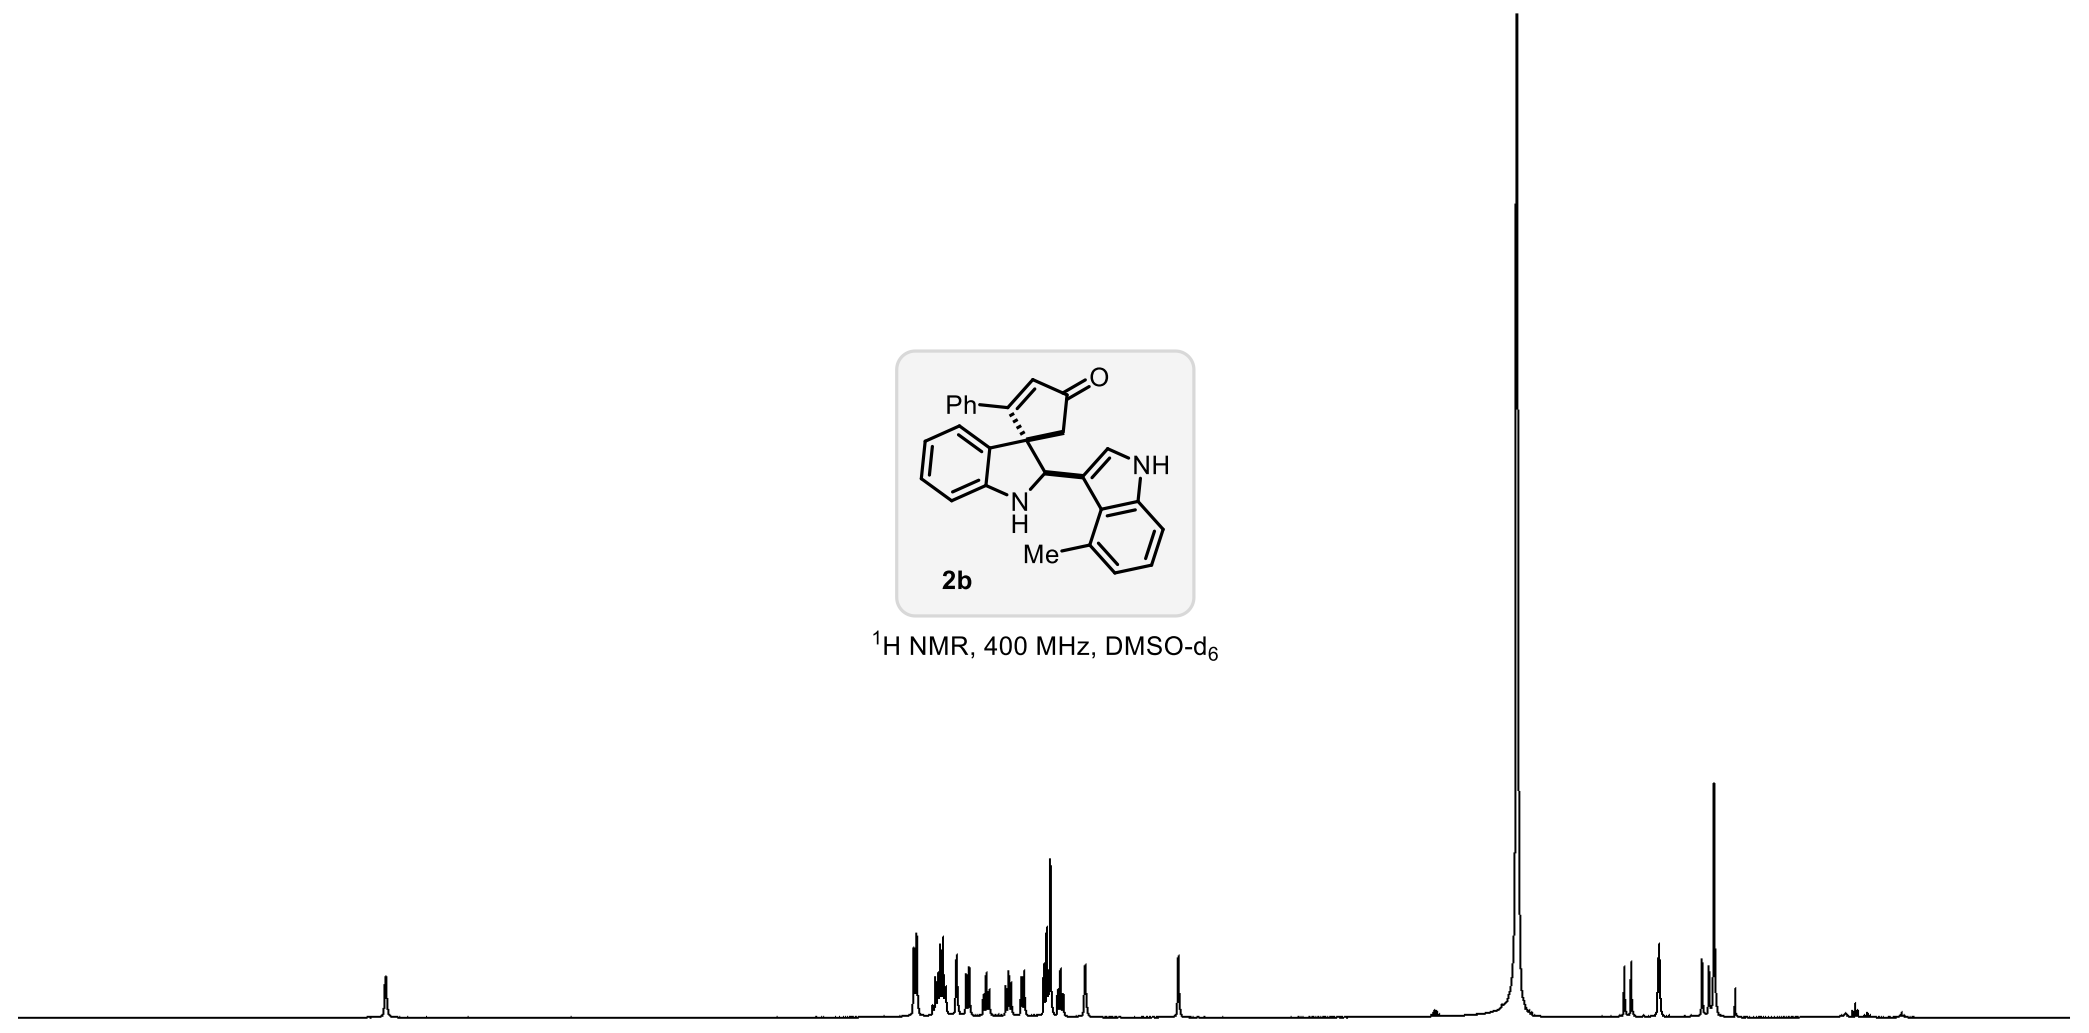

13 12 11 10 9 8 7 6 5 4 3 2 1 ppm

1.02  
2.09  
3.11  
1.11  
1.03  
1.05  
1.04  
1.08  
3.08  
1.06  
1.00  
1.04  
1.02  
1.05  
3.00

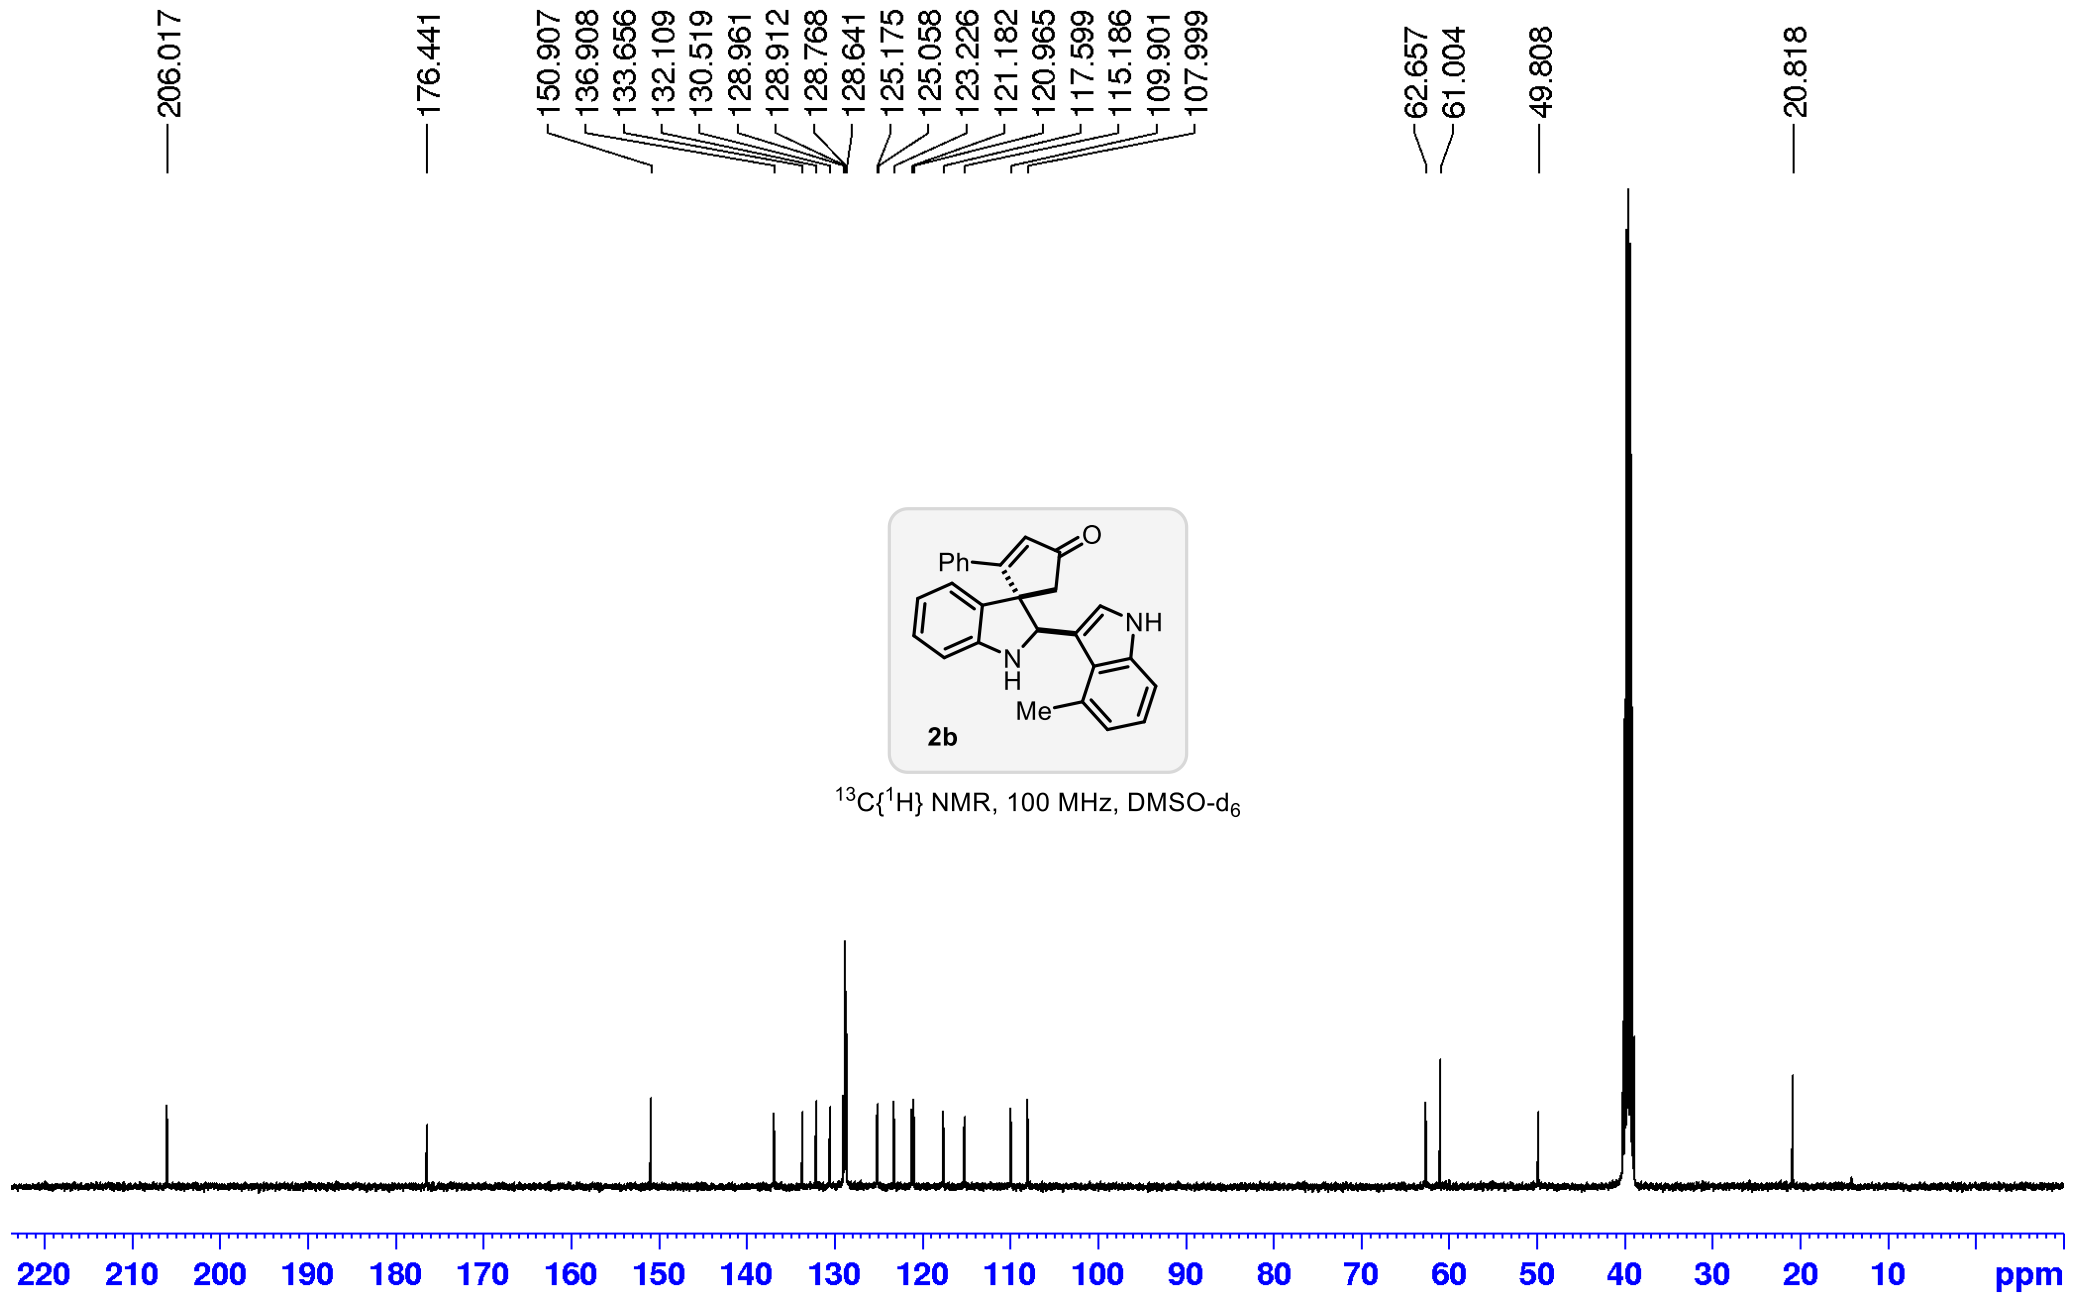

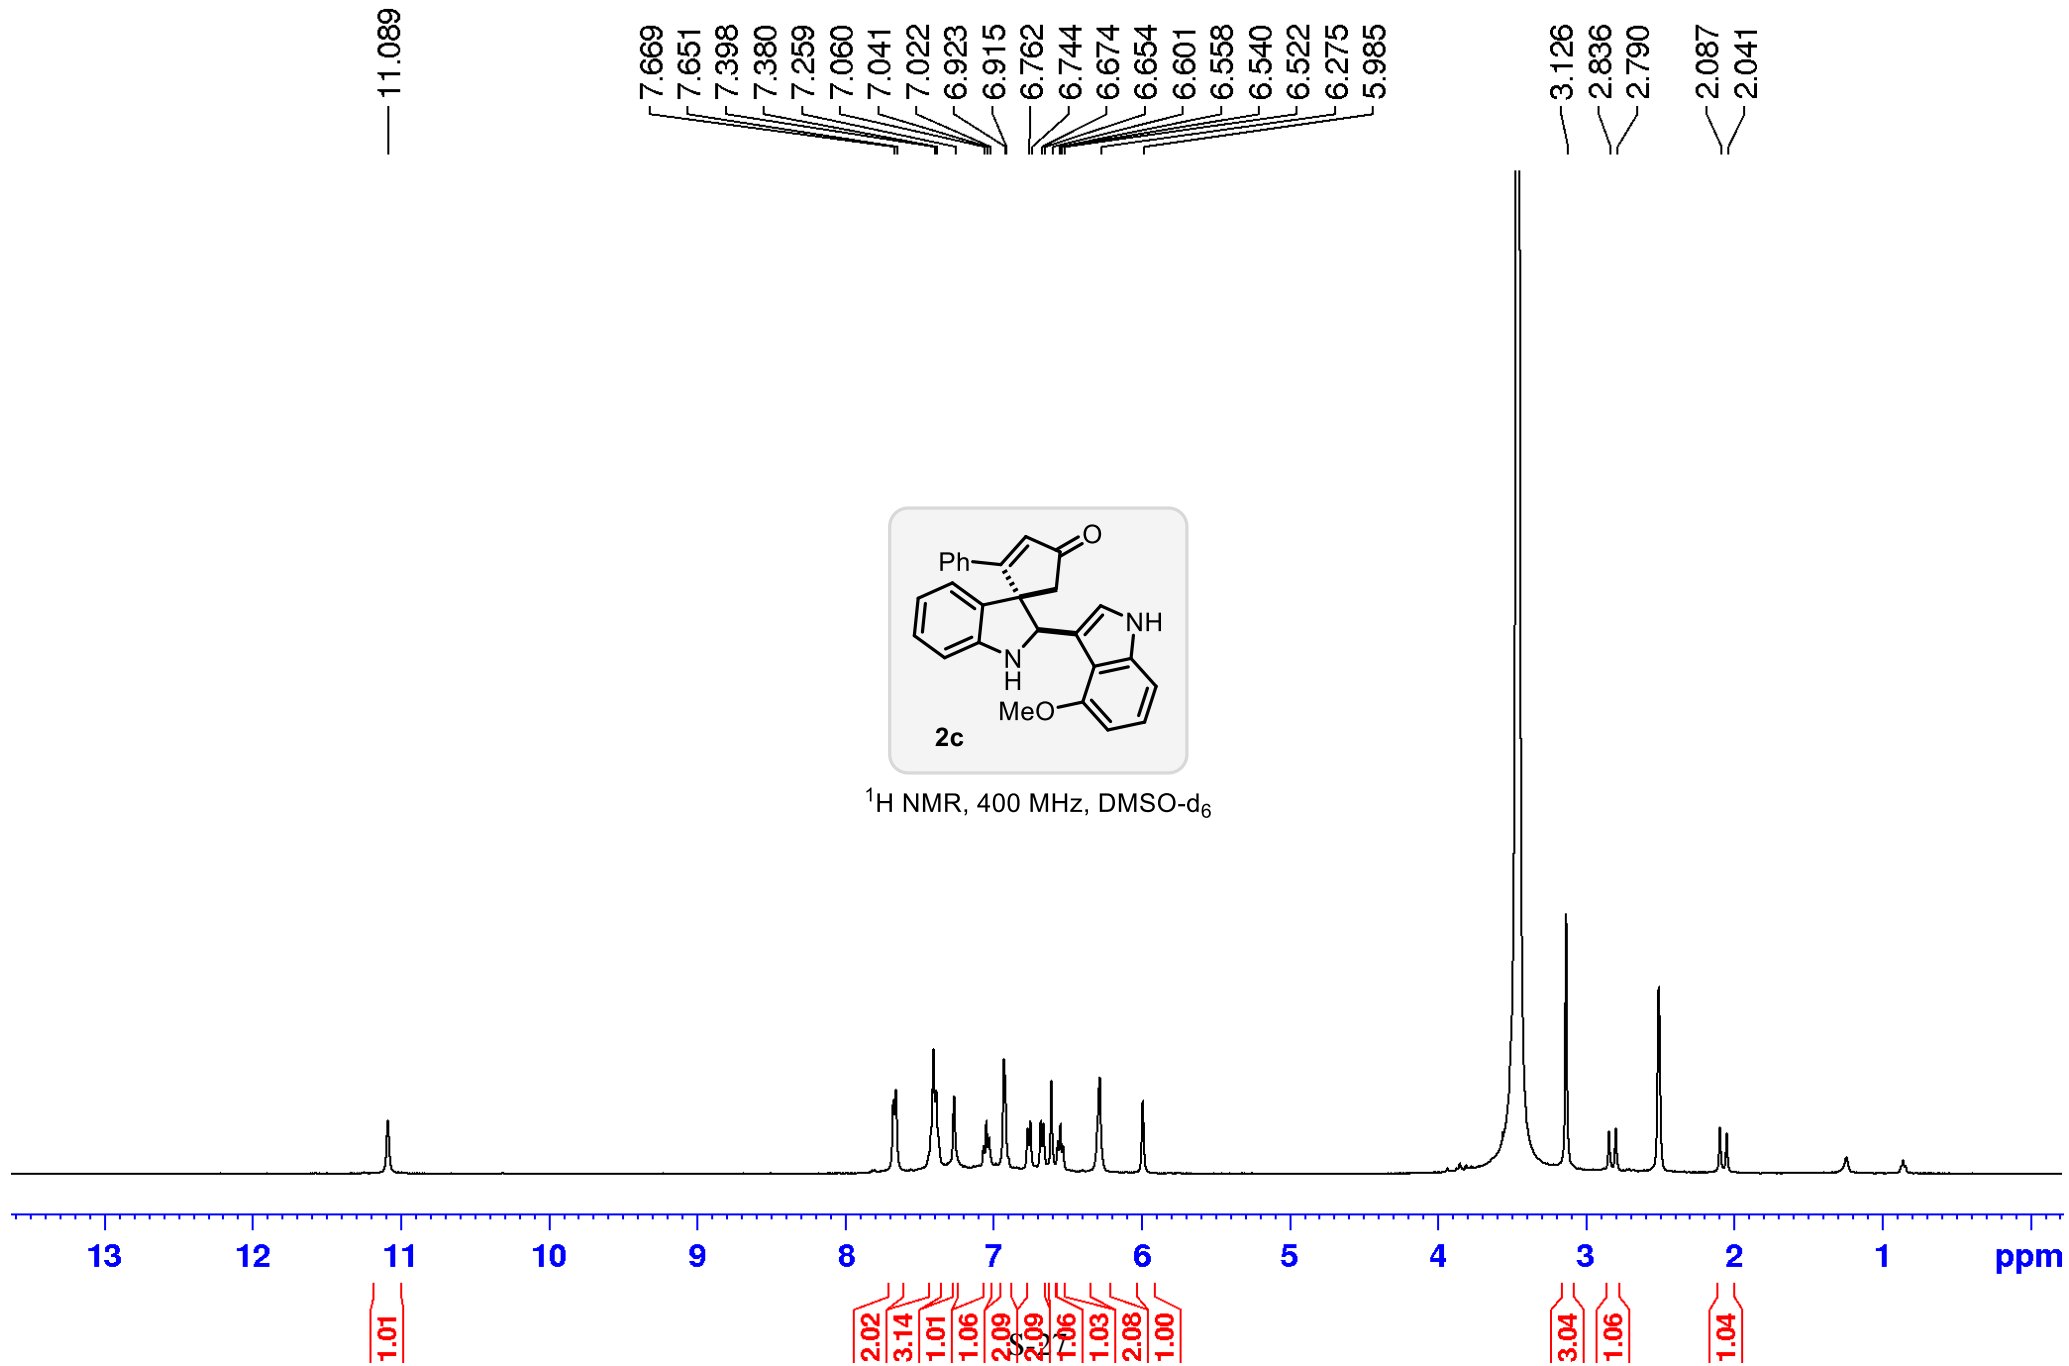

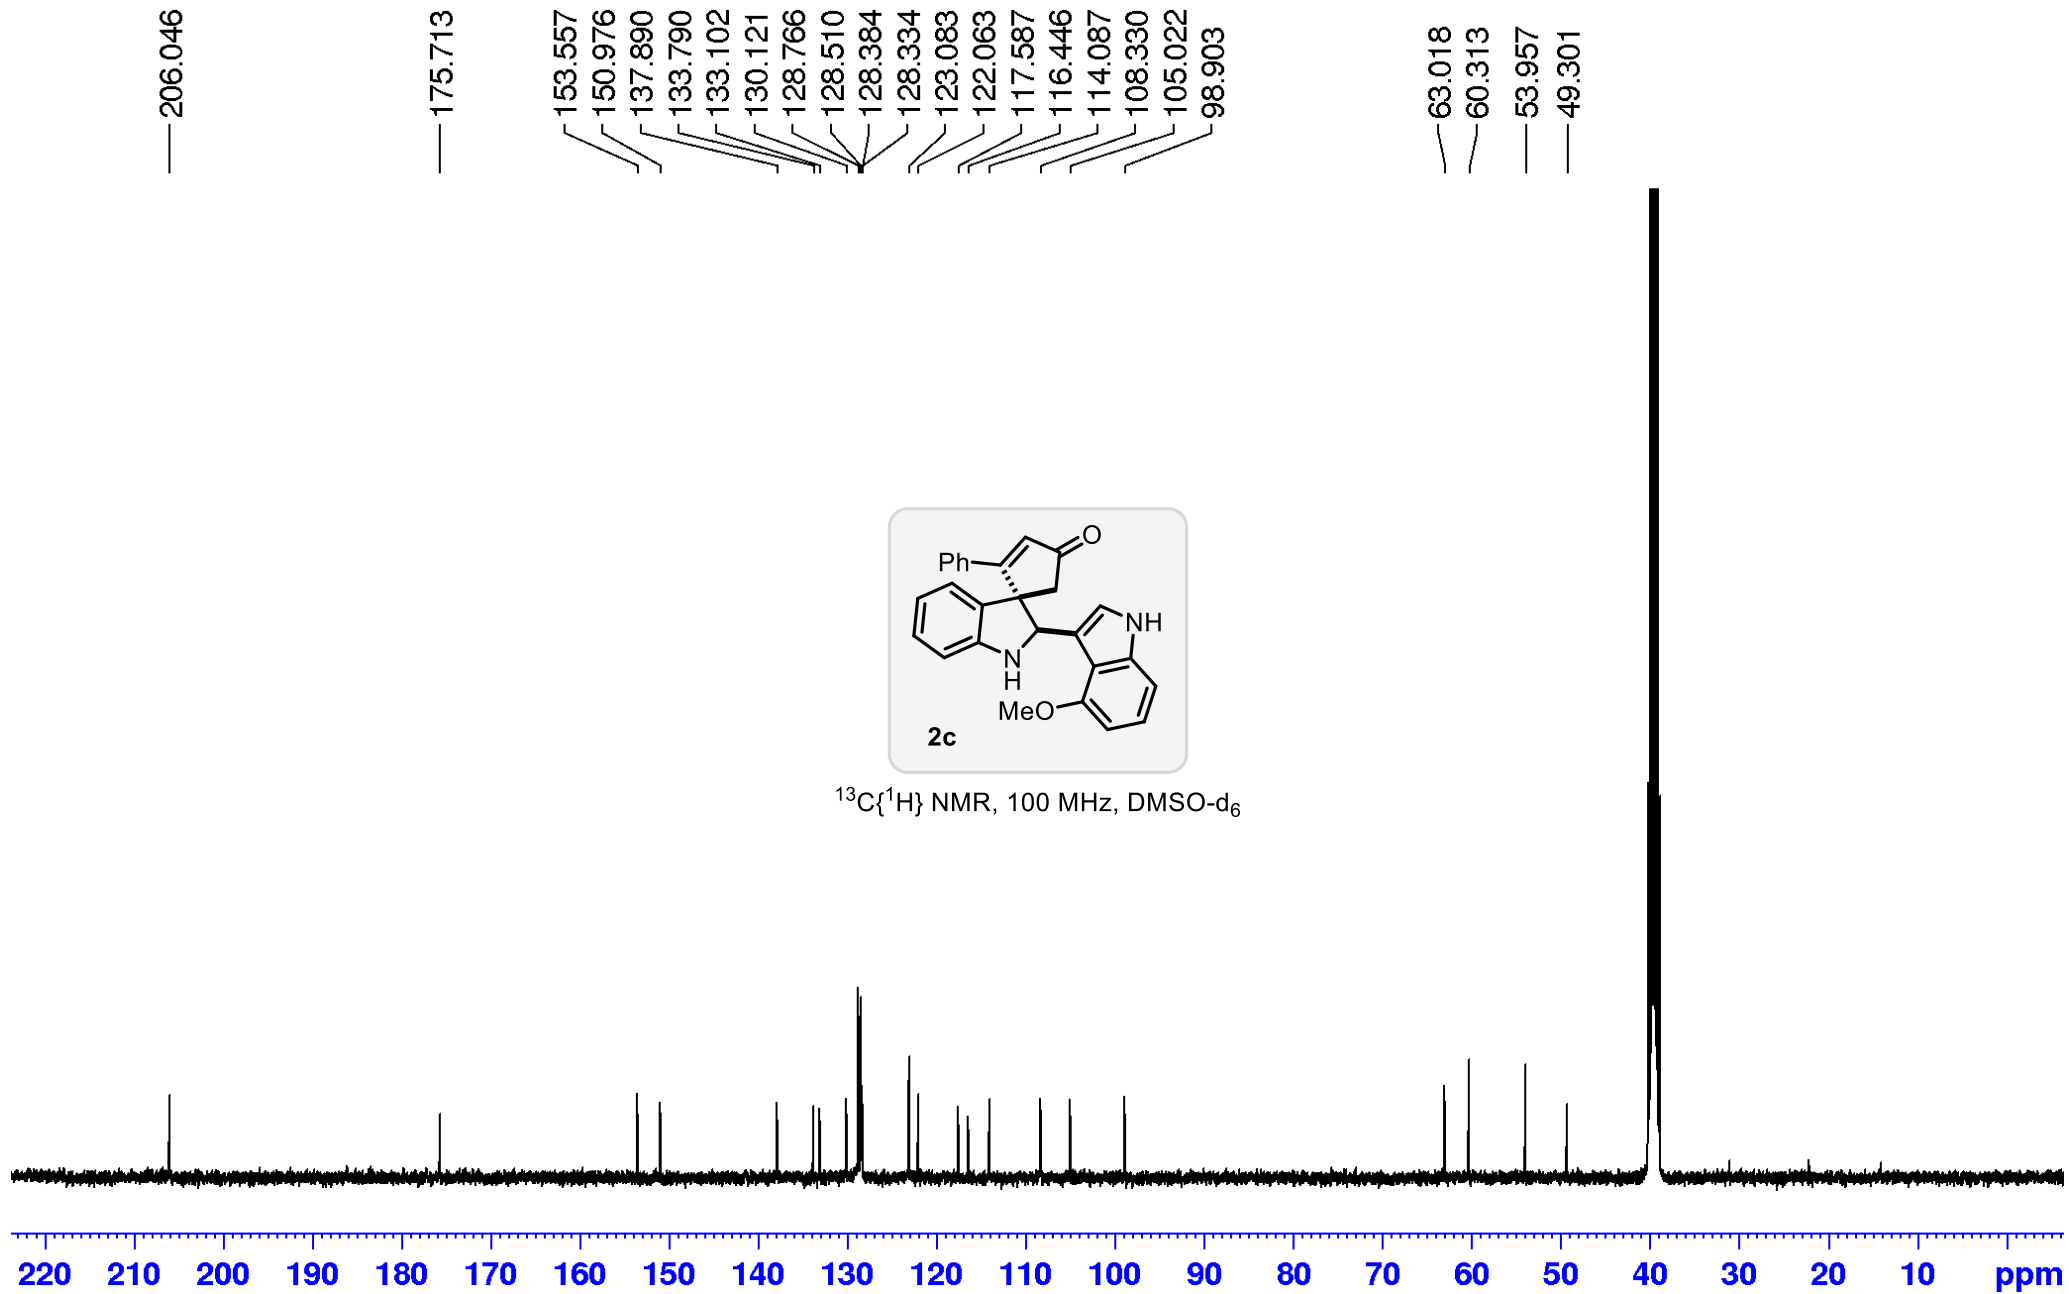

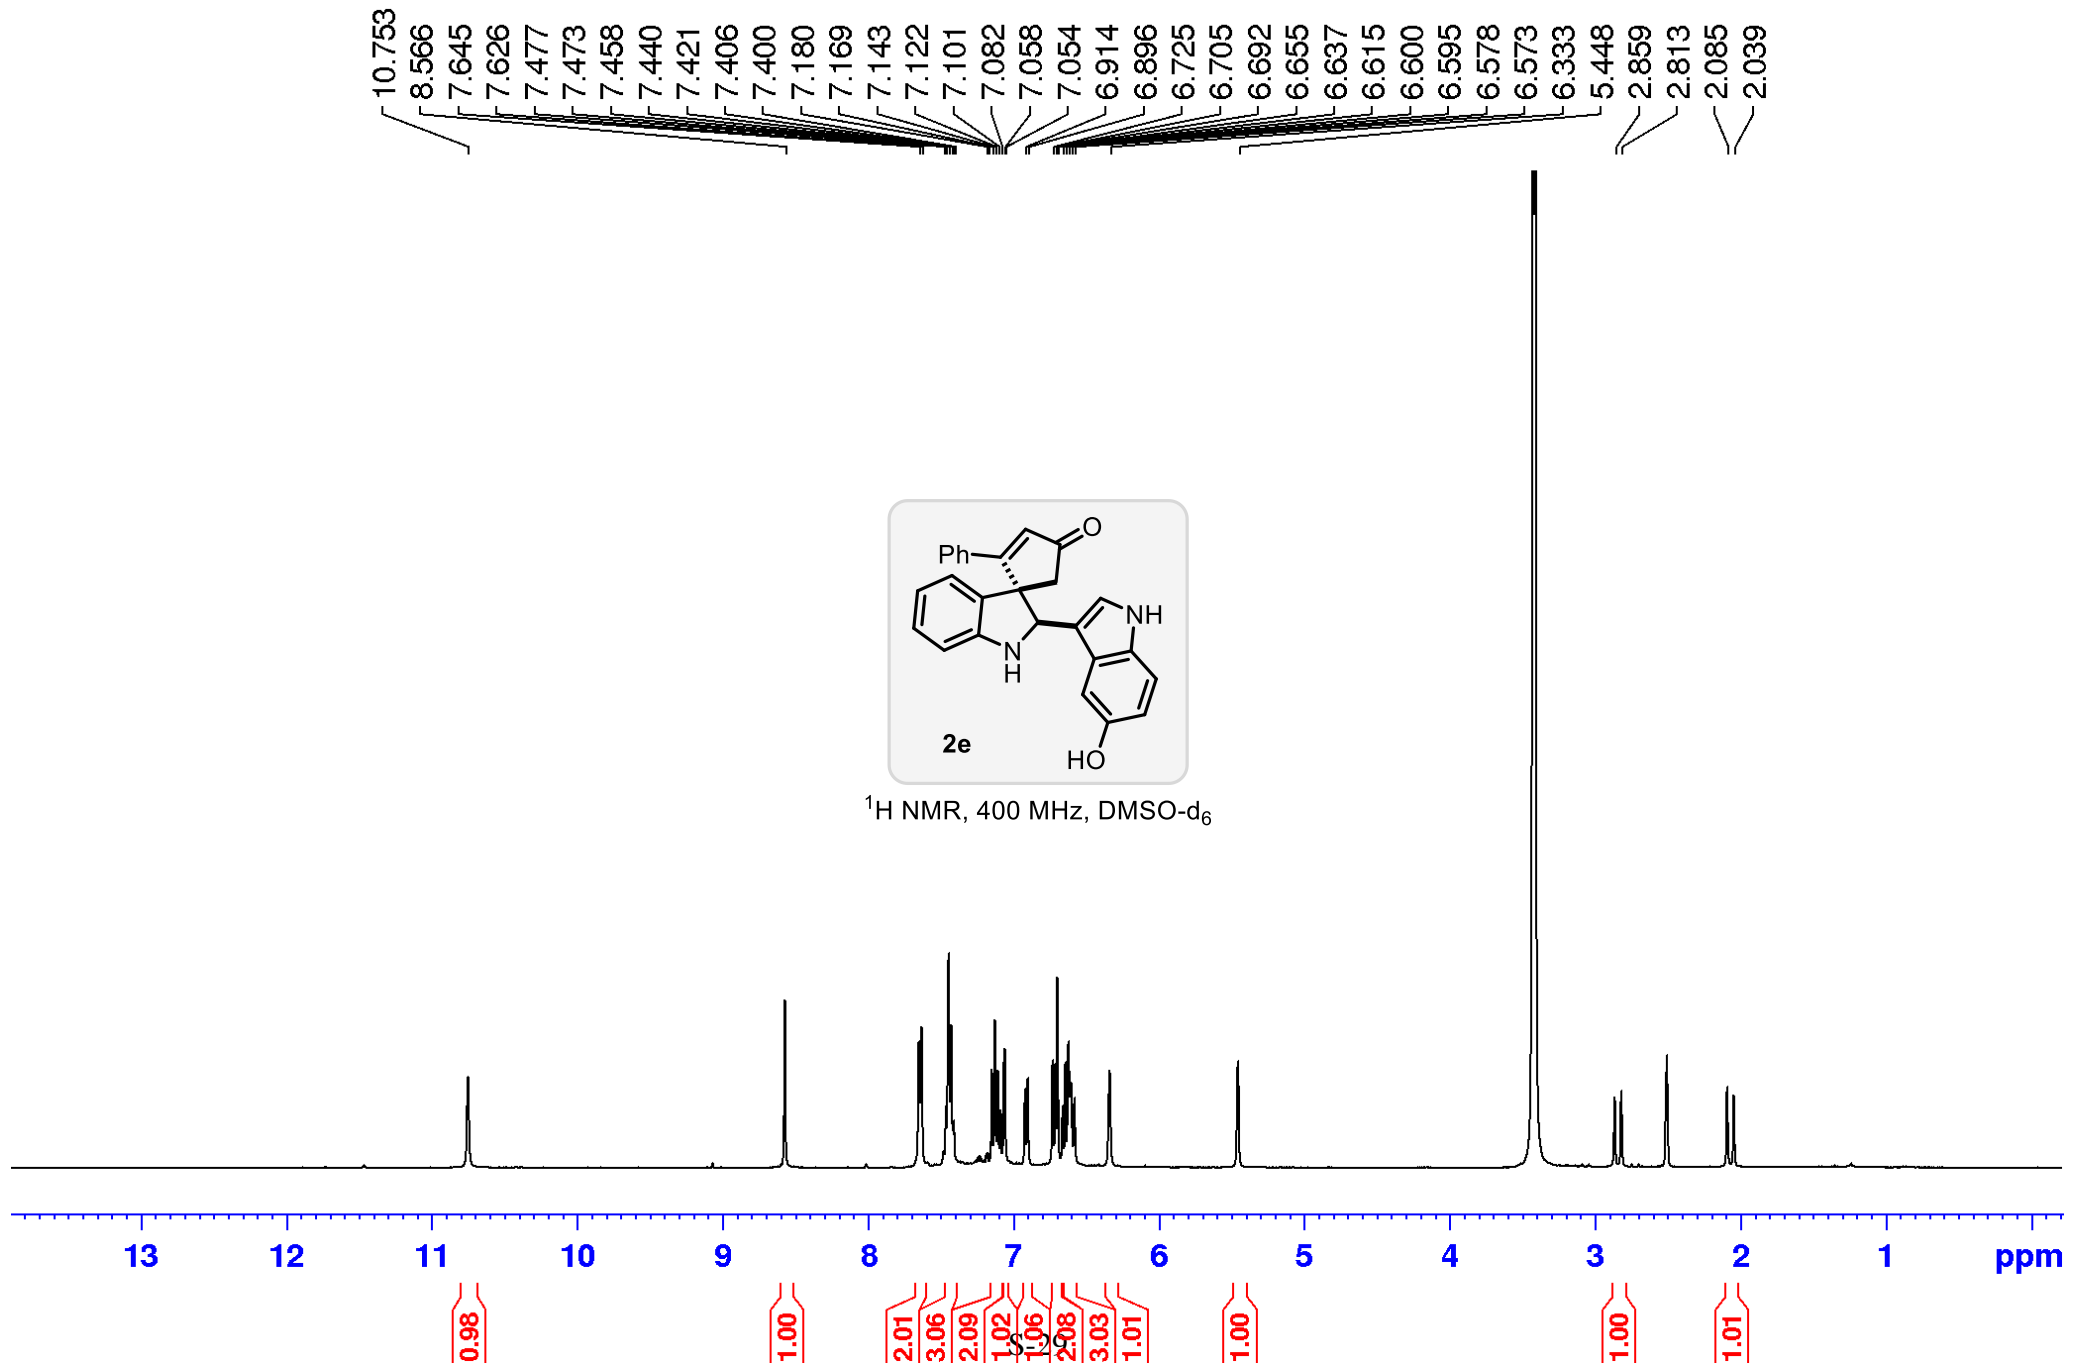

— 205.965

— 174.767

150.752  
150.281  
133.562  
133.538  
131.195  
130.468  
130.404  
129.140  
128.848  
128.516  
127.228  
124.609  
122.821  
118.094  
111.988  
111.770  
111.630  
109.005  
103.723

— 63.862

— 60.501

— 48.985

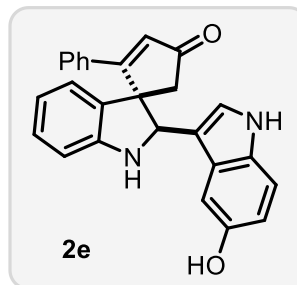

$^{13}\text{C}\{^1\text{H}\}$  NMR, 100 MHz, DMSO- $d_6$

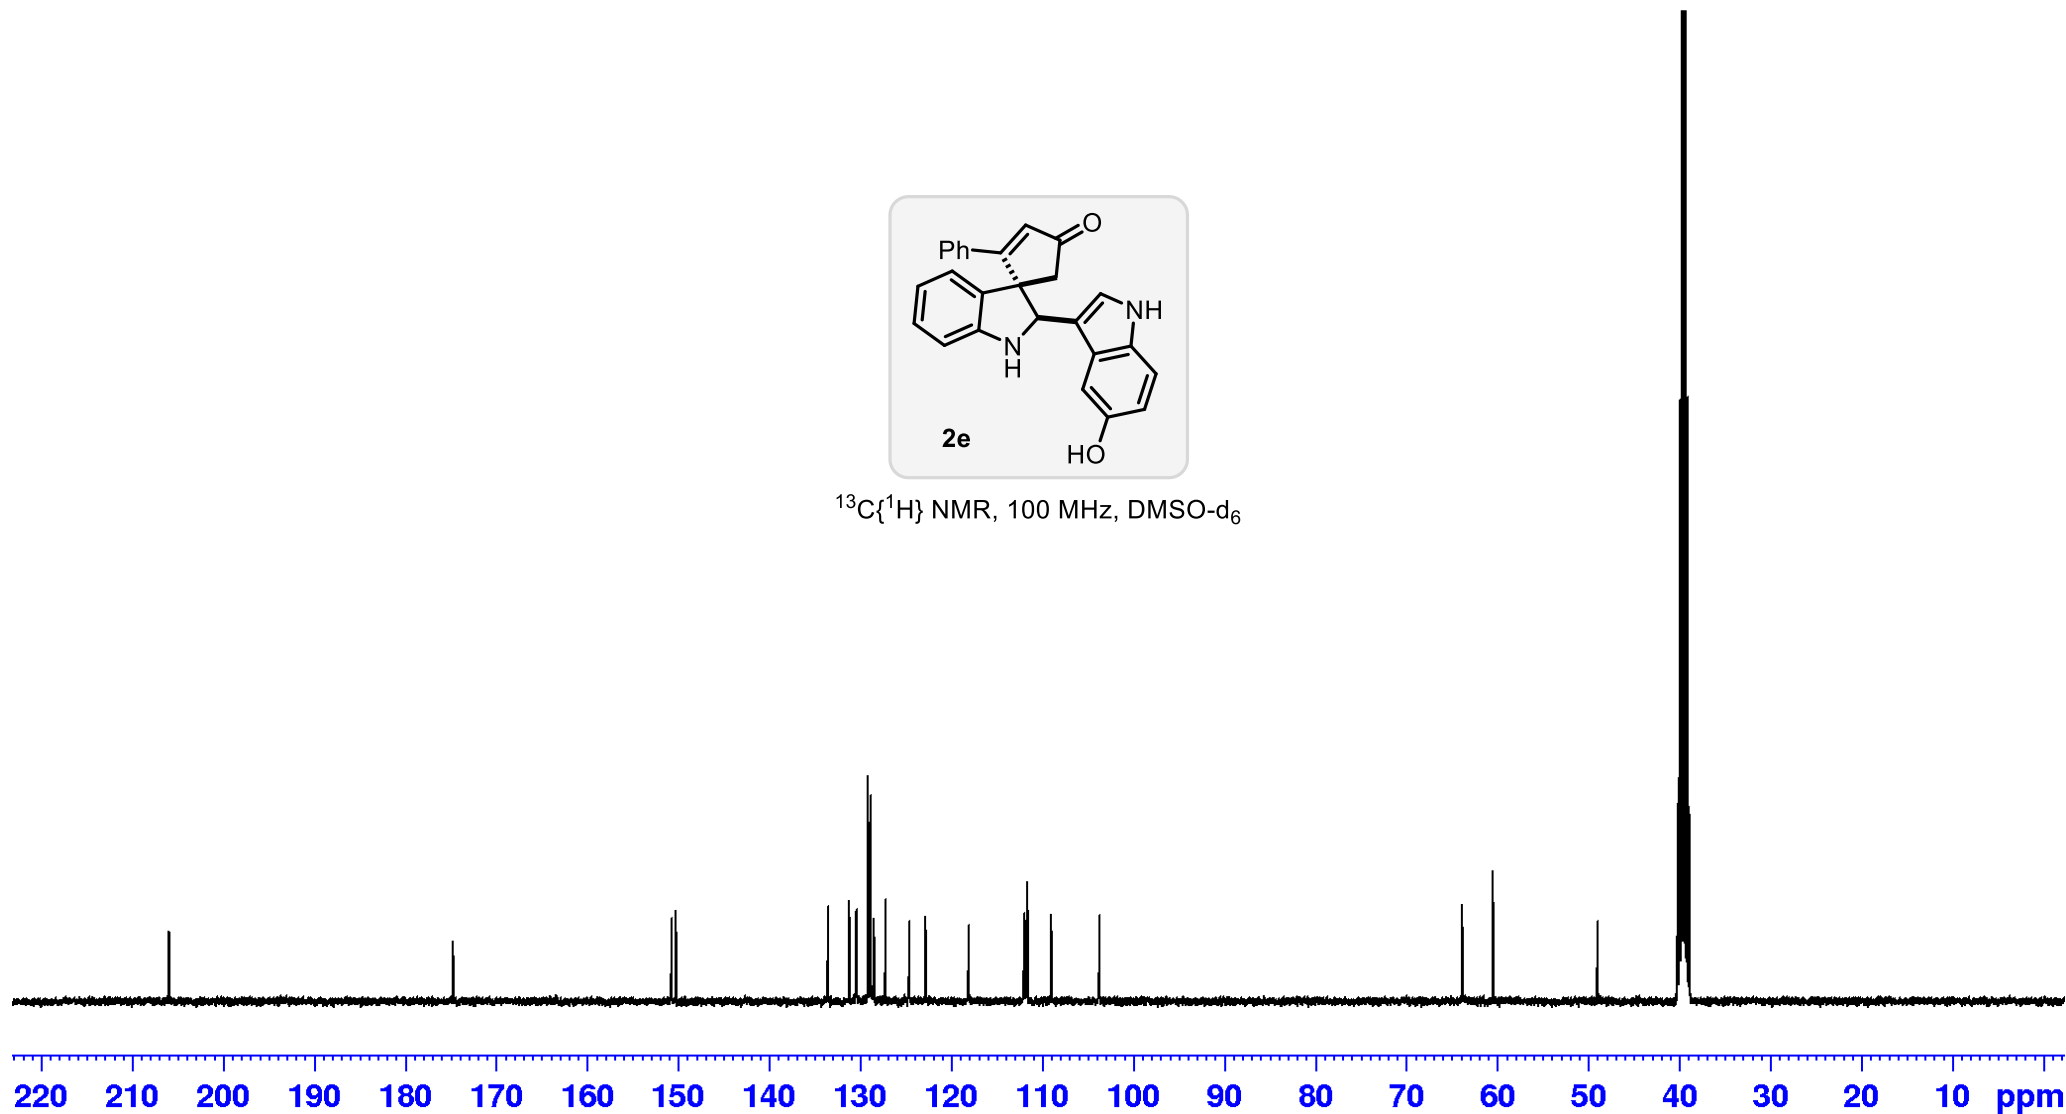

S-30

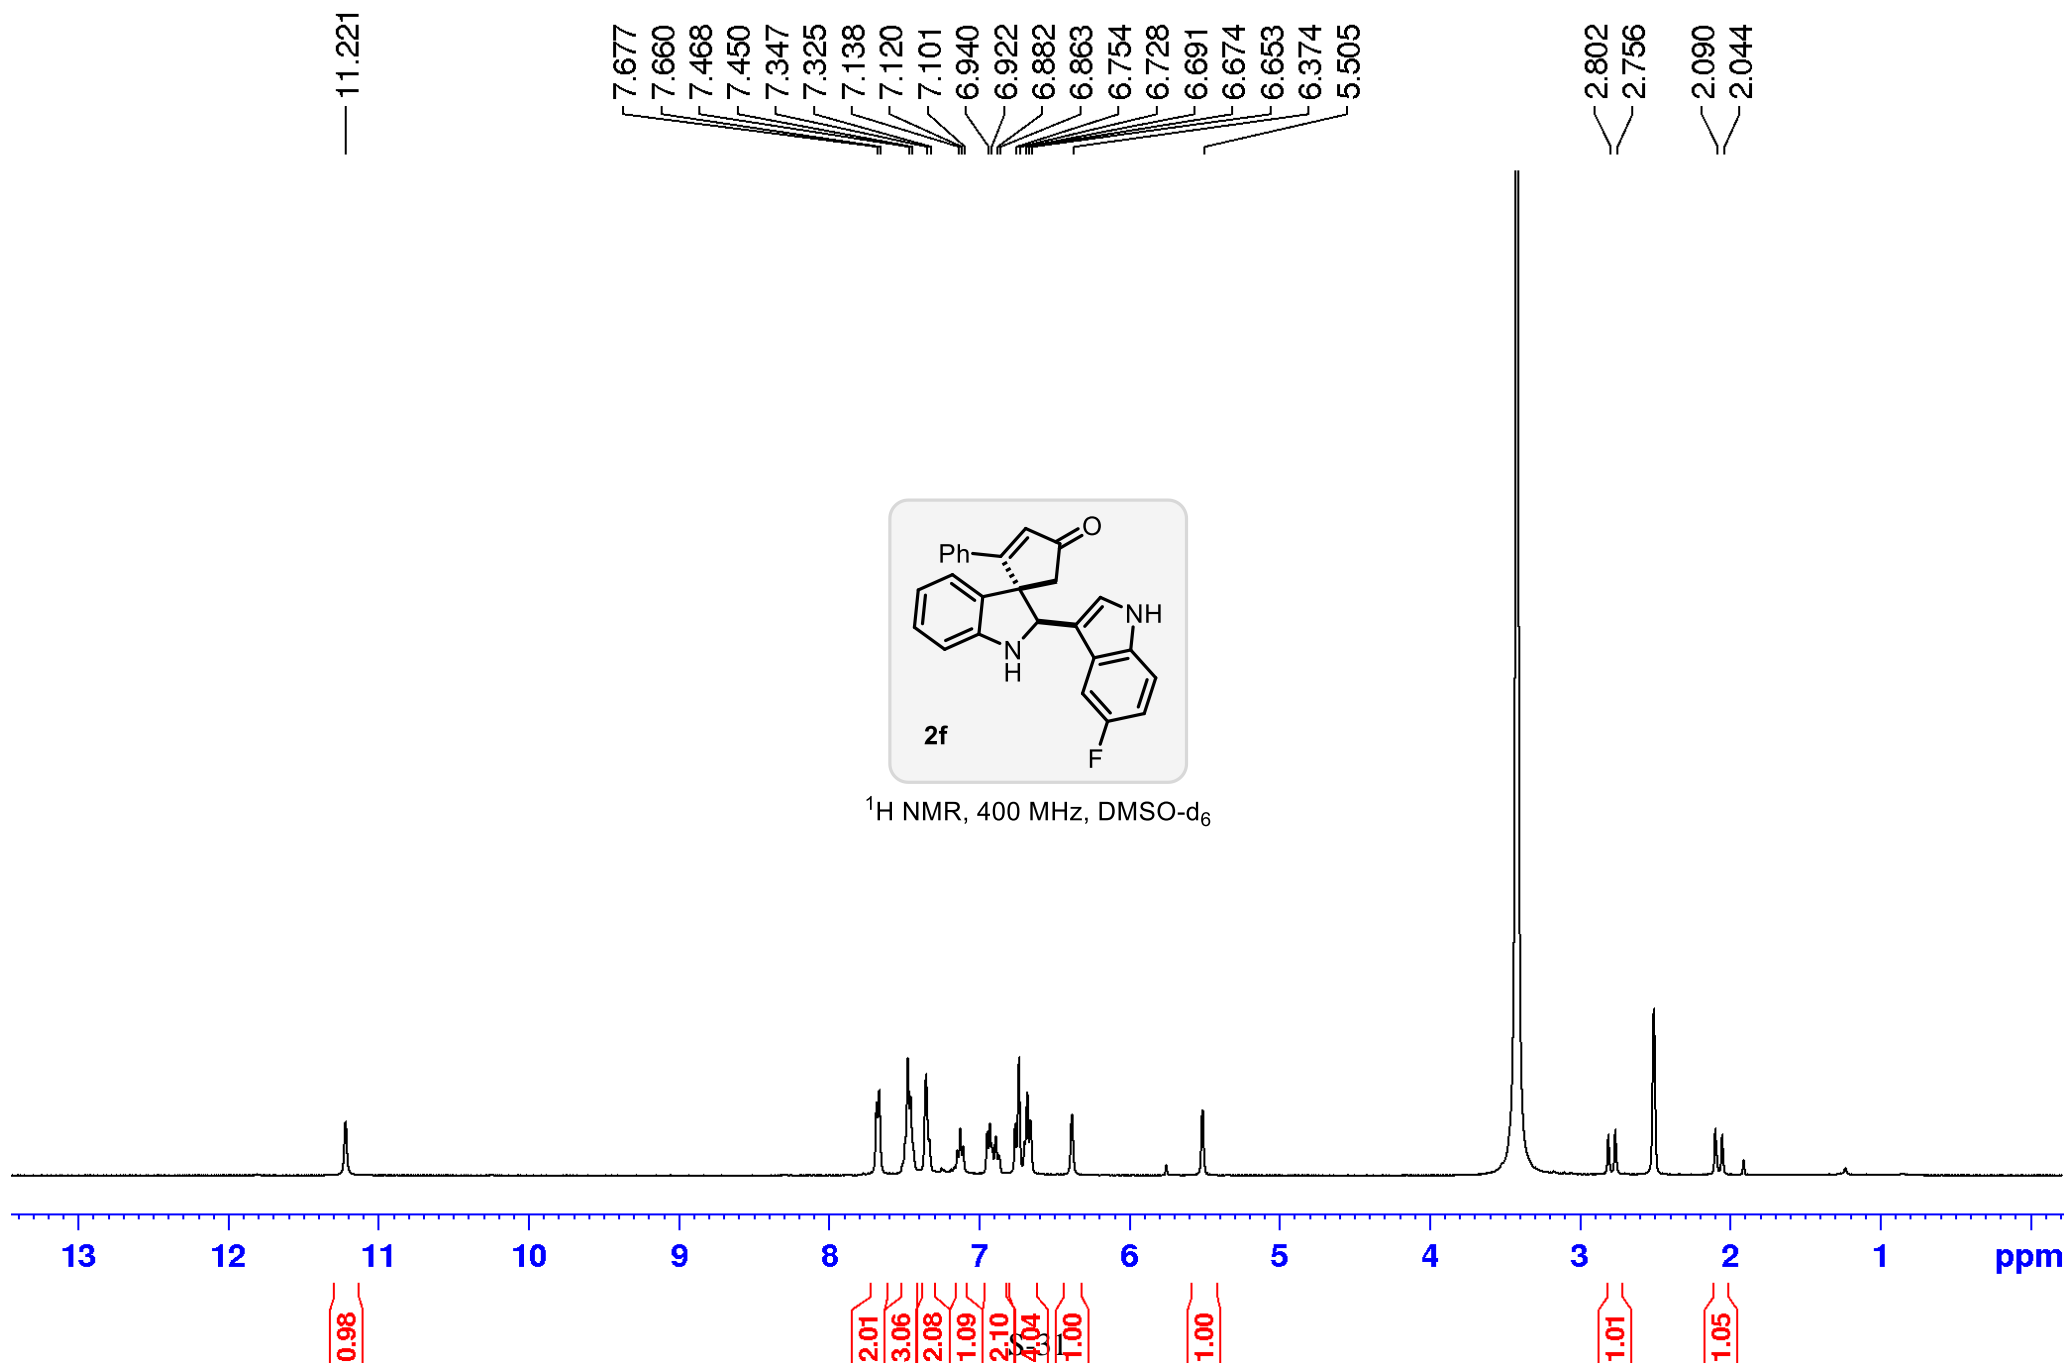

-124.817  
-124.828  
-124.842  
-124.852  
-124.878

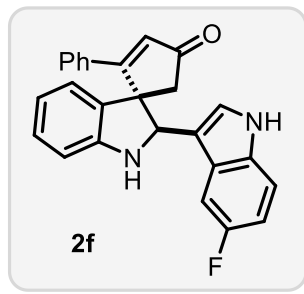

<sup>19</sup>F NMR, 256 MHz, DMSO-d<sub>6</sub>

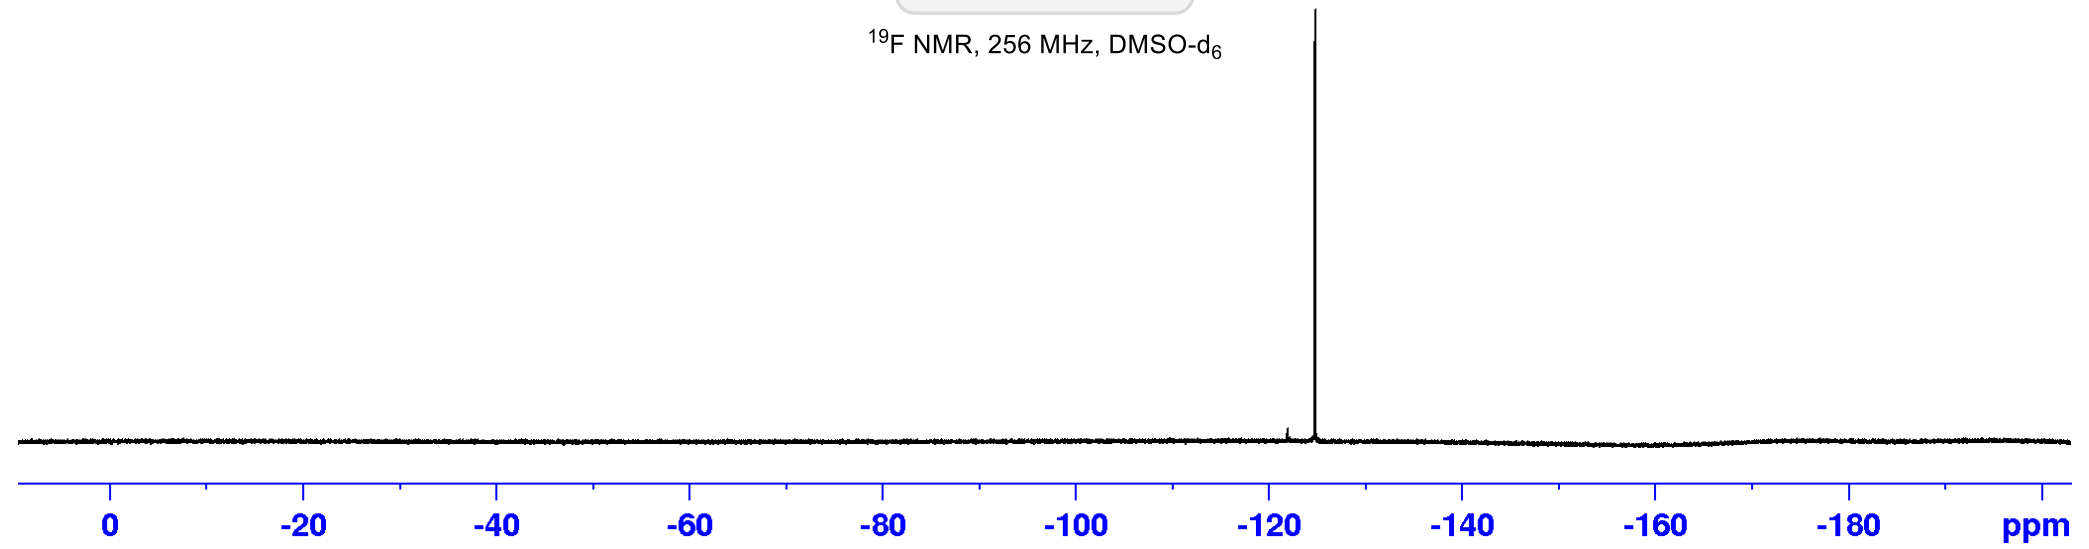



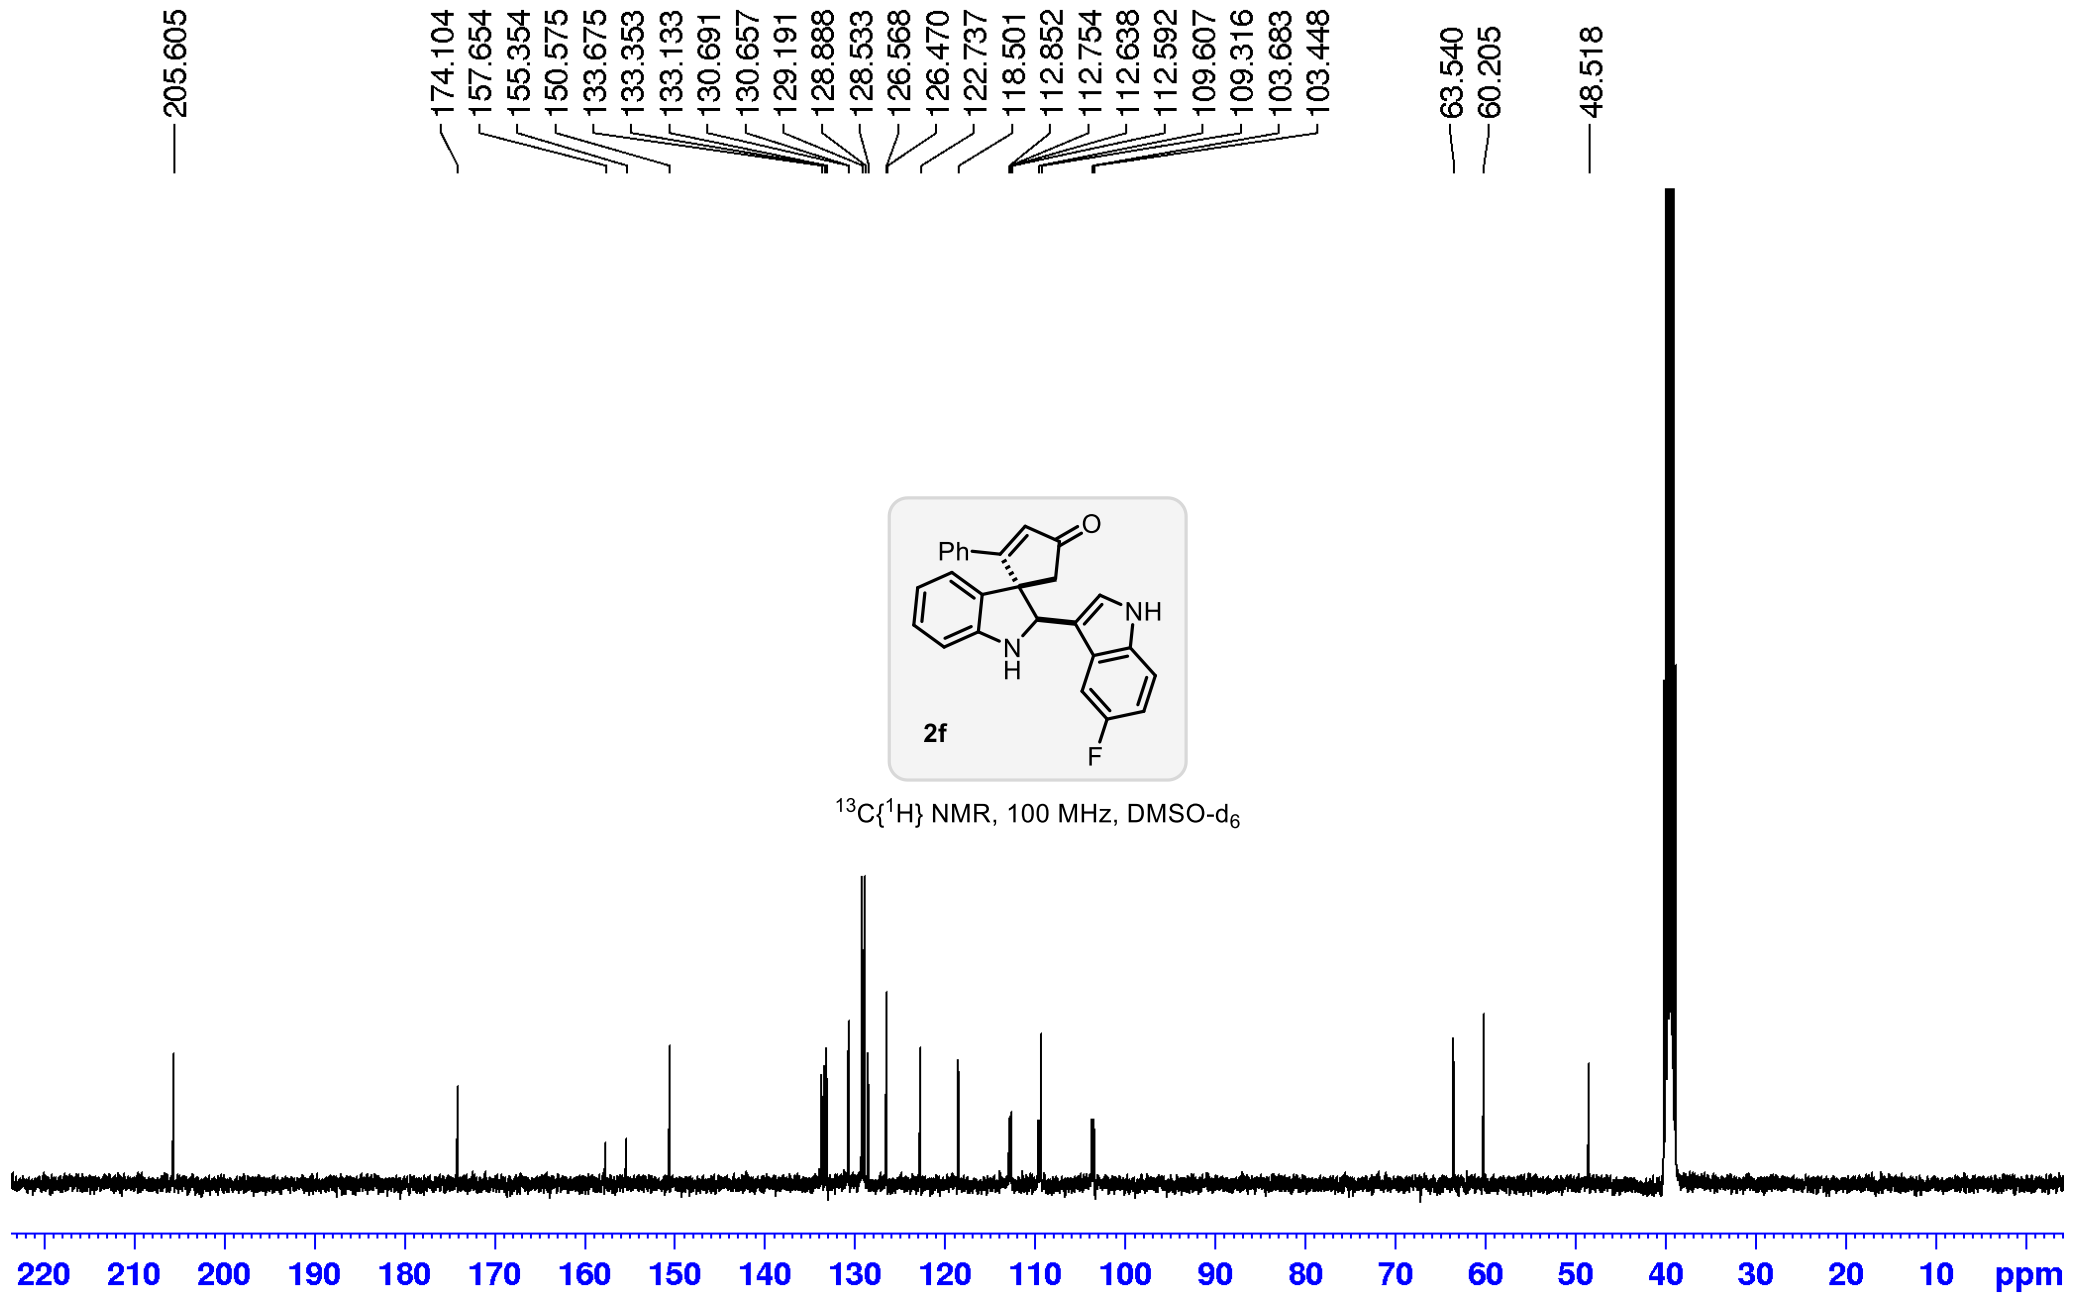

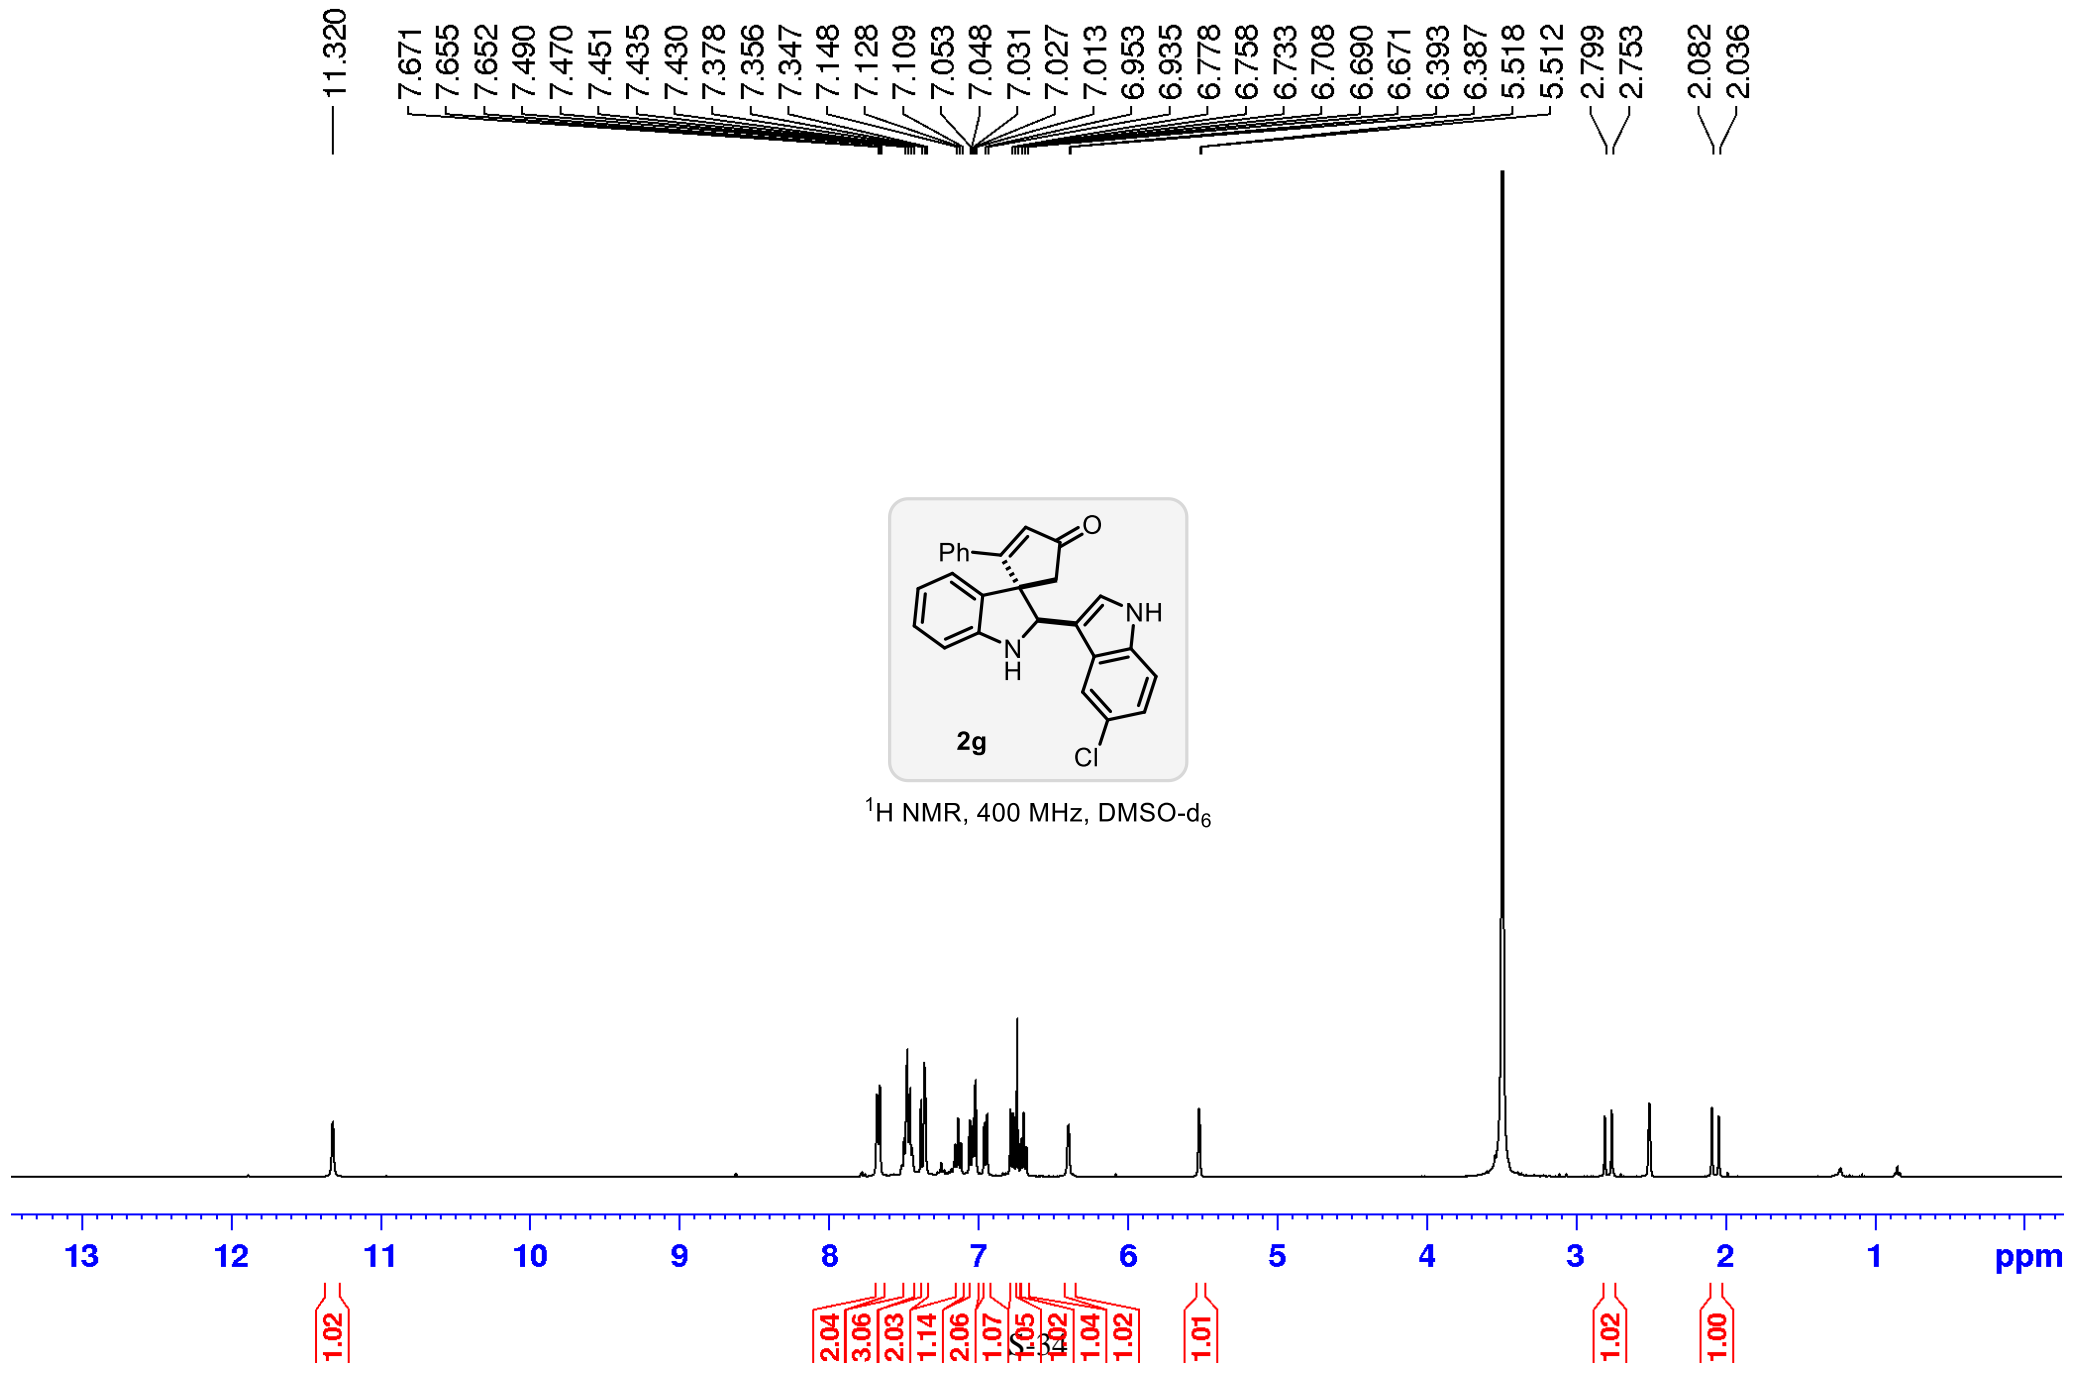

— 205.615

— 174.033

150.562  
134.933  
133.797  
133.411  
130.931  
130.751  
129.311  
128.965  
128.600  
127.553  
126.248  
123.362  
122.783  
121.305  
118.714  
118.296  
113.409  
112.140  
109.535

— 63.554

— 60.327

— 48.471

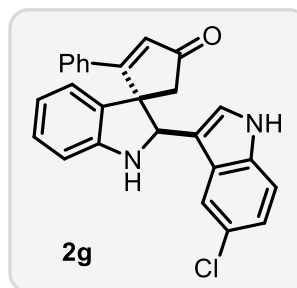

$^{13}\text{C}\{^1\text{H}\}$  NMR, 100 MHz, DMSO- $\text{d}_6$

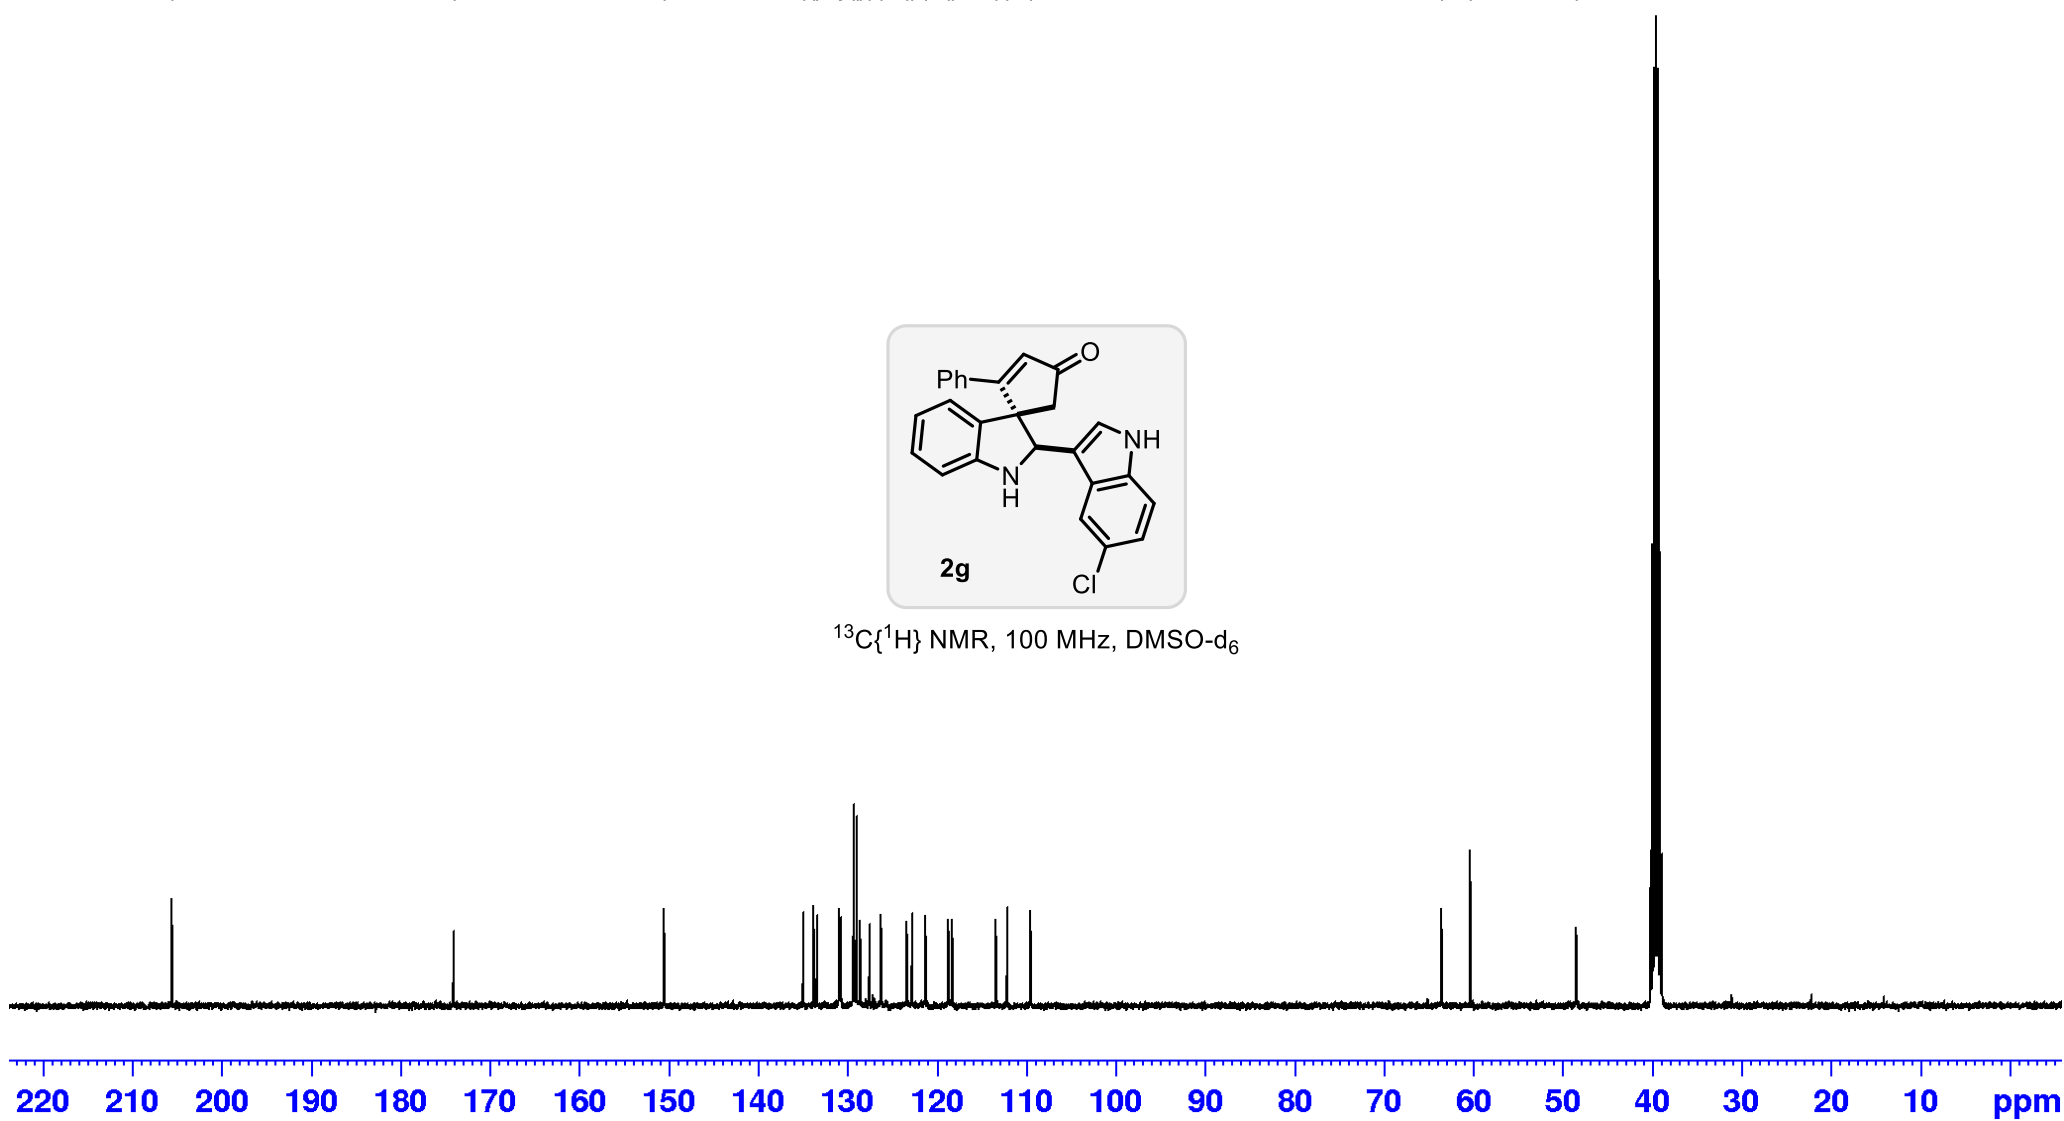

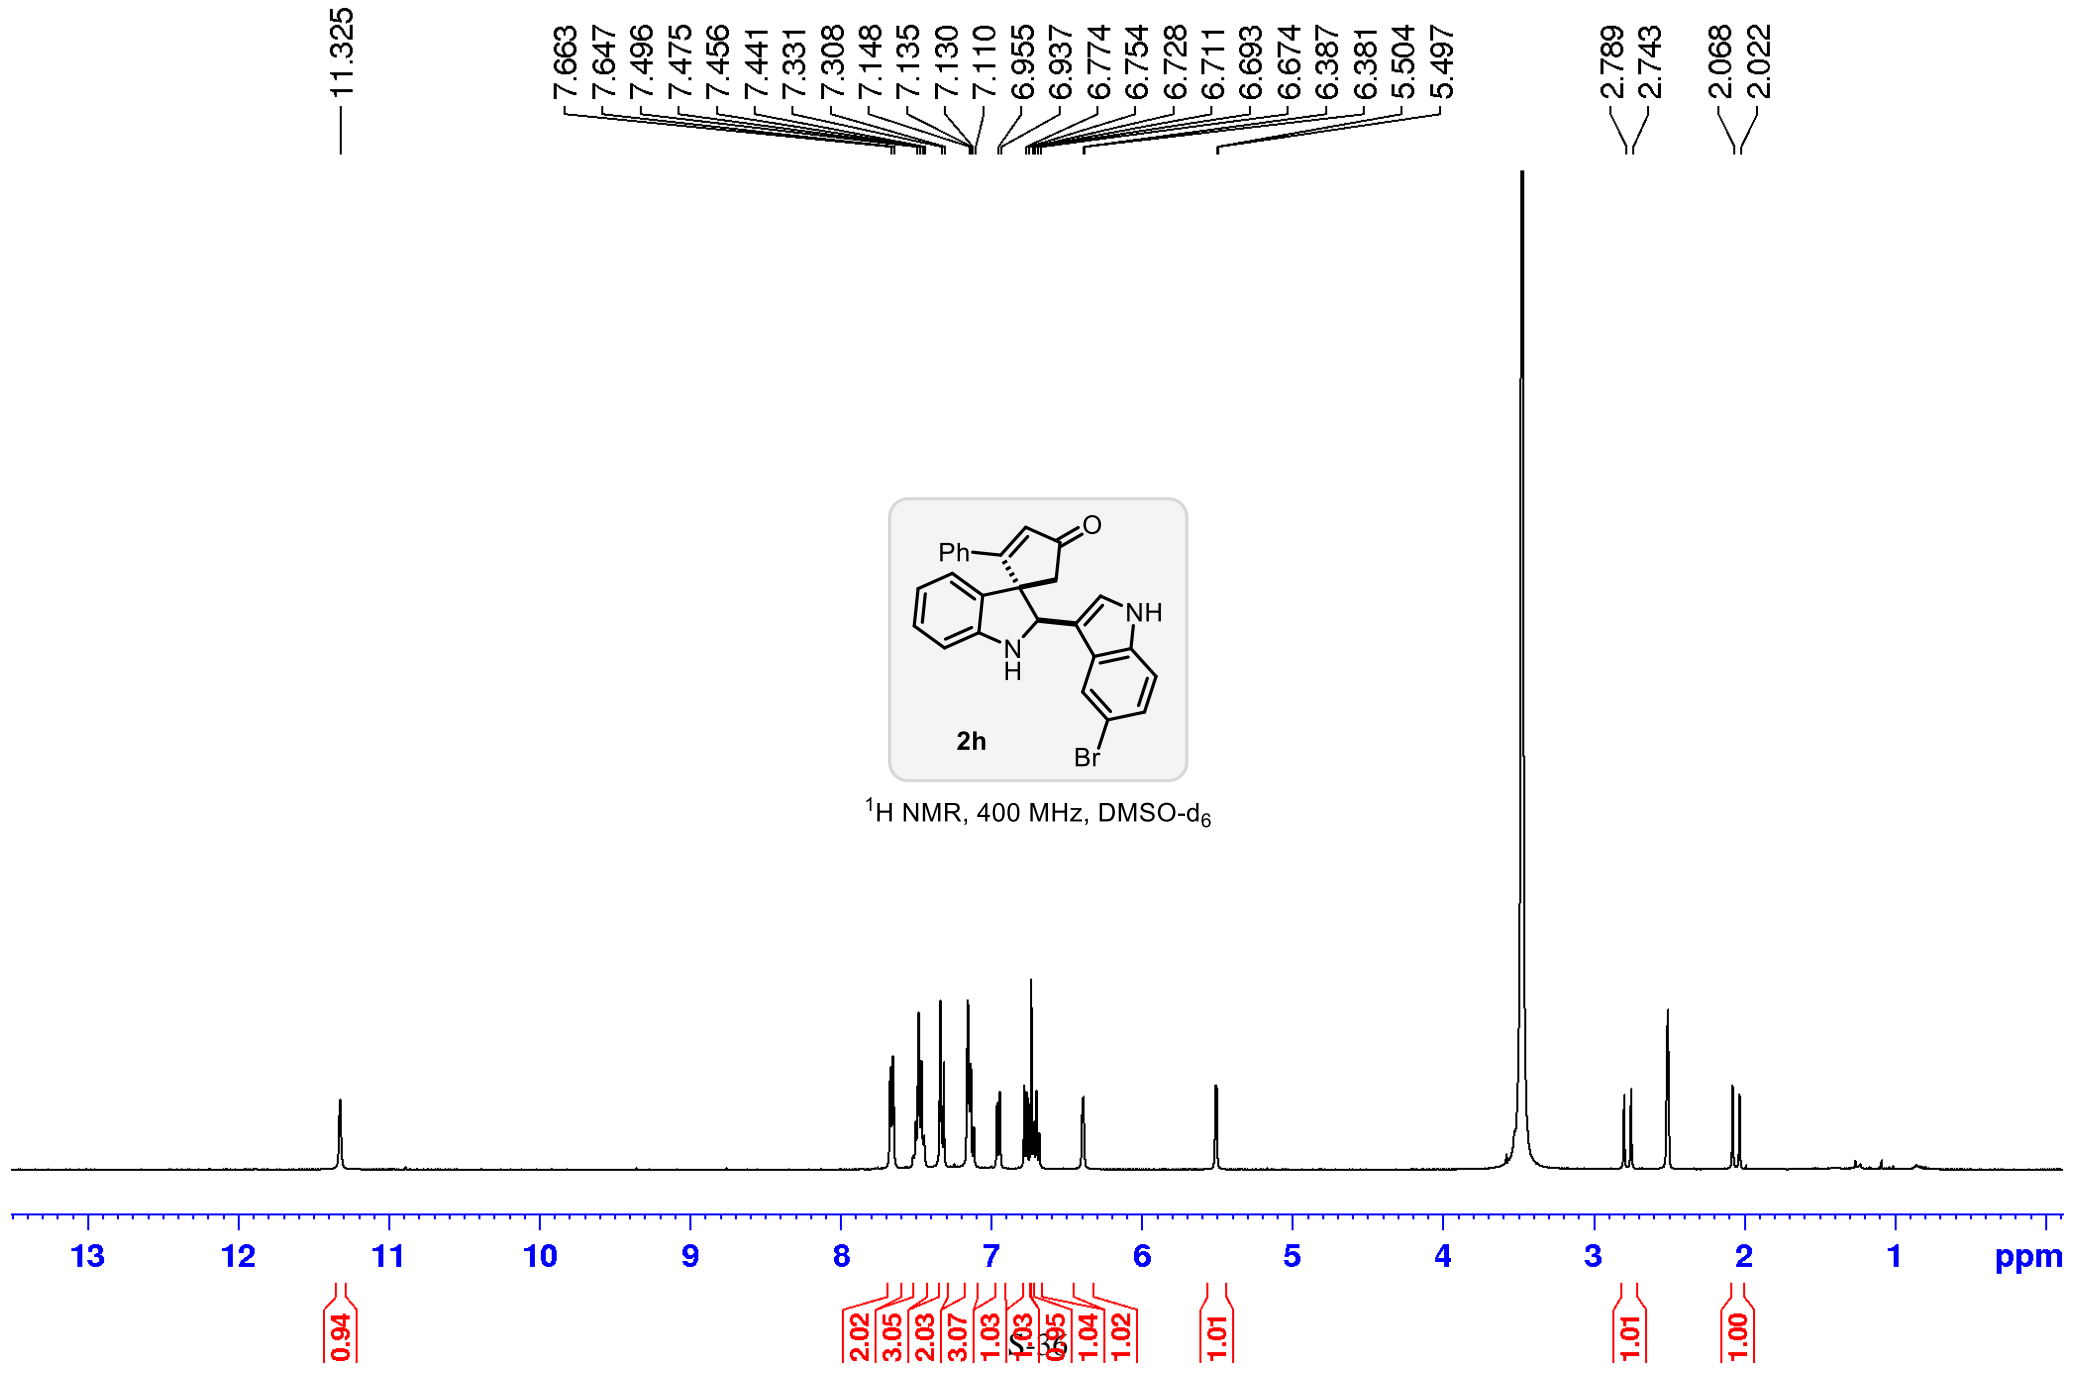

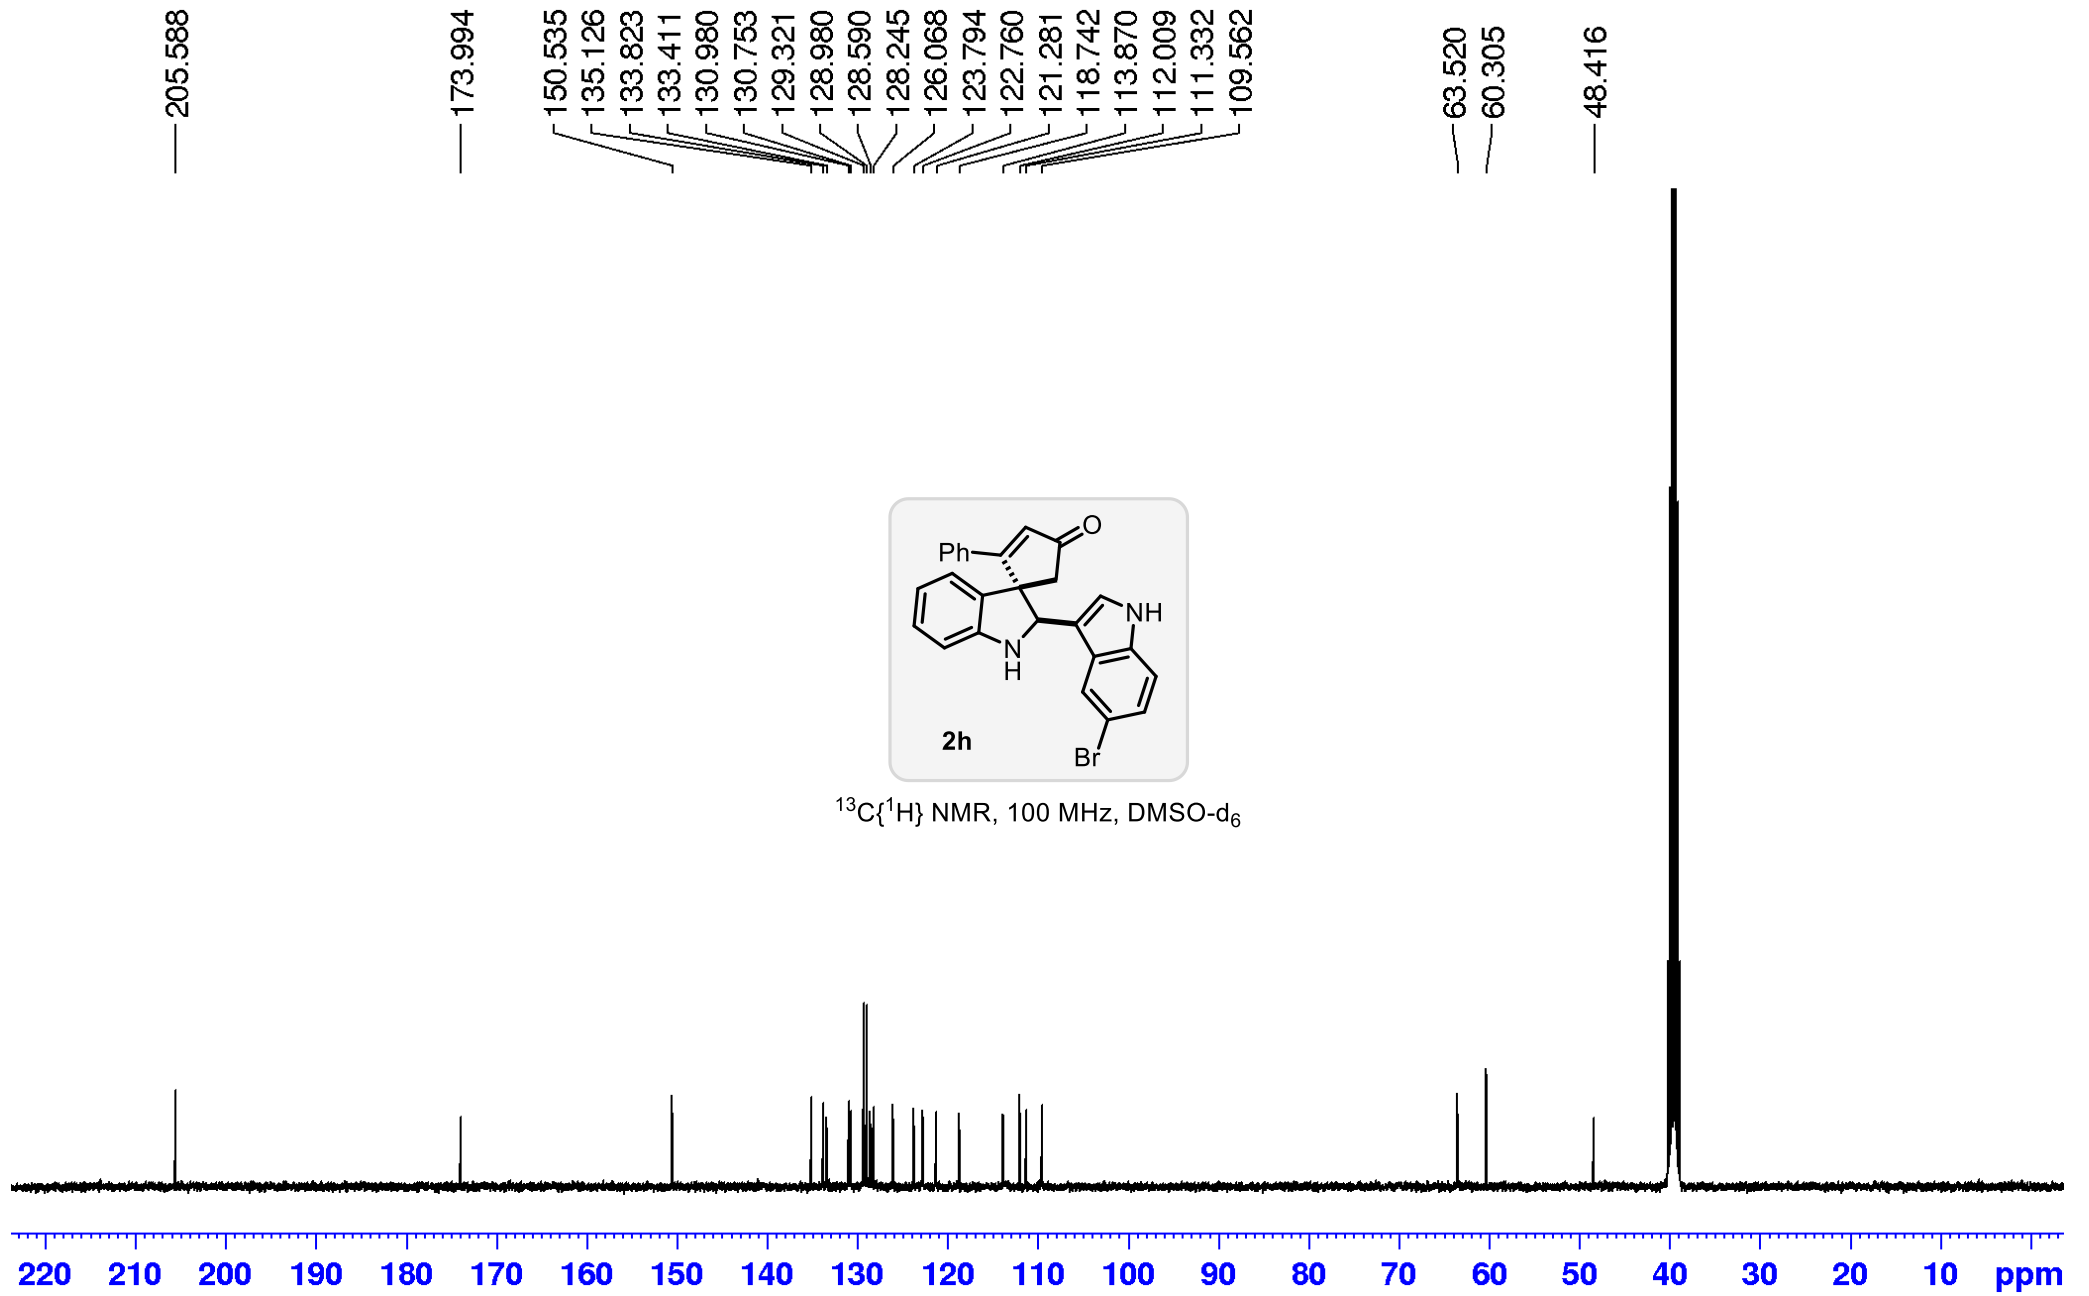

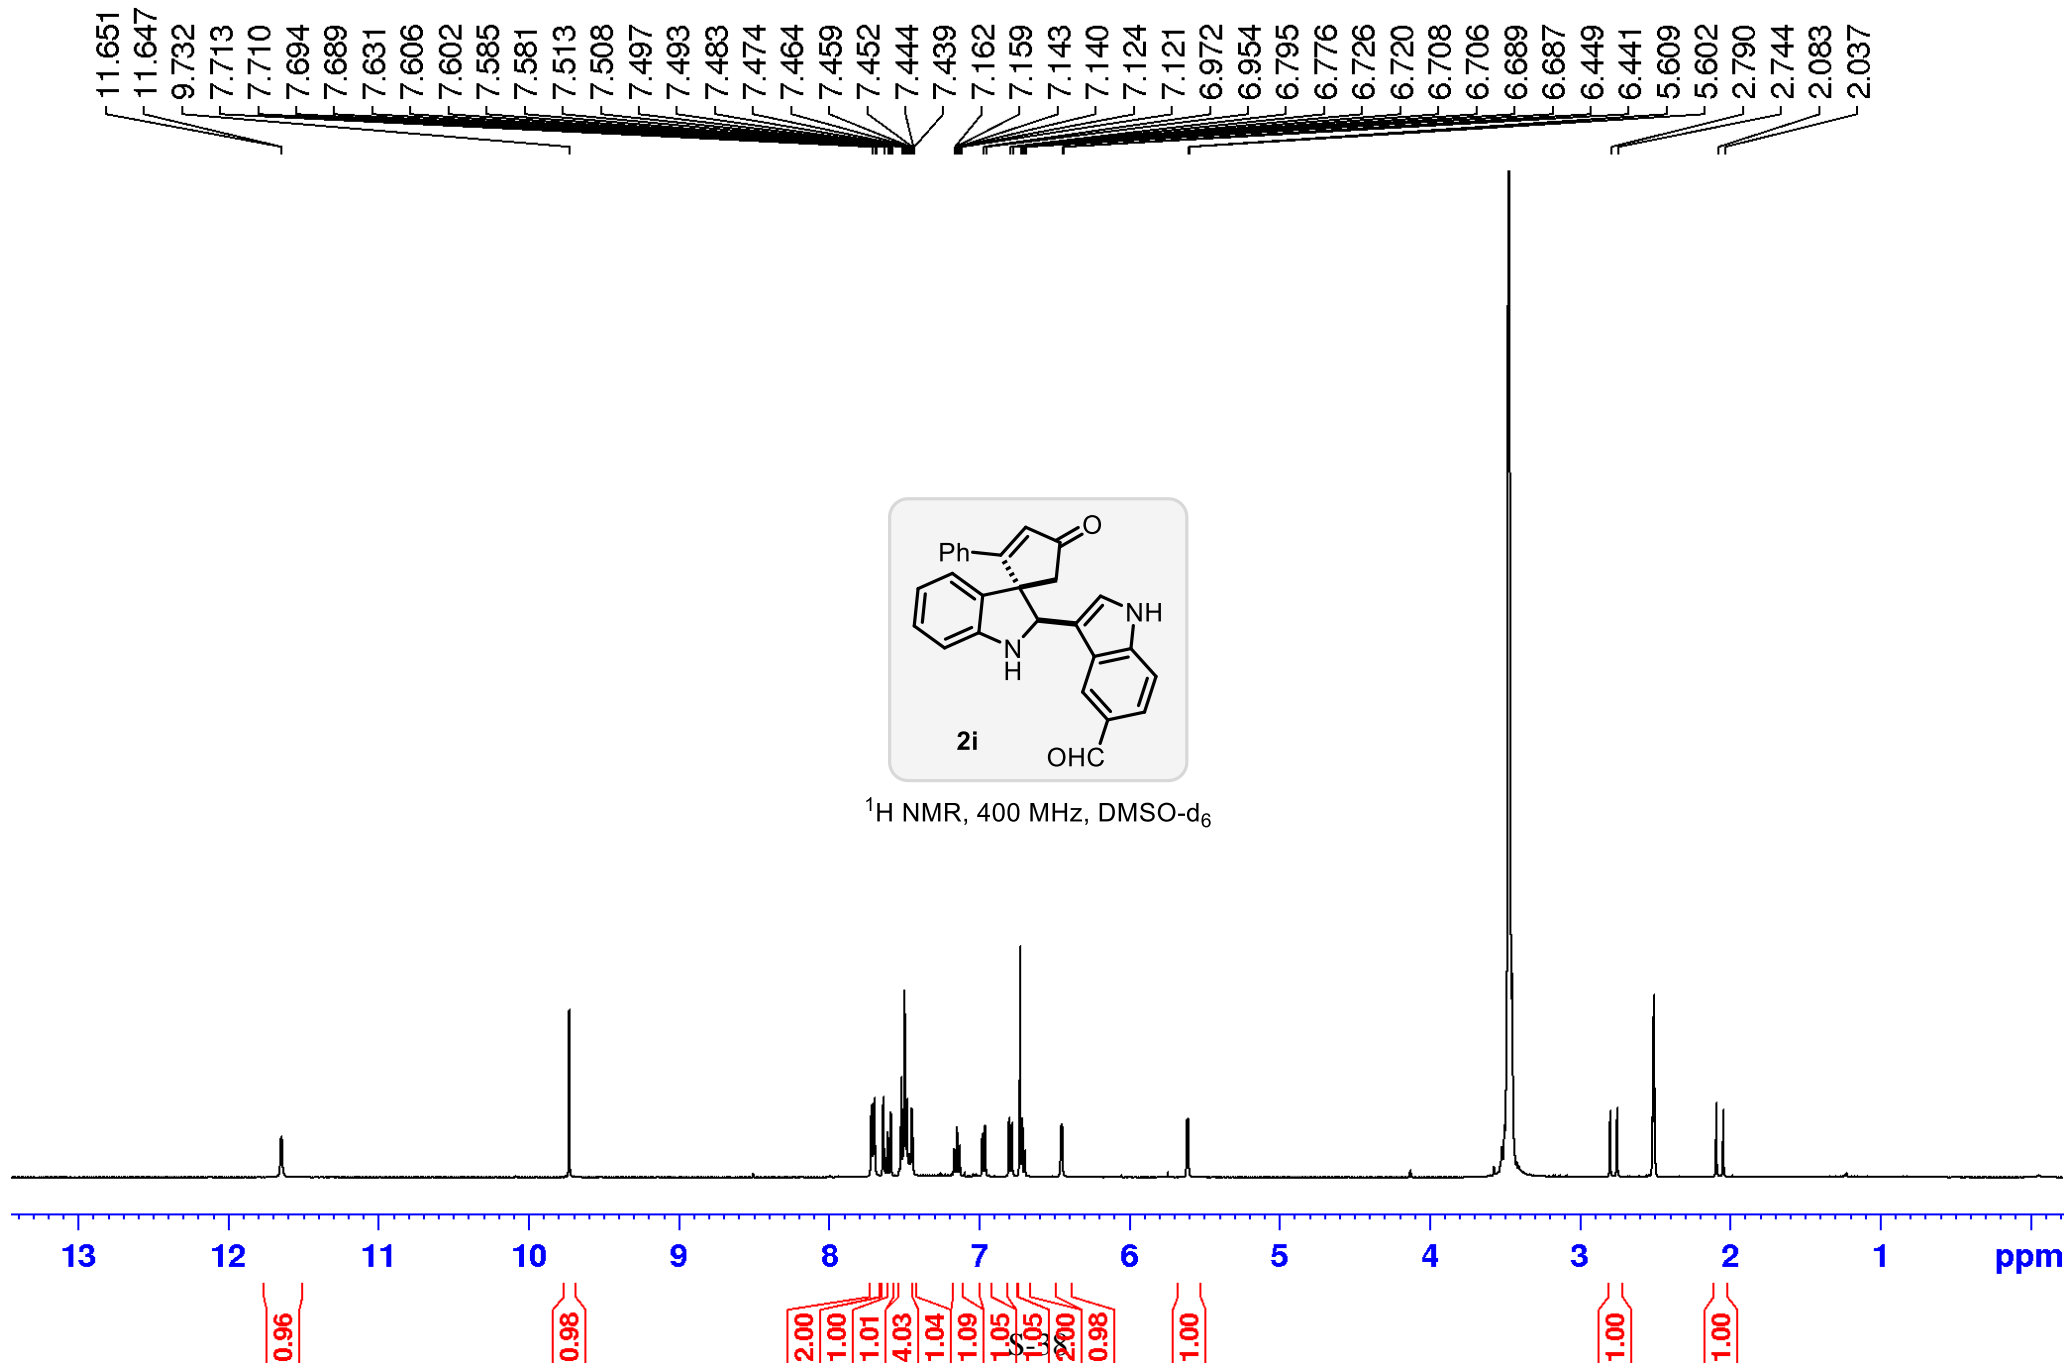

—205.487

—192.125

—173.902

150.514  
139.925  
133.816  
133.419  
131.089  
130.766  
129.420  
129.004  
128.594  
128.516  
126.615  
126.251  
124.644  
122.774  
121.374  
118.803  
114.540  
112.598  
109.645

—63.485

—60.330

—48.454

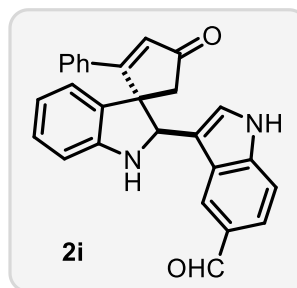

$^{13}\text{C}\{^1\text{H}\}$  NMR, 100 MHz, DMSO- $d_6$

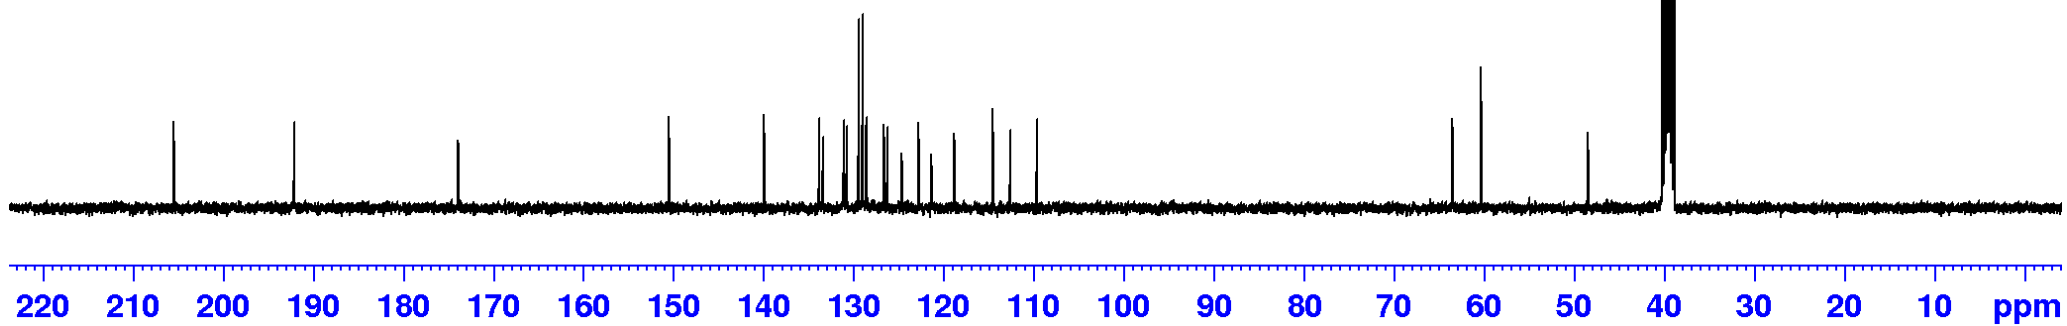

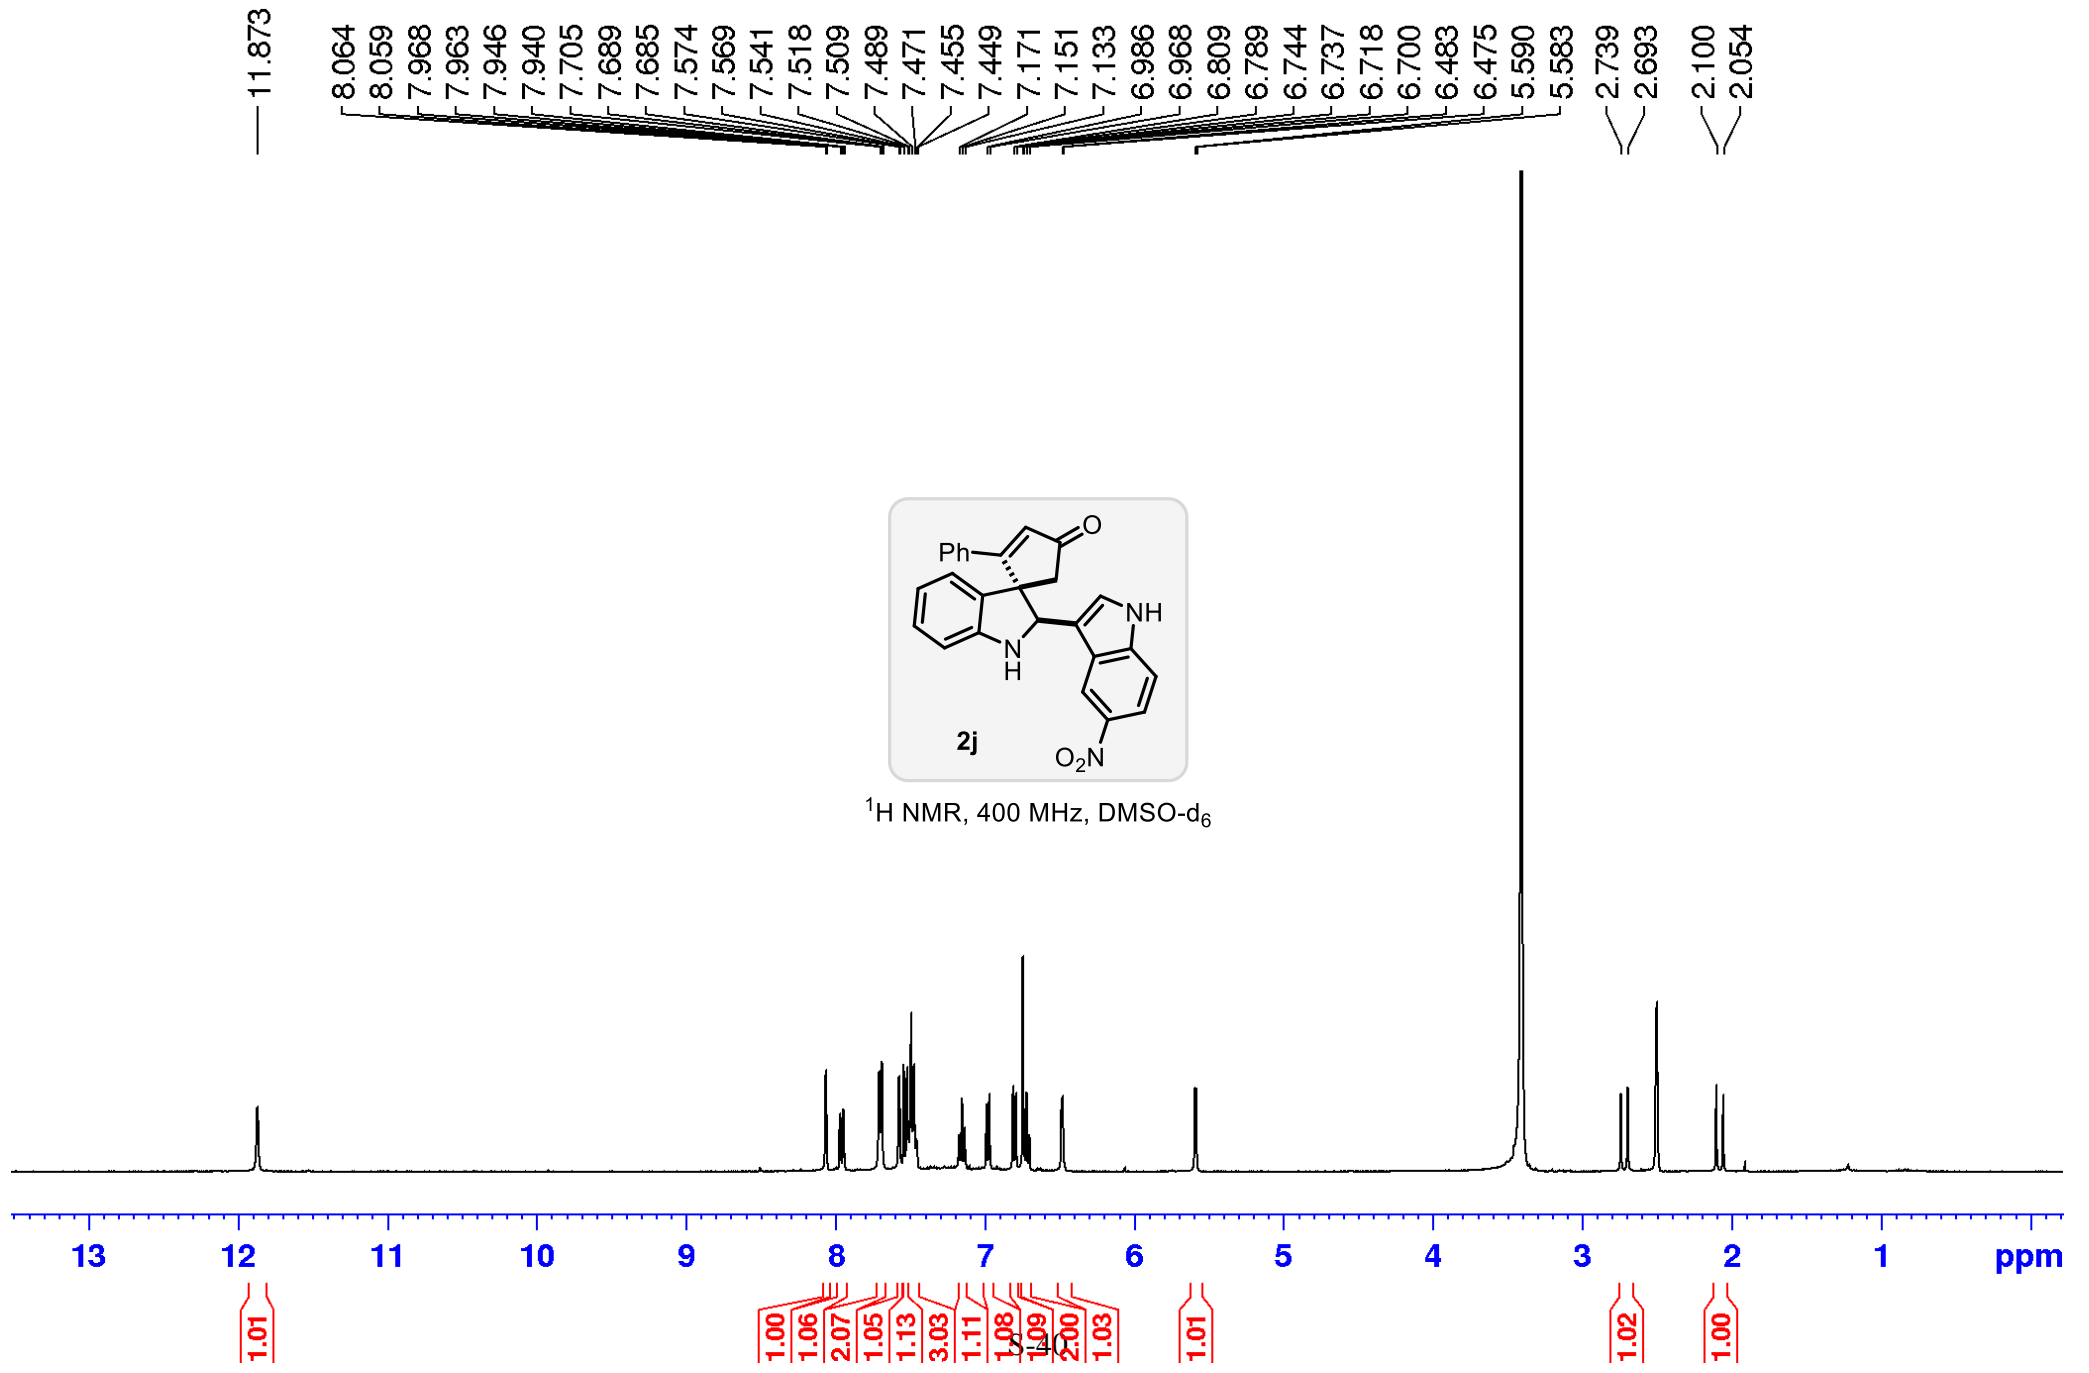



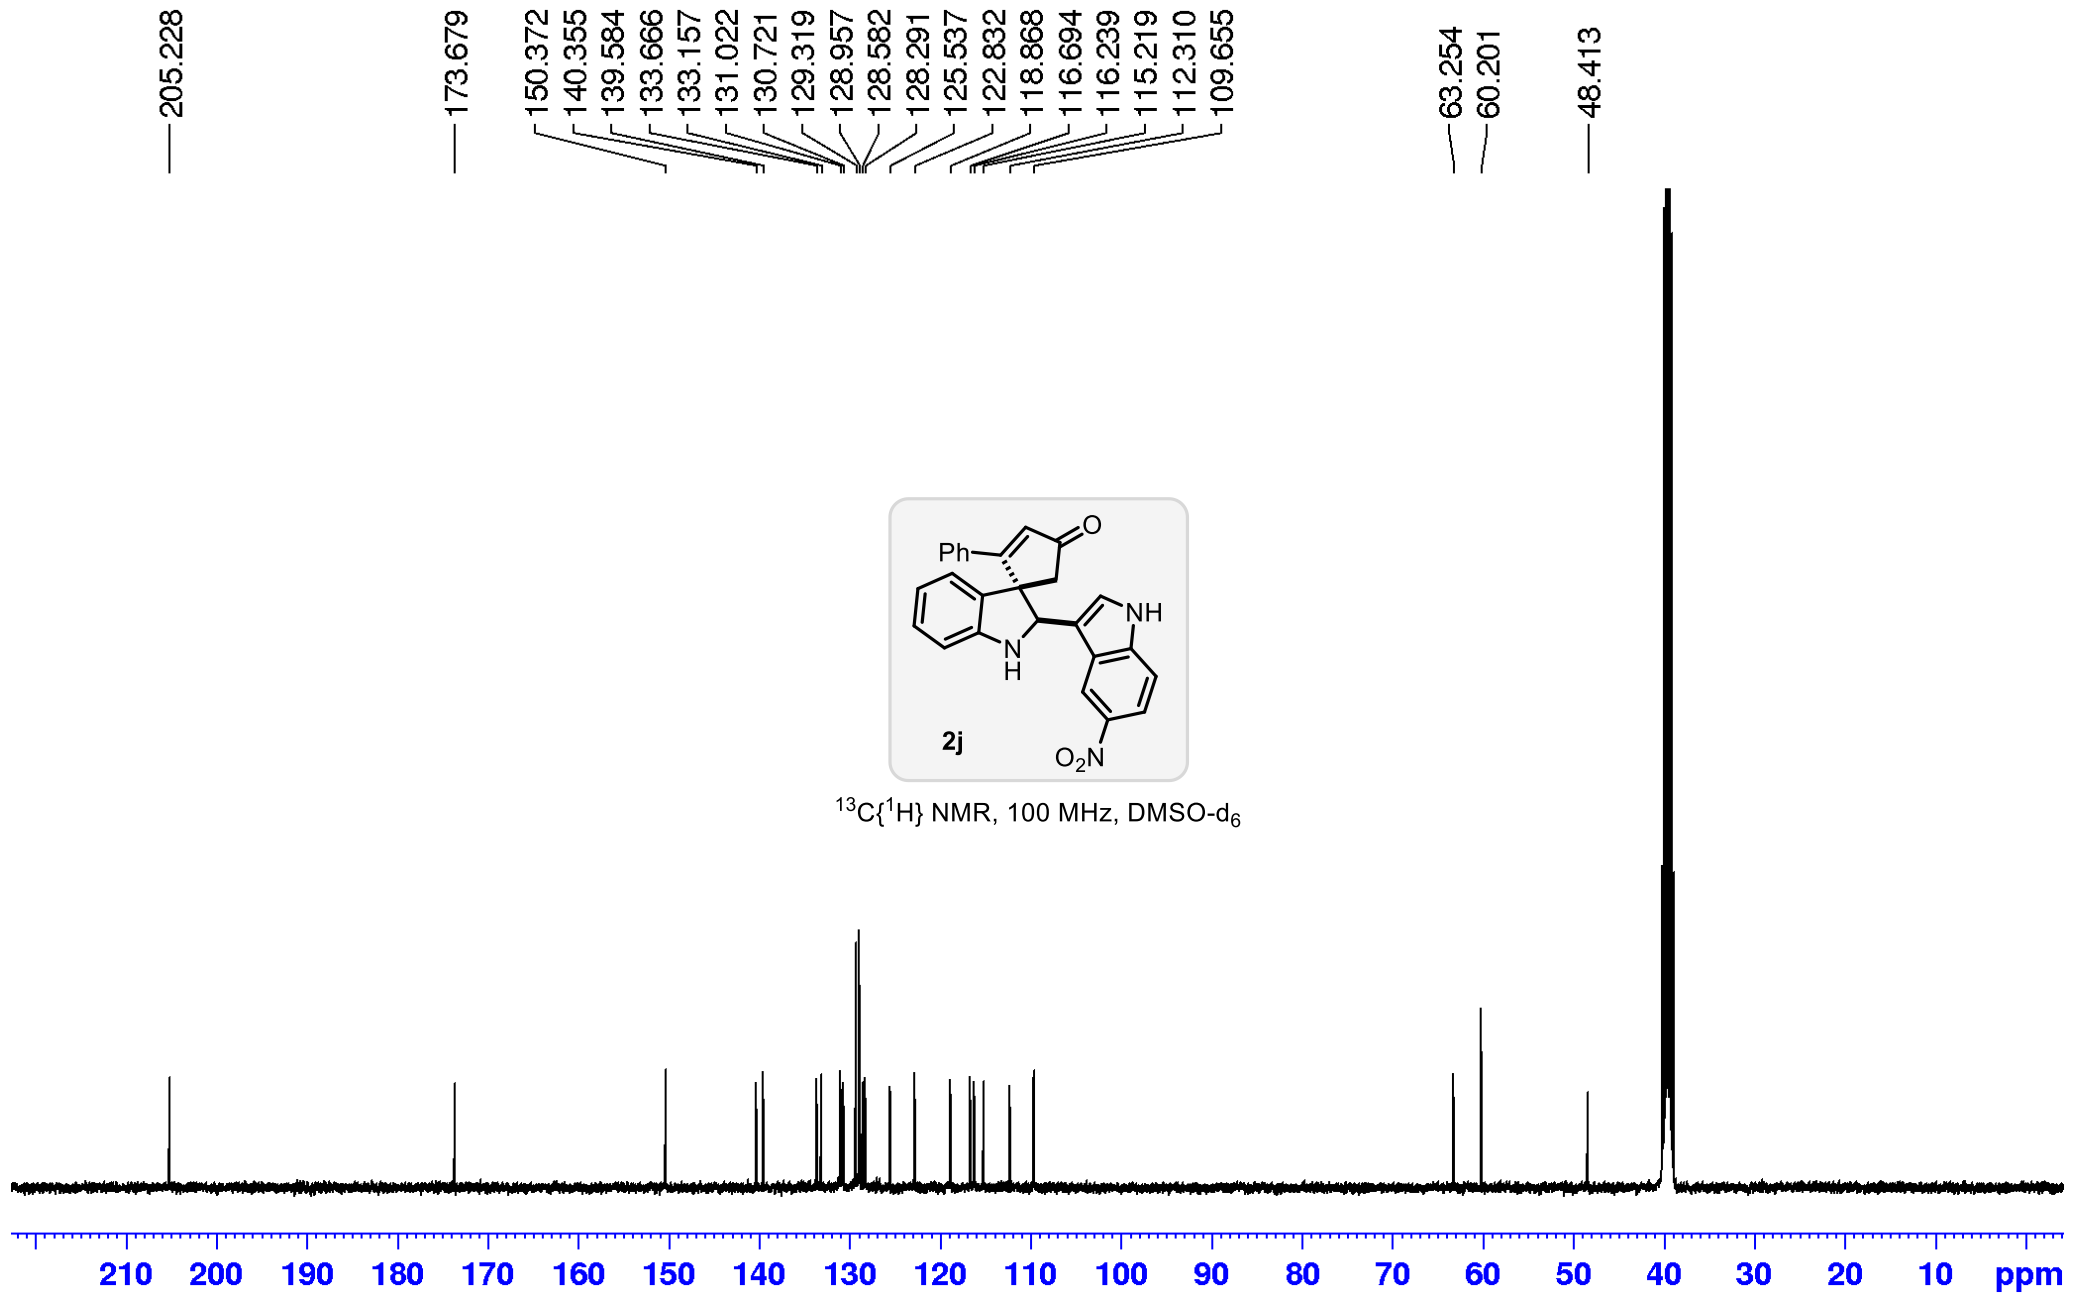

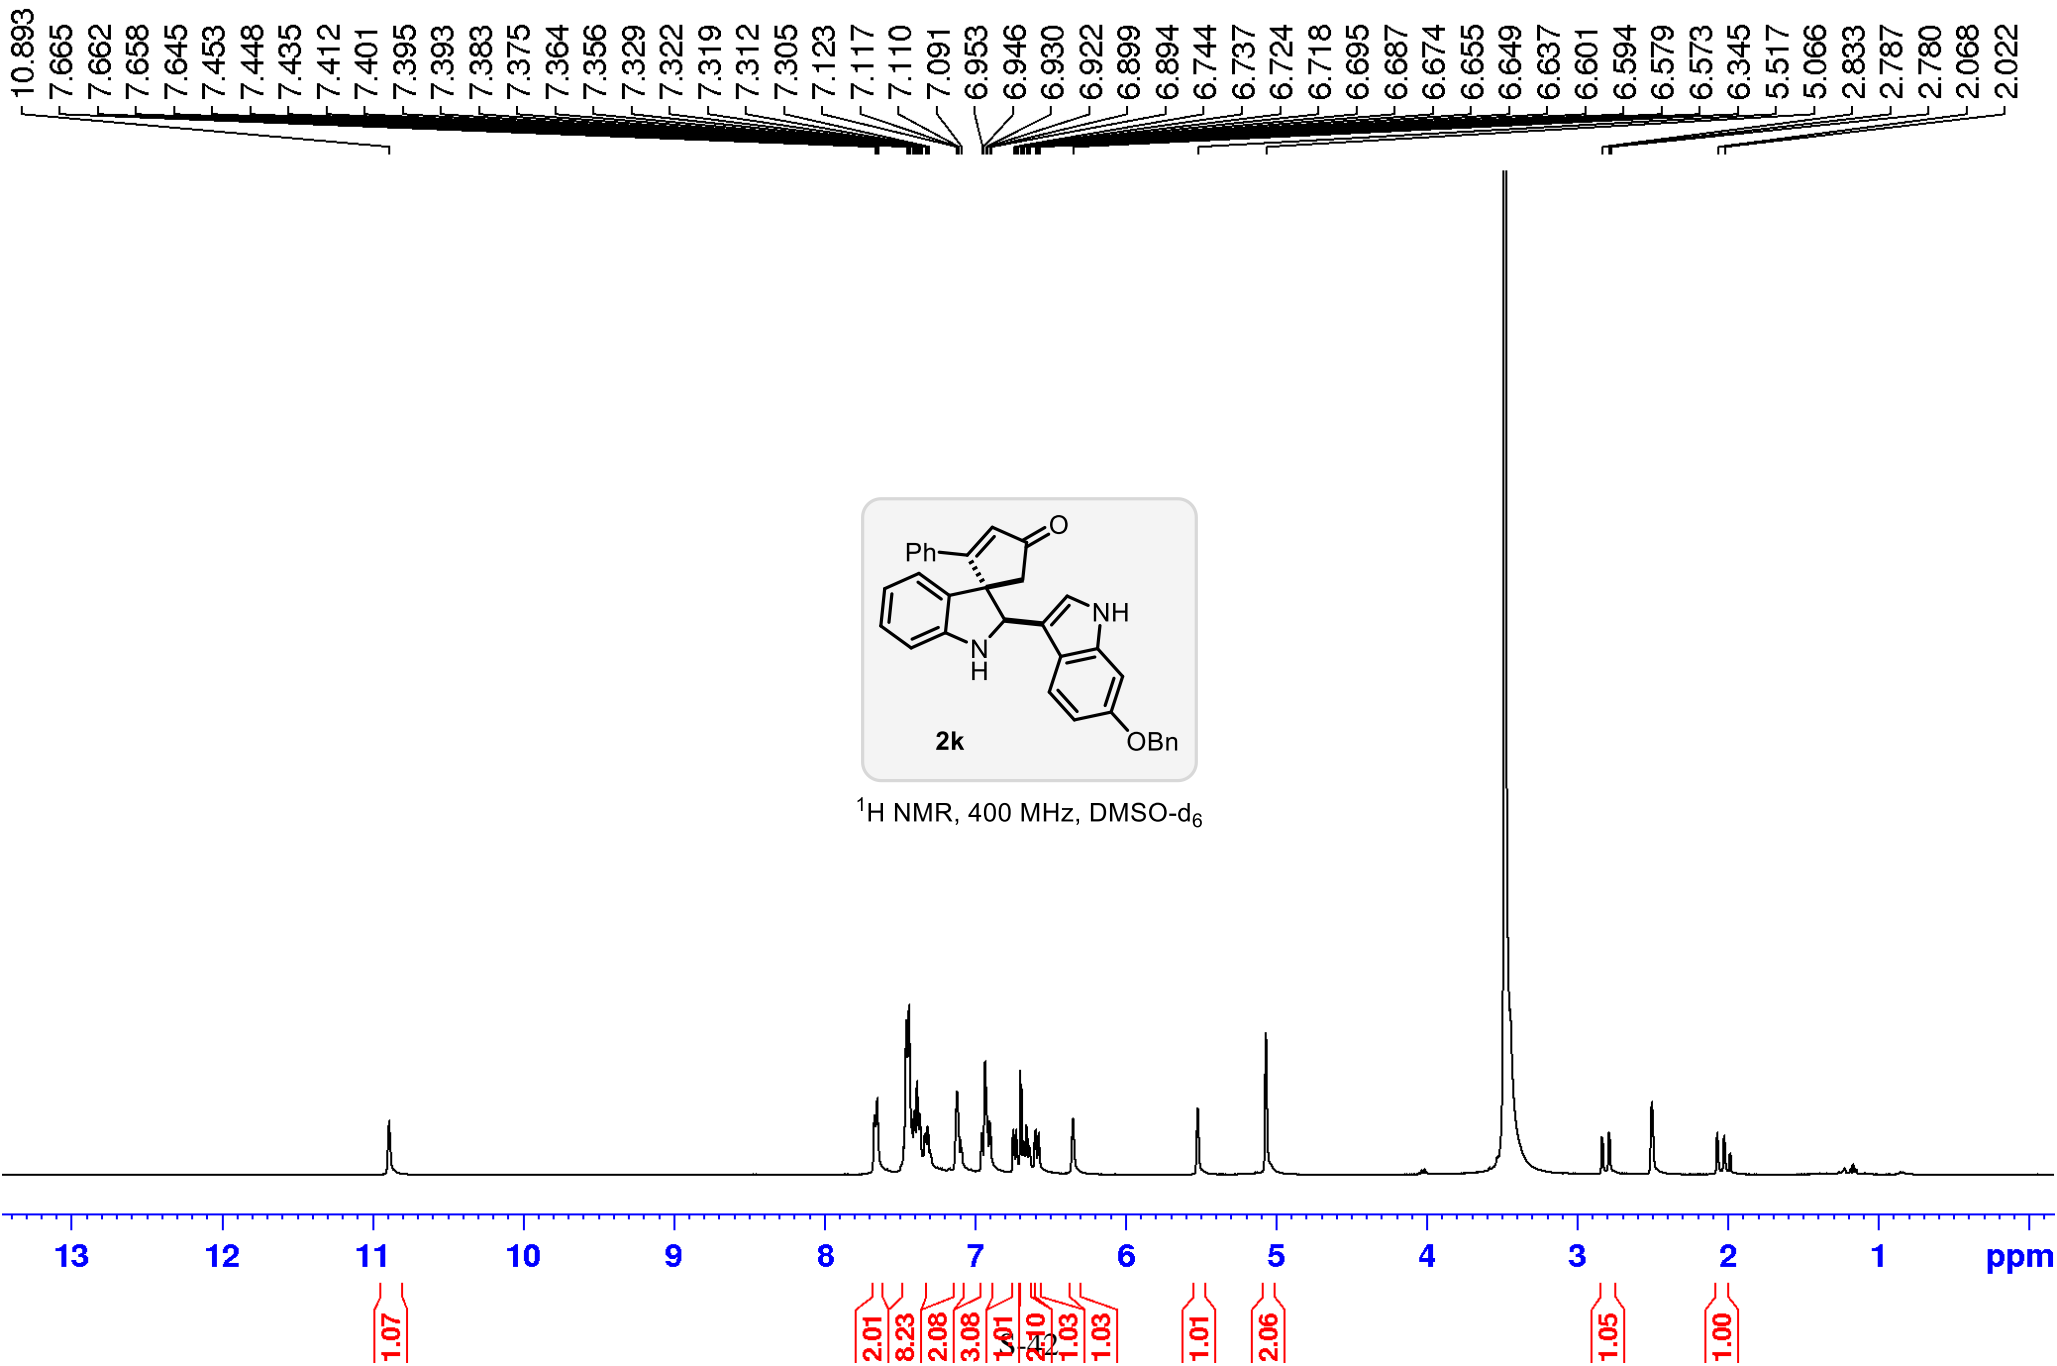

— 205.903

174.521  
154.617  
150.715  
137.617  
137.244  
133.734  
133.521  
130.619  
130.554  
129.209  
128.912  
128.527  
127.809  
127.678  
123.104  
122.751  
120.962  
119.776  
118.352  
112.719  
109.527  
109.206  
96.111

— 69.563

— 63.703

— 60.316

— 48.774

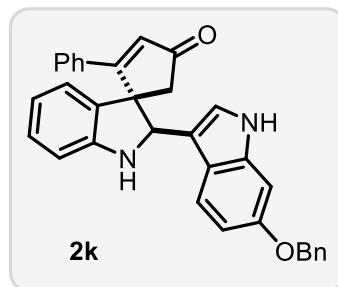

$^{13}\text{C}\{^1\text{H}\}$  NMR, 100 MHz, DMSO- $d_6$

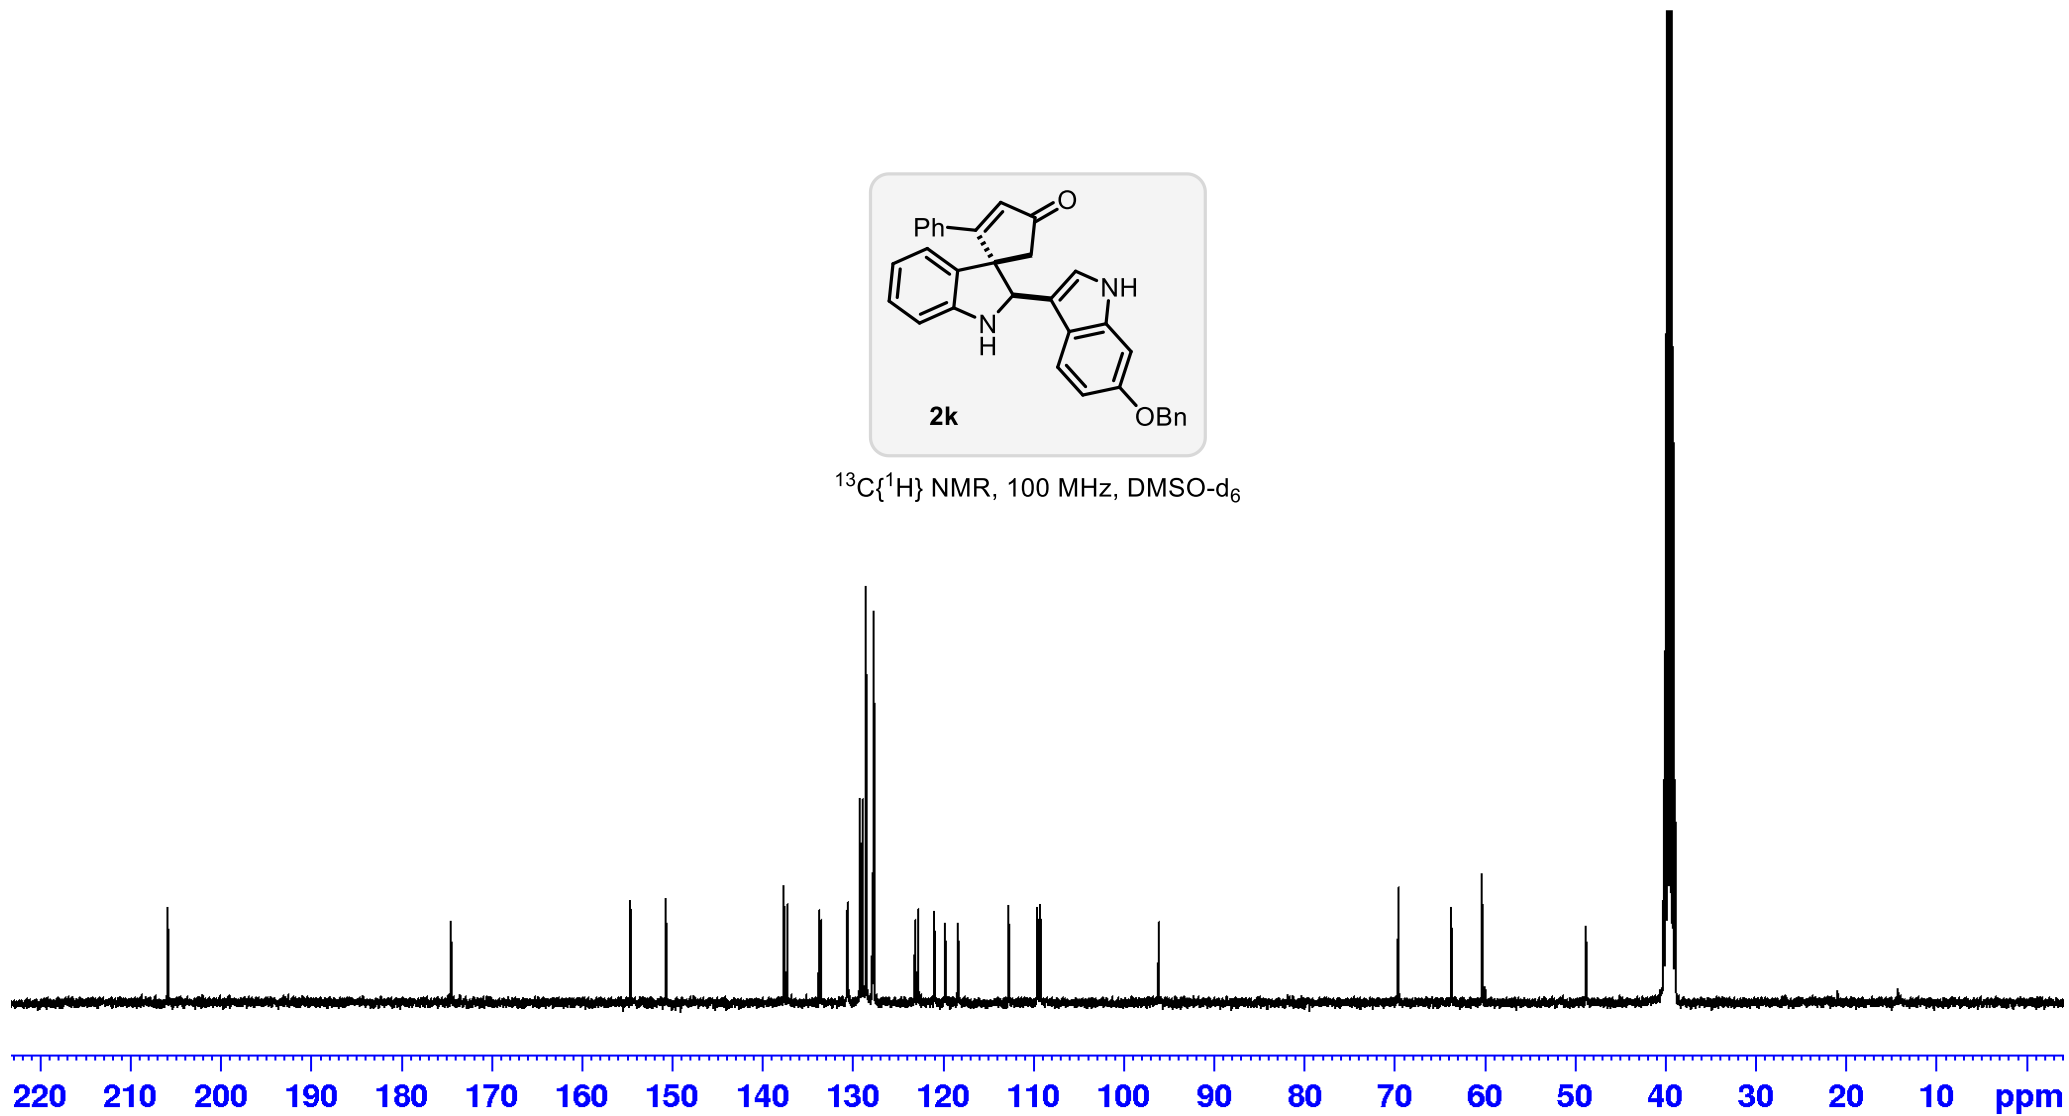

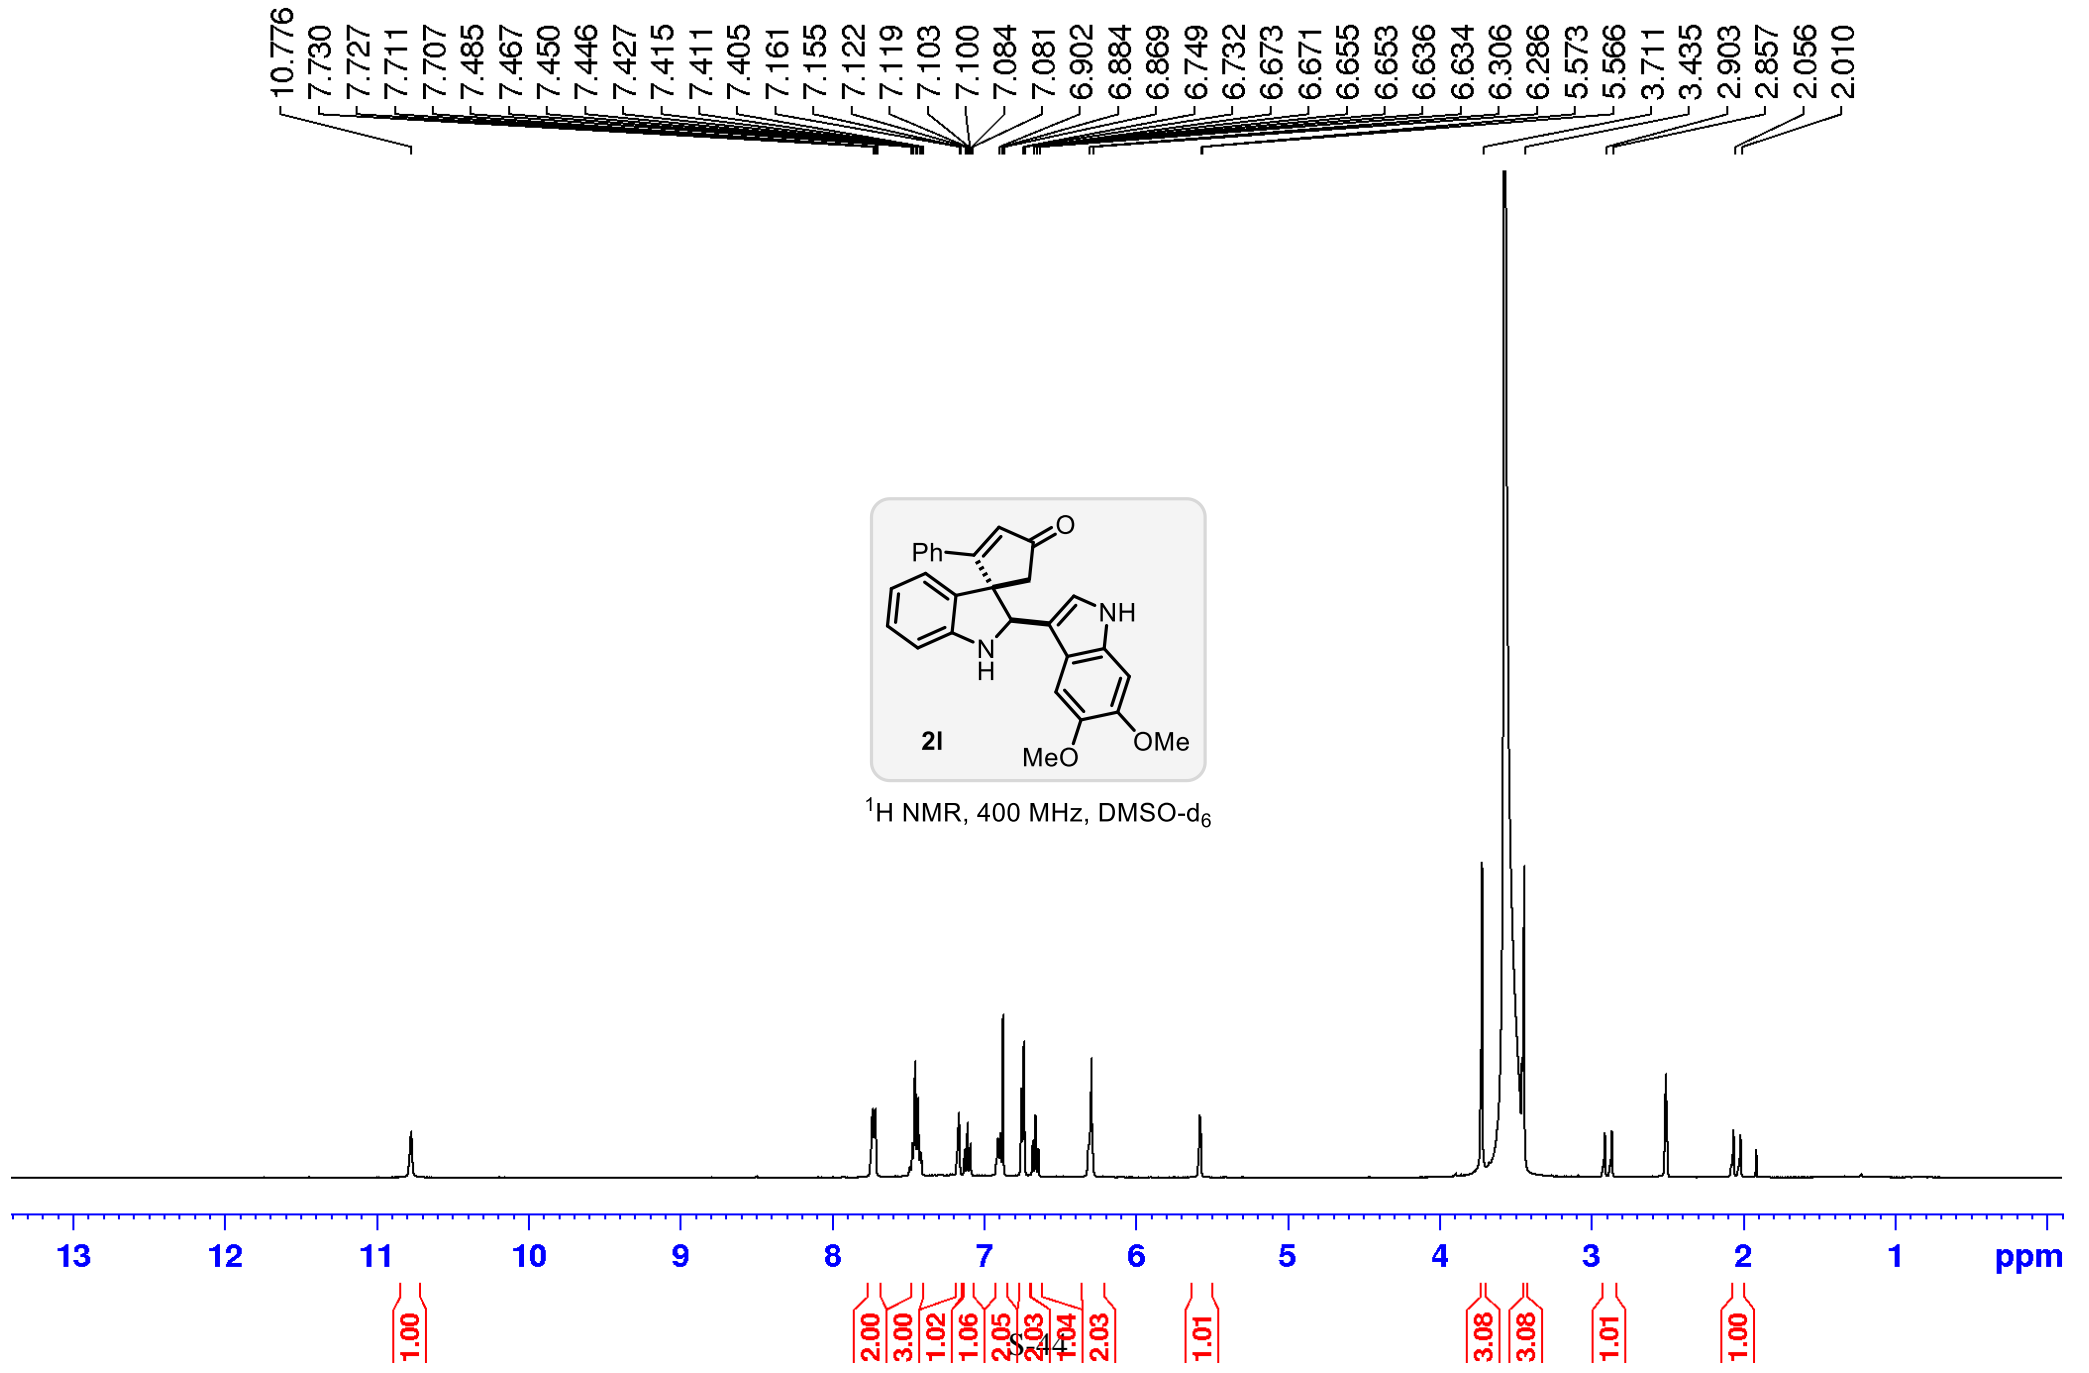

— 205.825

— 174.113

150.657  
146.343  
144.045  
134.018  
133.306  
130.758  
130.578  
129.254  
128.816  
128.414  
122.557  
119.012  
118.359  
112.580  
109.207  
100.997  
95.245

63.620  
59.955  
55.588  
55.554  
48.523

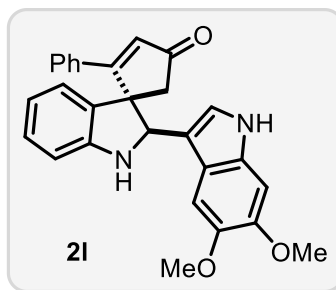

$^{13}\text{C}\{^1\text{H}\}$  NMR, 100 MHz, DMSO- $d_6$

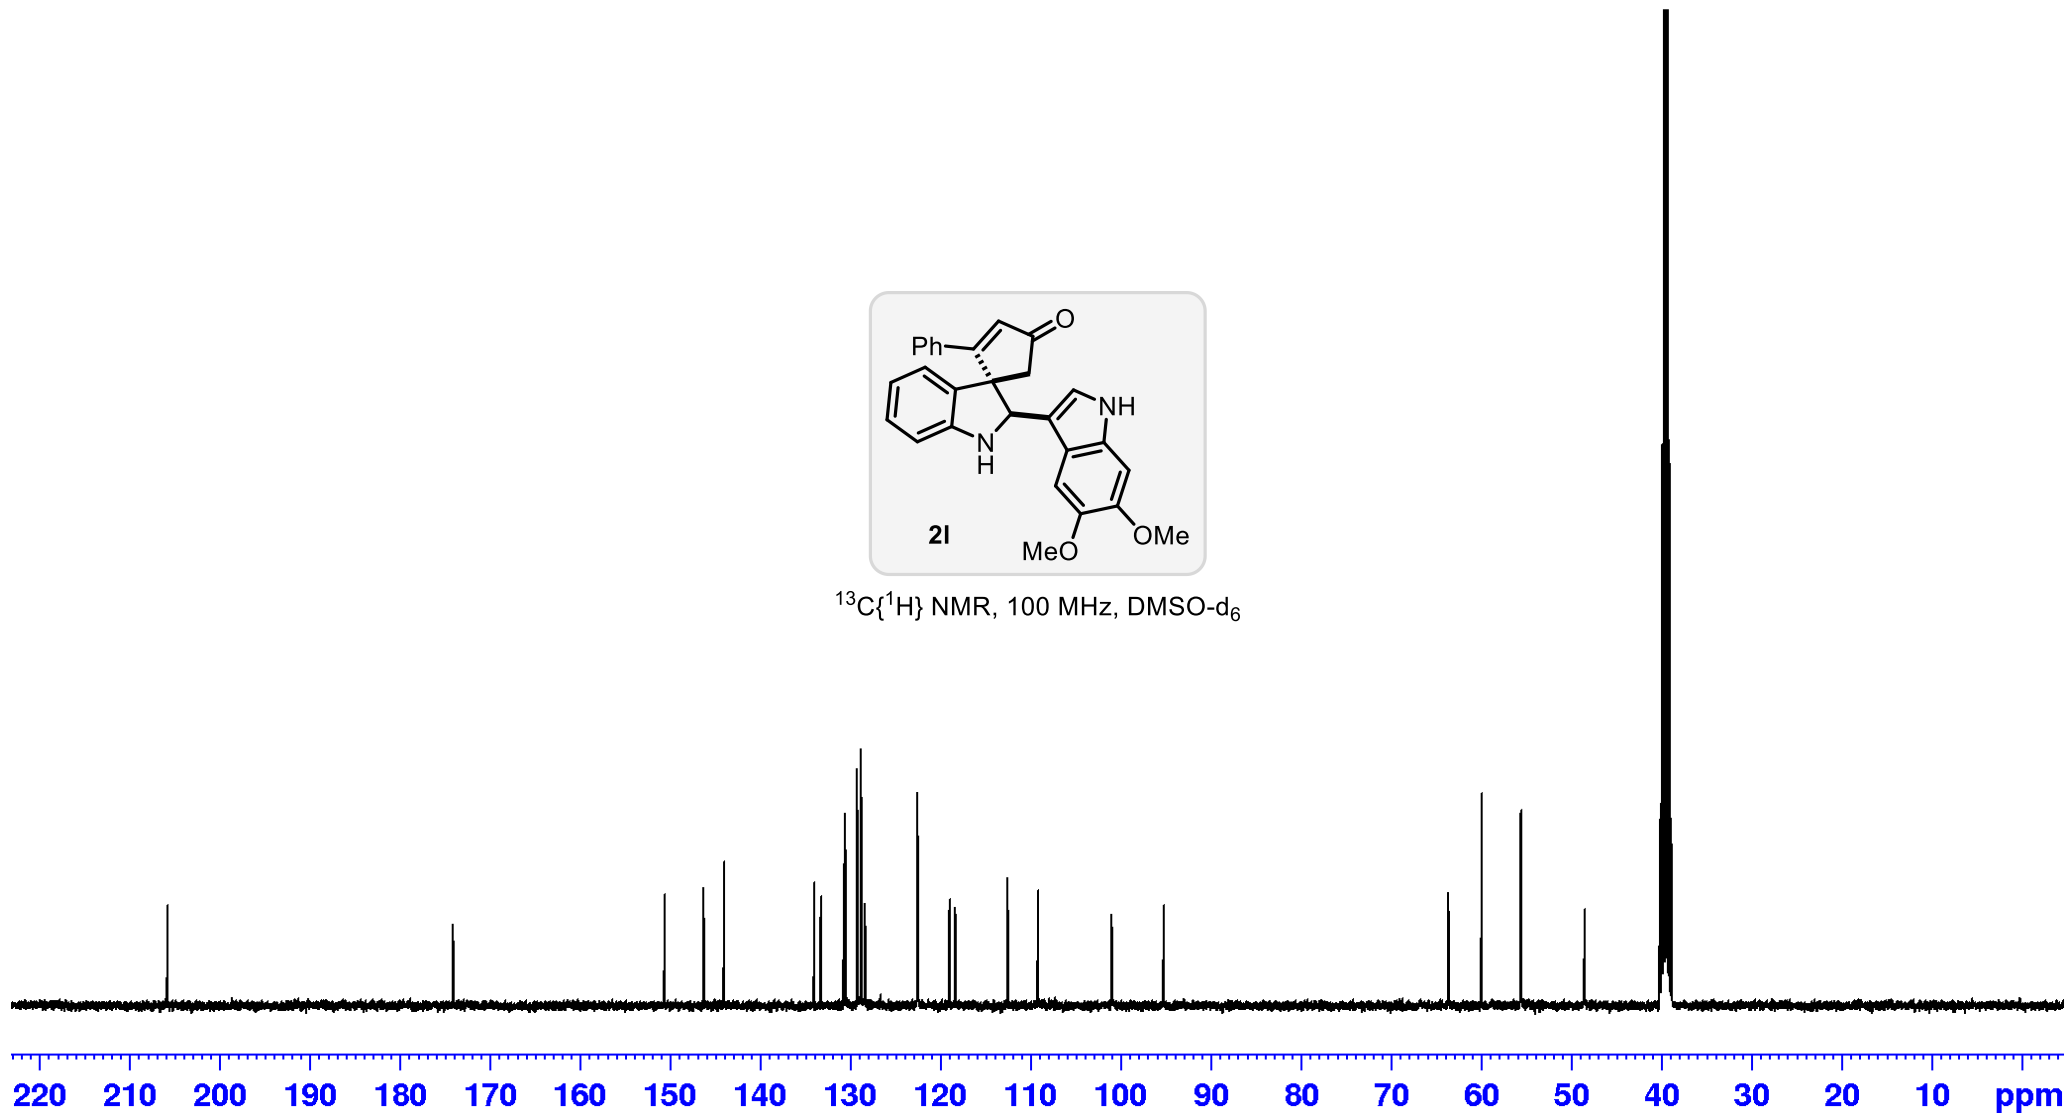

11.079  
7.676  
7.673  
7.657  
7.652  
7.475  
7.459  
7.449  
7.440  
7.425  
7.418  
7.269  
7.264  
7.131  
7.128  
7.112  
7.109  
7.093  
7.090  
6.914  
6.896  
6.851  
6.832  
6.818  
6.745  
6.742  
6.724  
6.704  
6.687  
6.674  
6.672  
6.653  
6.637  
6.635  
6.358  
6.351  
5.582  
5.576  
2.844  
2.797  
2.419  
2.071  
2.025

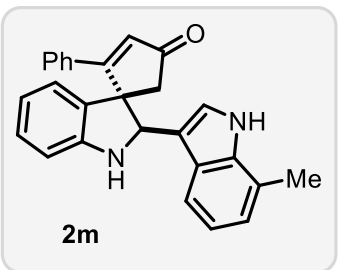

<sup>1</sup>H NMR, 400 MHz, DMSO-d<sub>6</sub>

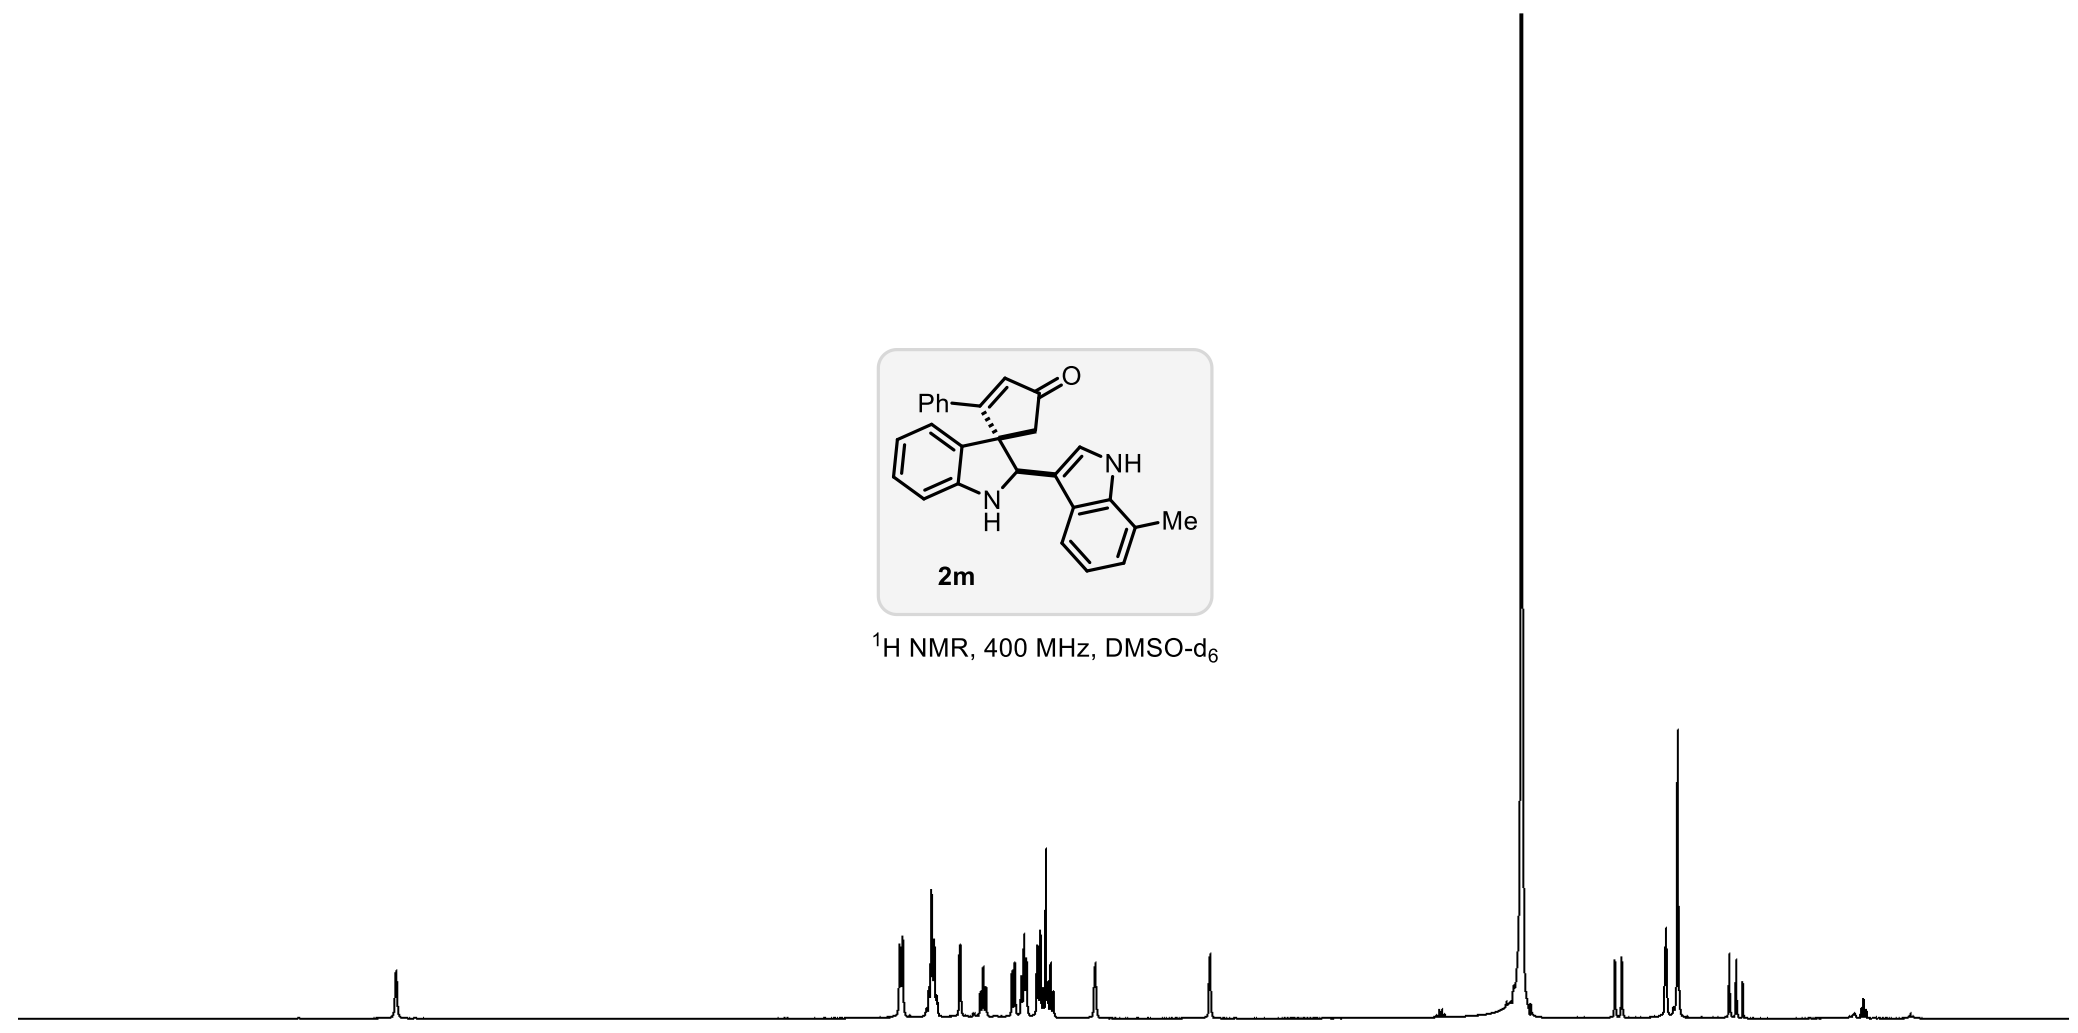

13 12 11 10 9 8 7 6 5 4 3 2 1 ppm

1.02

2.01  
3.02  
1.09  
1.08  
1.03  
2.07  
2.02  
1.03  
1.07  
1.06  
1.04

1.06  
3.05  
1.00

— 206.285

— 174.967

151.037  
136.441  
134.178  
133.874  
130.988  
130.876  
129.589  
129.253  
128.903  
126.435  
124.428  
123.050  
122.193  
121.243  
119.259  
118.712  
117.055  
113.556  
109.551

— 63.993

— 60.594

— 49.139

— 17.205

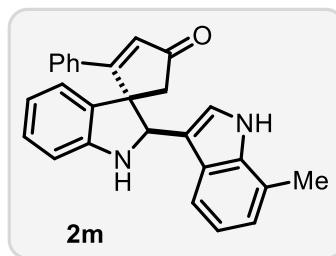

$^{13}\text{C}\{^1\text{H}\}$  NMR, 100 MHz, DMSO- $\text{d}_6$

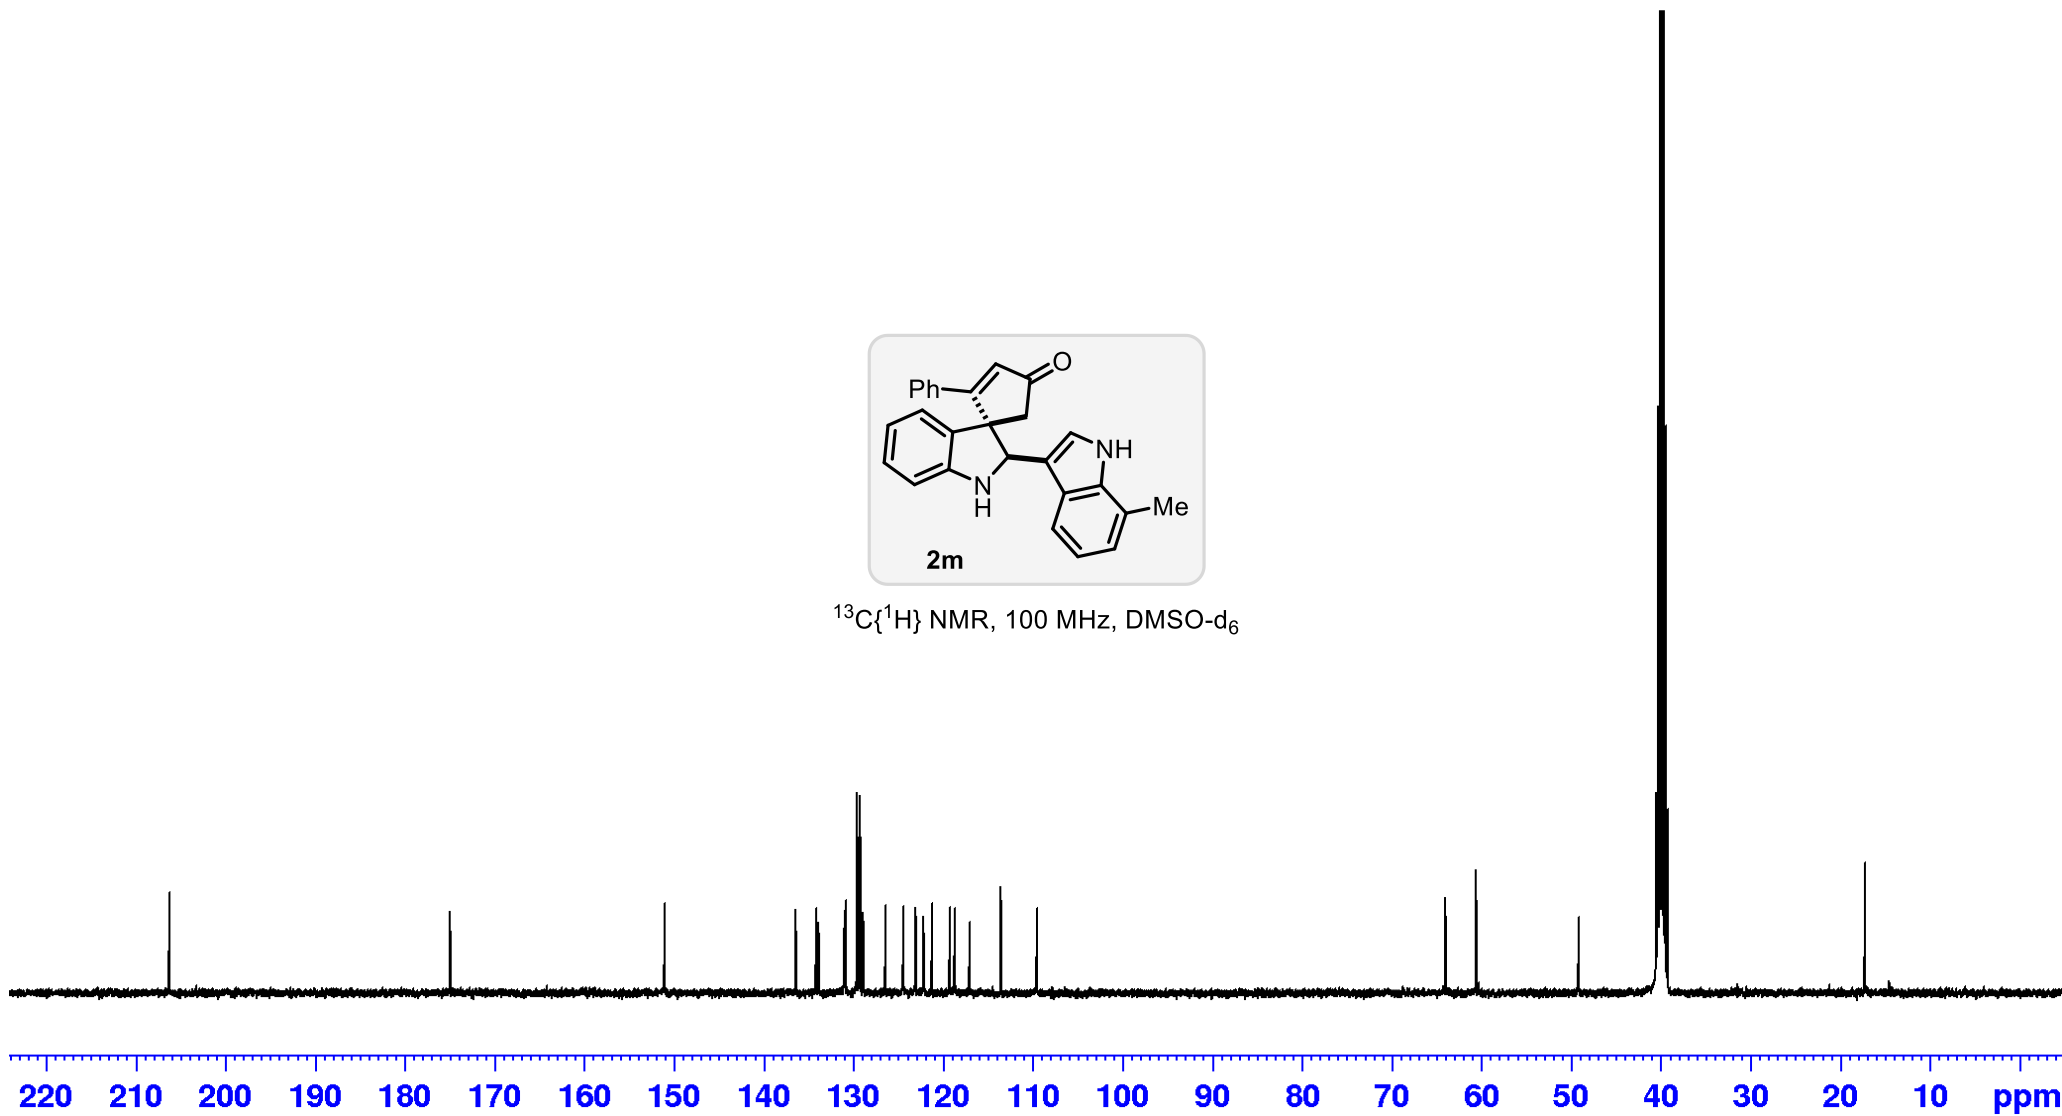

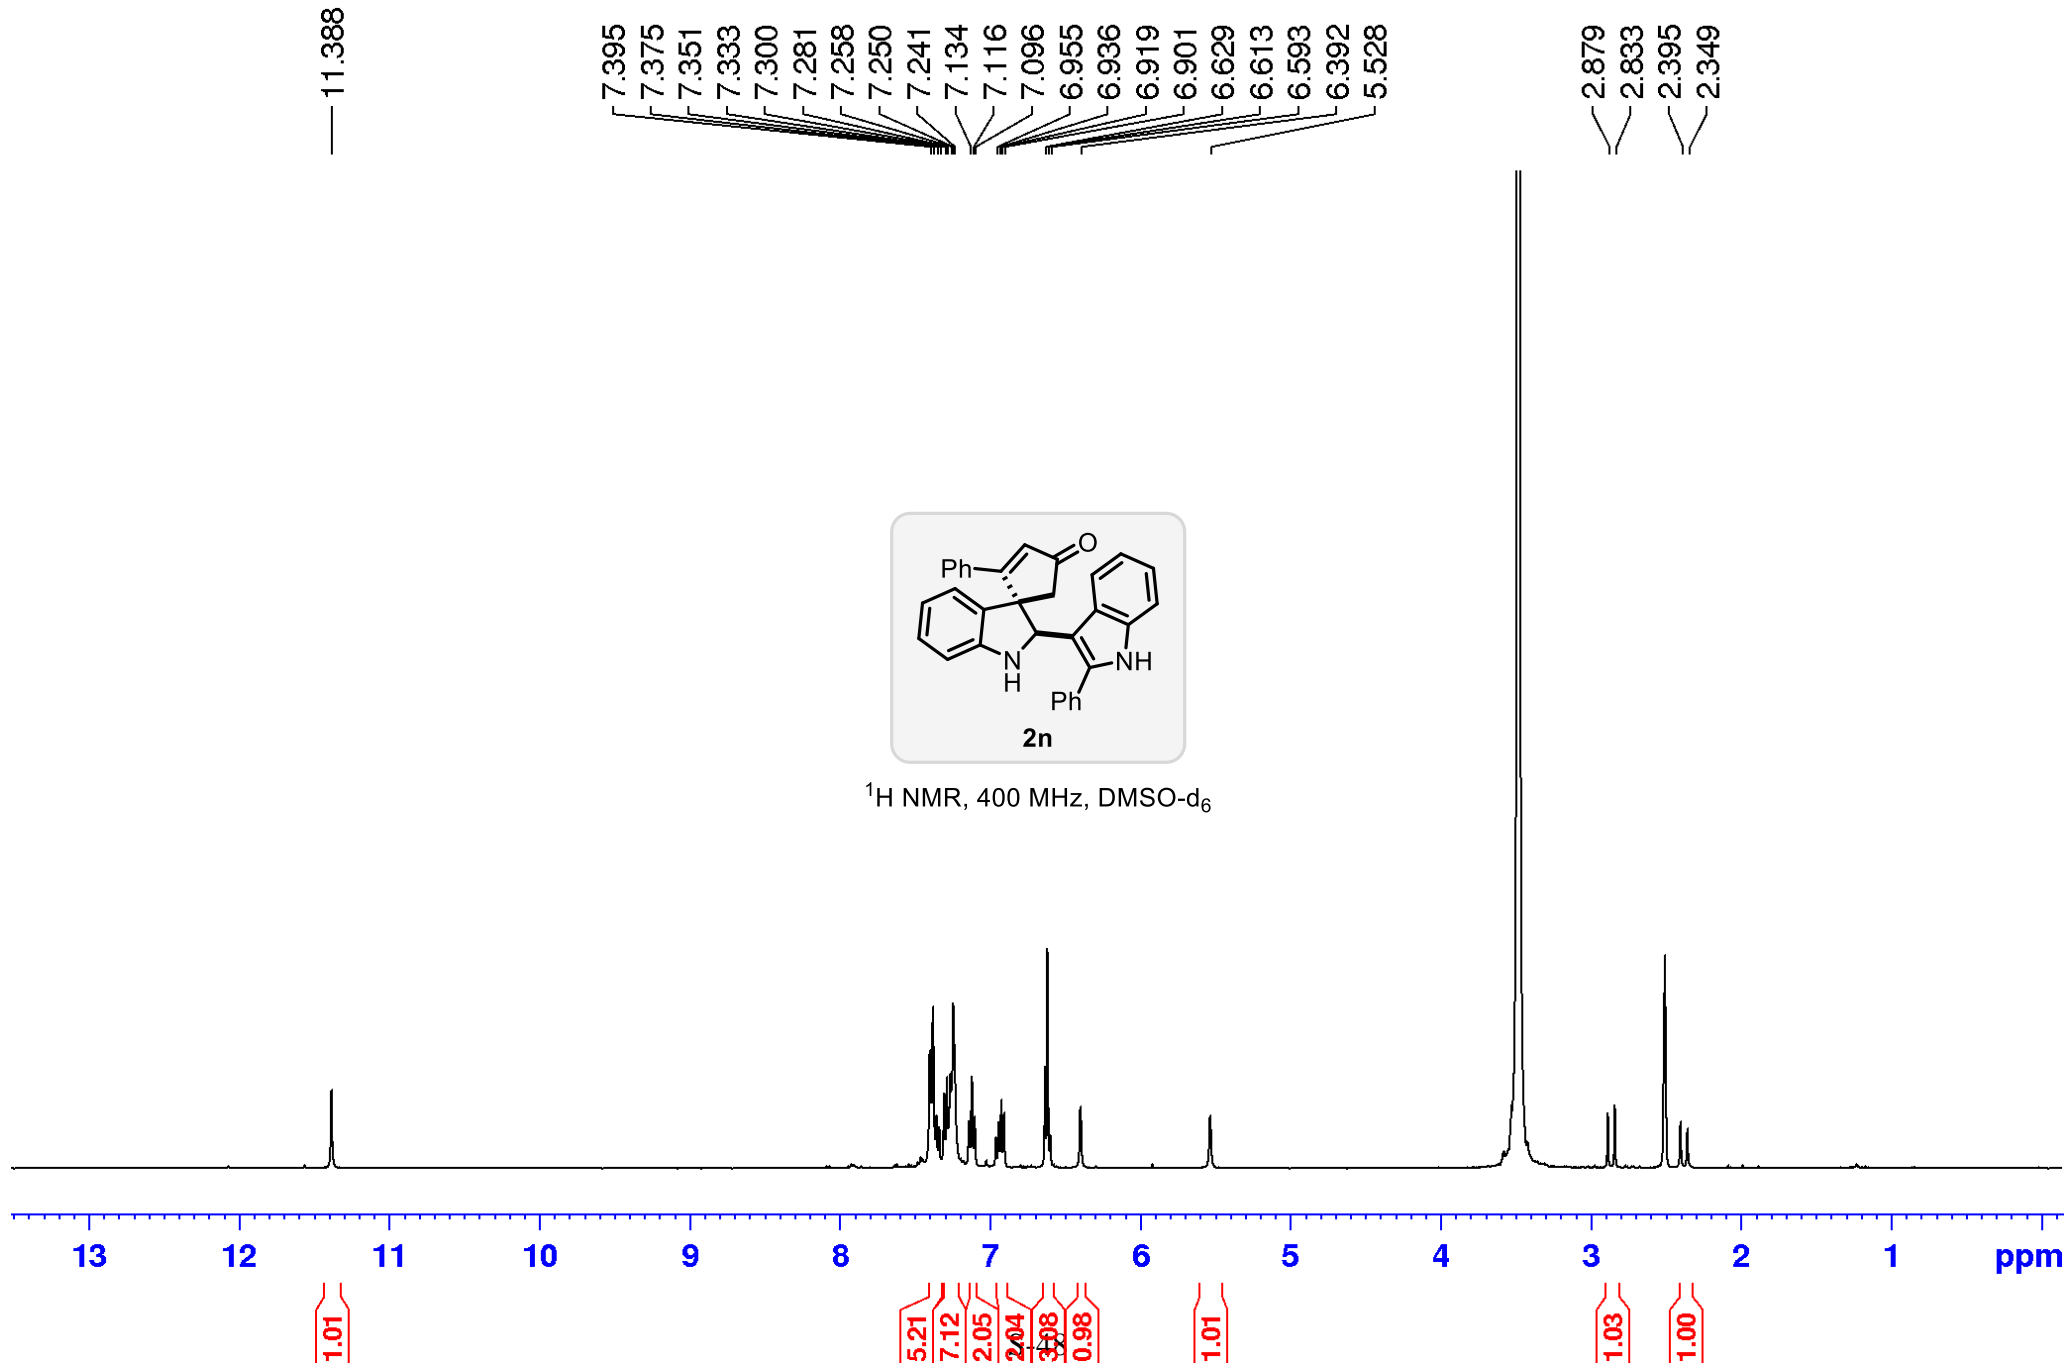



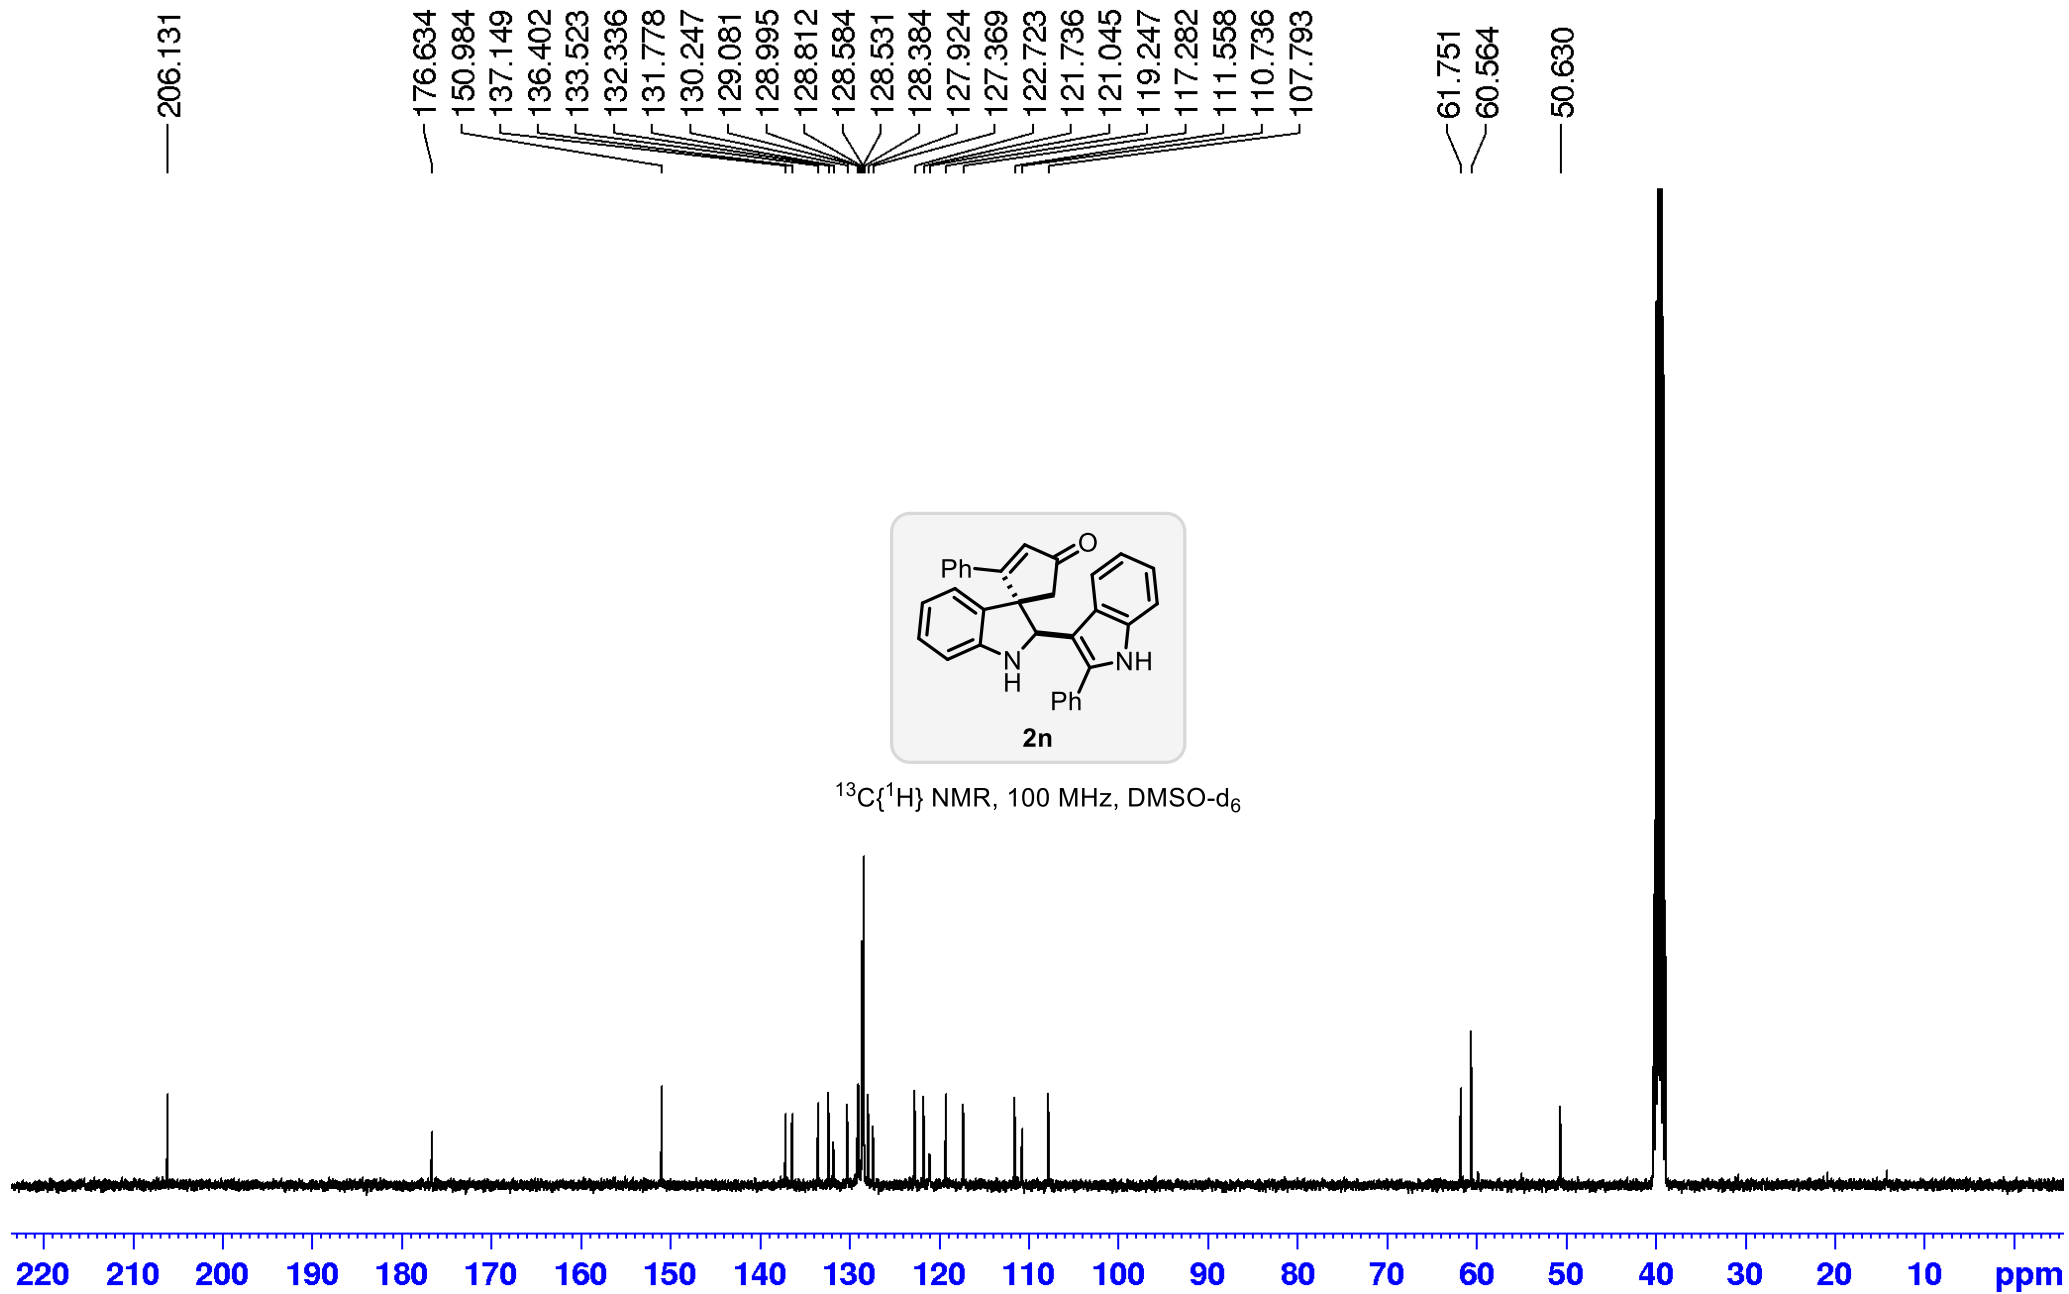

7.670  
7.651  
7.481  
7.463  
7.445  
7.386  
7.366  
7.306  
7.136  
7.116  
7.097  
7.076  
7.020  
7.000  
6.922  
6.903  
6.875  
6.856  
6.837  
6.751  
6.731  
6.696  
6.684  
6.665  
6.646  
6.362  
6.356  
5.578  
5.572  
3.745  
2.853  
2.807  
2.081  
2.035

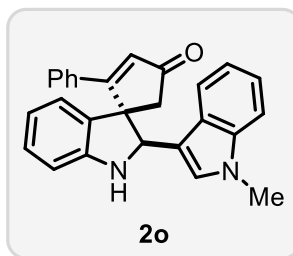

<sup>1</sup>H NMR, 400 MHz, DMSO-d<sub>6</sub>

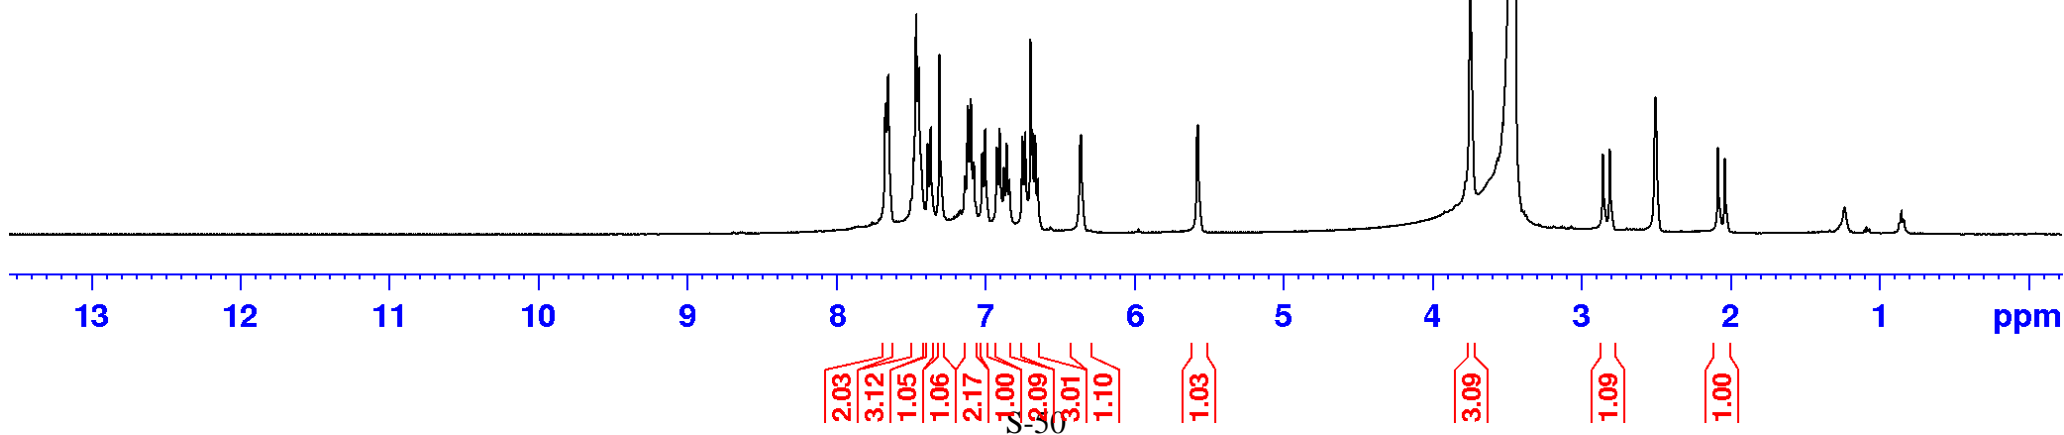

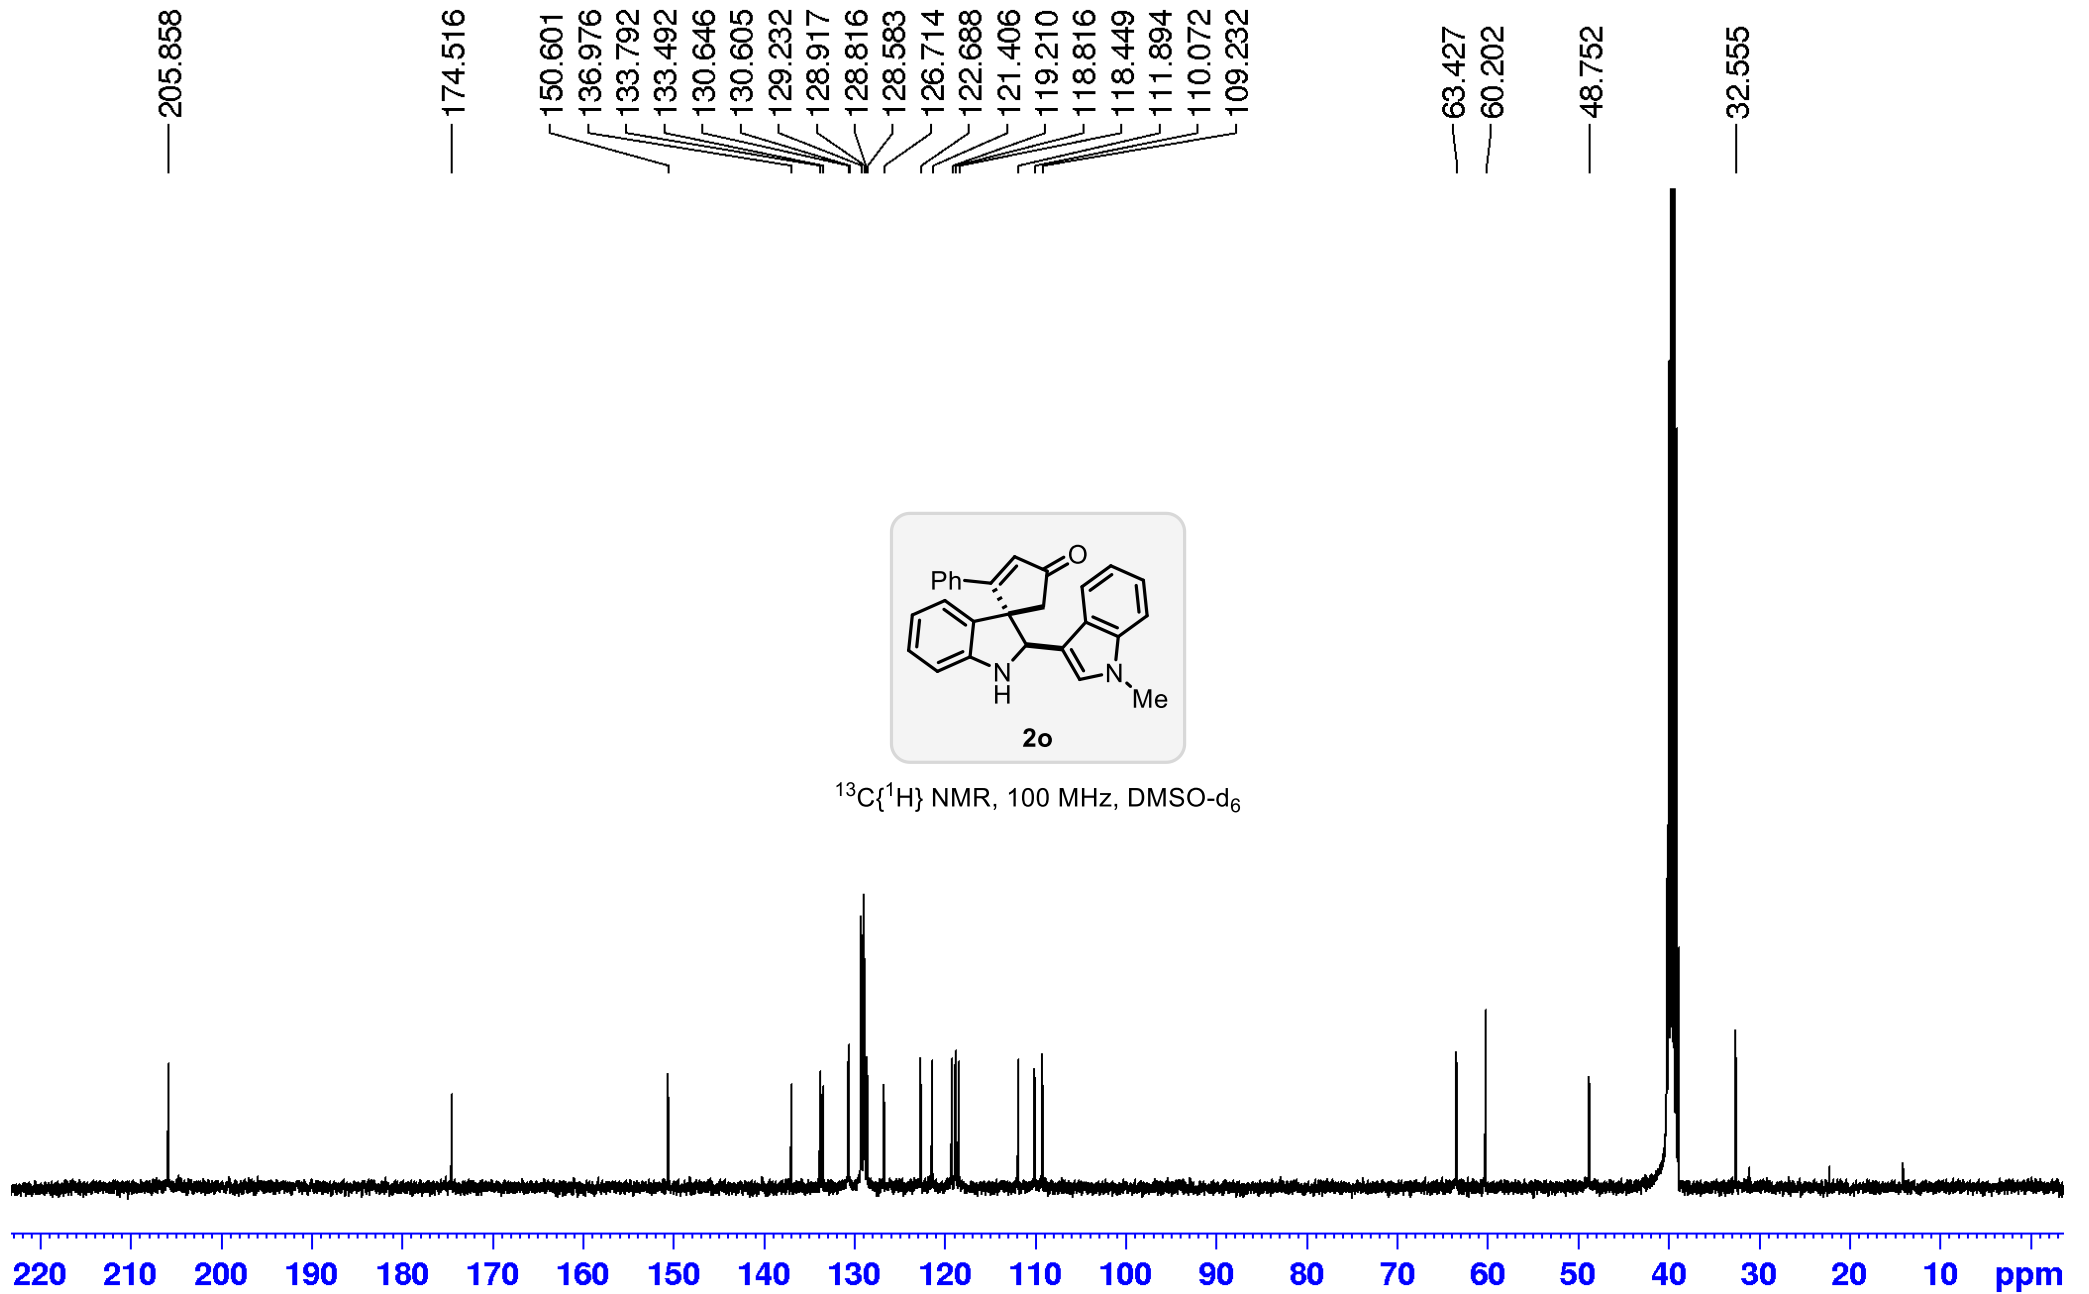

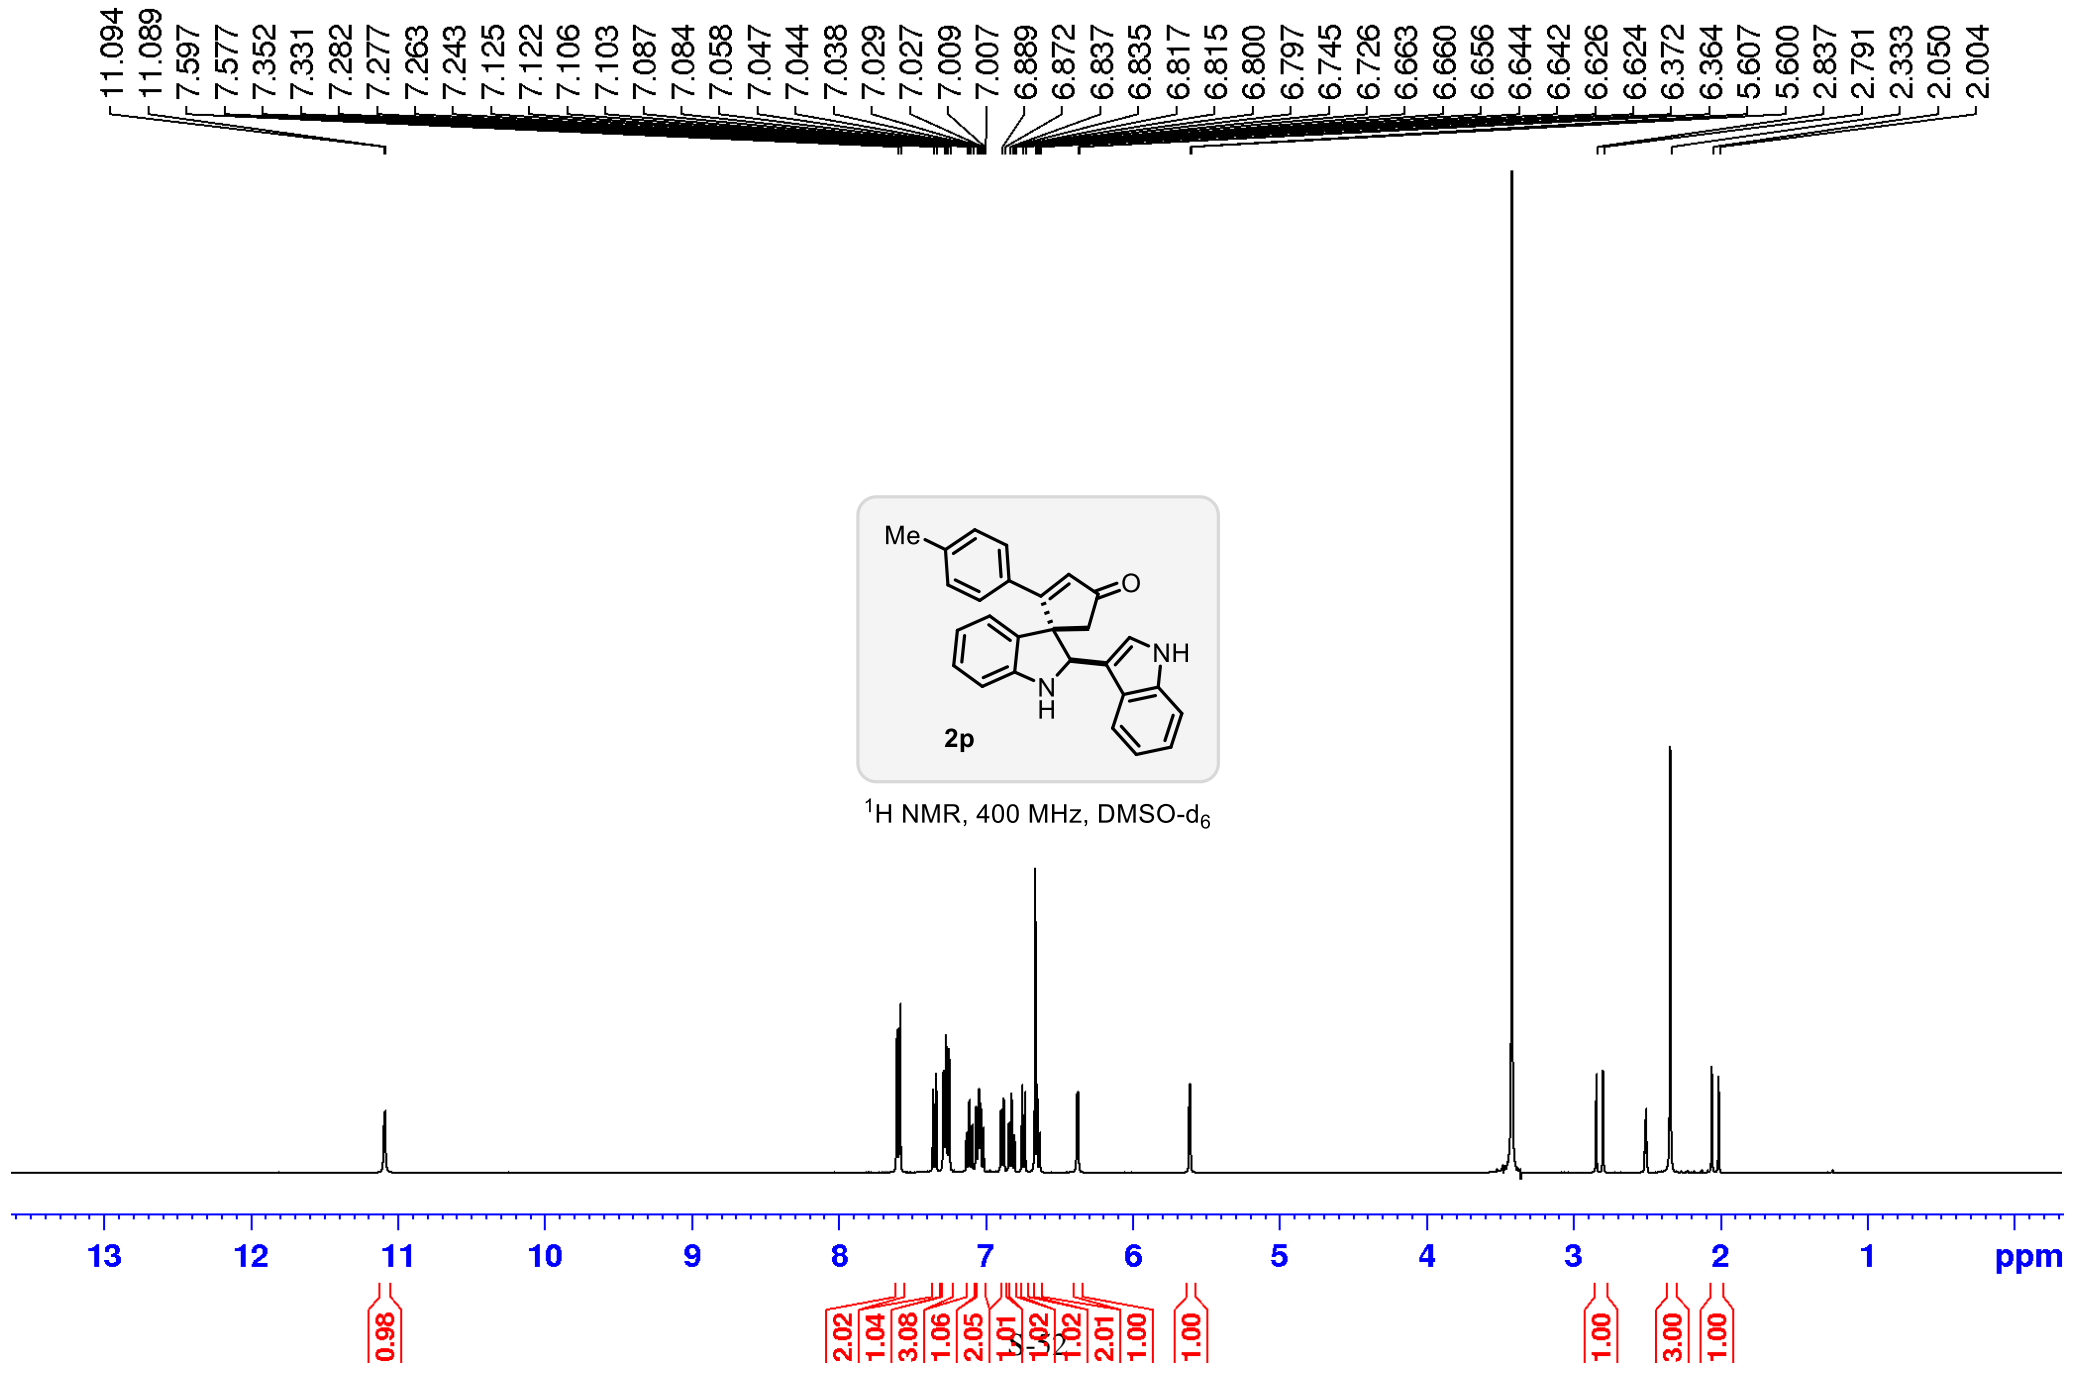

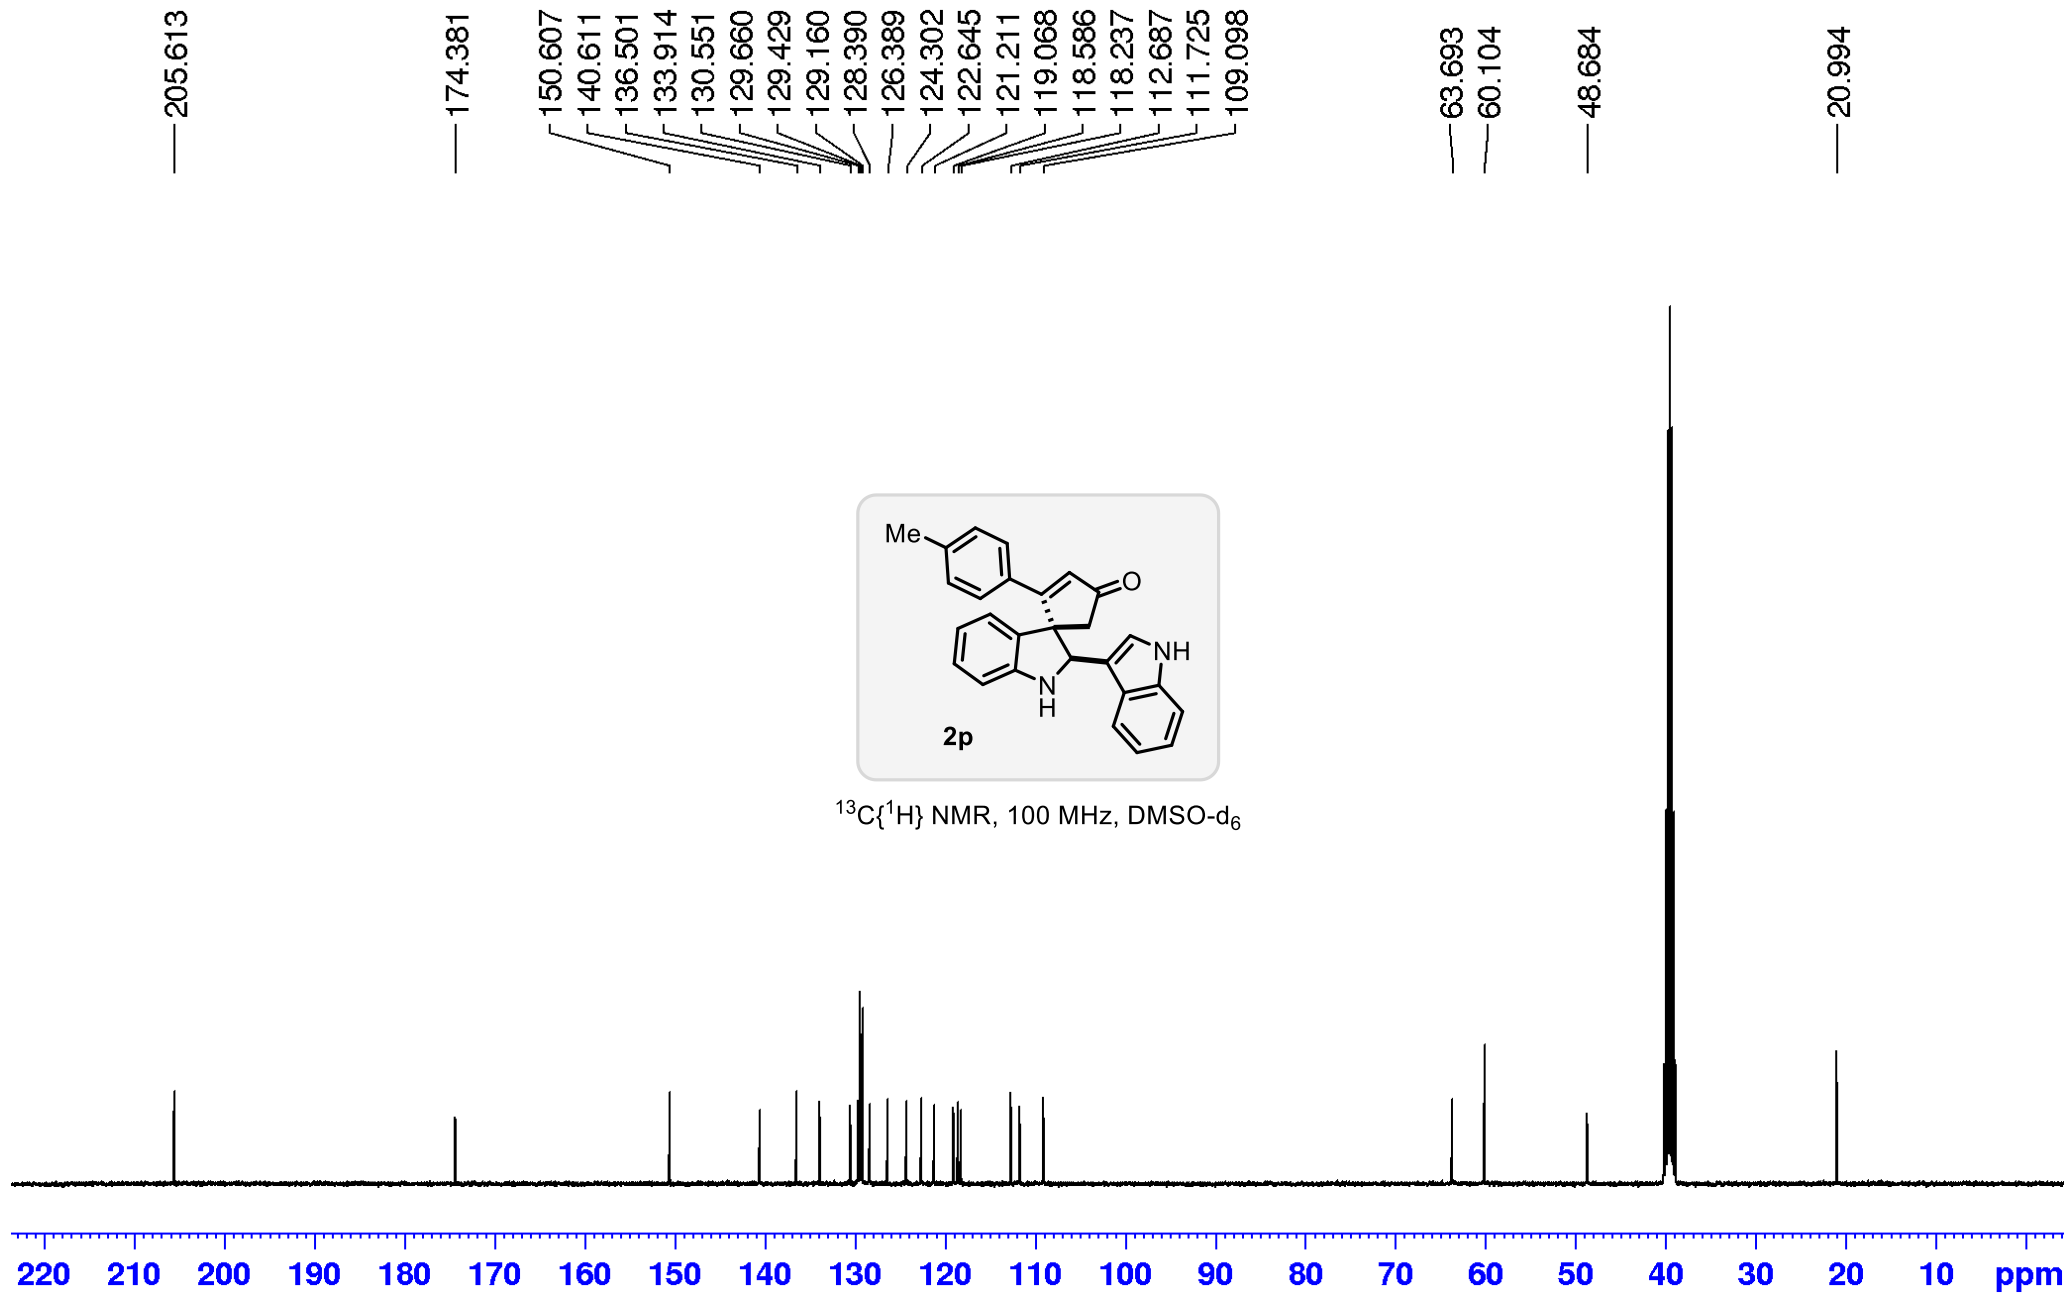

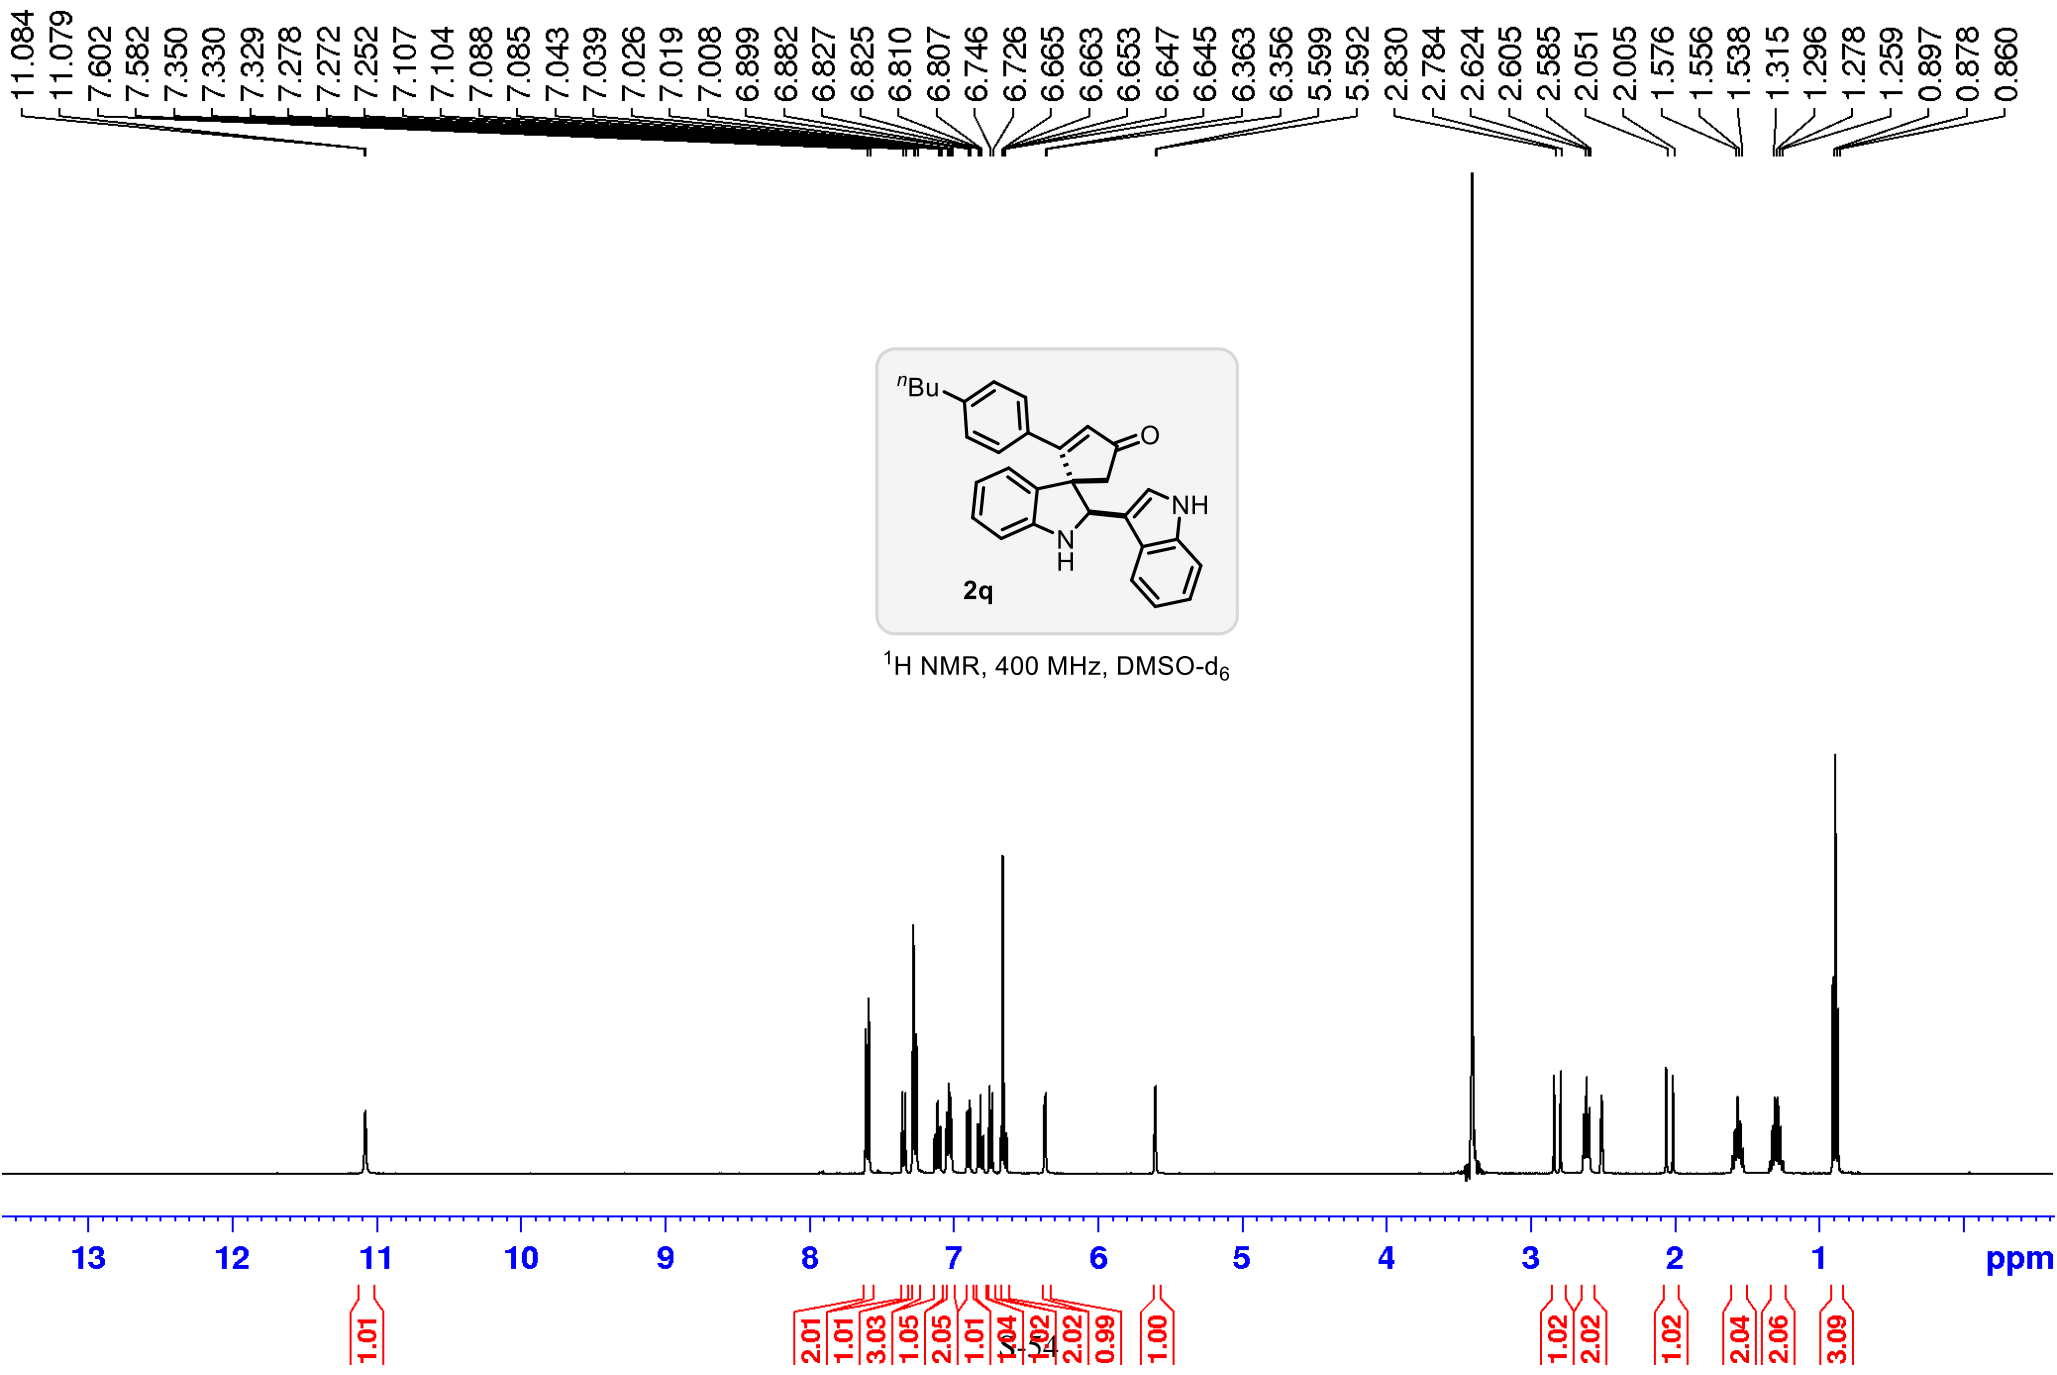

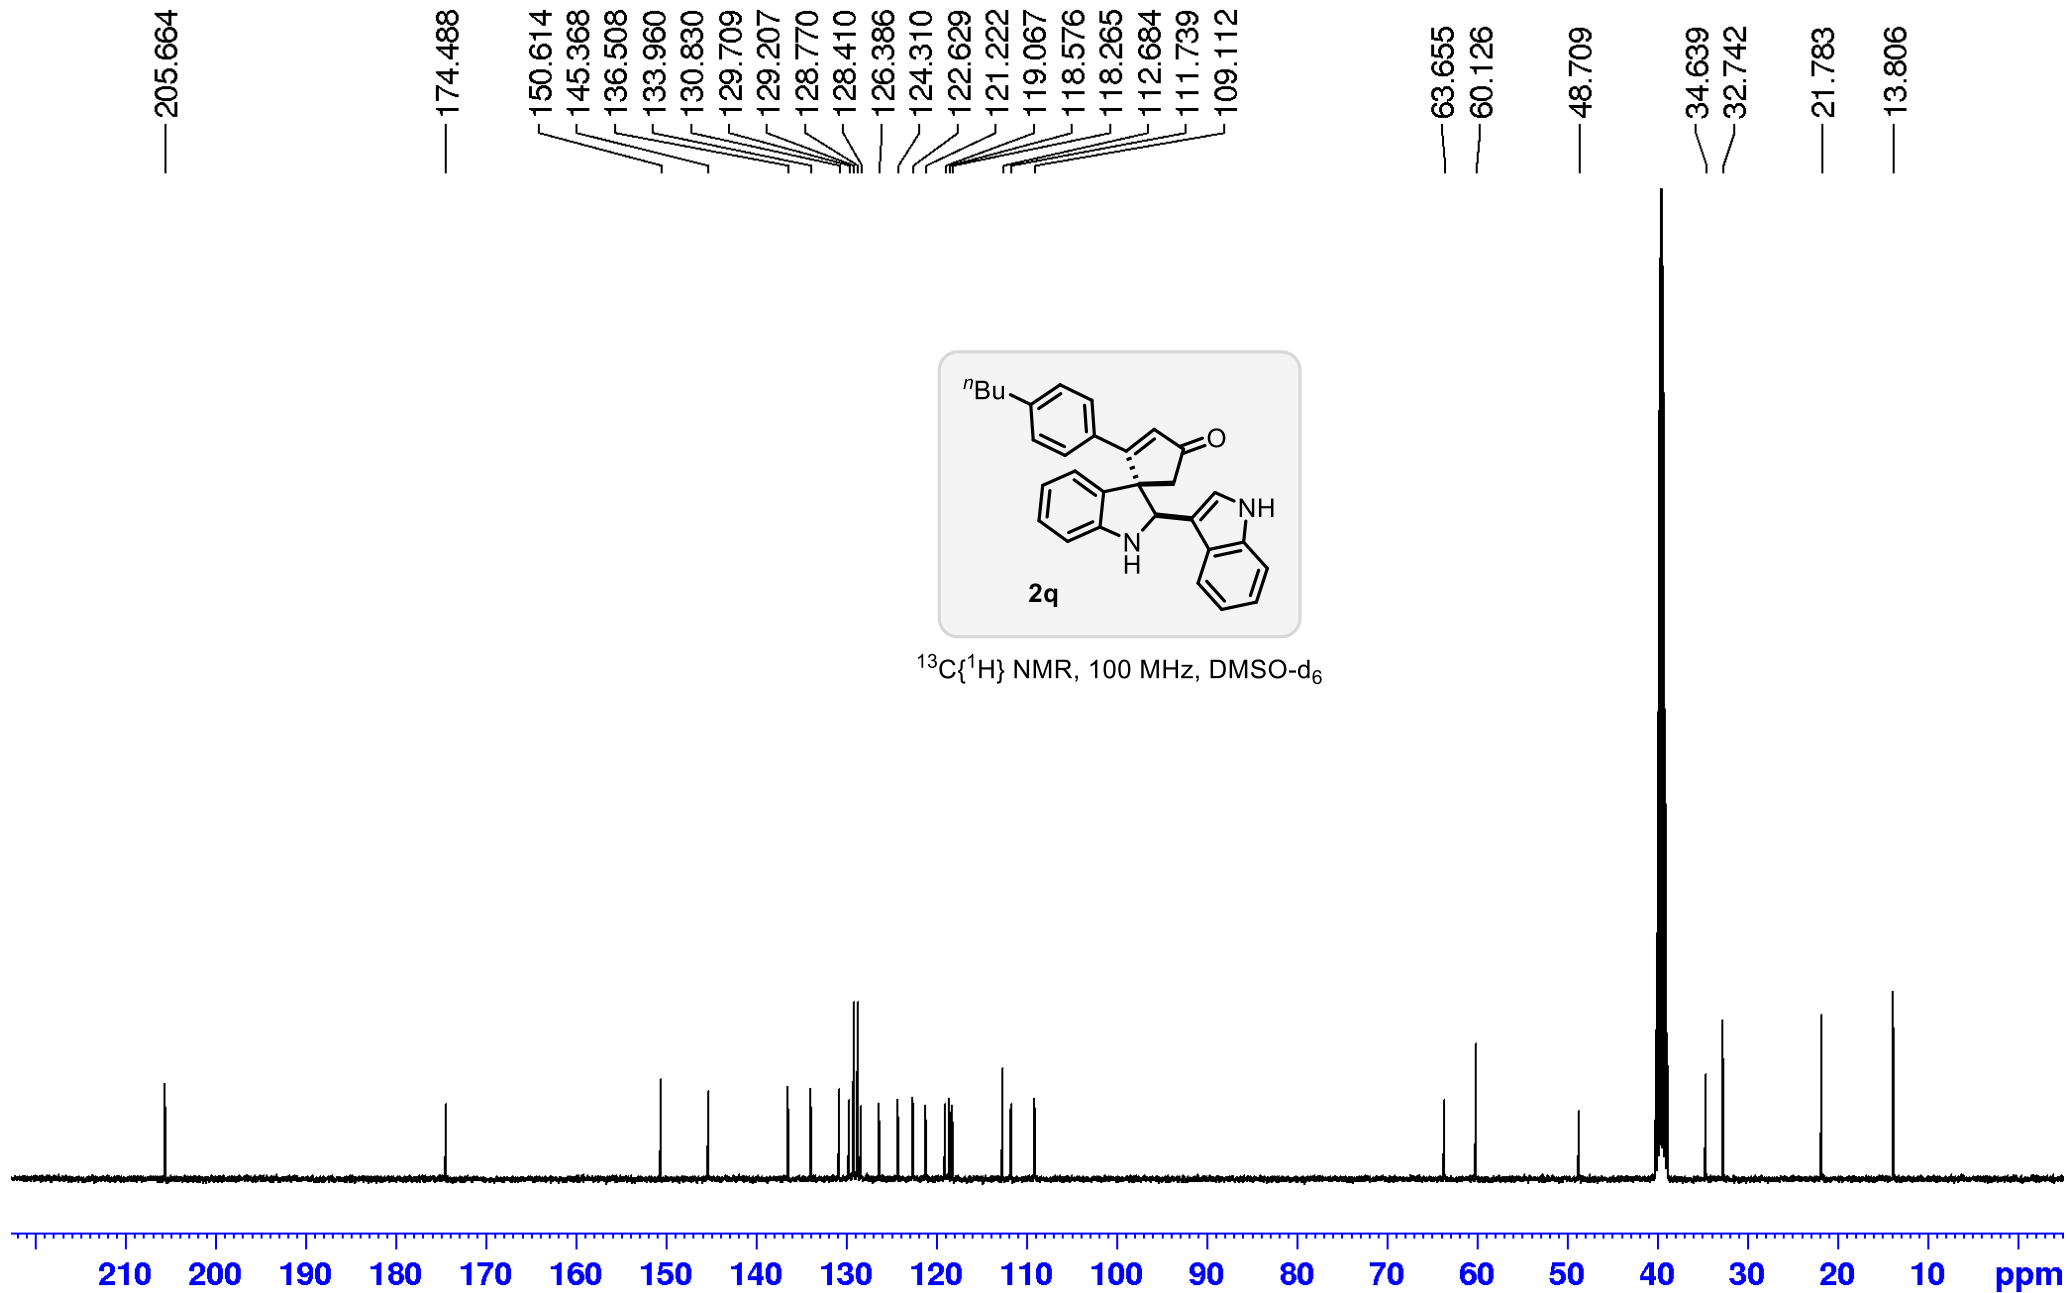

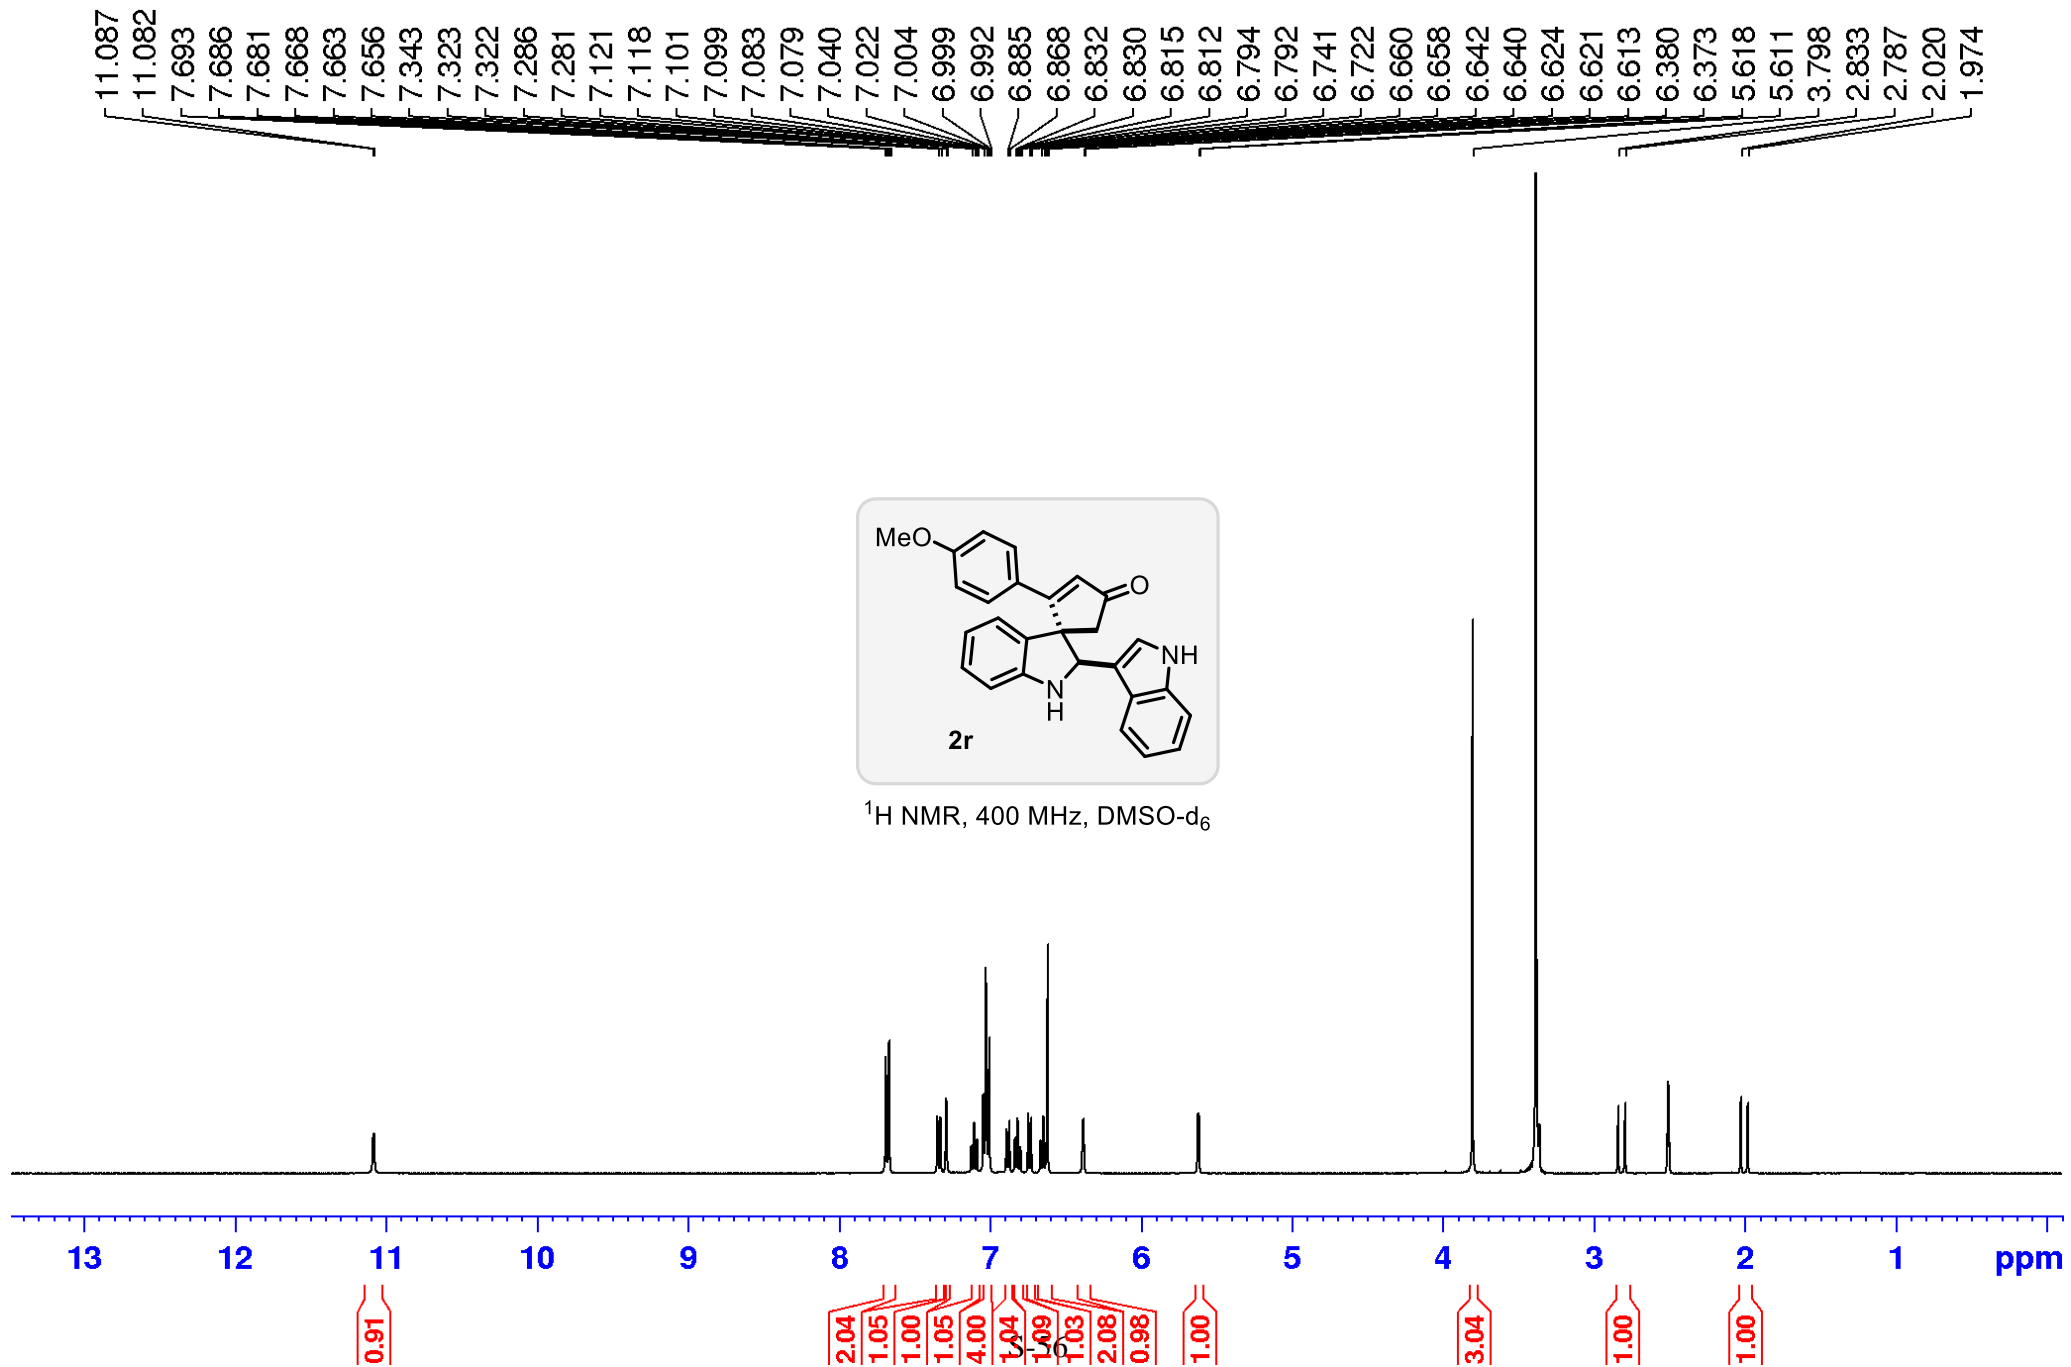



— 205.336

— 174.004

— 160.968

— 150.536

— 136.466

— 134.097

— 131.043

— 128.542

— 128.346

— 126.410

— 125.538

— 124.303

— 122.618

— 121.181

— 119.028

— 118.566

— 118.250

— 114.276

— 112.675

— 111.699

— 109.075

— 63.807

— 59.964

— 55.409

— 48.649

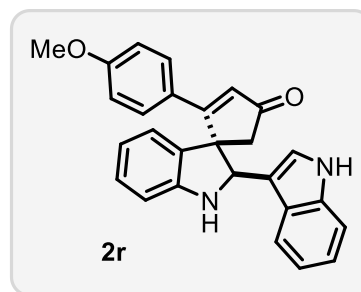

$^{13}\text{C}\{^1\text{H}\}$  NMR, 100 MHz, DMSO- $\text{d}_6$

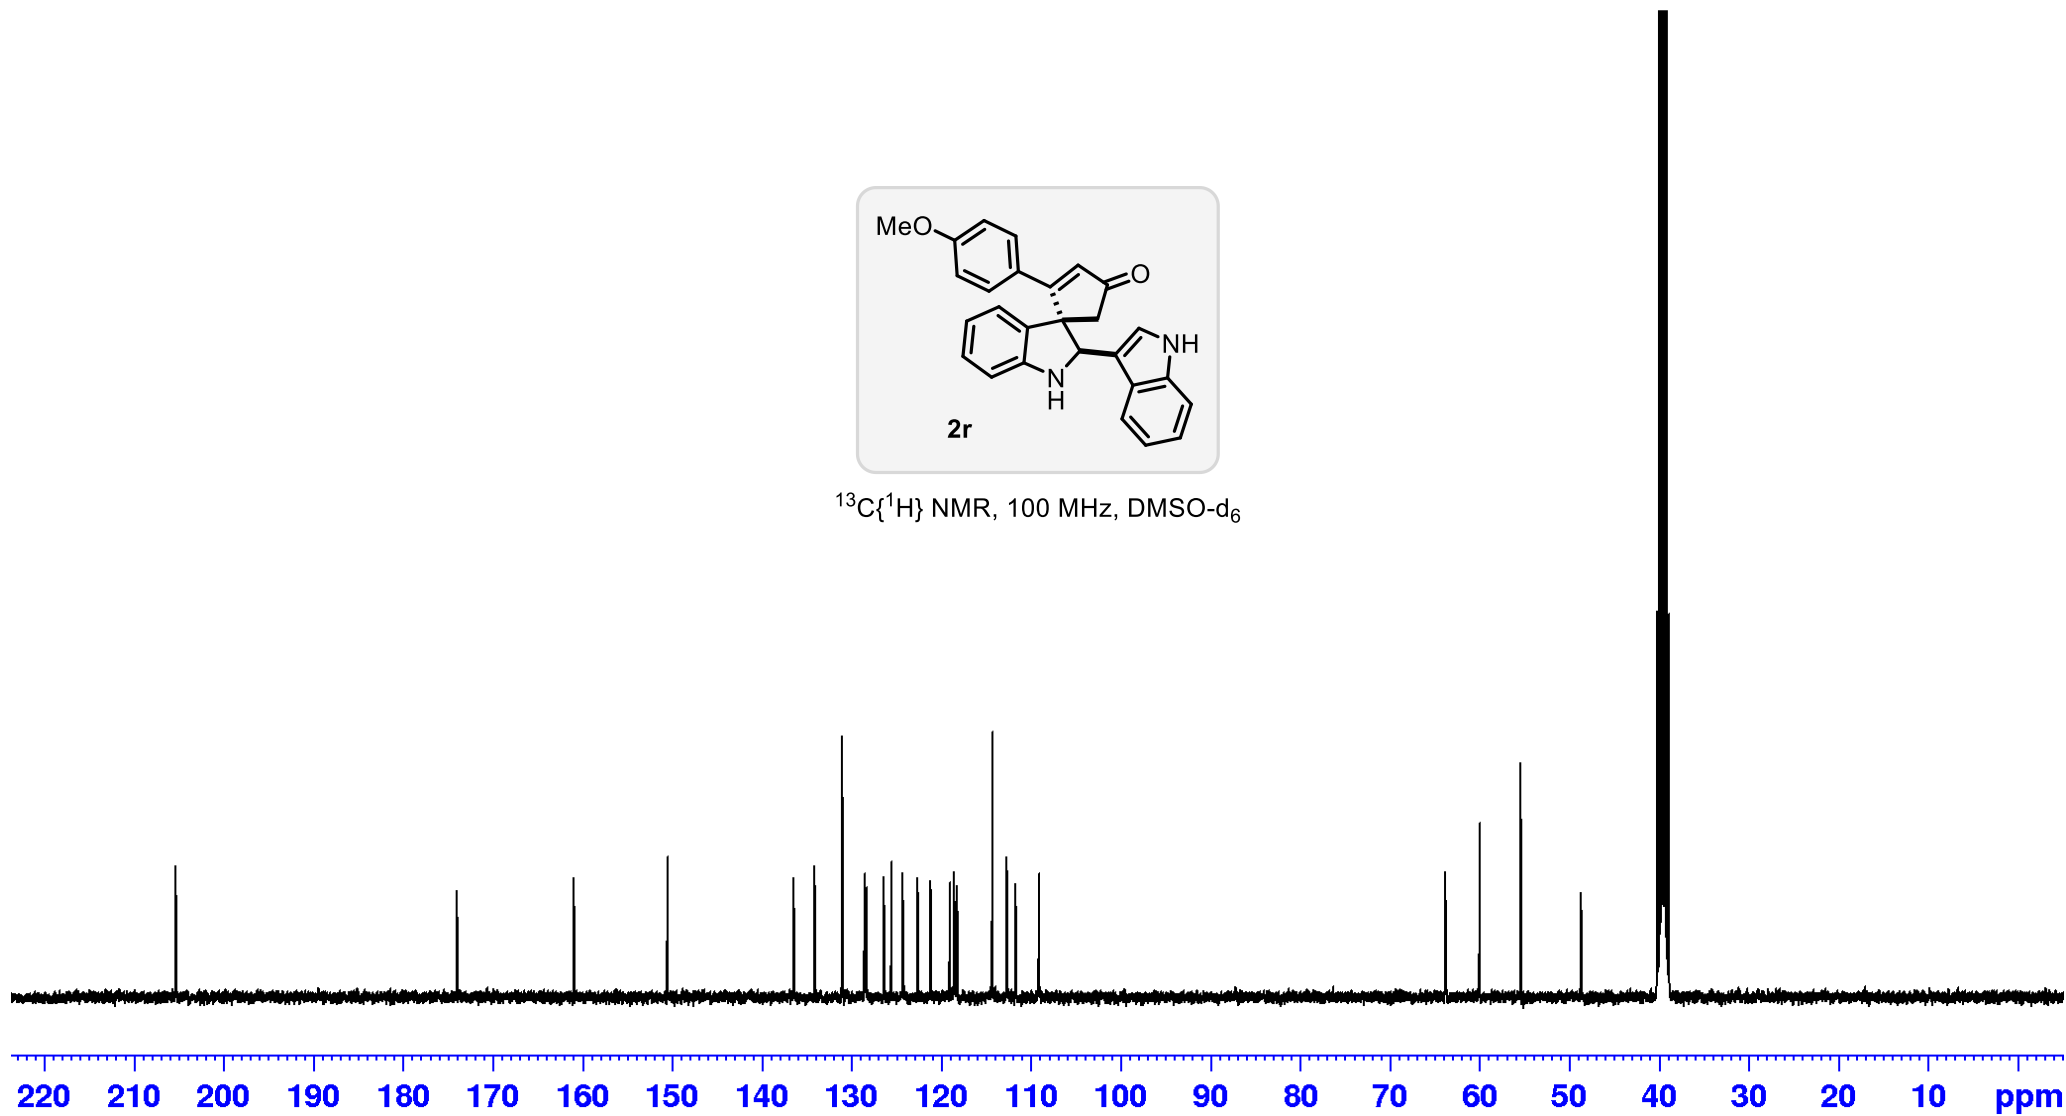

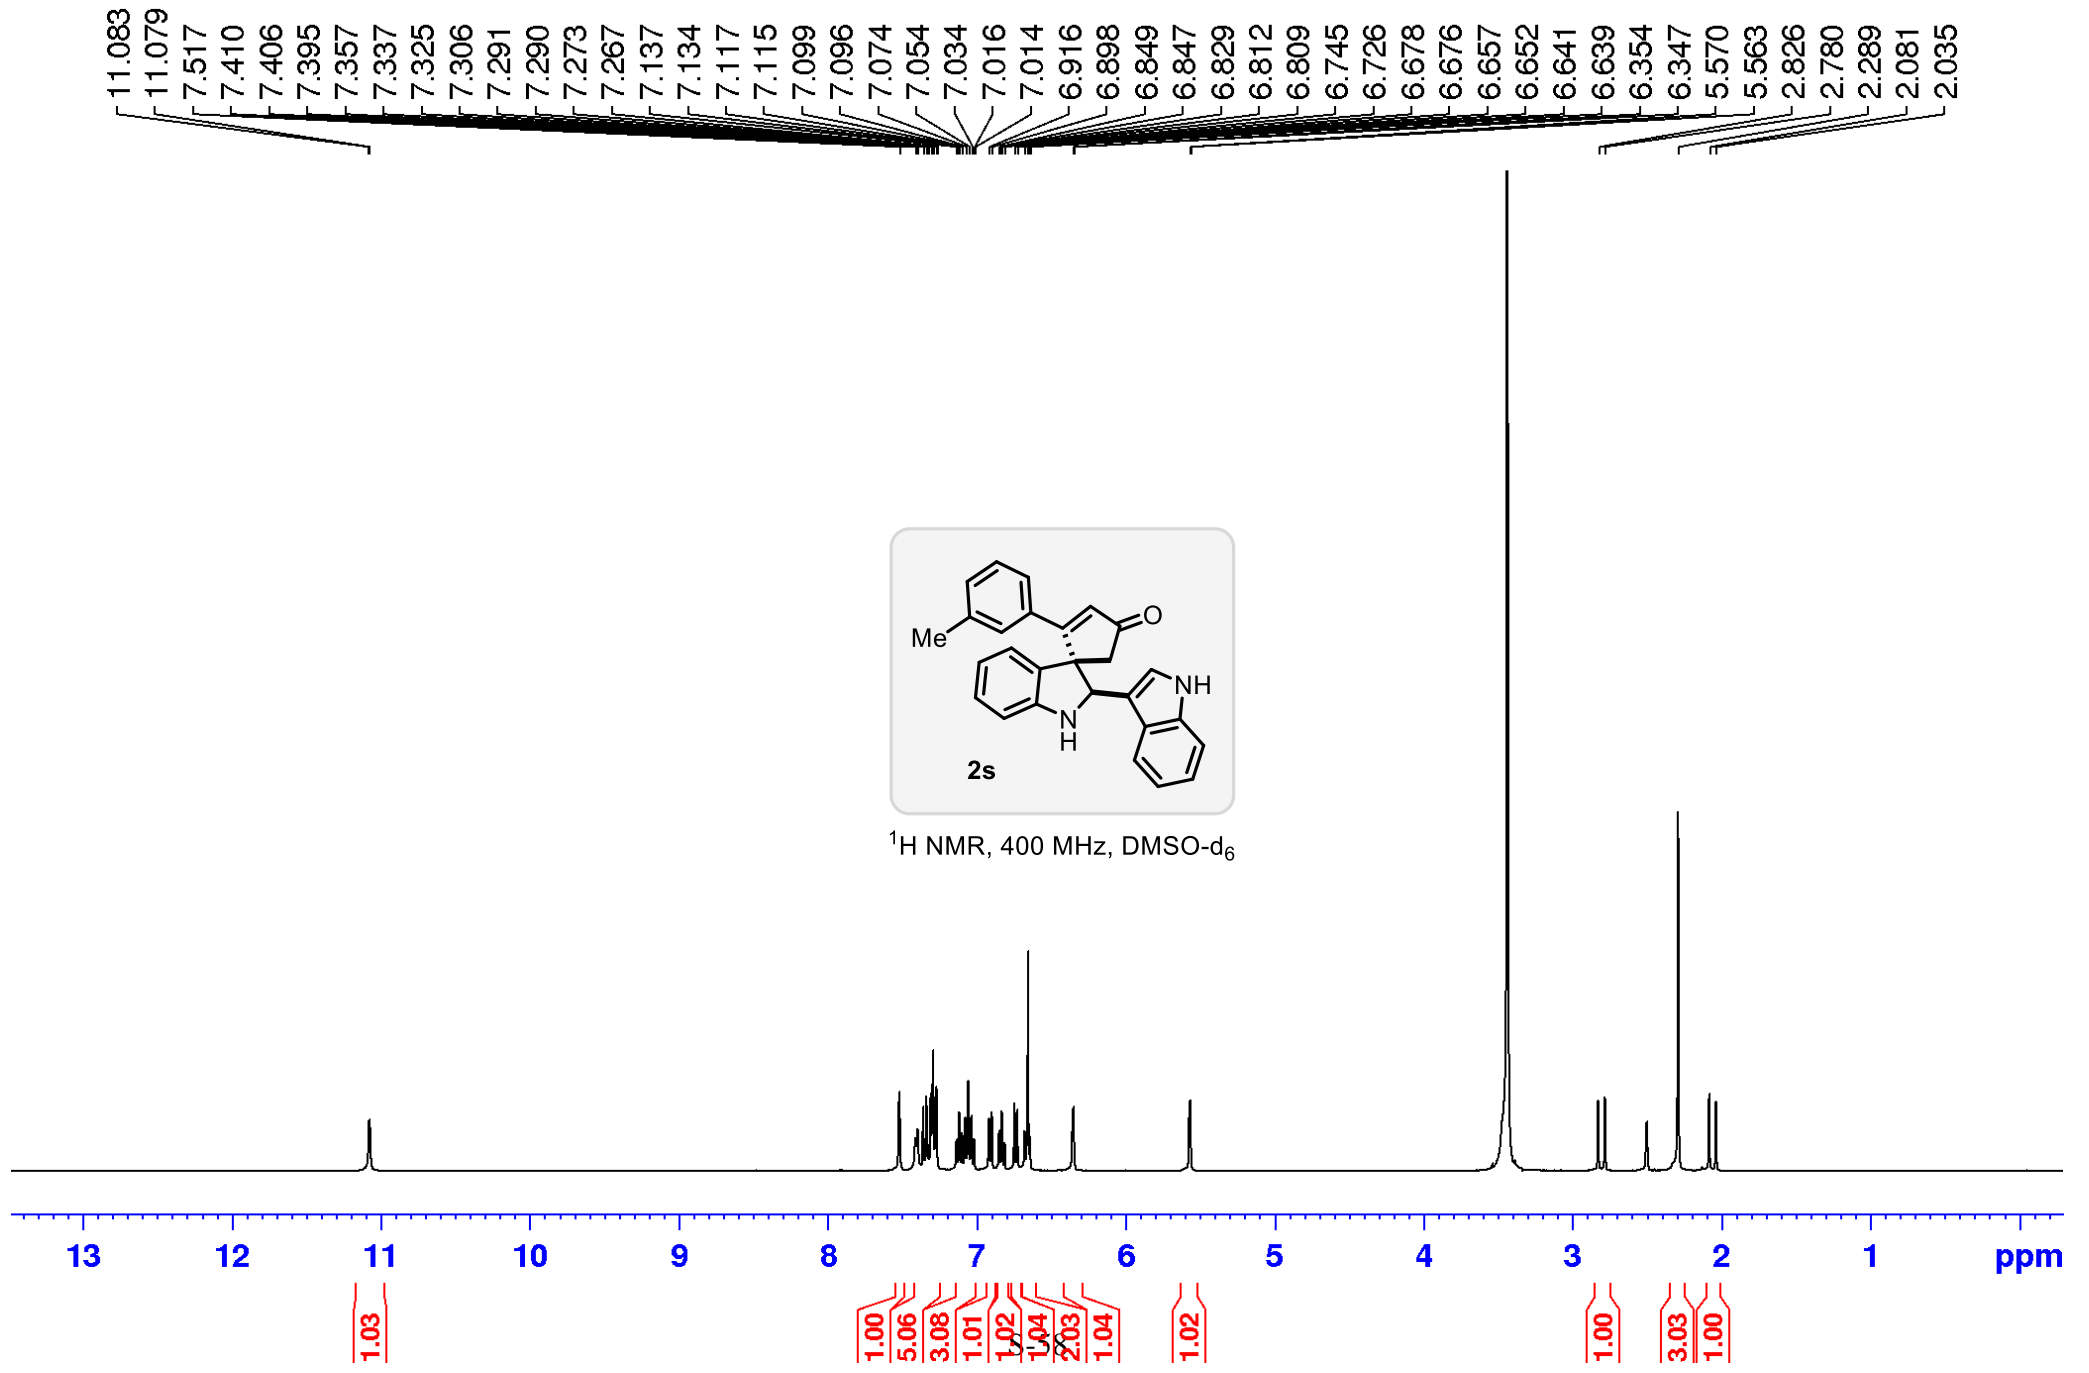

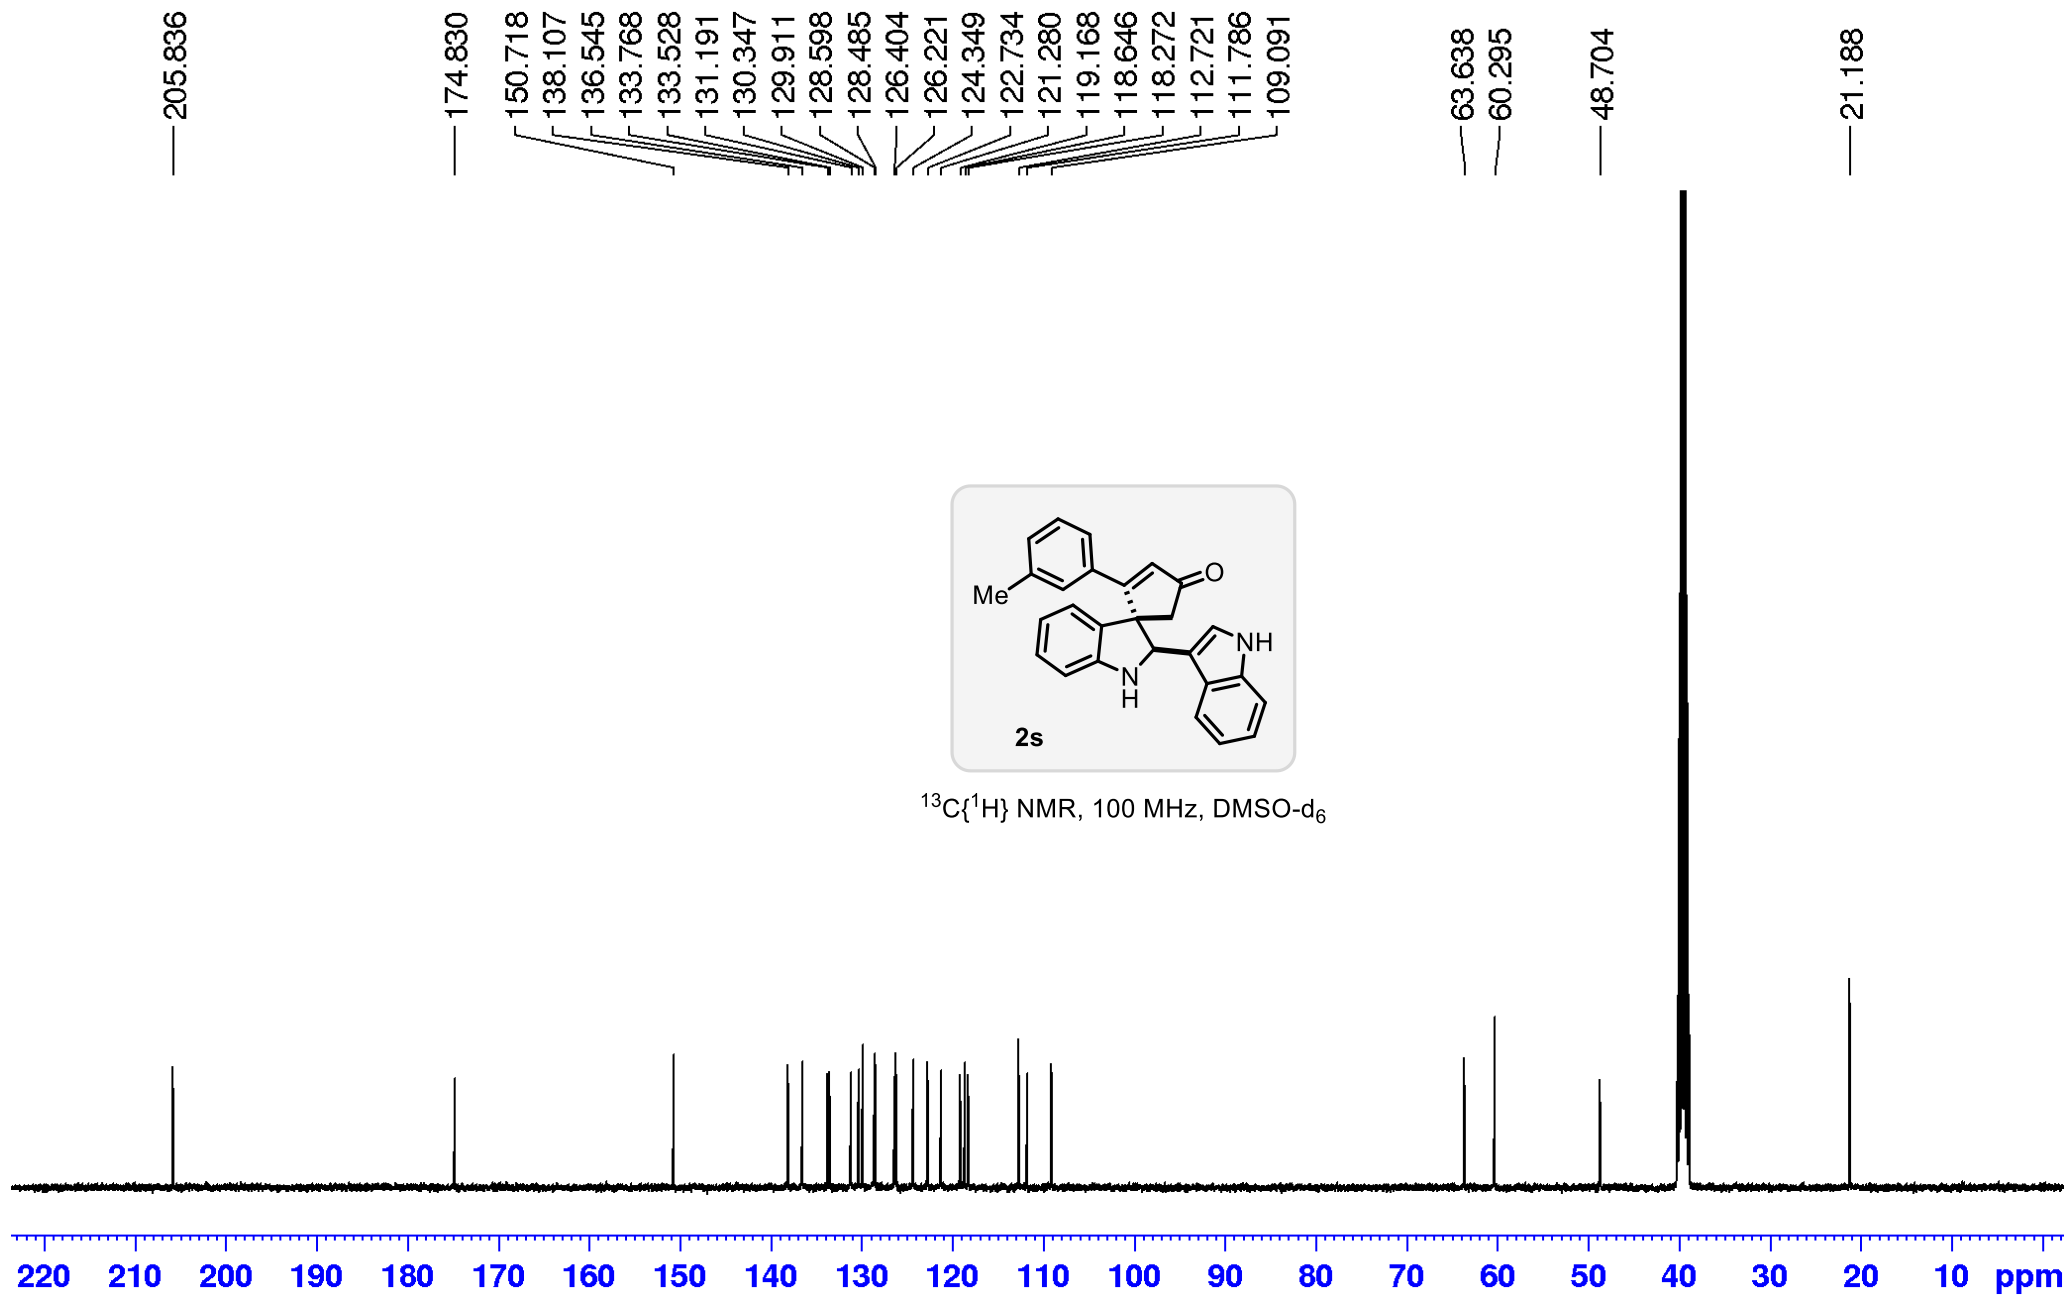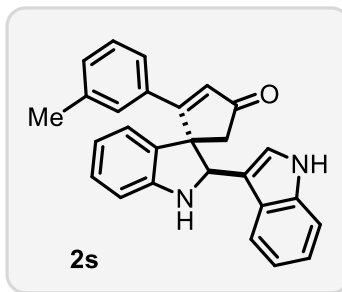

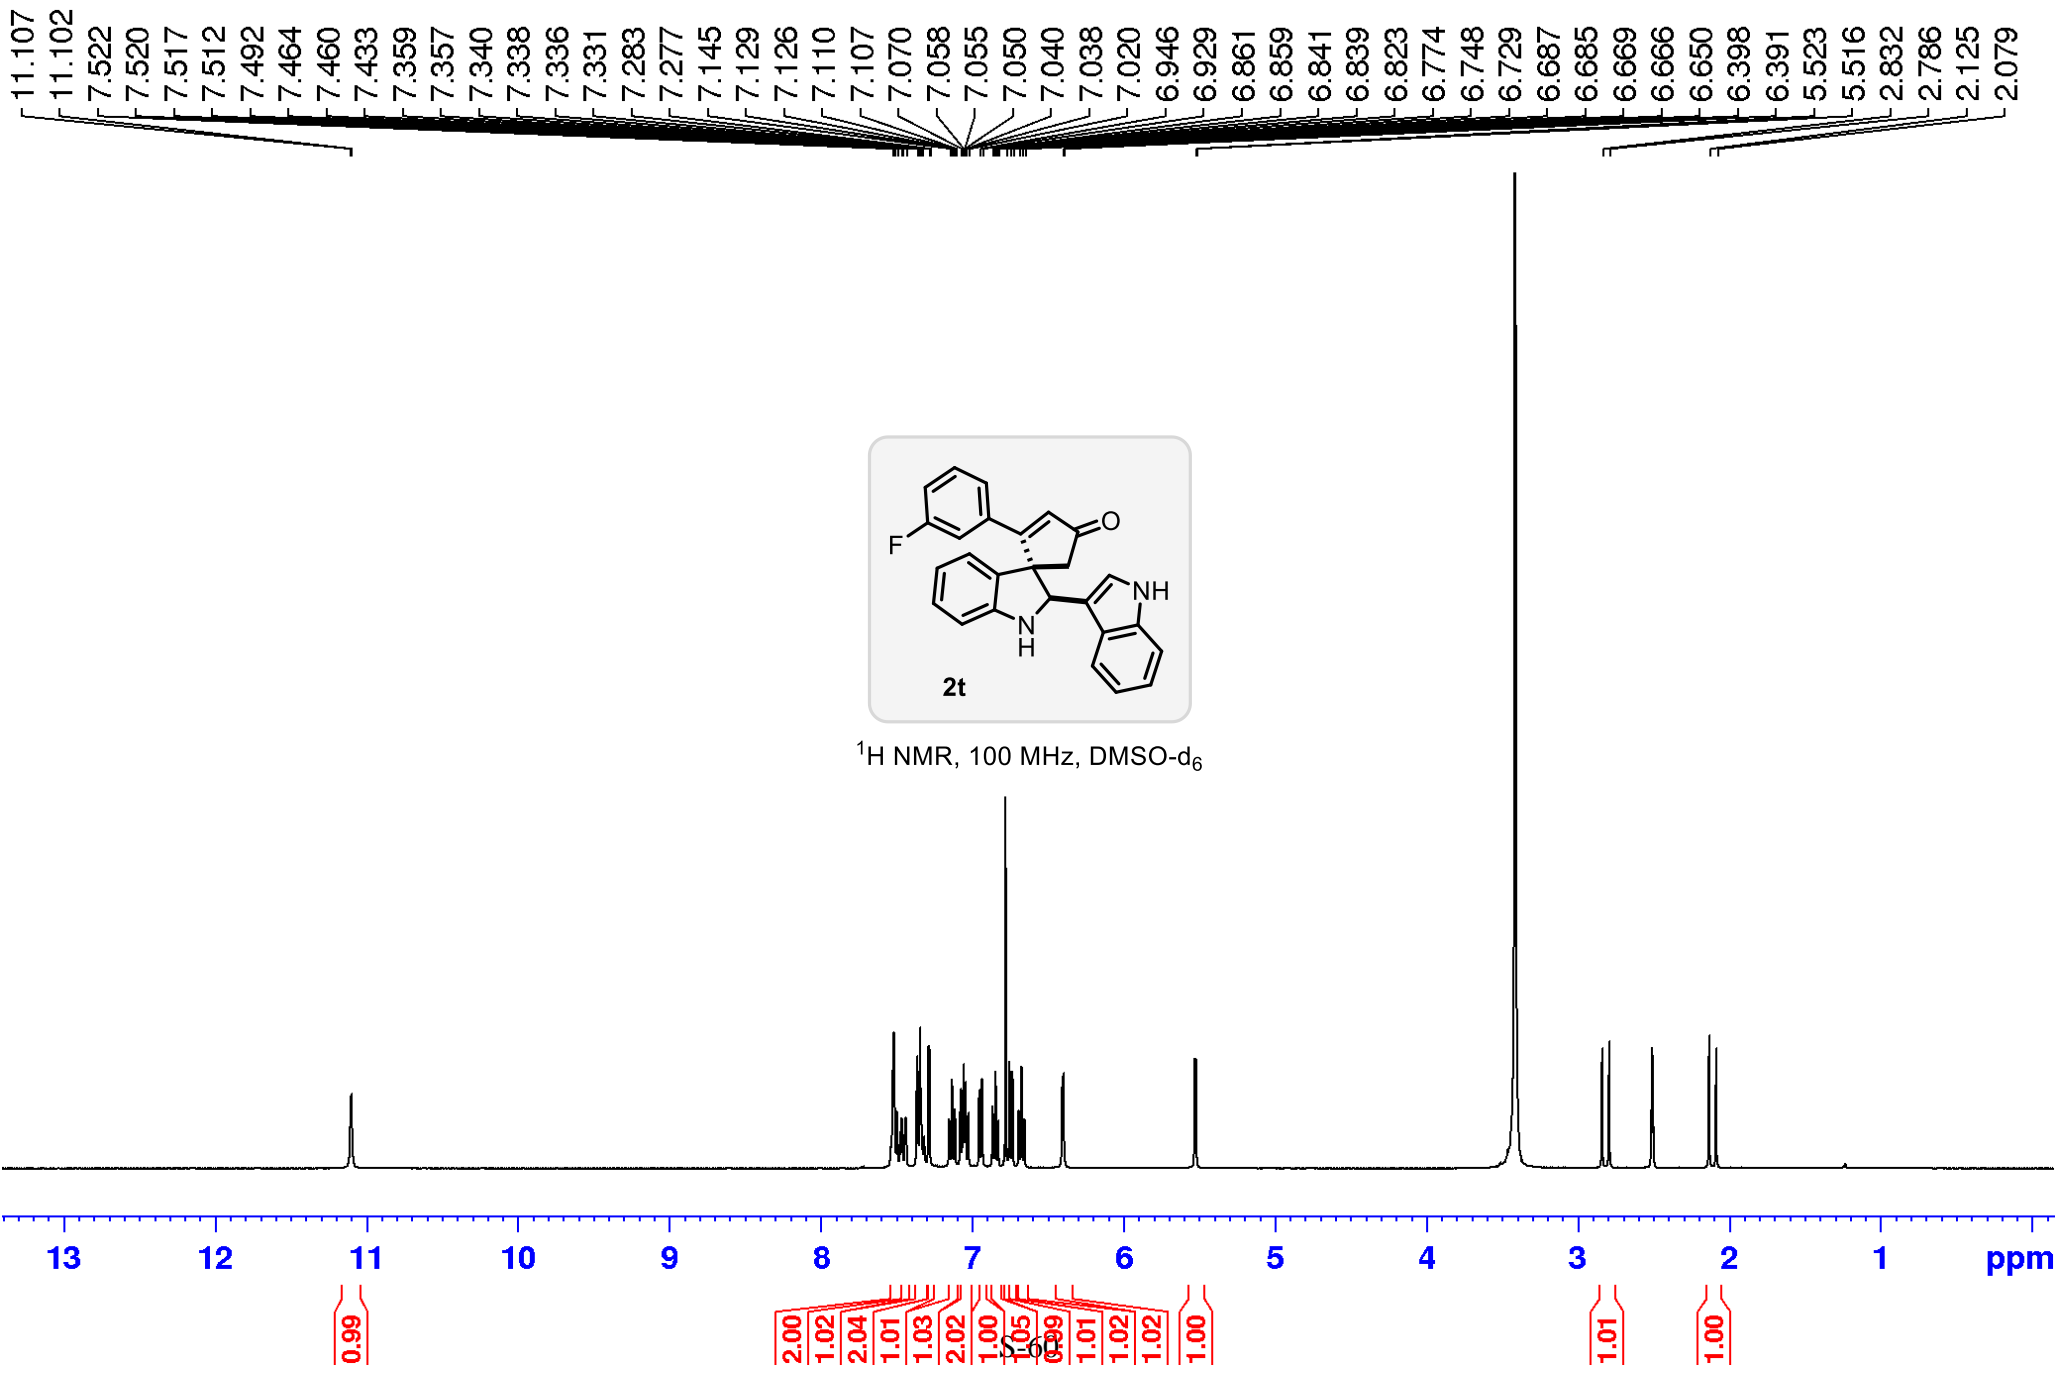

-107.002  
-107.014  
-107.027  
-107.043

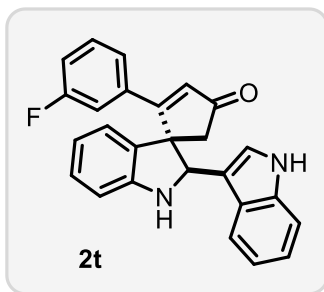

$^{19}\text{F}$  NMR, 376 MHz,  $\text{DMSO-d}_6$

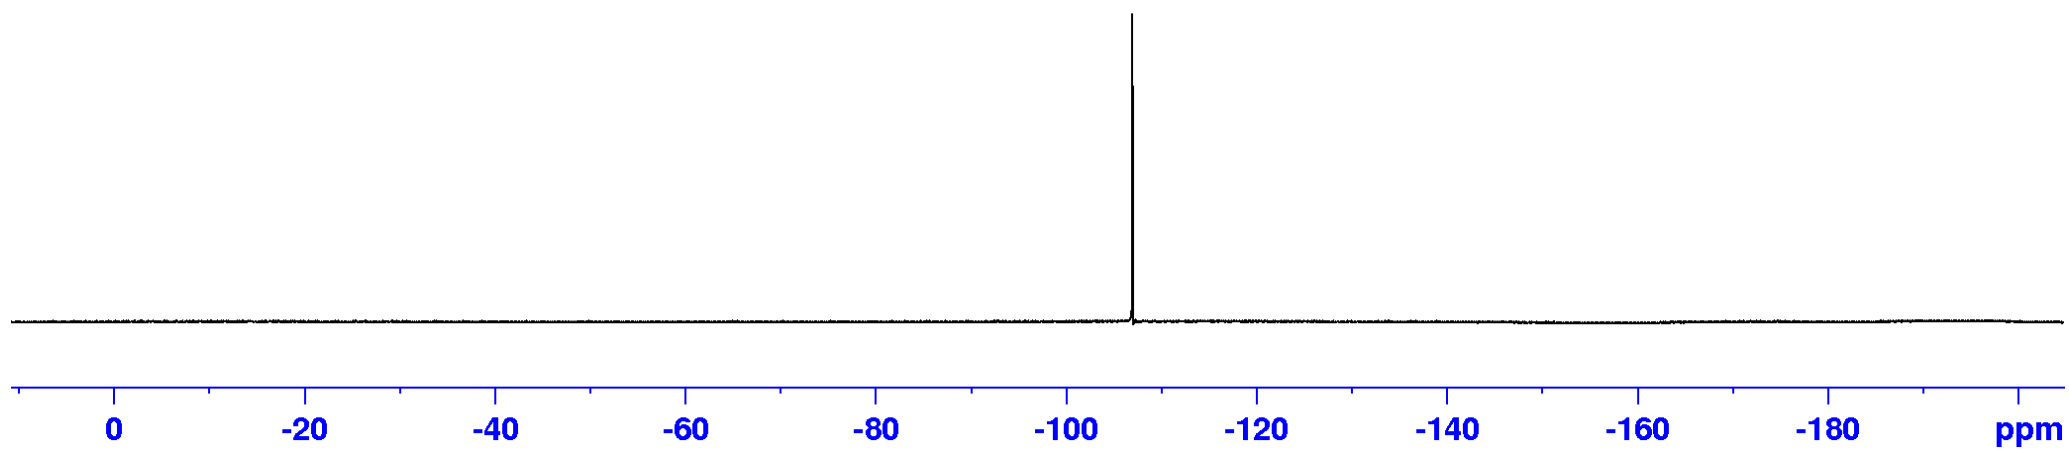

S-61

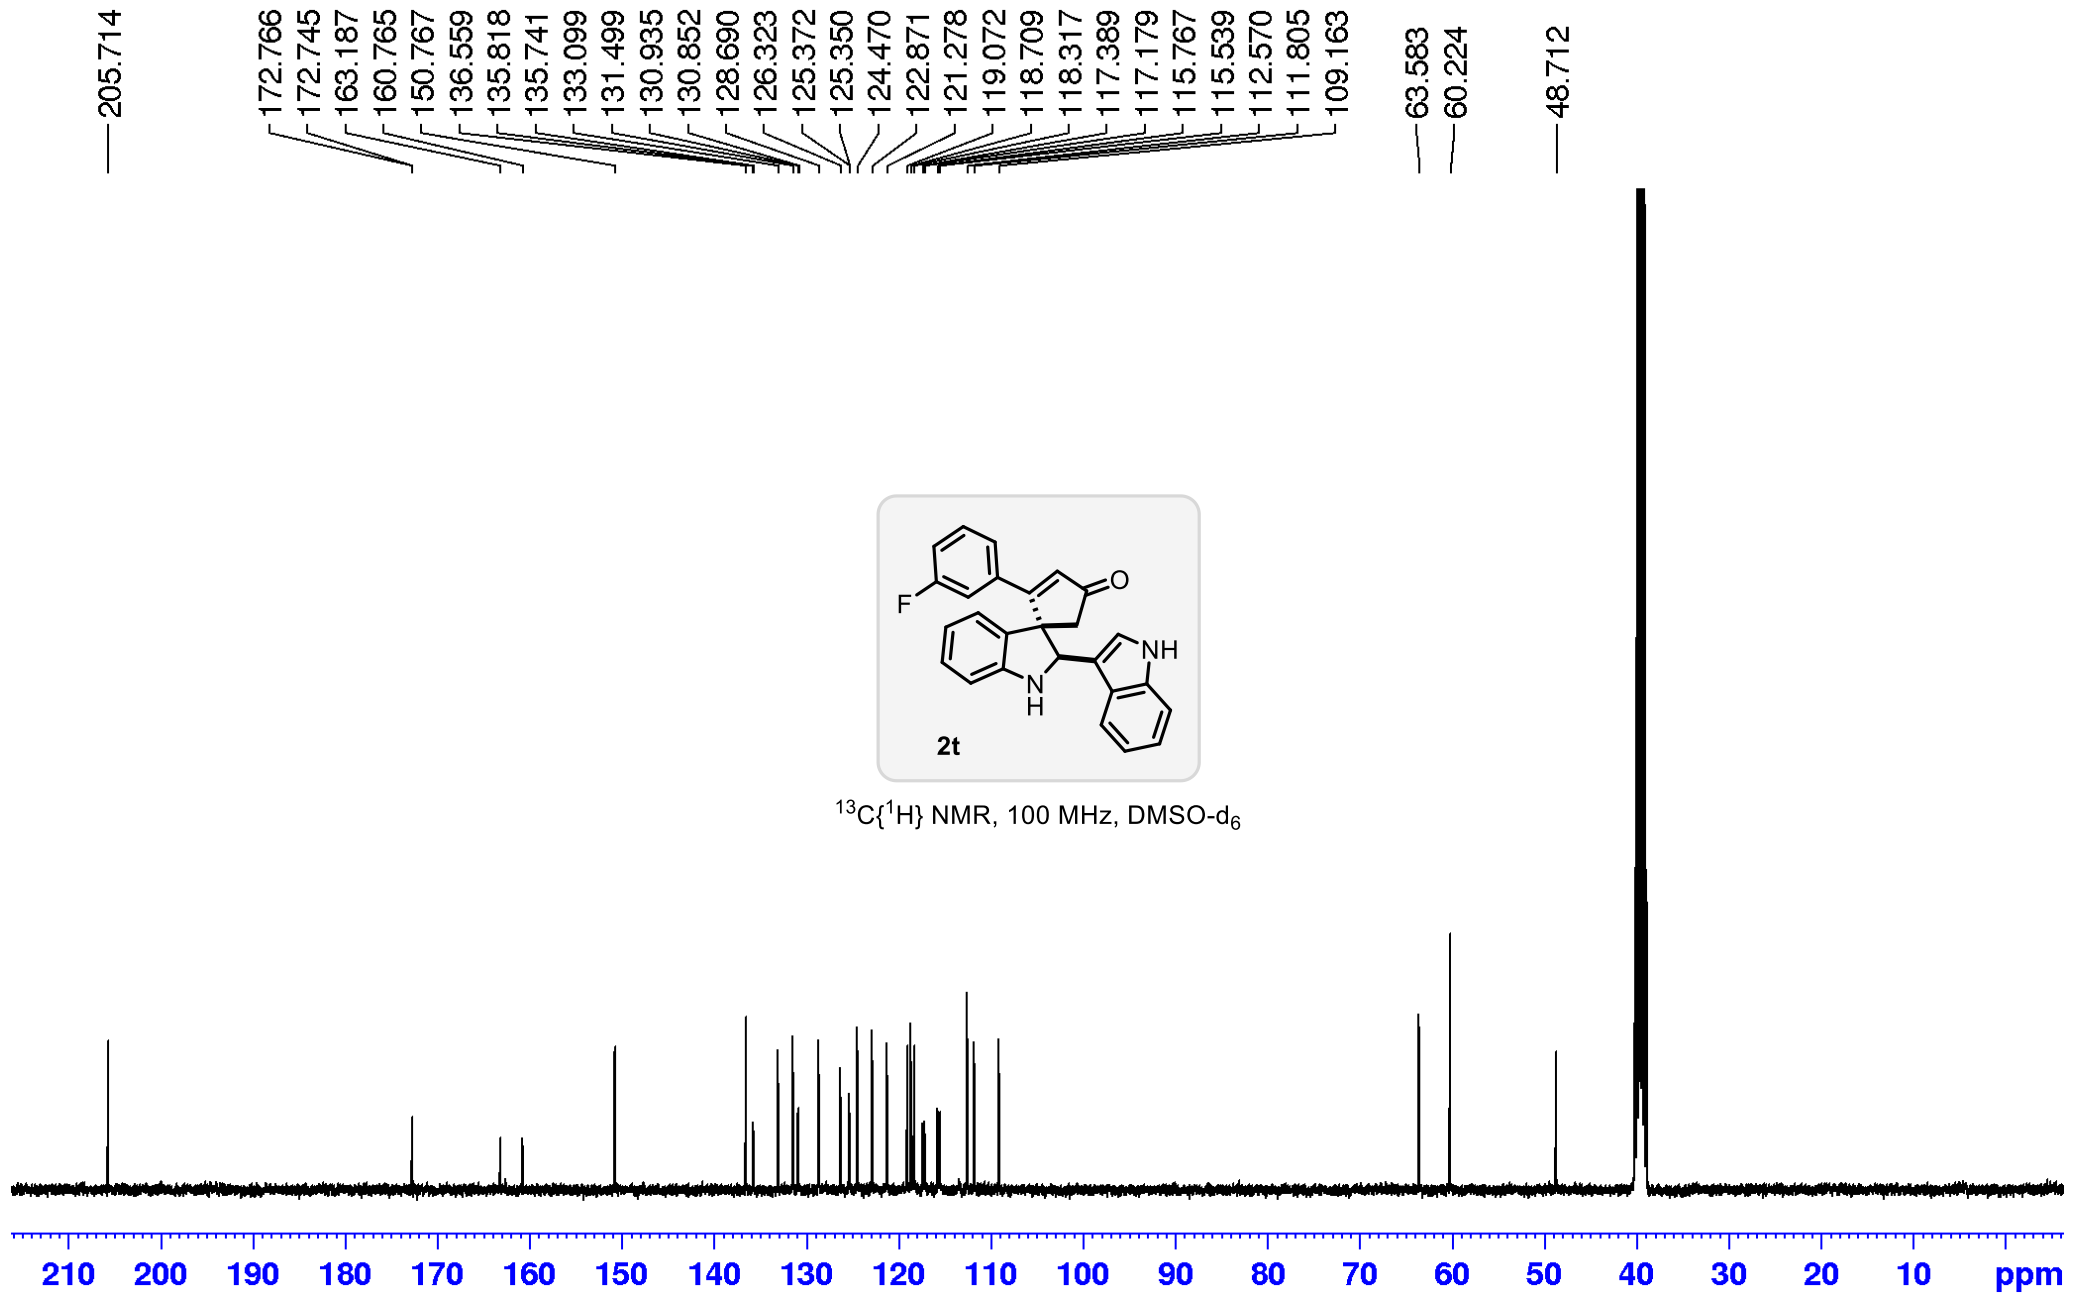

11.114  
11.109  
7.499  
7.474  
7.471  
7.446  
7.443  
7.373  
7.352  
7.278  
7.274  
7.259  
7.254  
7.181  
7.178  
7.163  
7.160  
7.144  
7.140  
7.136  
7.128  
7.120  
7.117  
7.108  
7.101  
7.098  
7.071  
7.068  
7.053  
7.051  
7.033  
7.031  
7.007  
7.004  
6.988  
6.986  
6.873  
6.871  
6.853  
6.707  
6.704  
6.701  
6.690  
6.688  
6.684  
6.672  
6.516  
6.508  
5.425  
2.749  
2.703  
2.147  
2.101

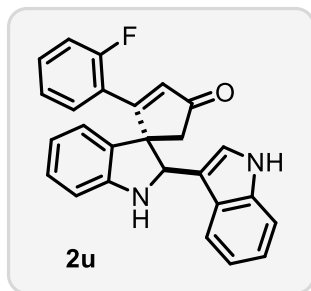

$^1\text{H}$  NMR, 100 MHz, DMSO- $d_6$

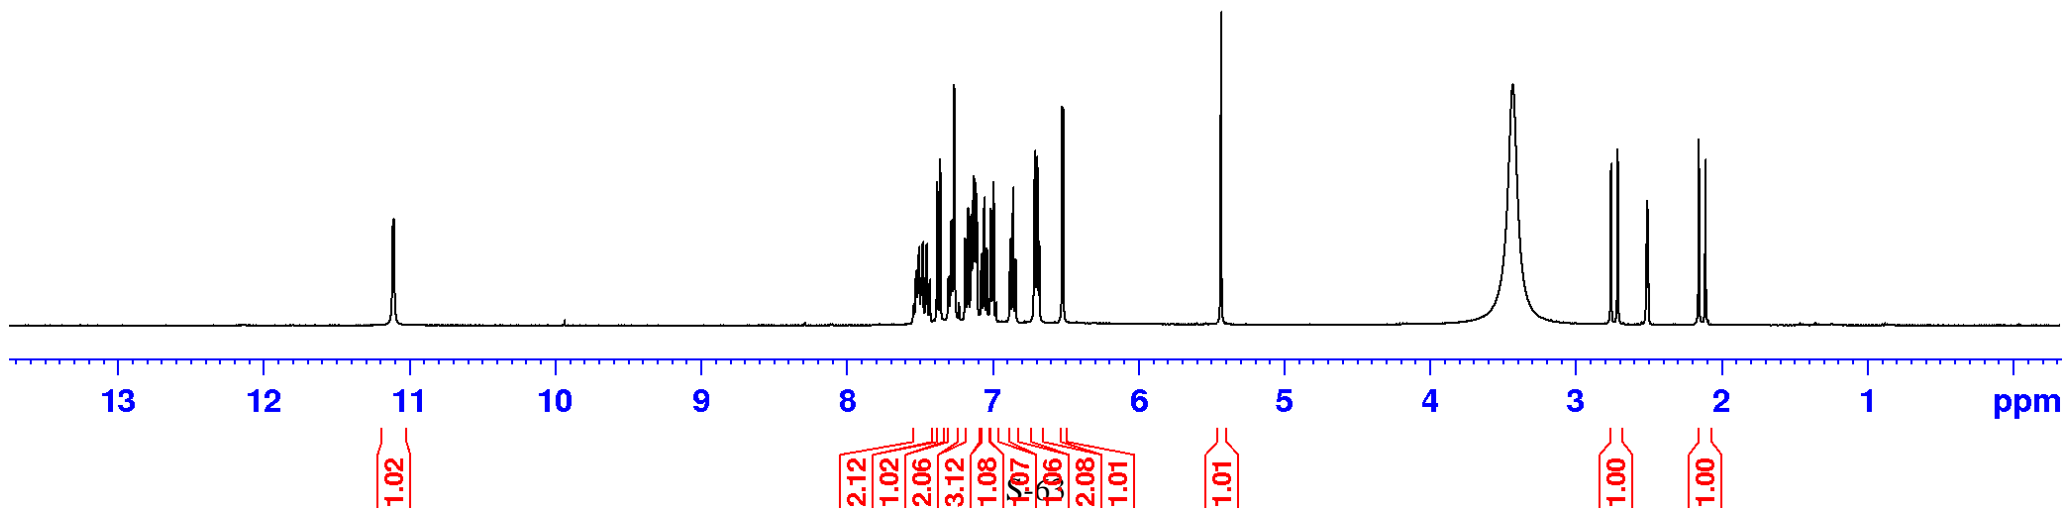

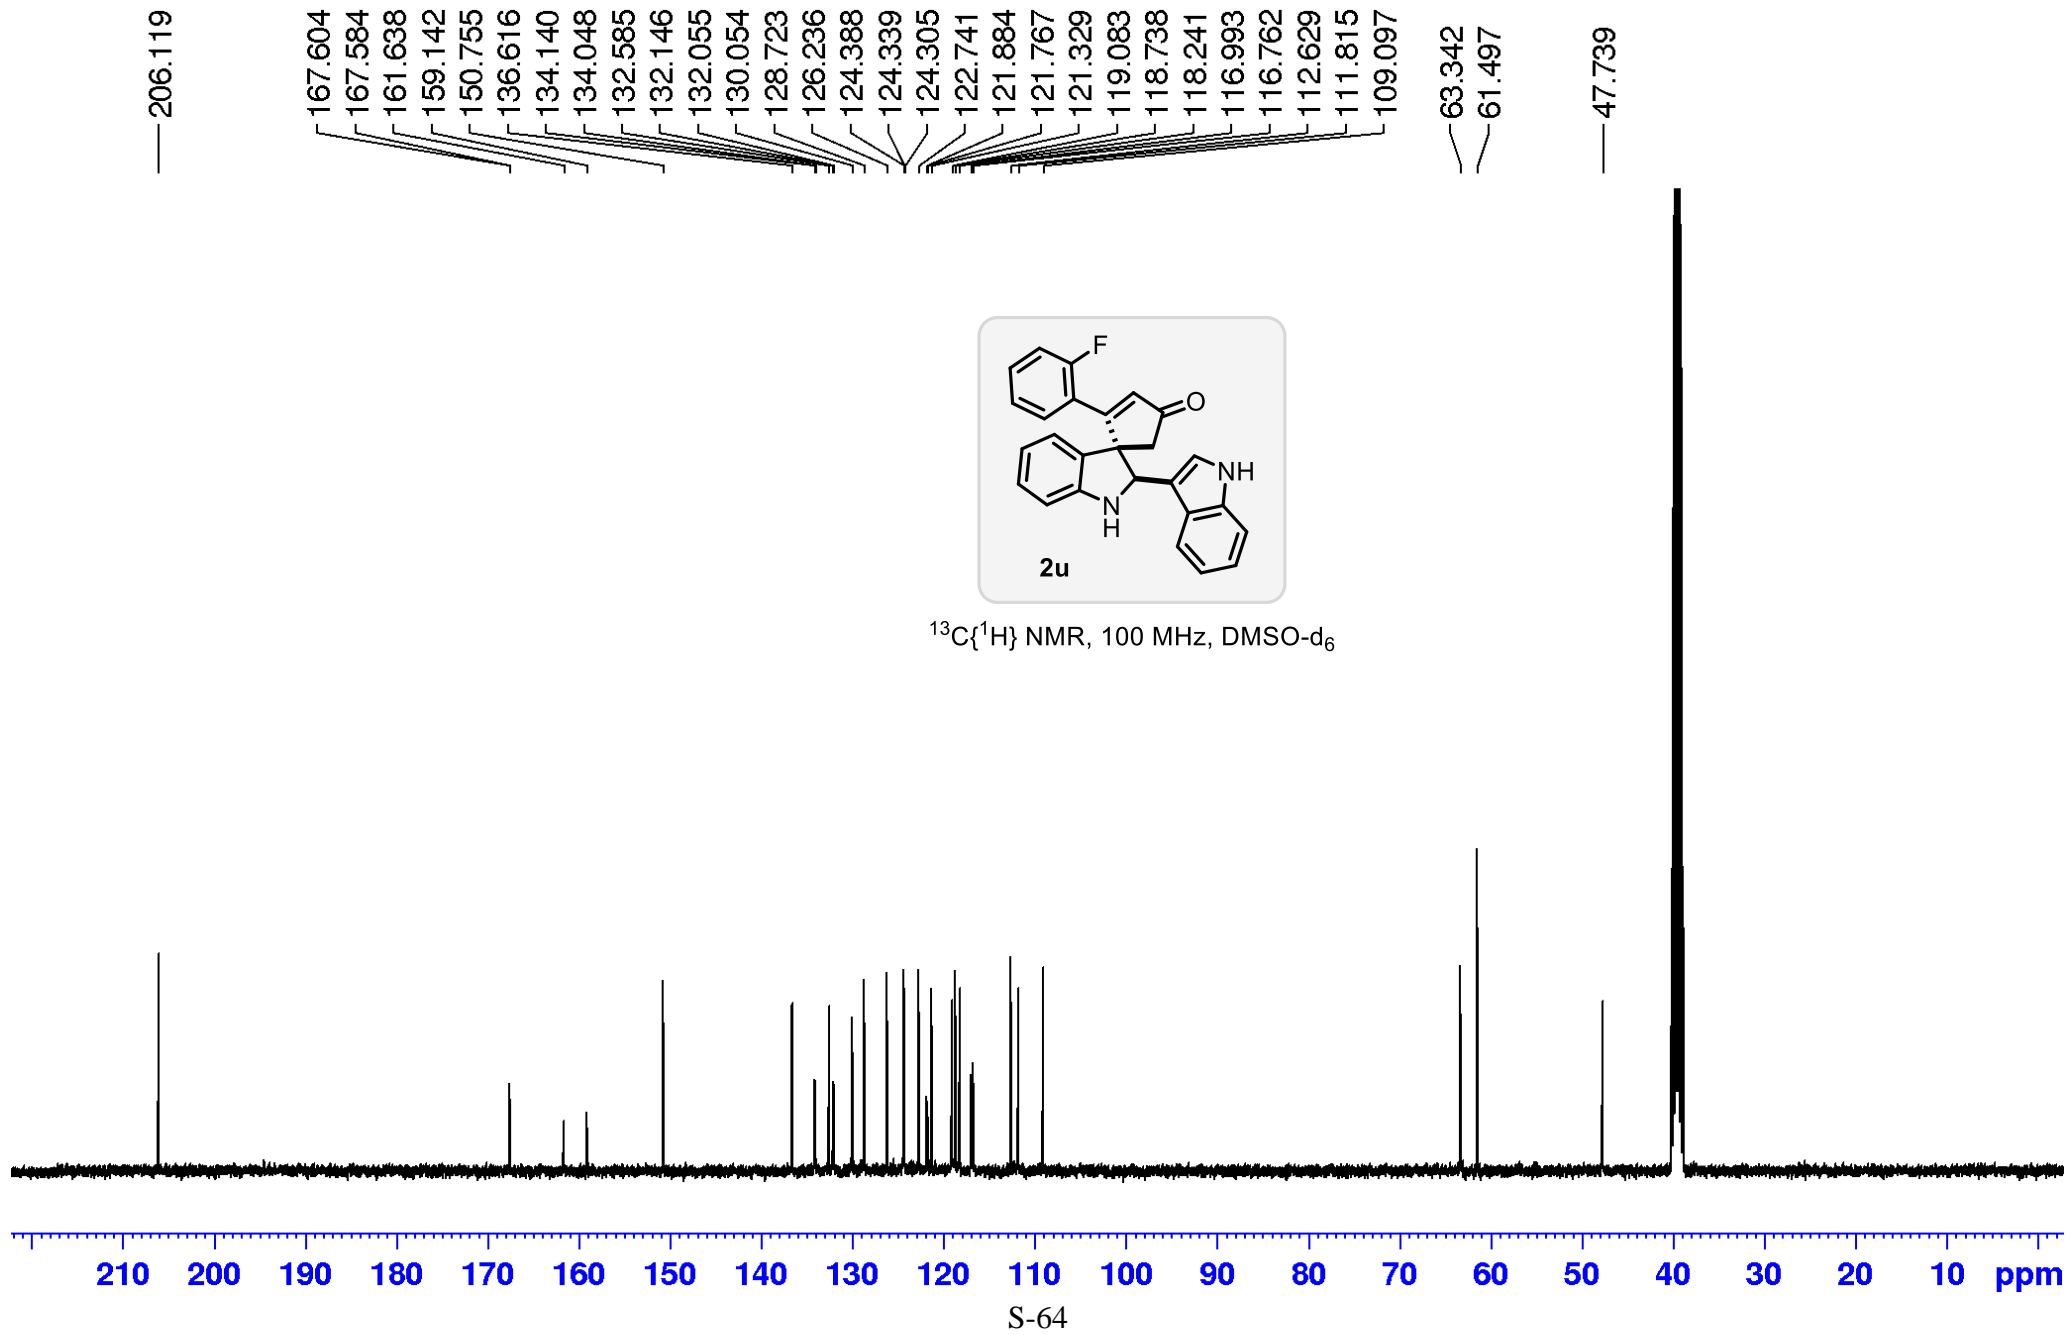



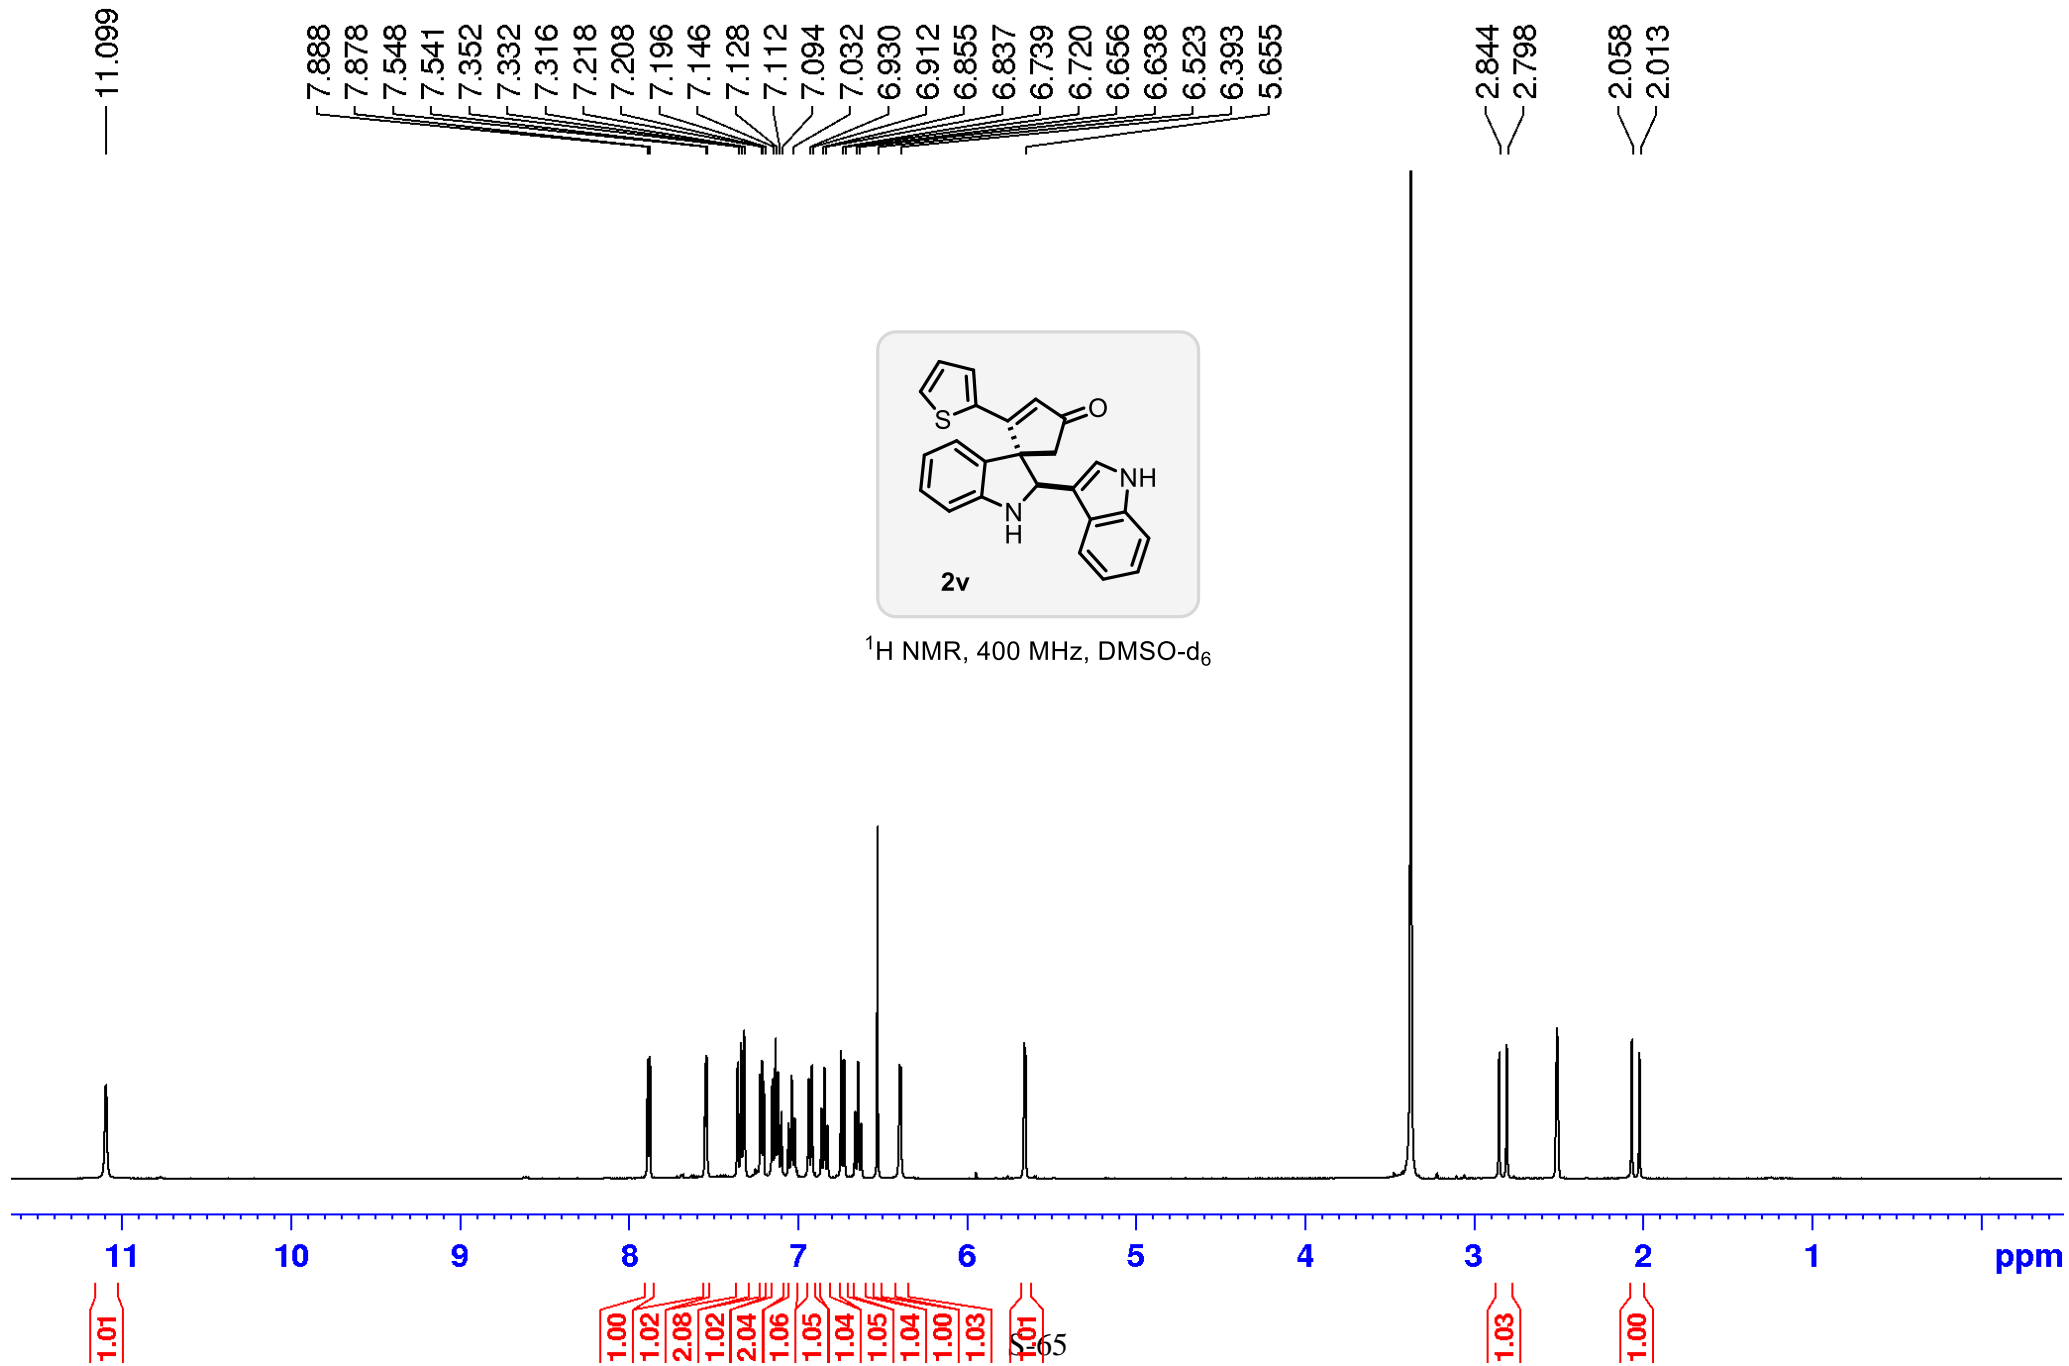

— 204.692

— 168.085  
— 151.310  
— 136.454  
— 136.225  
— 132.696  
— 132.069  
— 131.436  
— 128.665  
— 128.362  
— 127.821  
— 126.464  
— 124.426  
— 123.615  
— 121.187  
— 118.946  
— 118.617  
— 118.065  
— 112.329  
— 111.706  
— 109.021

— 64.623  
— 60.153

— 47.717

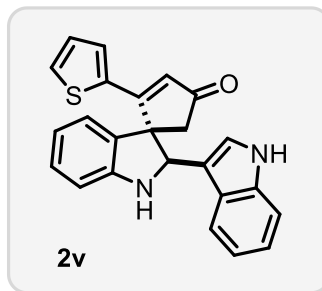

$^{13}\text{C}\{^1\text{H}\}$  NMR, 100 MHz, DMSO- $d_6$

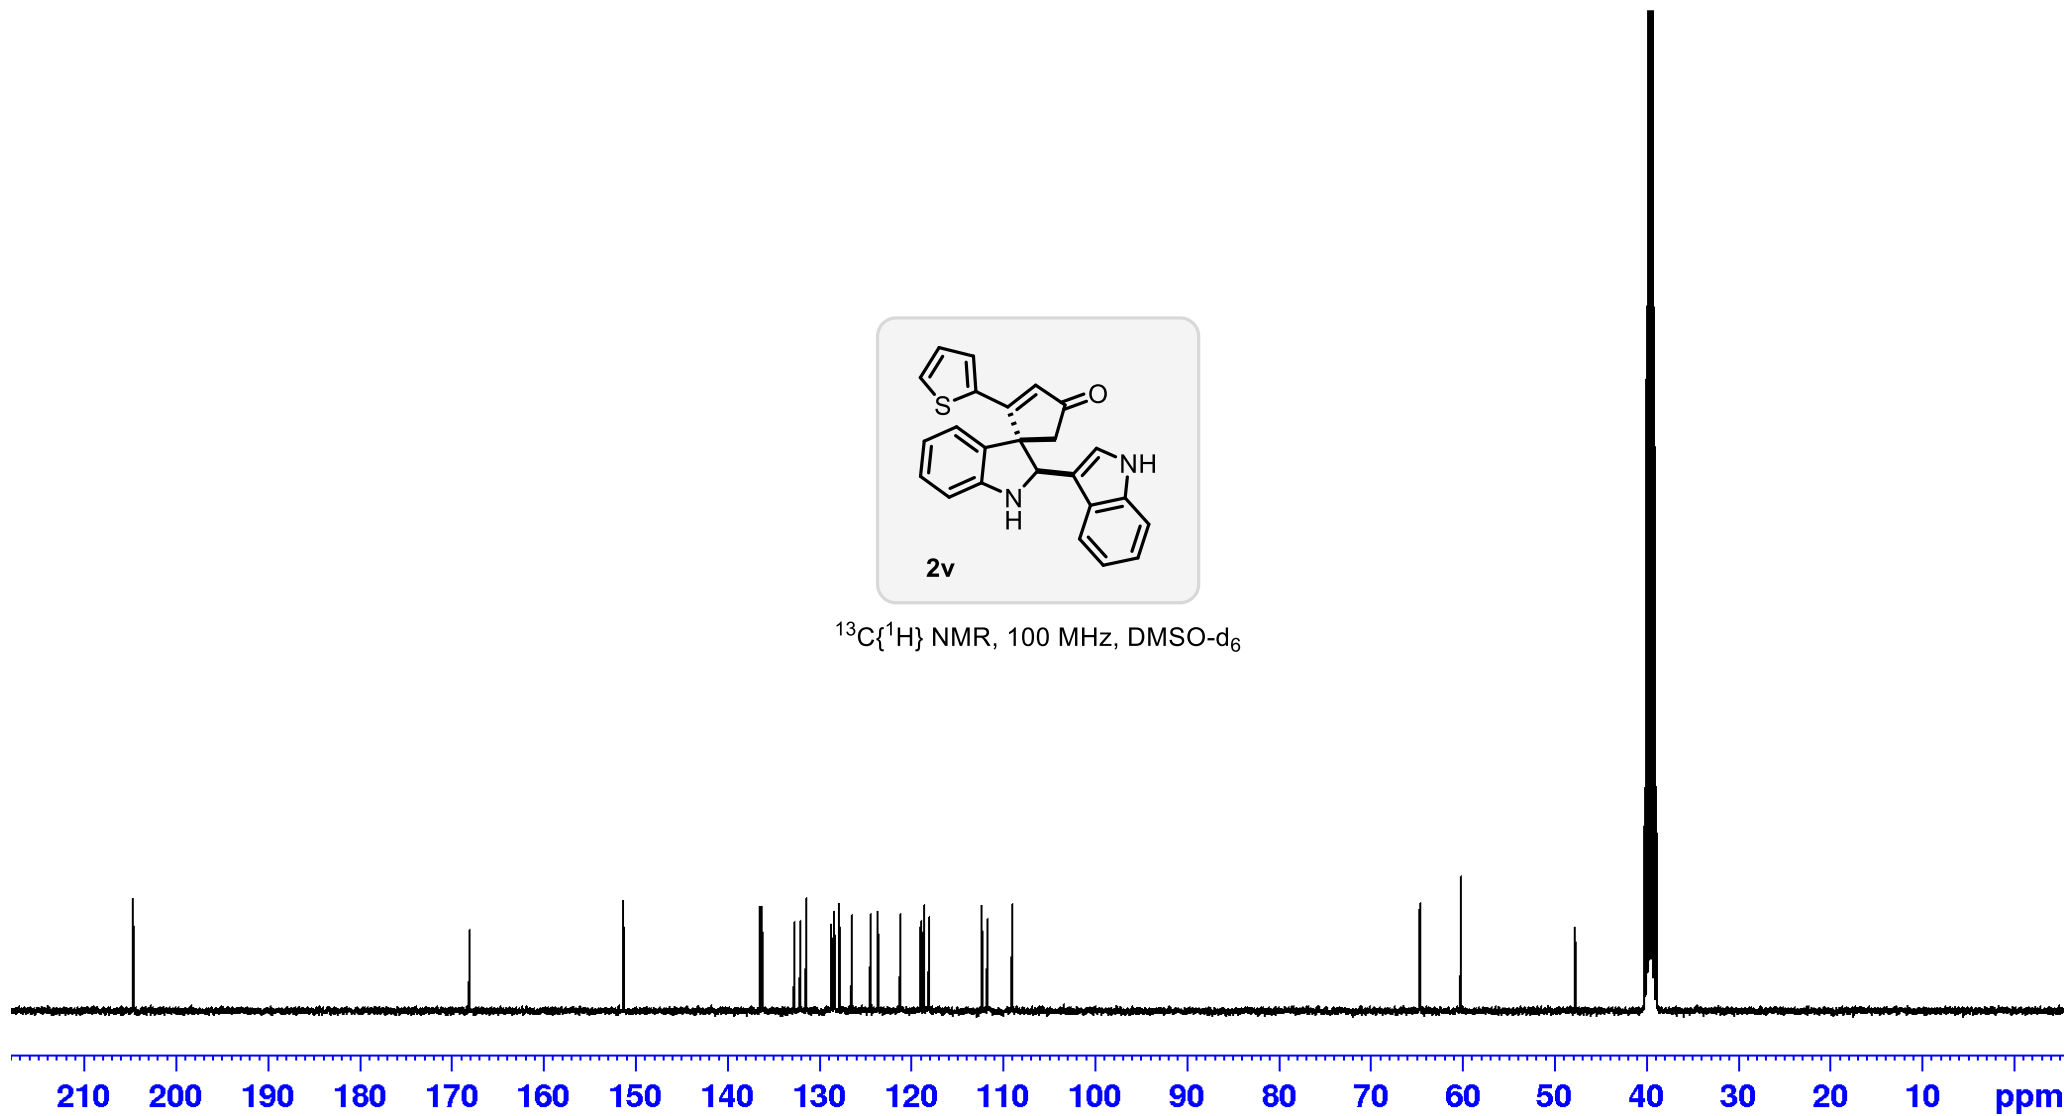

11.063  
11.059  
7.362  
7.342  
7.287  
7.282  
7.226  
7.206  
7.084  
7.082  
7.063  
7.044  
7.026  
6.890  
6.872  
6.853  
6.841  
6.823  
6.663  
6.658  
6.643  
6.640  
6.621  
6.192  
6.187  
5.957  
5.267  
5.262  
2.688  
2.668  
2.648  
2.643  
2.627  
2.526  
2.480  
2.275  
2.269  
2.250  
2.229  
2.225  
2.001  
1.955  
1.649  
1.584  
1.579  
1.320  
1.311  
1.302  
1.294  
1.289  
0.886  
0.869  
0.851

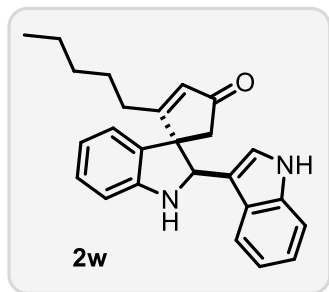

<sup>1</sup>H NMR, 400 MHz, DMSO-d<sub>6</sub>

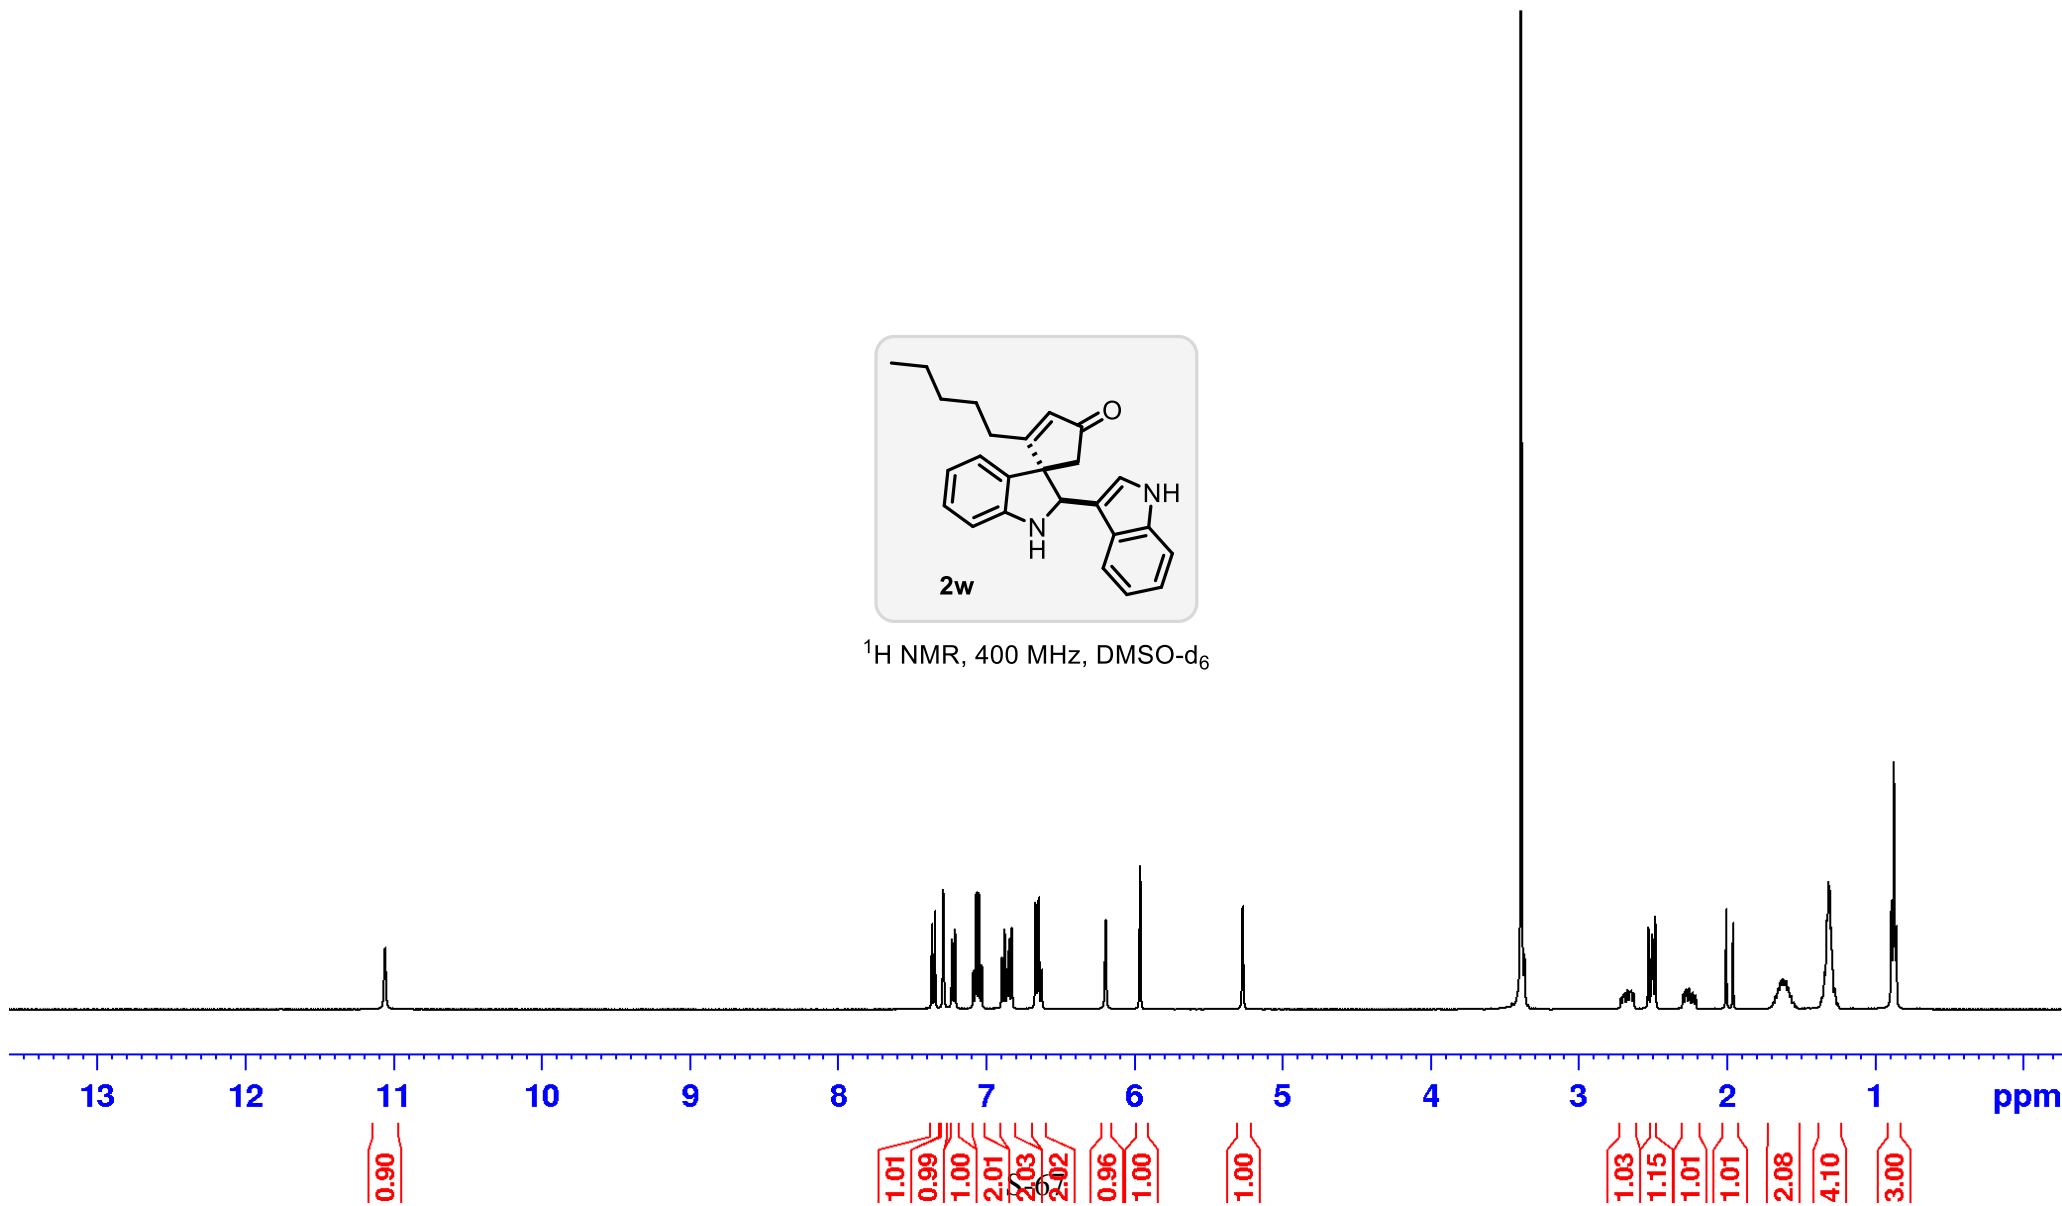

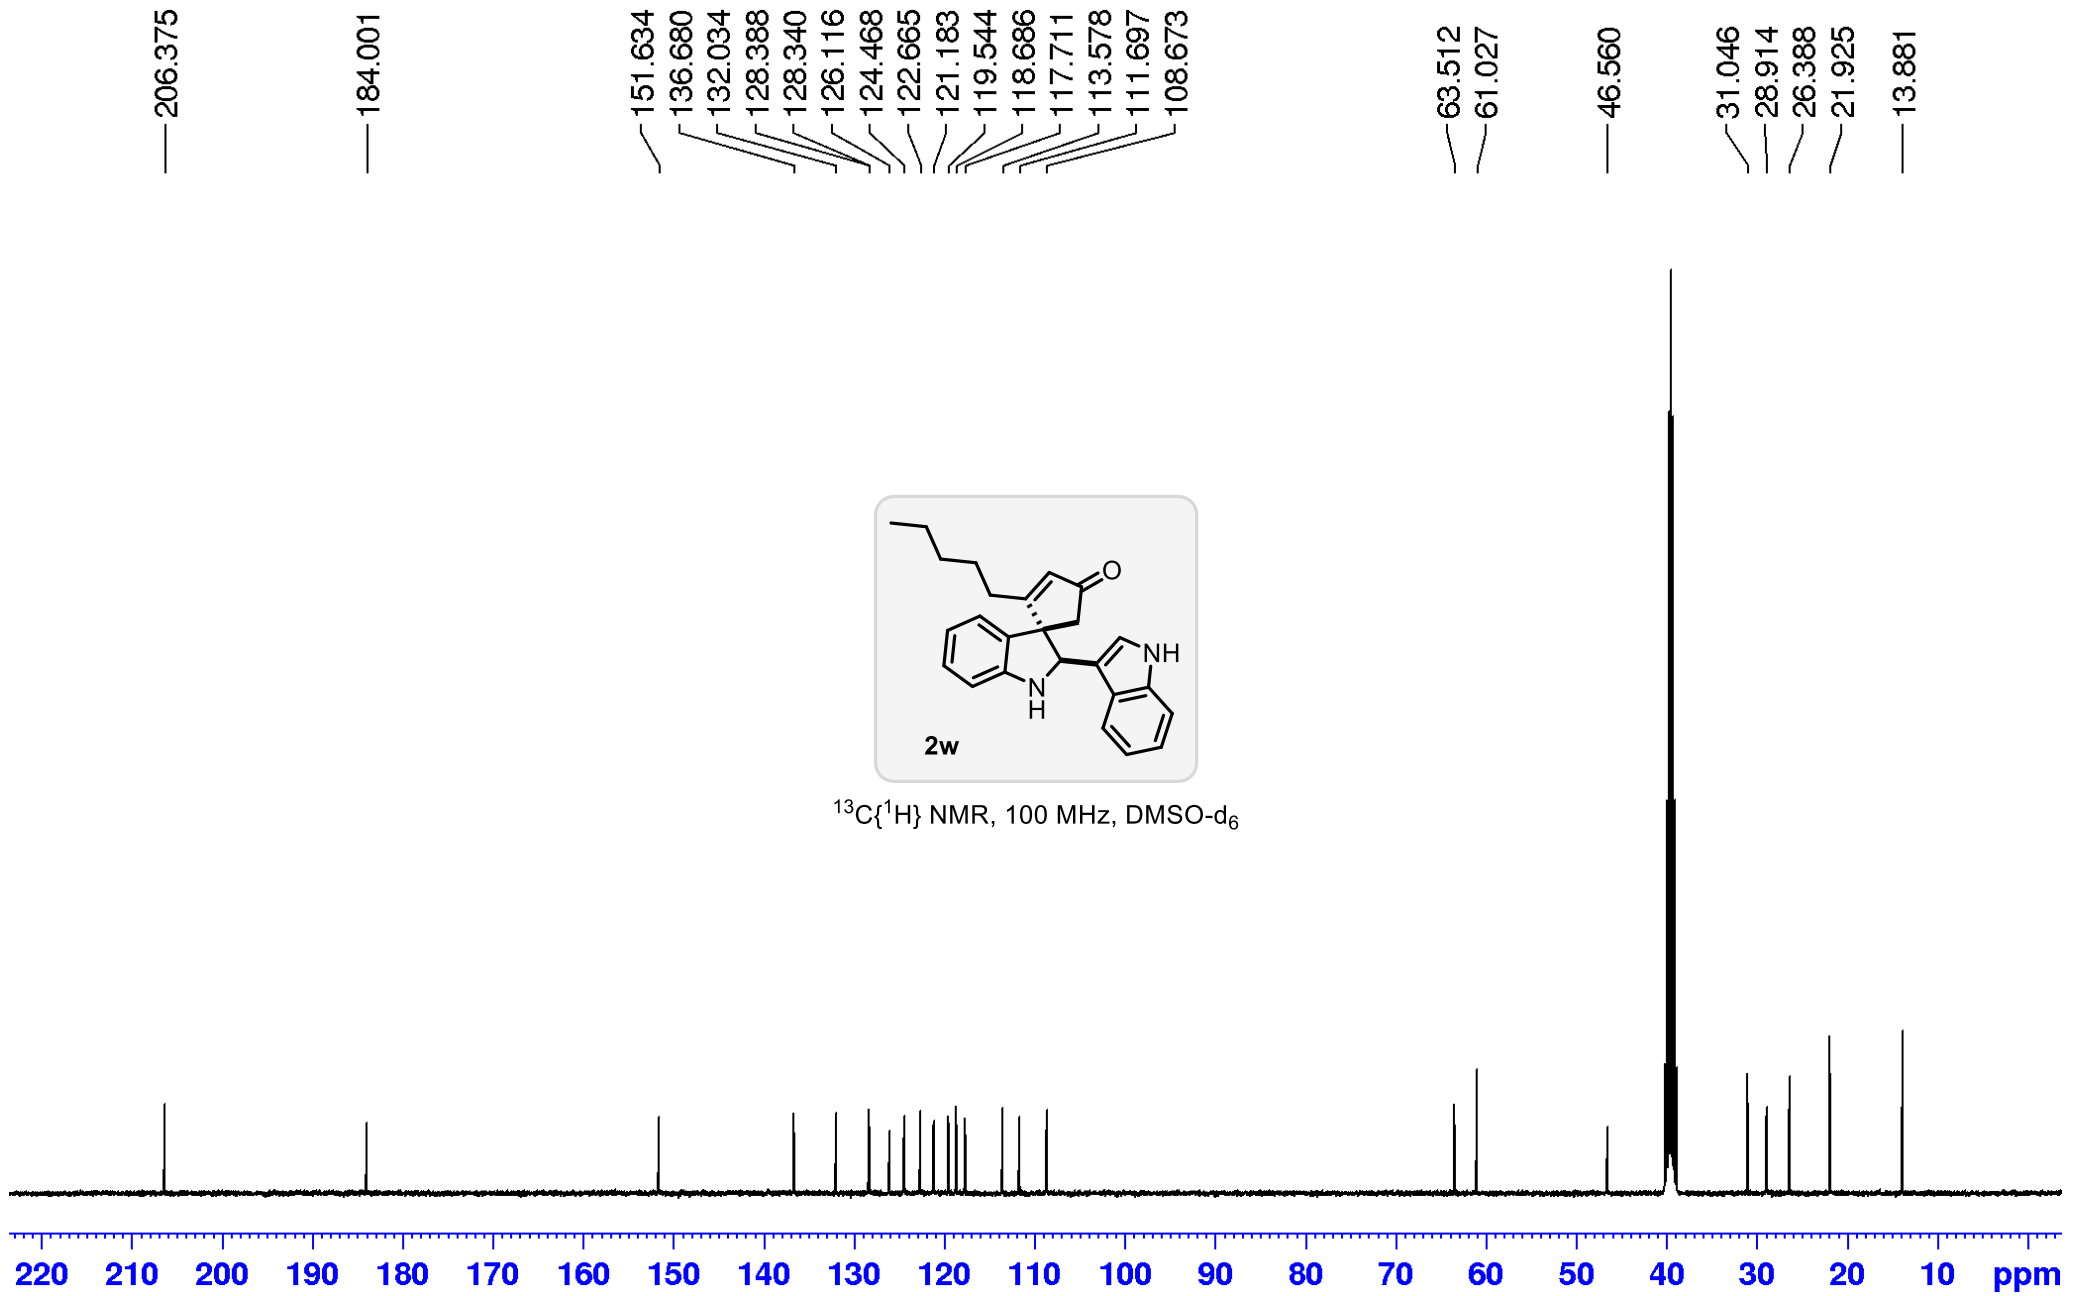

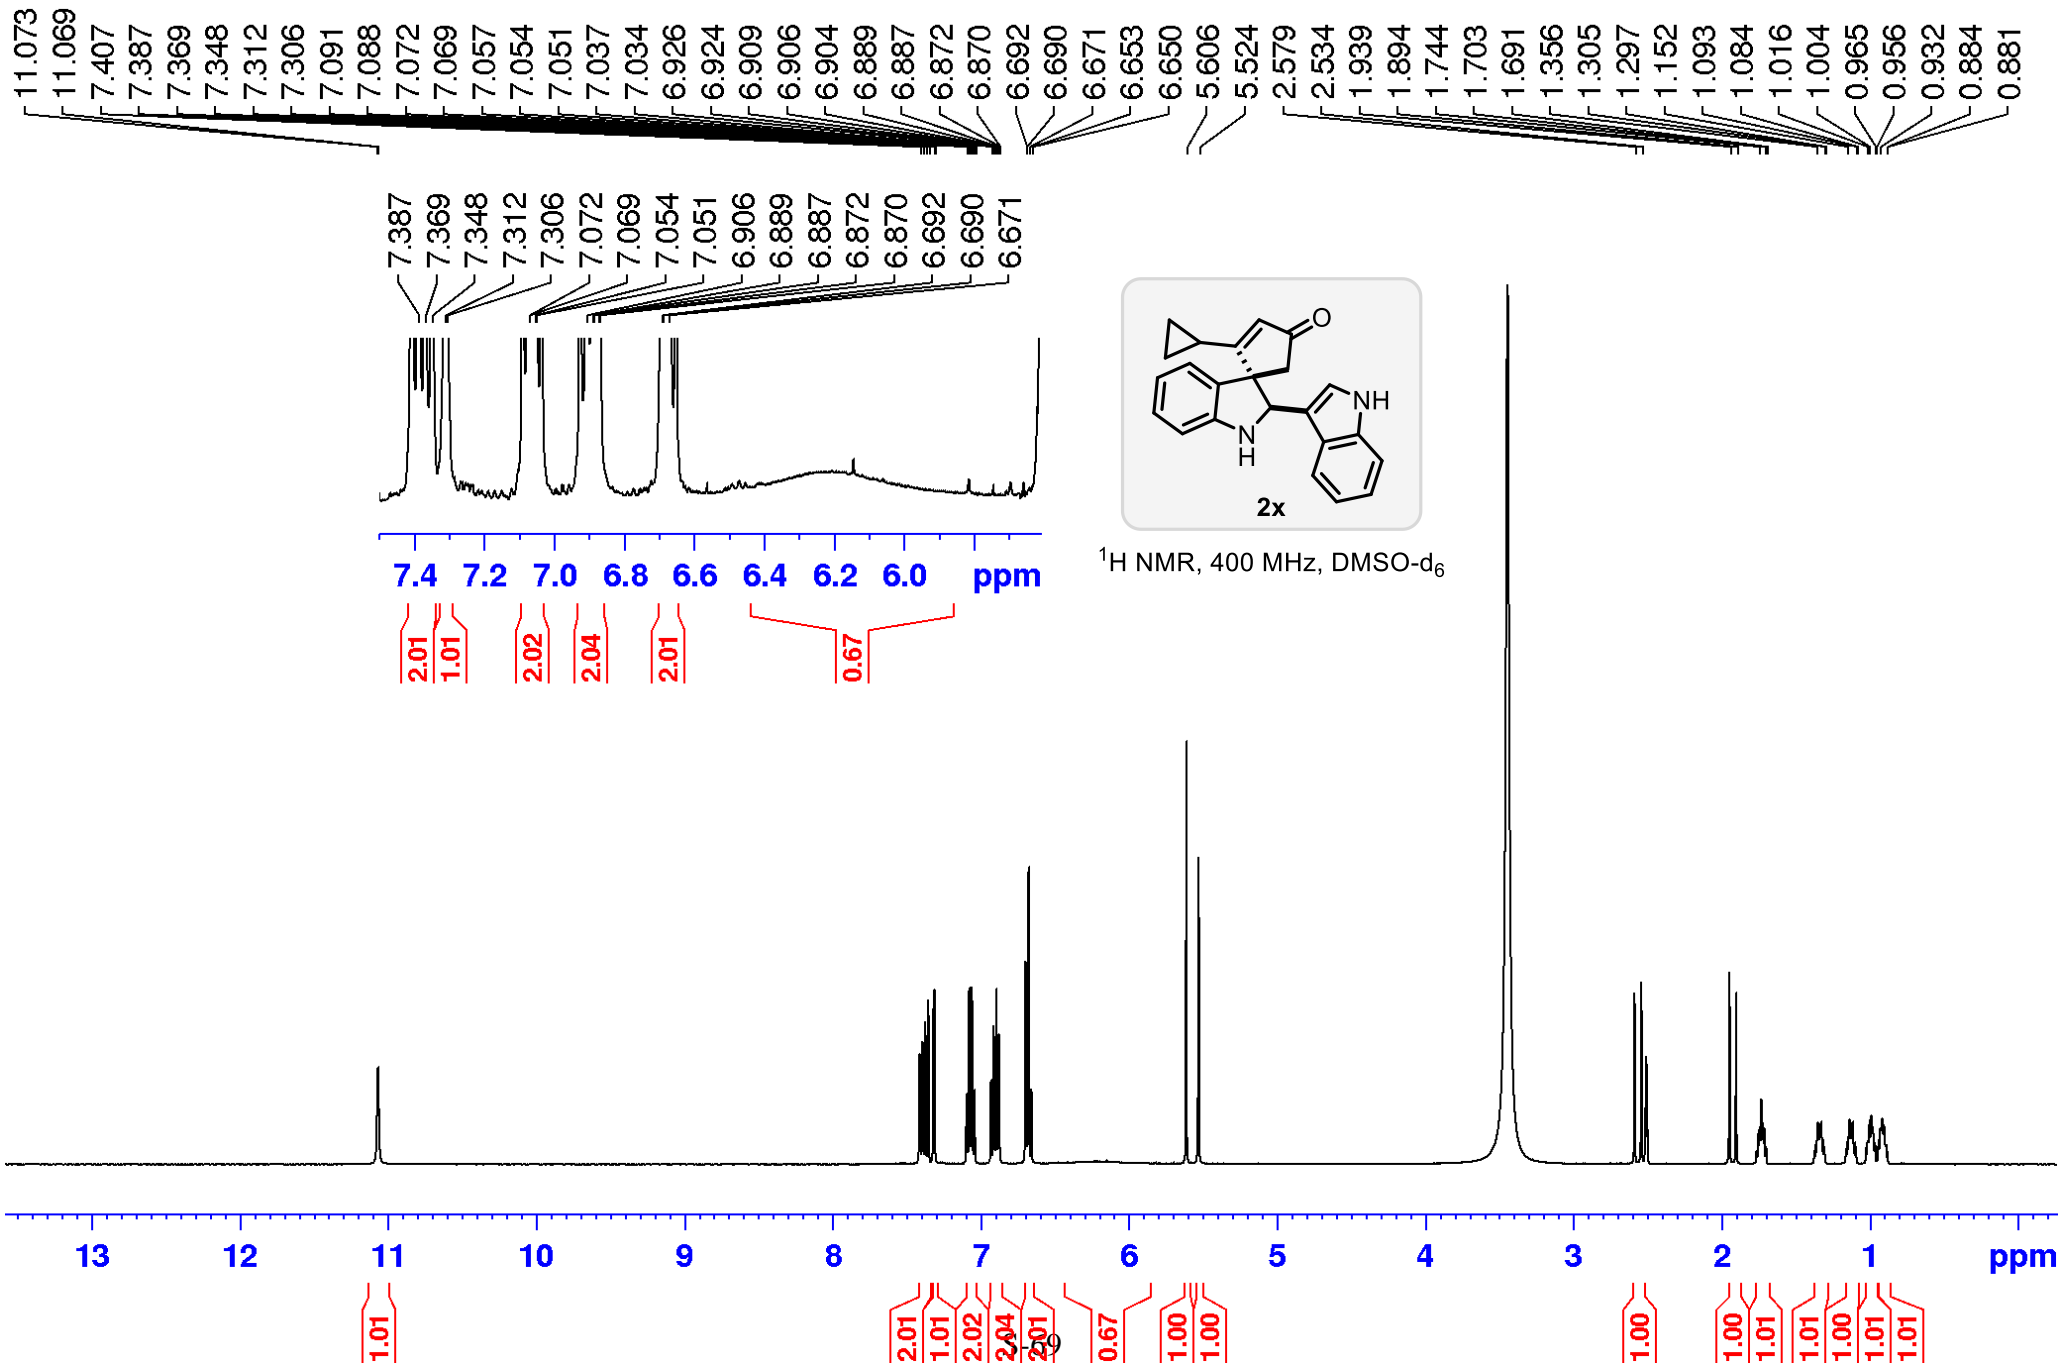

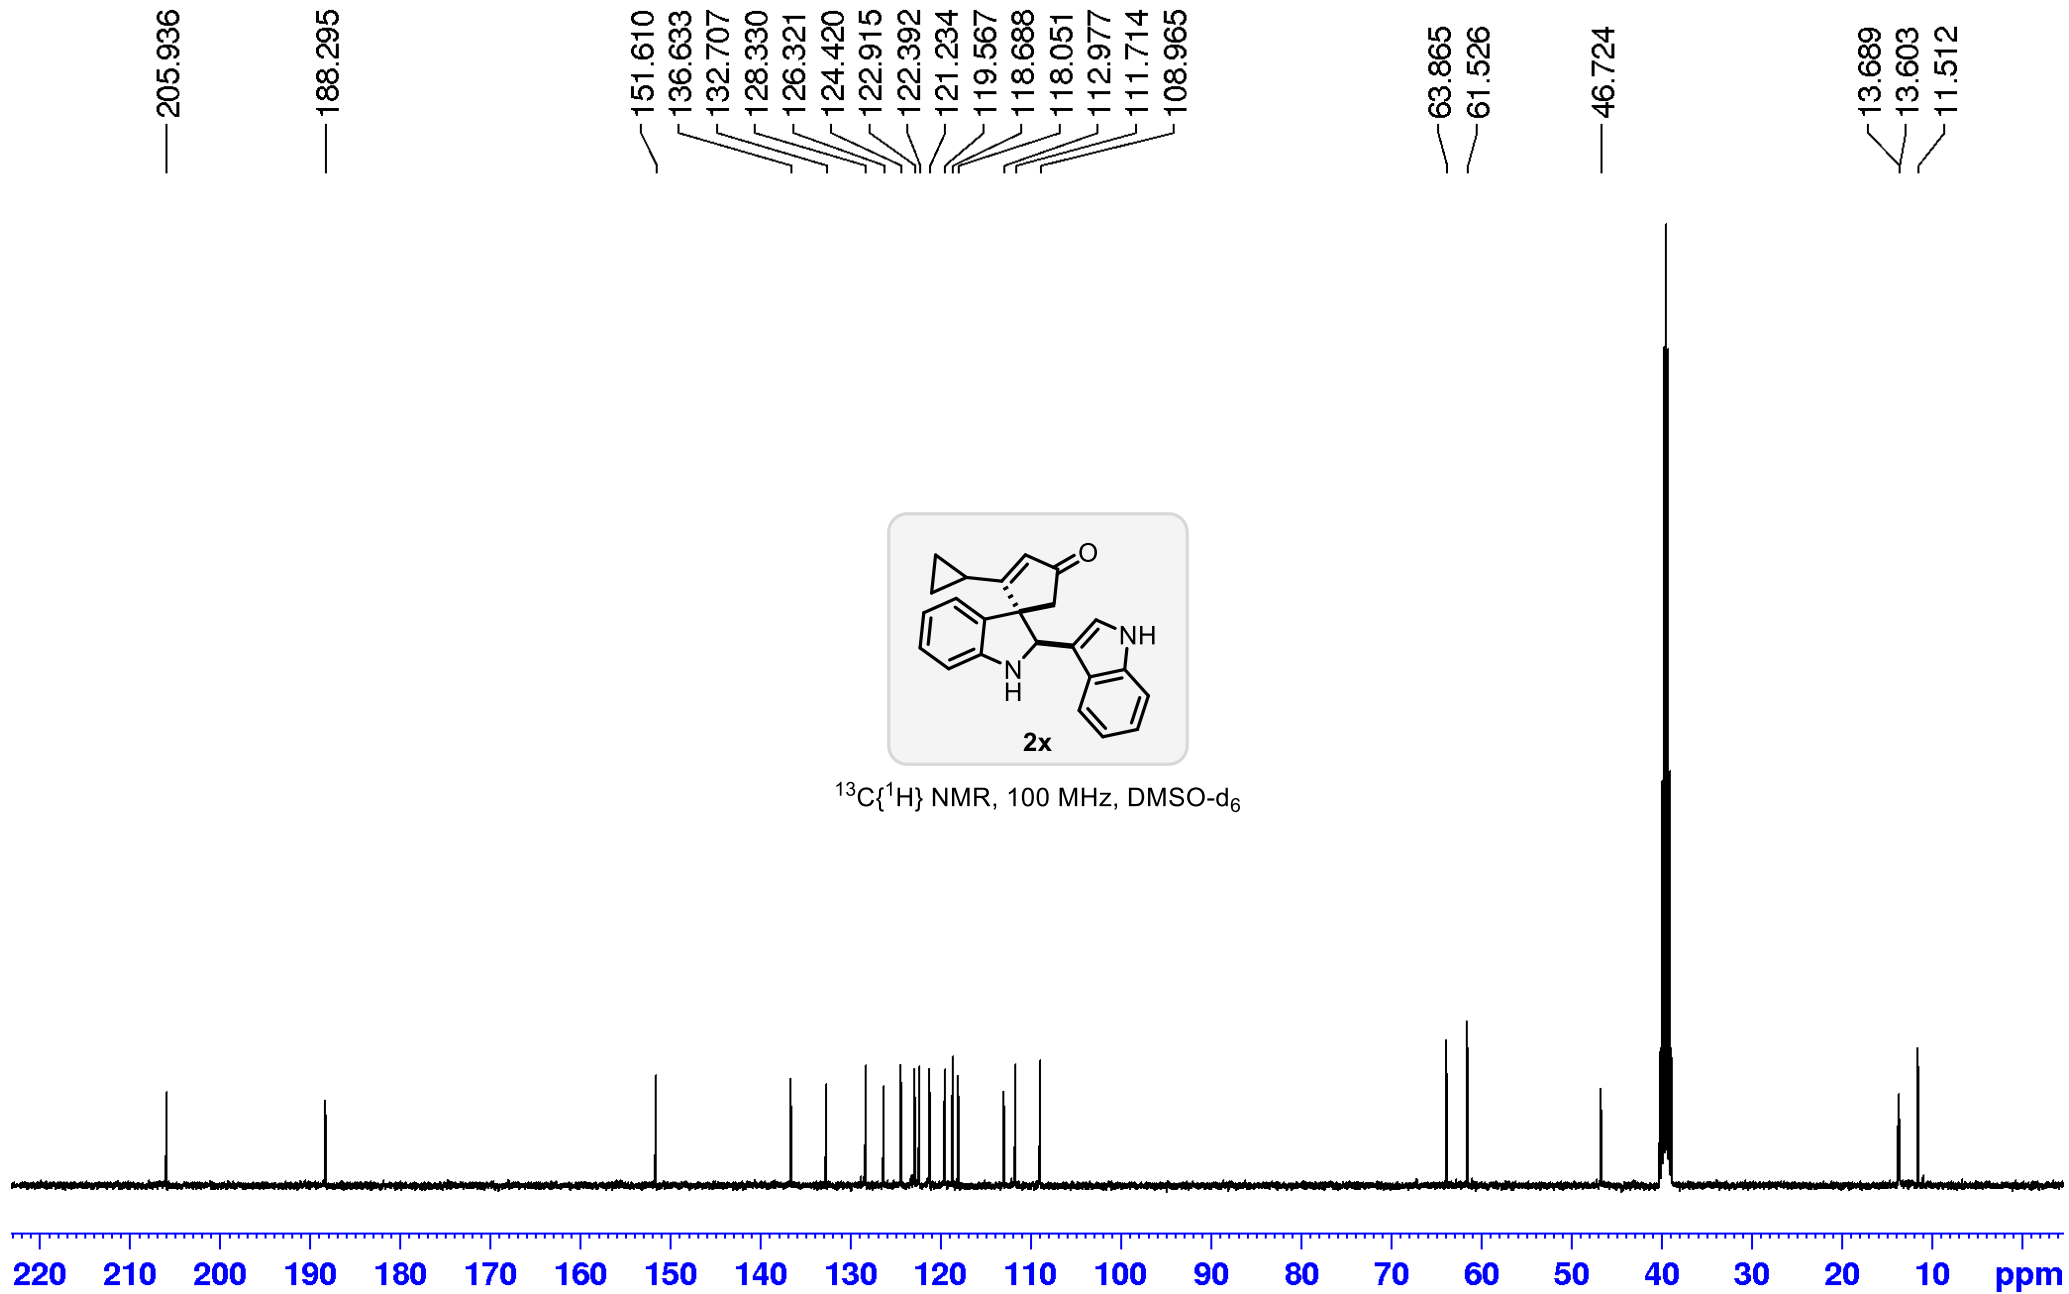

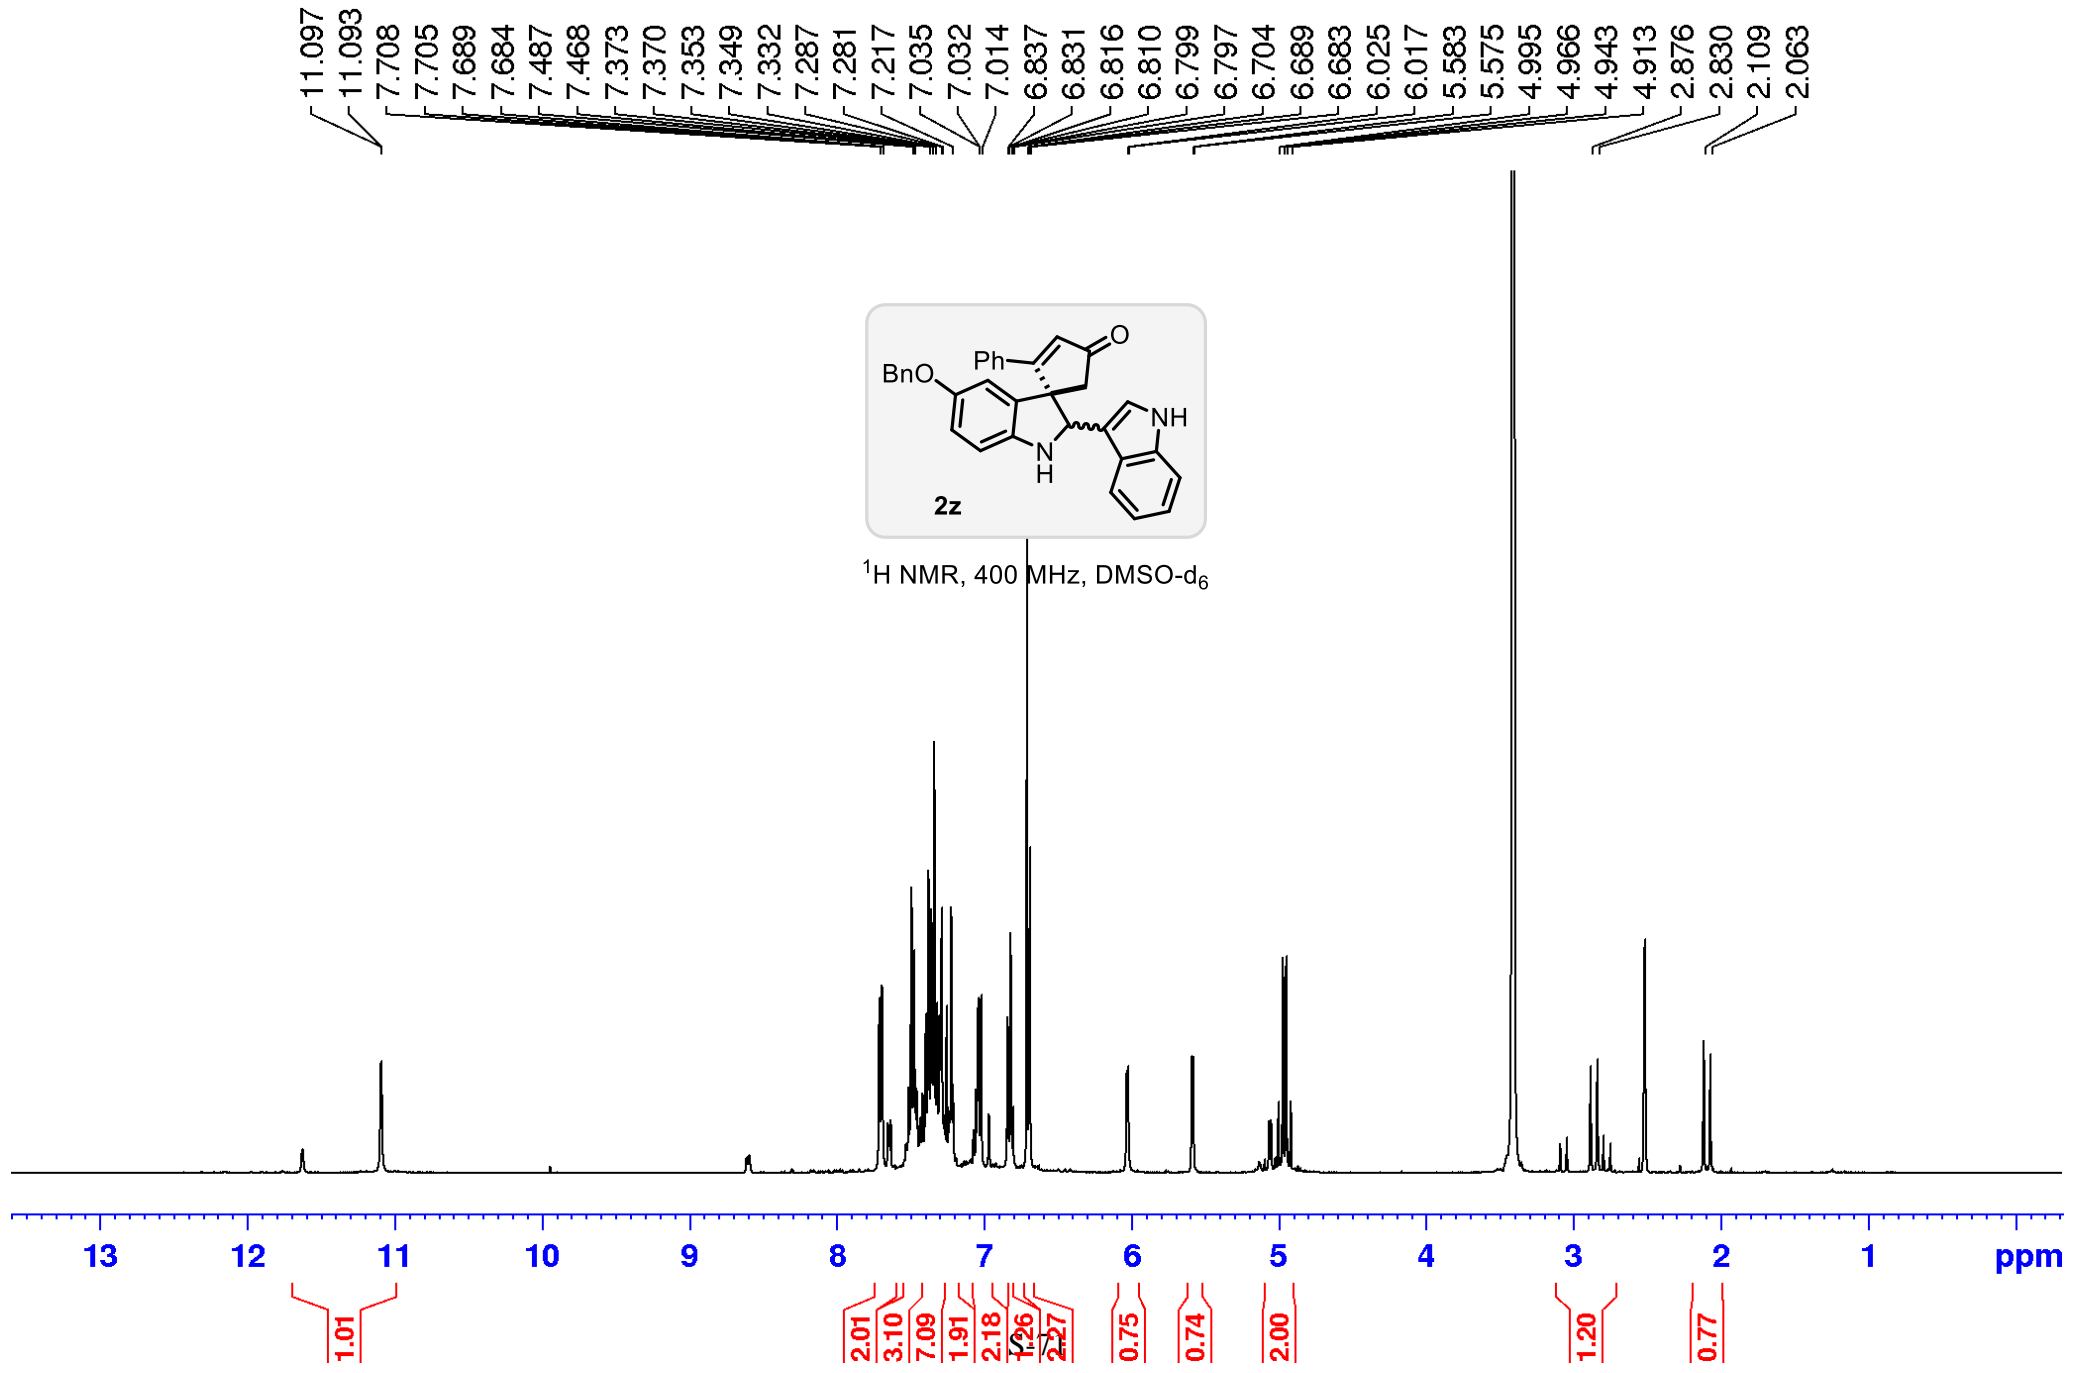

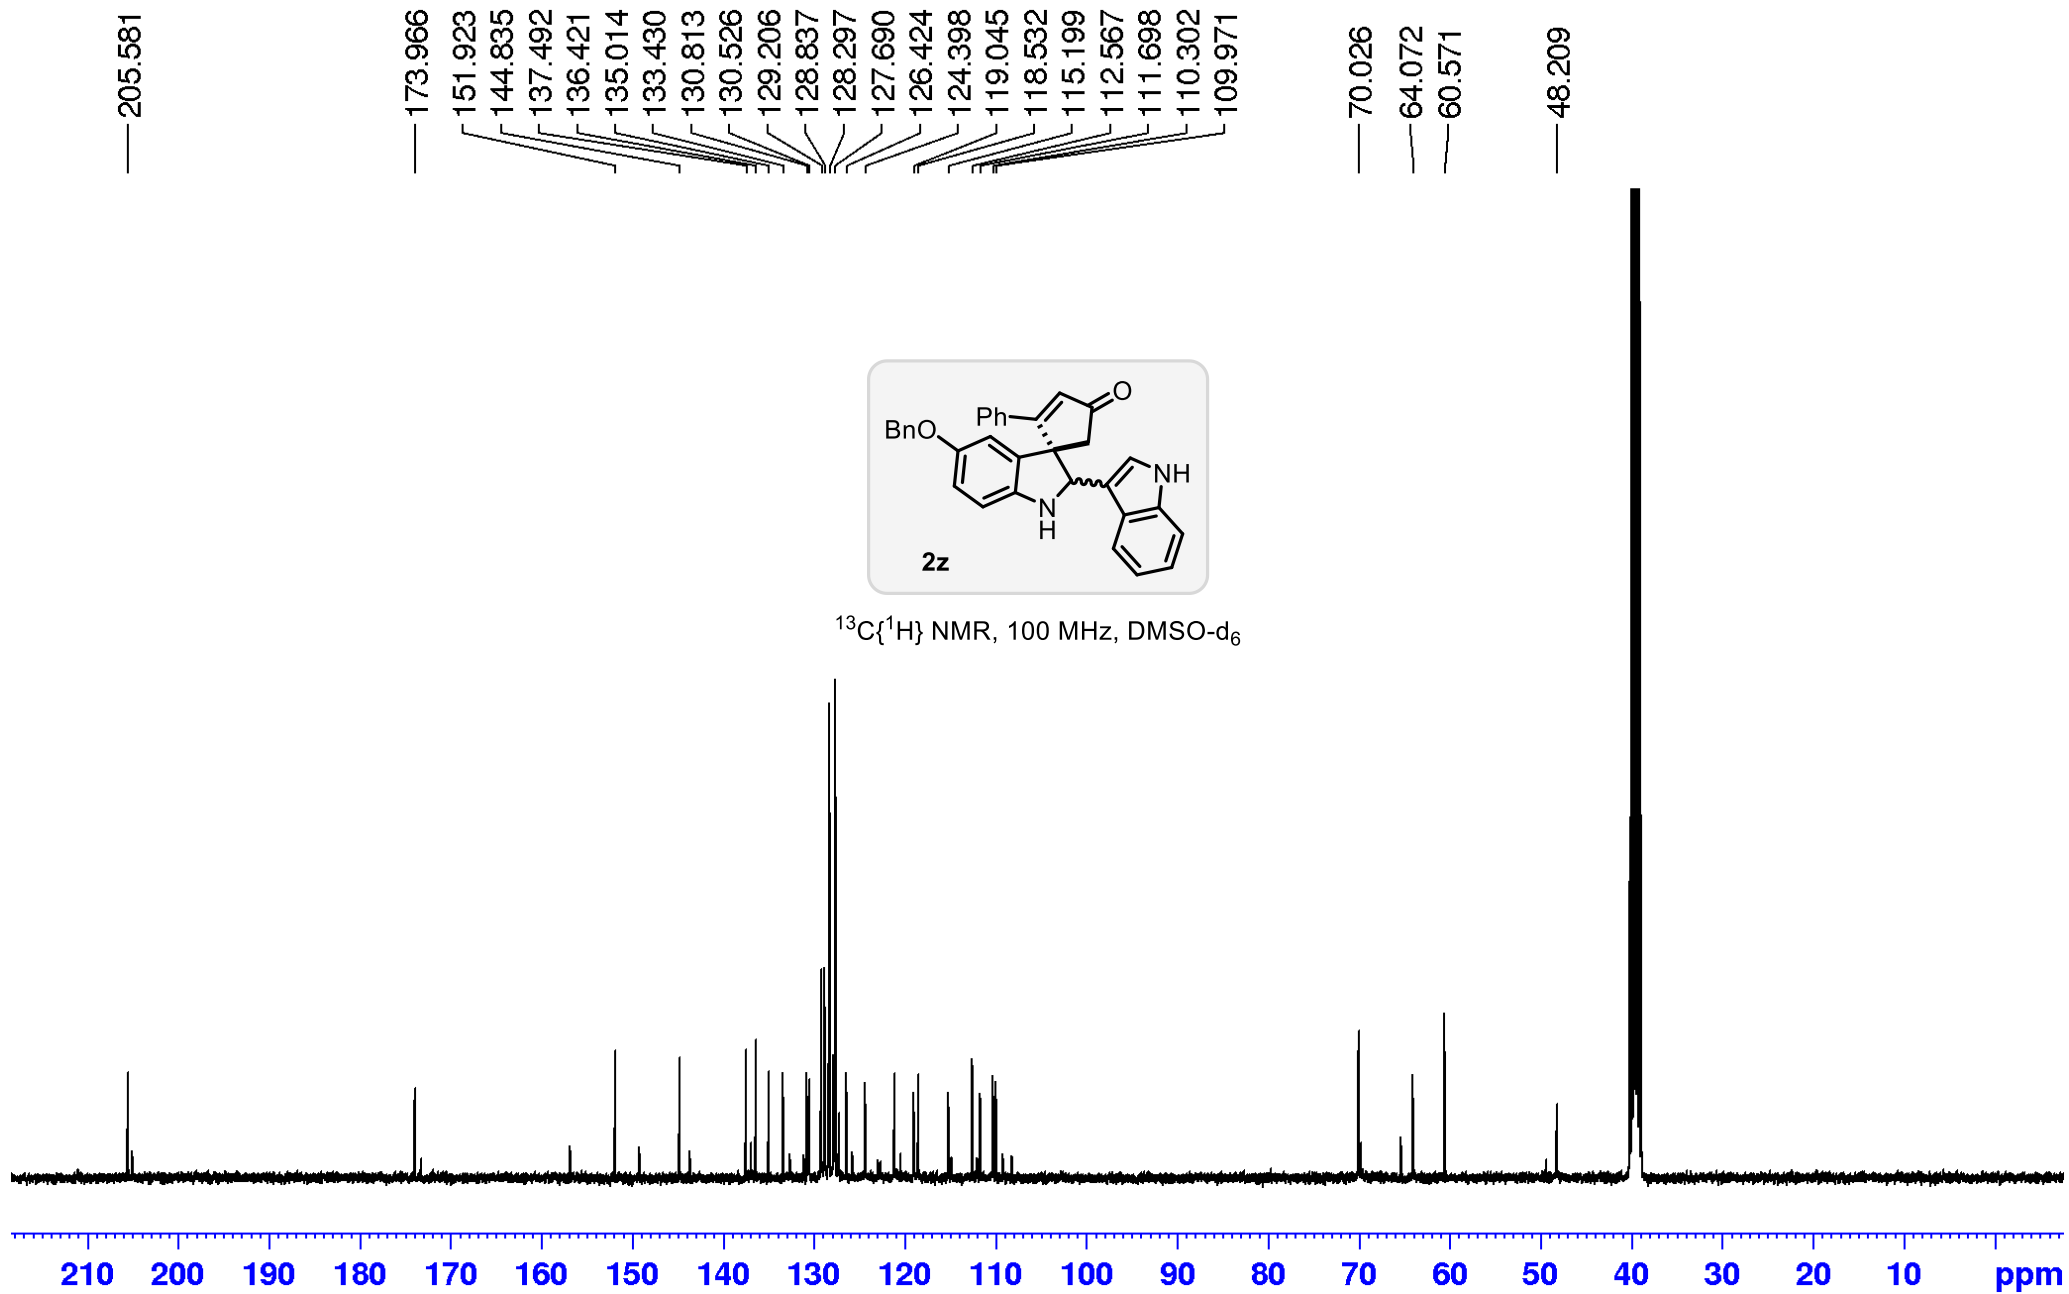



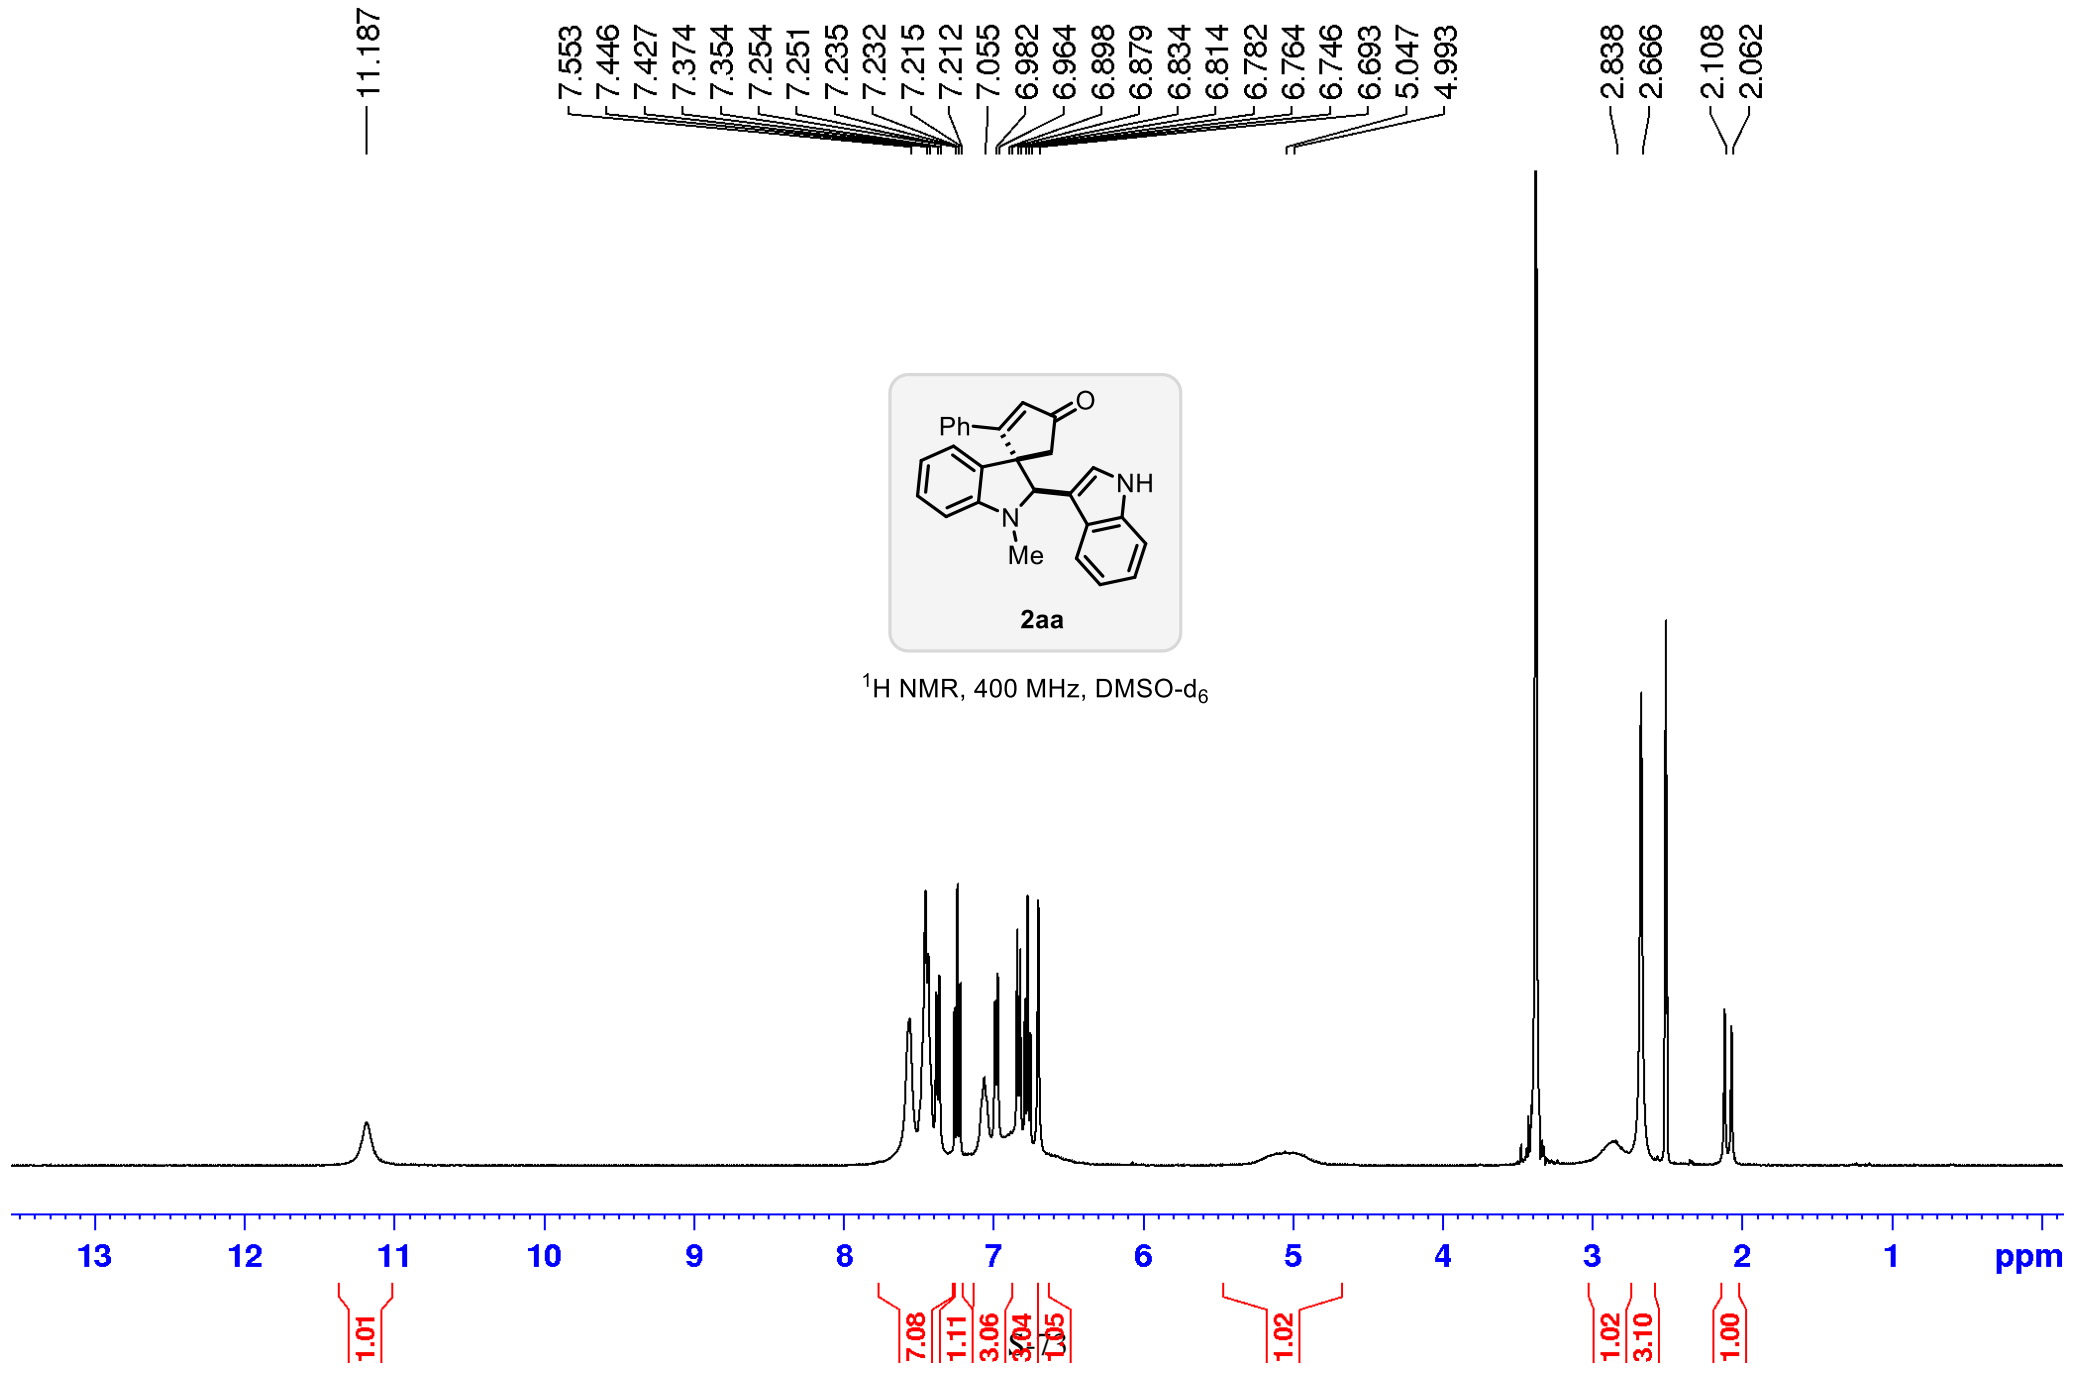

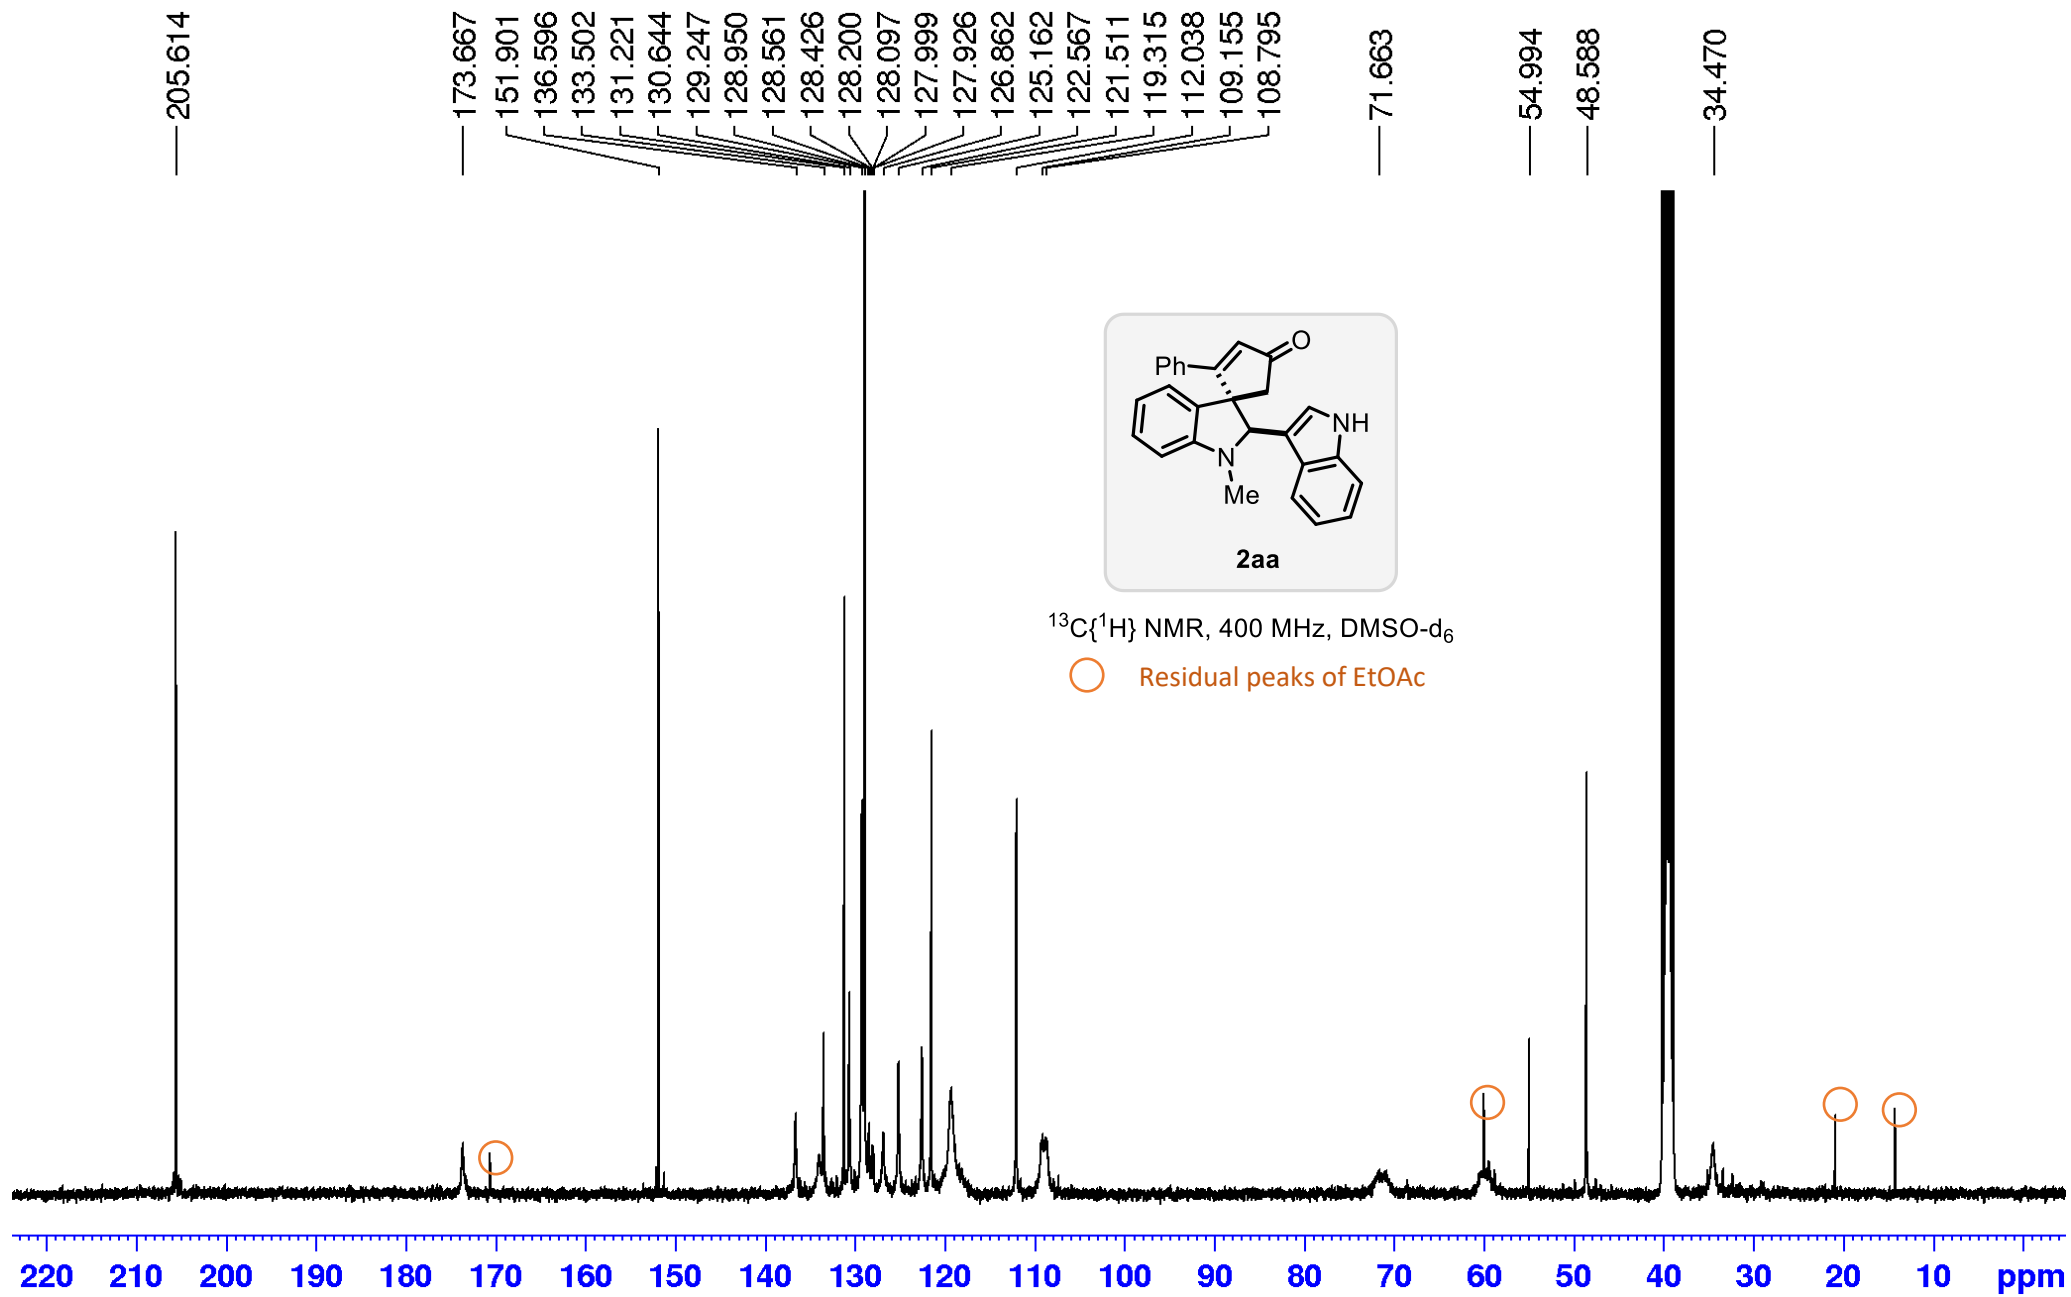

11.050  
11.045  
7.414  
7.409  
7.400  
7.397  
7.388  
7.344  
7.324  
7.269  
7.264  
7.256  
7.245  
7.159  
7.153  
7.147  
7.140  
7.137  
7.121  
7.118  
7.088  
7.069  
7.041  
7.039  
7.021  
7.003  
7.001  
6.852  
6.850  
6.832  
6.815  
6.812  
6.743  
6.724  
6.719  
6.700  
6.698  
6.682  
6.679  
6.298  
6.290  
6.199  
5.588  
5.581  
2.417  
2.062  
2.052  
2.014  
1.984  
1.973  
1.827  
1.804  
1.793

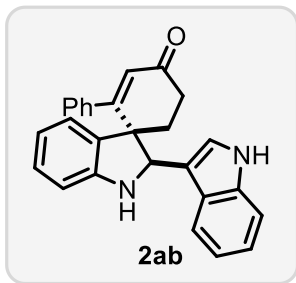

$^1\text{H}$  NMR, 400 MHz, DMSO- $\text{d}_6$

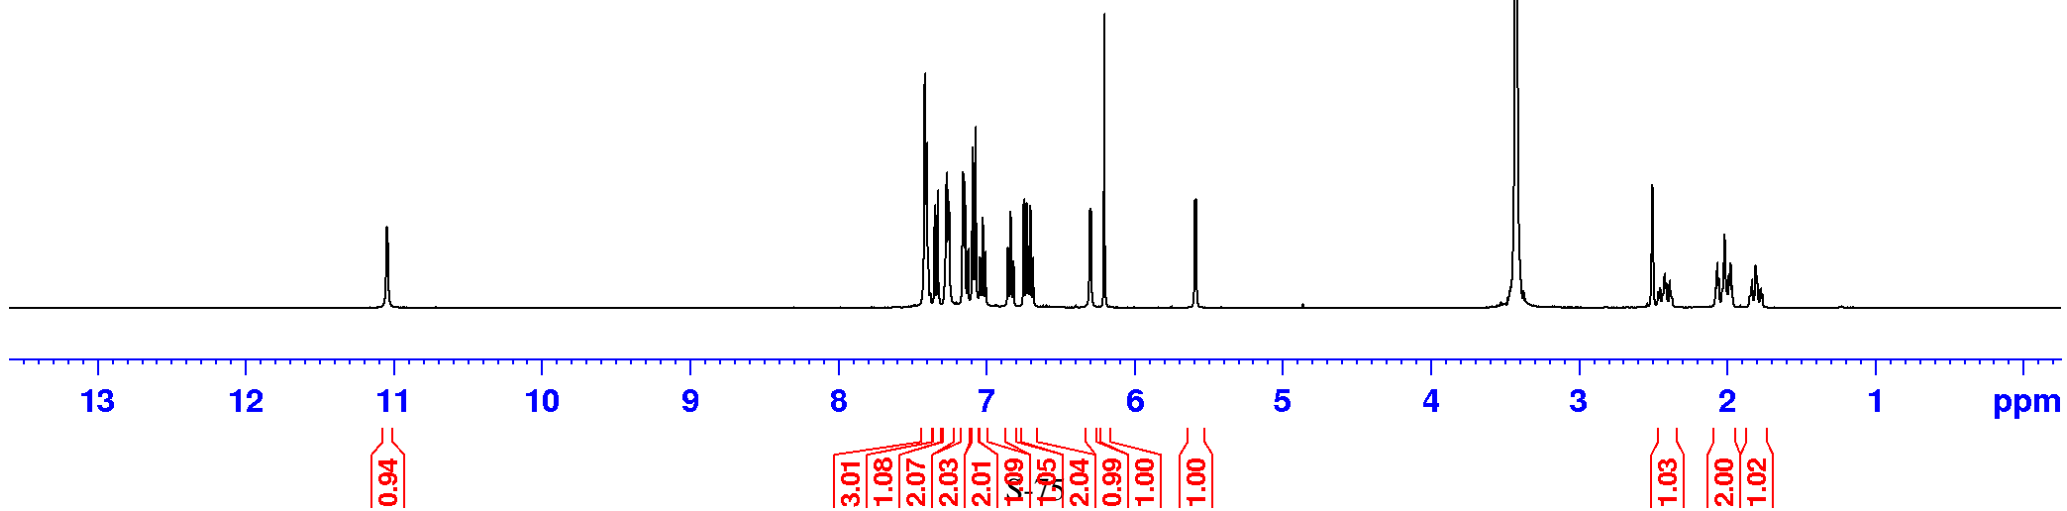

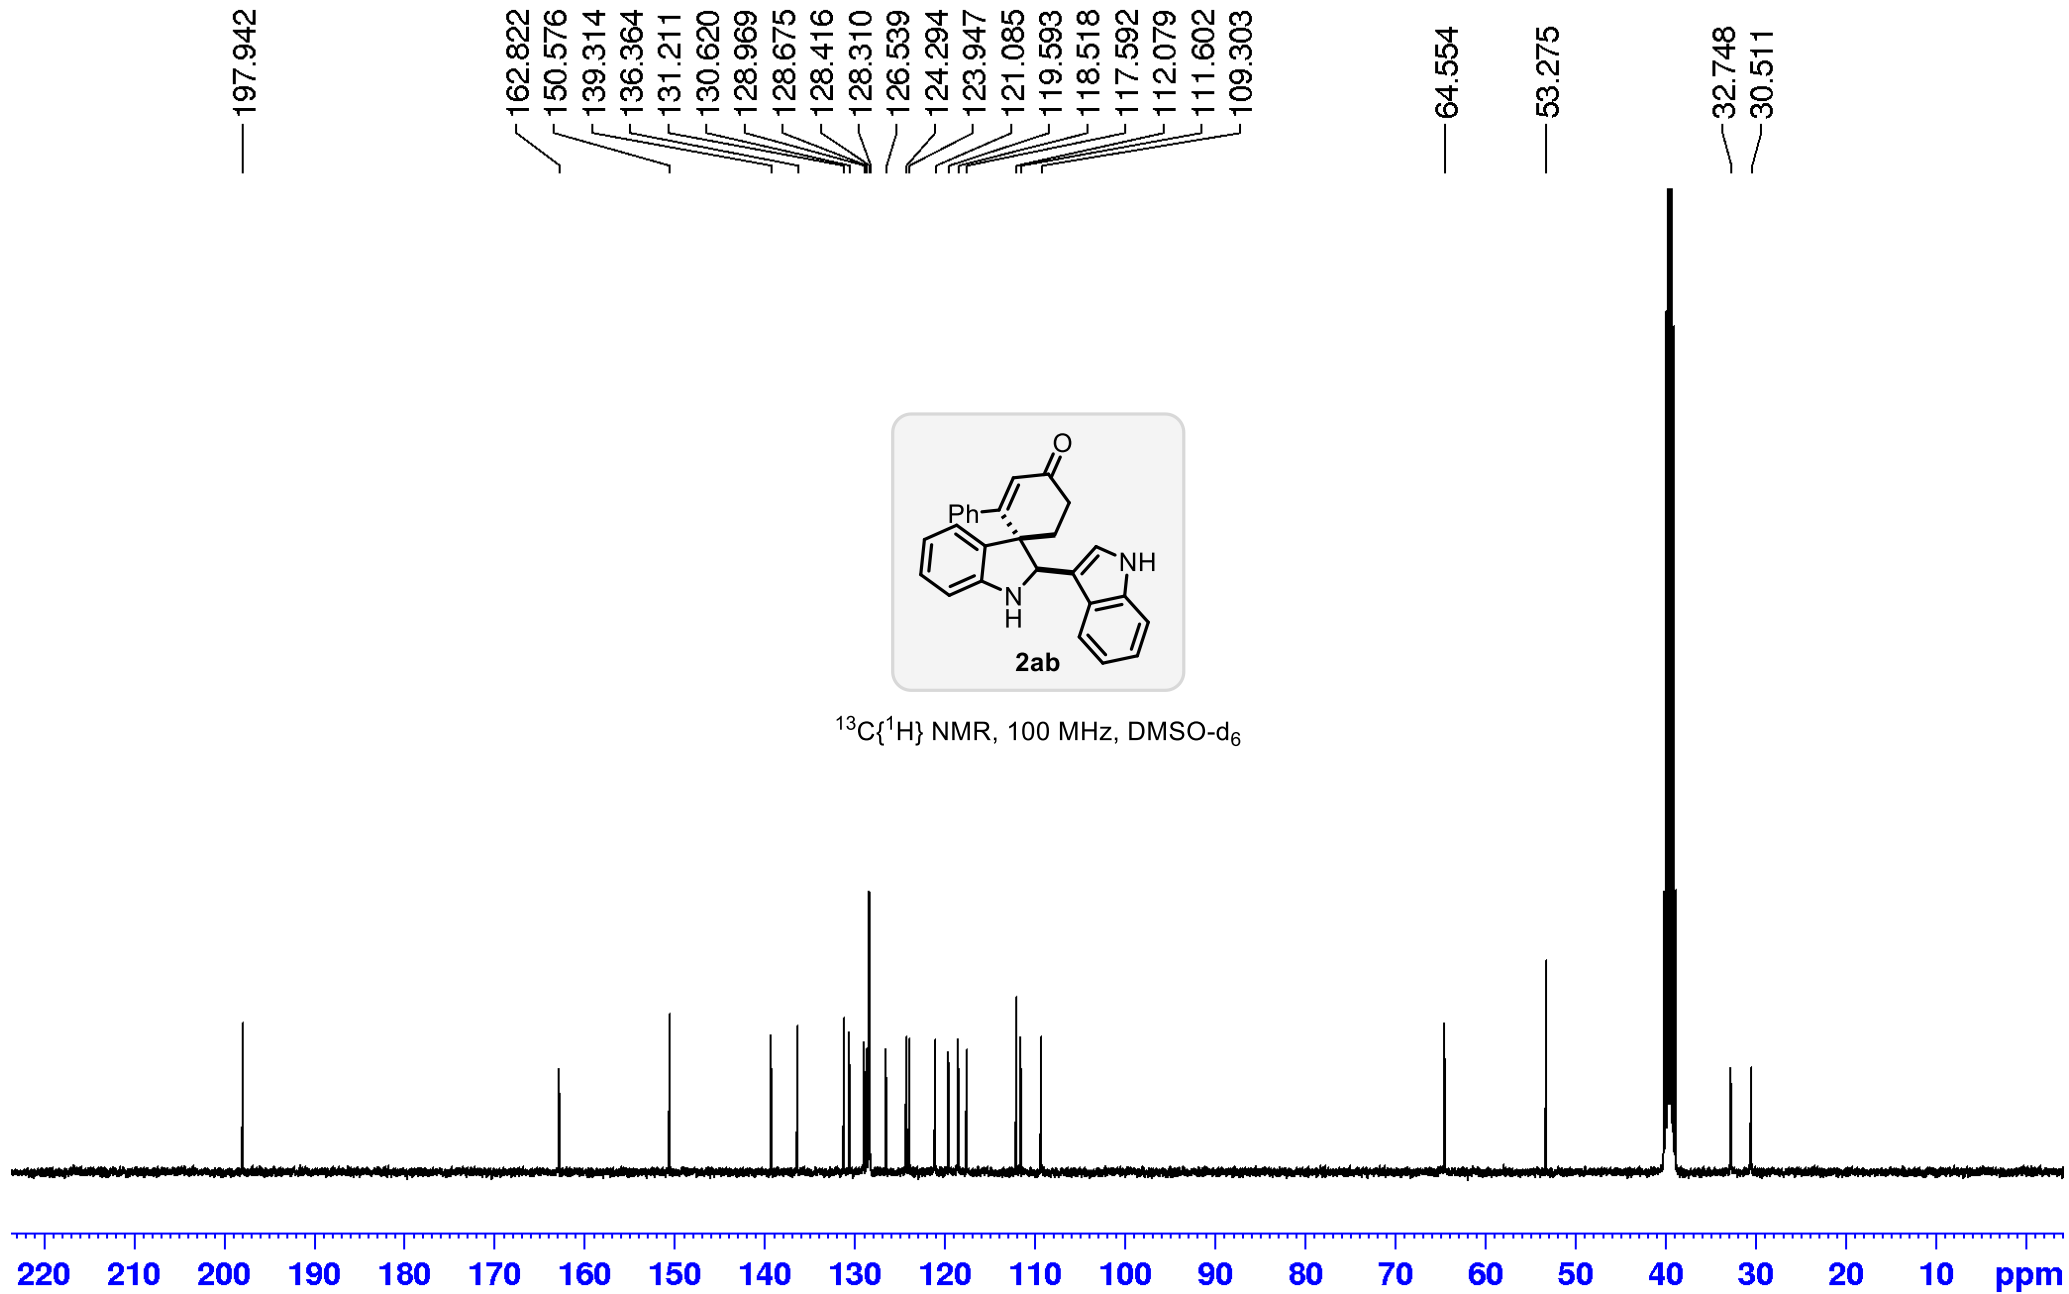

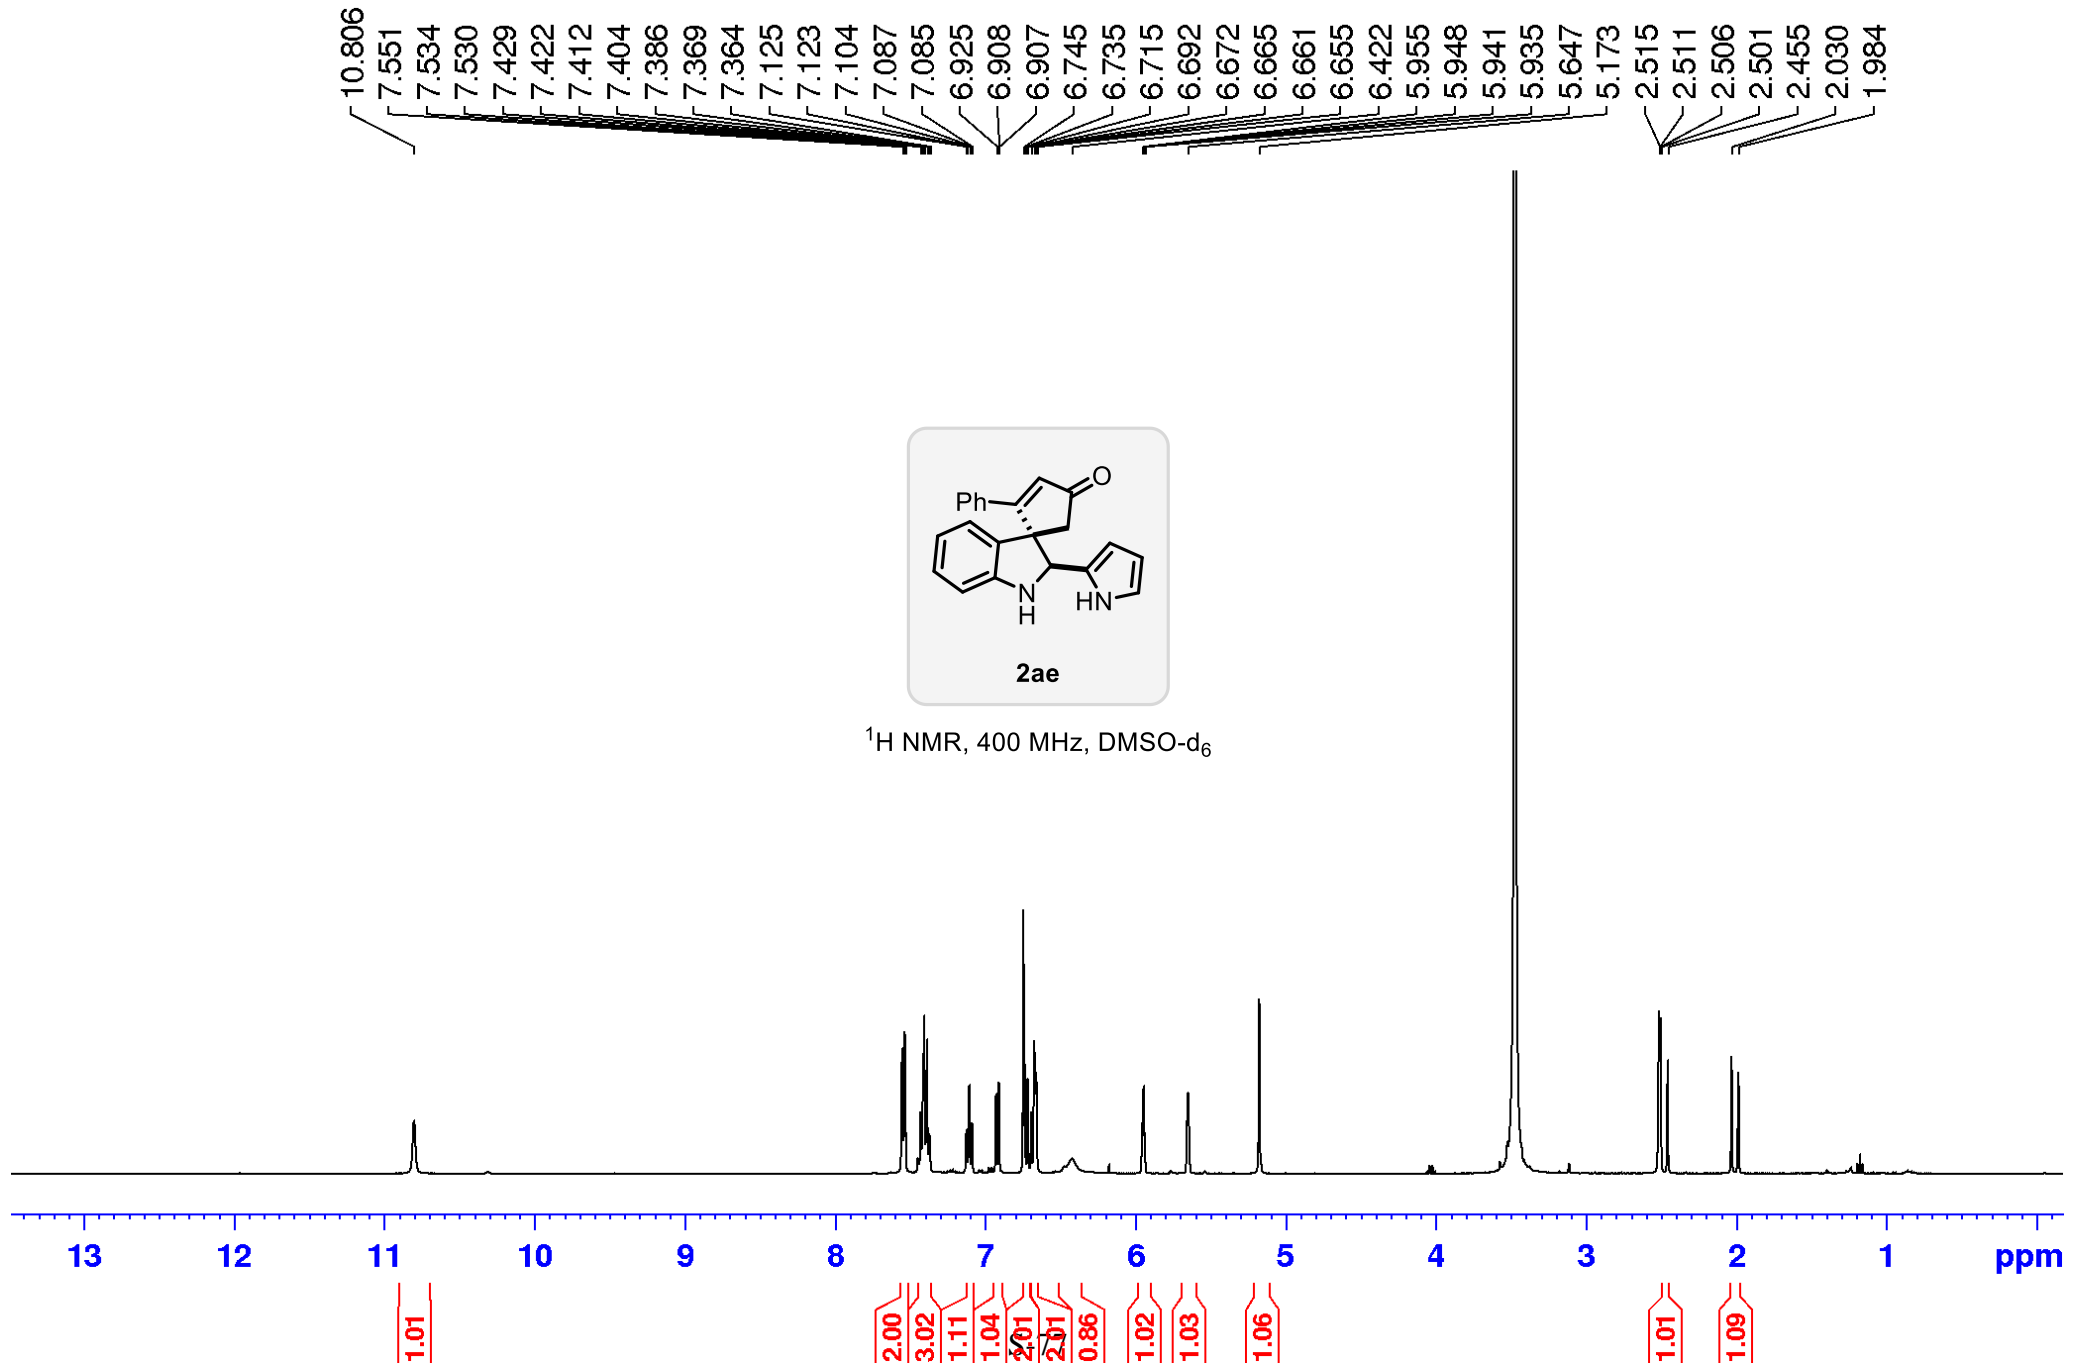

— 205.518

— 173.736

150.436  
133.477  
133.098  
130.875  
130.394  
129.008  
128.820  
128.533  
128.502  
123.030  
118.785  
117.731  
109.601  
107.794  
105.916

64.035  
60.976

— 48.485

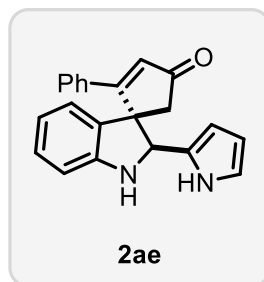

$^{13}\text{C}\{^1\text{H}\}$  NMR, 100 MHz, DMSO- $d_6$

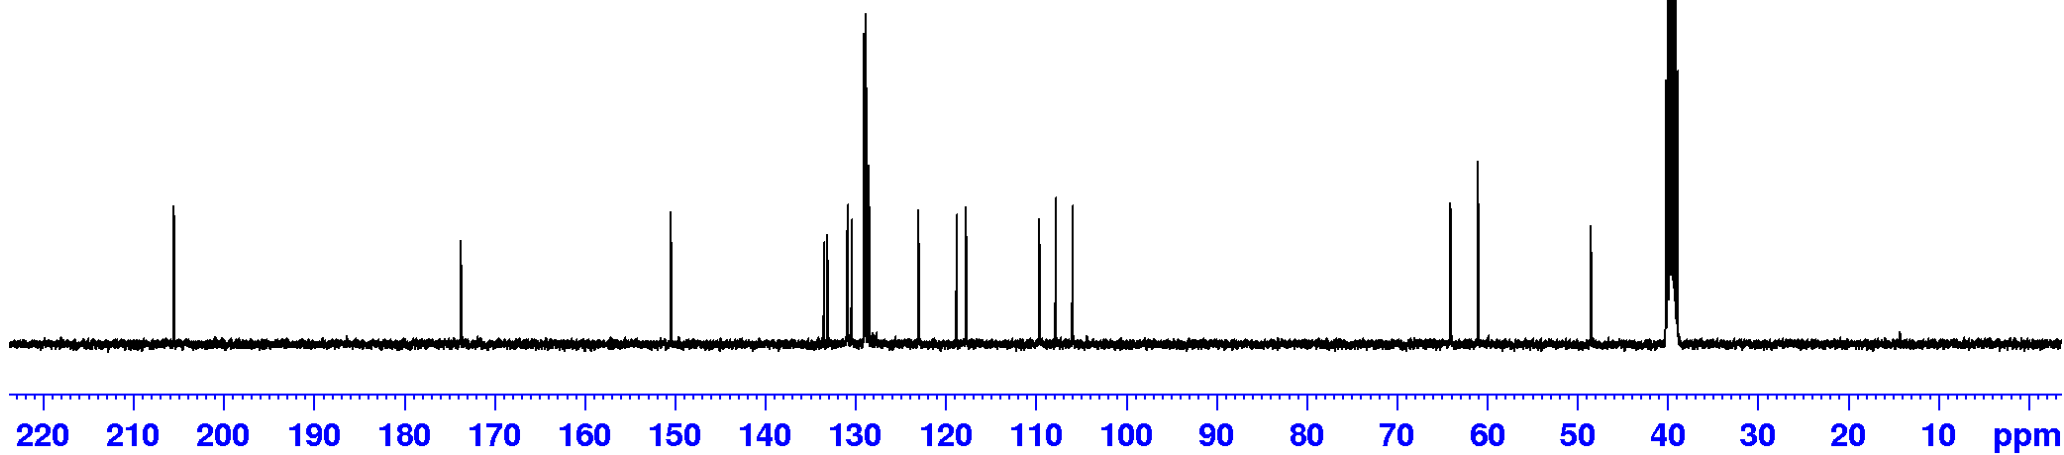



— 205.277

— 173.593

150.121  
138.982  
132.992  
132.278  
131.809  
130.056  
129.426  
129.022  
128.579  
128.478  
128.184  
127.505  
125.987  
123.884  
122.659  
118.254  
110.164  
108.814  
108.590

61.462  
60.122

— 49.299

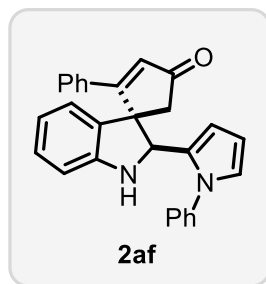

$^{13}\text{C}\{^1\text{H}\}$  NMR, 100 MHz, DMSO- $d_6$

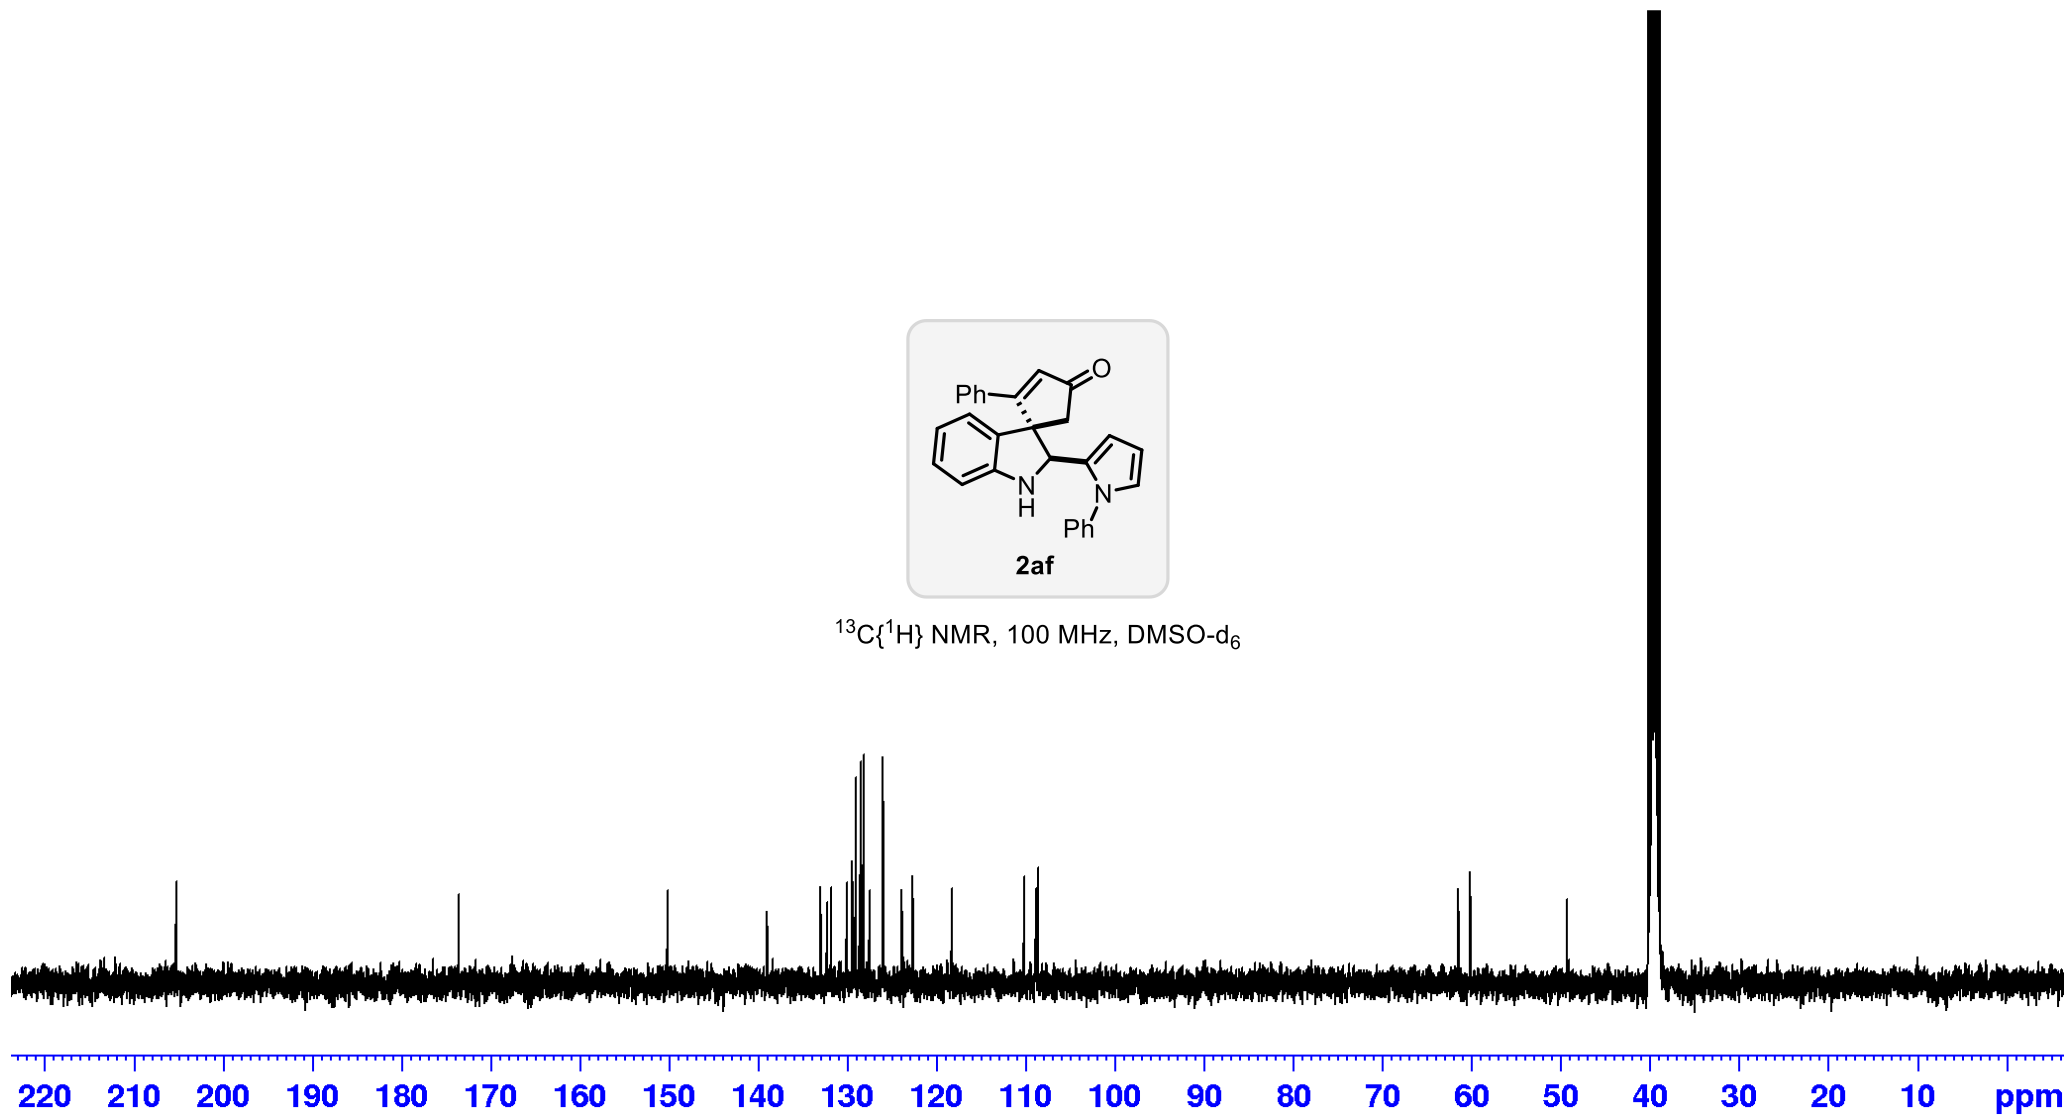



7.343  
7.323  
7.312  
7.295  
7.276  
7.257  
7.240  
7.216  
7.185  
7.121  
7.102  
7.084  
6.962  
6.944  
6.779  
6.760  
6.741  
6.726  
6.707  
6.519  
6.315  
6.306  
5.931  
5.922  
5.252  
— 3.746  
2.940  
2.893  
2.192  
2.145

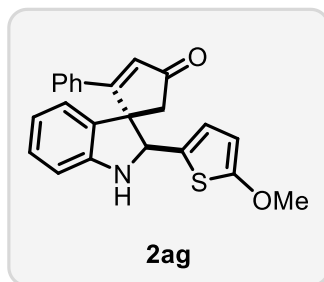

<sup>1</sup>H NMR, 400 MHz, CDCl<sub>3</sub>

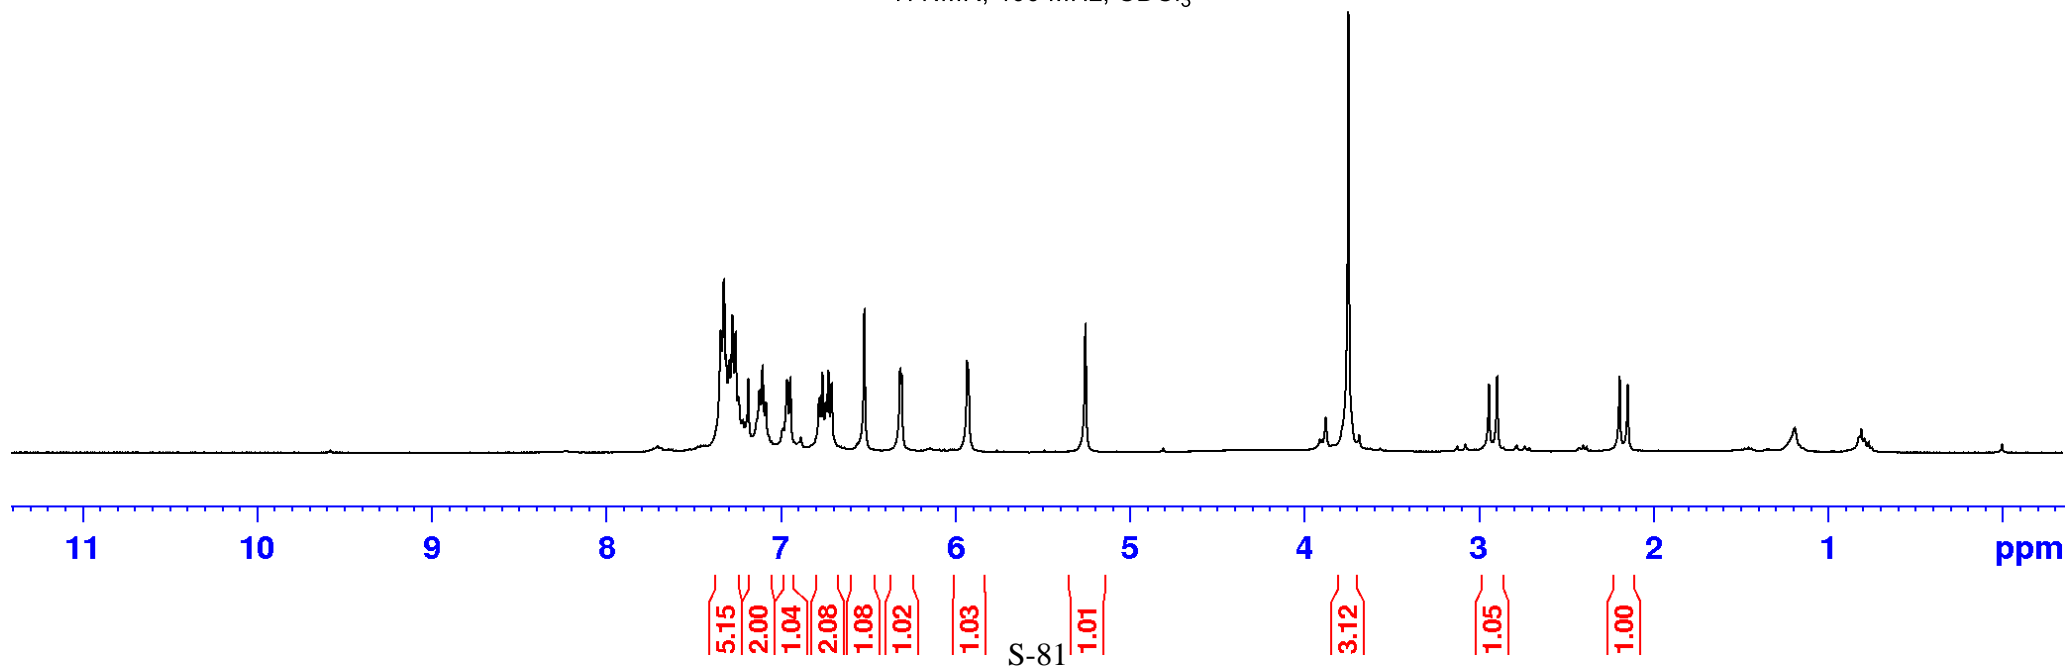

—206.722

—174.413

—165.755

148.907

133.896

133.362

132.298

130.431

129.000

128.956

128.864

127.398

123.315

122.380

120.767

110.373

103.542

65.797

61.639

60.160

—47.951

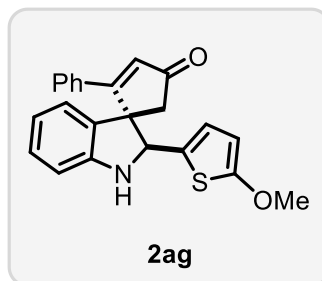

$^{13}\text{C}\{^1\text{H}\}$  NMR, 100 MHz,  $\text{CDCl}_3$

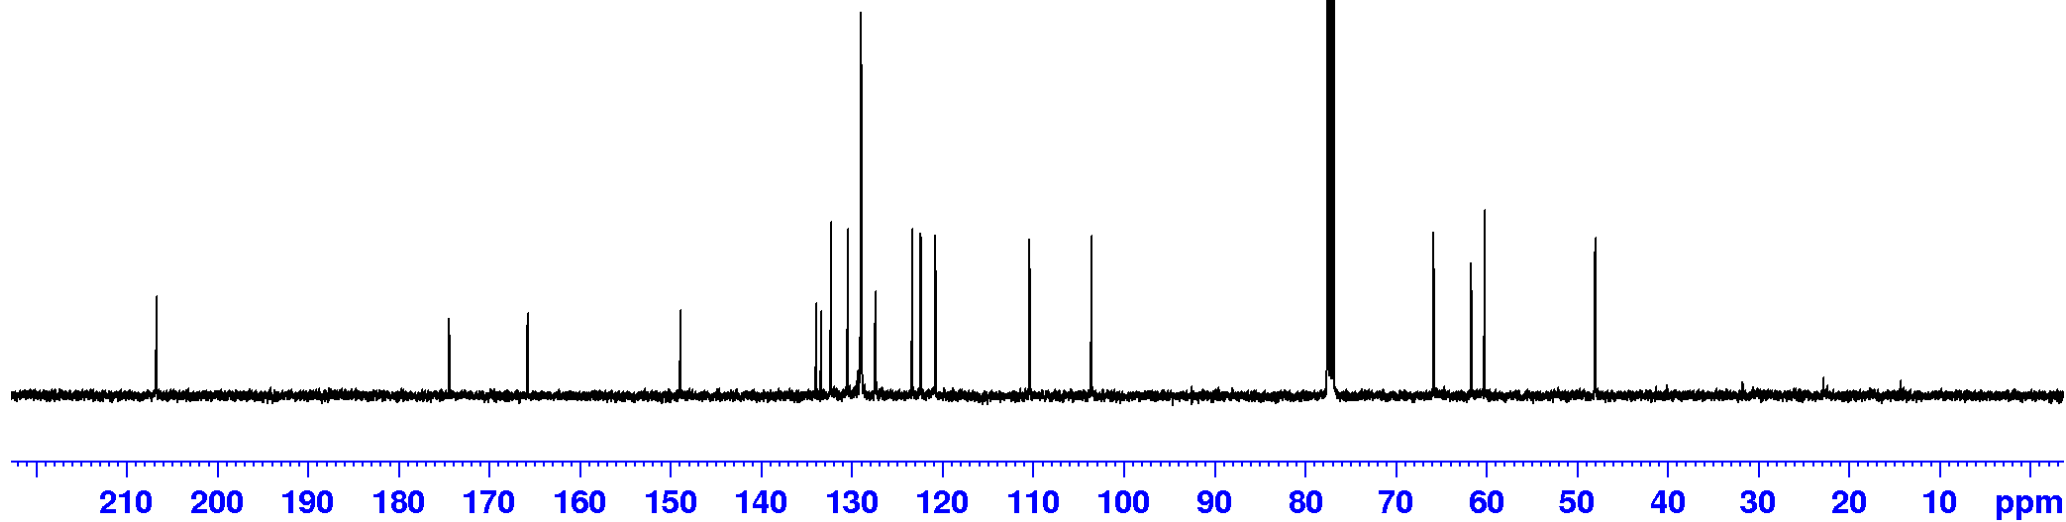

8.394  
8.371  
8.003  
7.993  
7.740  
7.716  
7.696  
7.680  
7.676  
7.650  
7.626  
7.601  
7.561  
7.546  
7.527  
7.517  
7.509  
7.494  
7.487  
7.430  
7.420  
7.231  
7.207  
7.182  
7.162  
7.160  
7.144  
7.141  
6.963  
6.945  
6.914  
6.890  
6.866  
6.823  
6.804  
6.736  
6.719  
6.717  
6.701  
6.699  
6.635  
6.530  
6.523  
5.982  
5.974  
2.569  
2.523  
2.106  
2.060

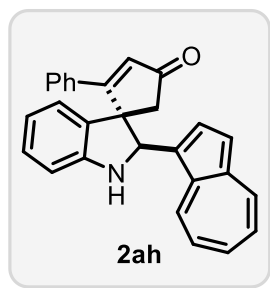

<sup>1</sup>H NMR, 400 MHz, DMSO-d<sub>6</sub>

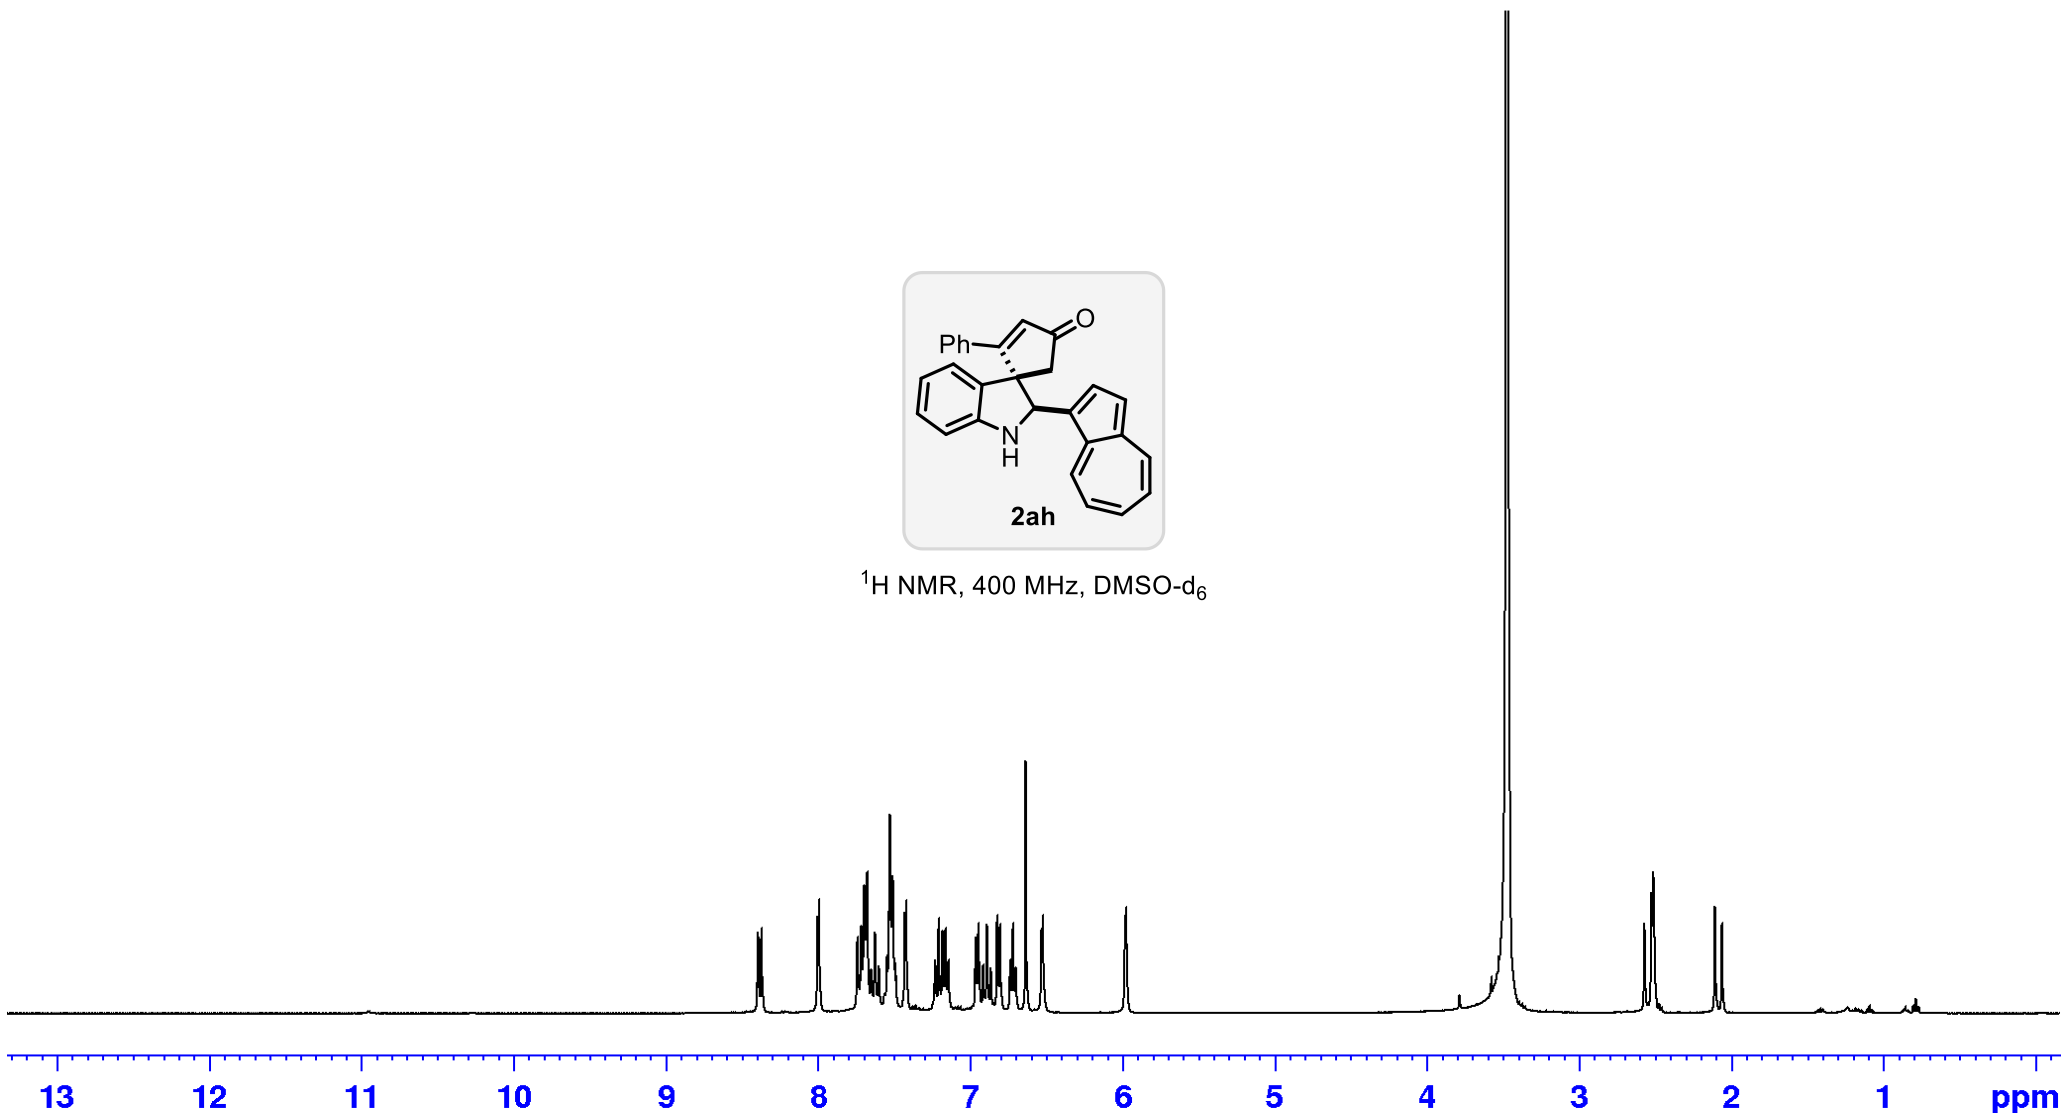

13 12 11 10 9 8 7 6 5 4 3 2 1 ppm

1.04  
1.01  
4.14  
3.06  
1.05  
2.16  
1.04  
1.04  
1.04  
3.03  
1.01  
1.01  
1.04

1.09  
1.00

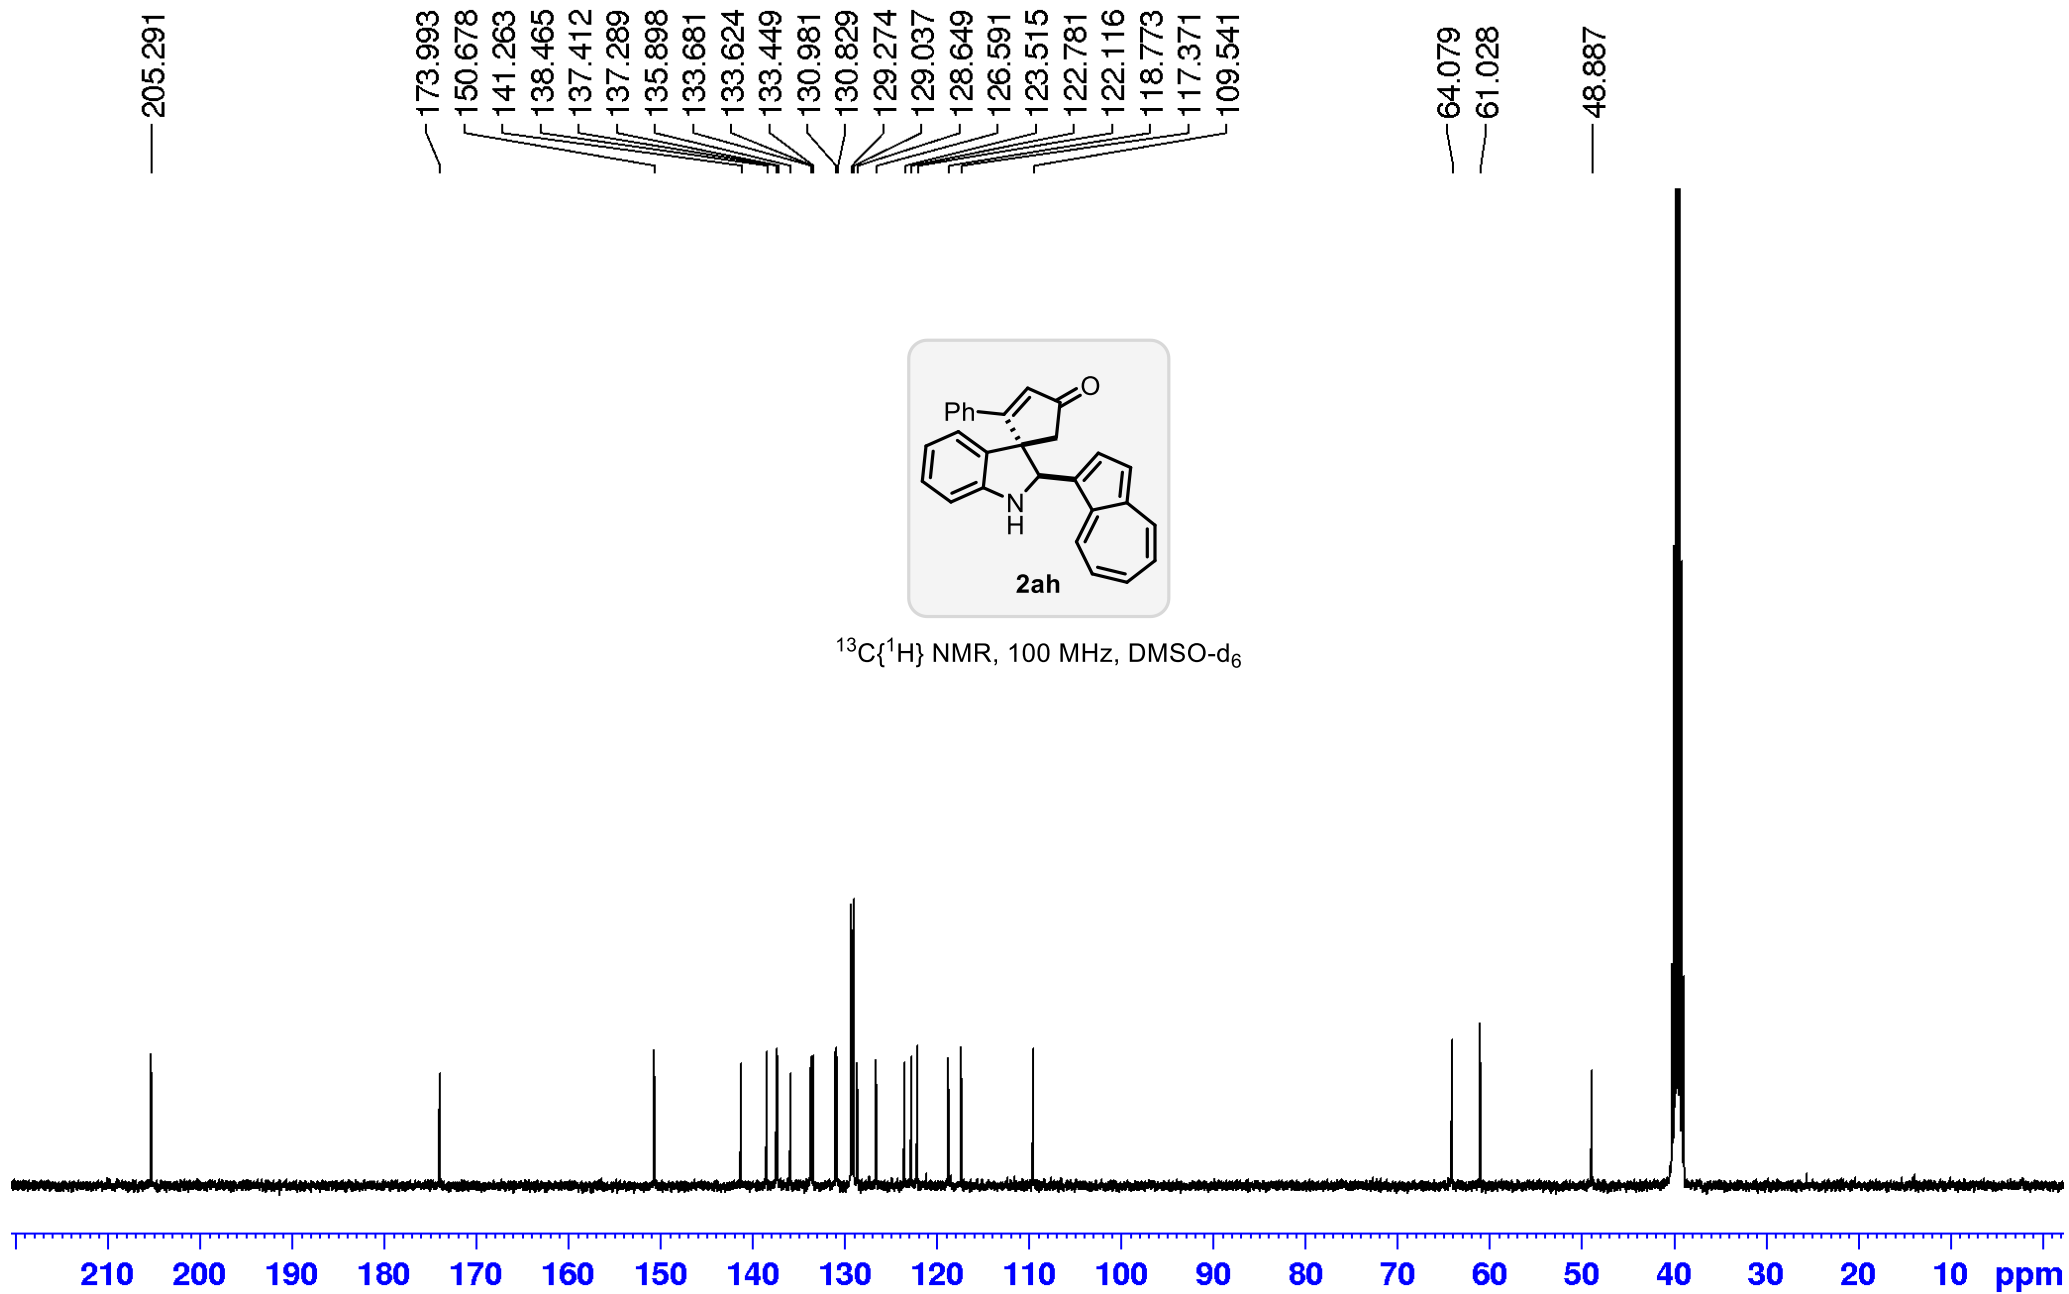

7.300  
7.296  
7.293  
7.288  
7.279  
7.275  
7.267  
7.261  
7.244  
7.241  
7.231  
7.230  
7.223  
7.214  
7.212  
7.209  
7.206  
7.202  
7.197  
7.193  
7.188  
7.090  
7.087  
7.070  
7.068  
7.059  
7.051  
7.048  
6.898  
6.880  
6.880  
6.710  
6.691  
6.671  
6.517  
3.932  
3.907  
3.530  
3.505  
2.908  
2.861  
2.778  
2.731

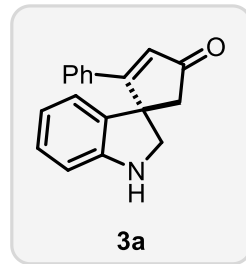

$^1\text{H NMR}$ , 400 MHz,  $\text{CDCl}_3$

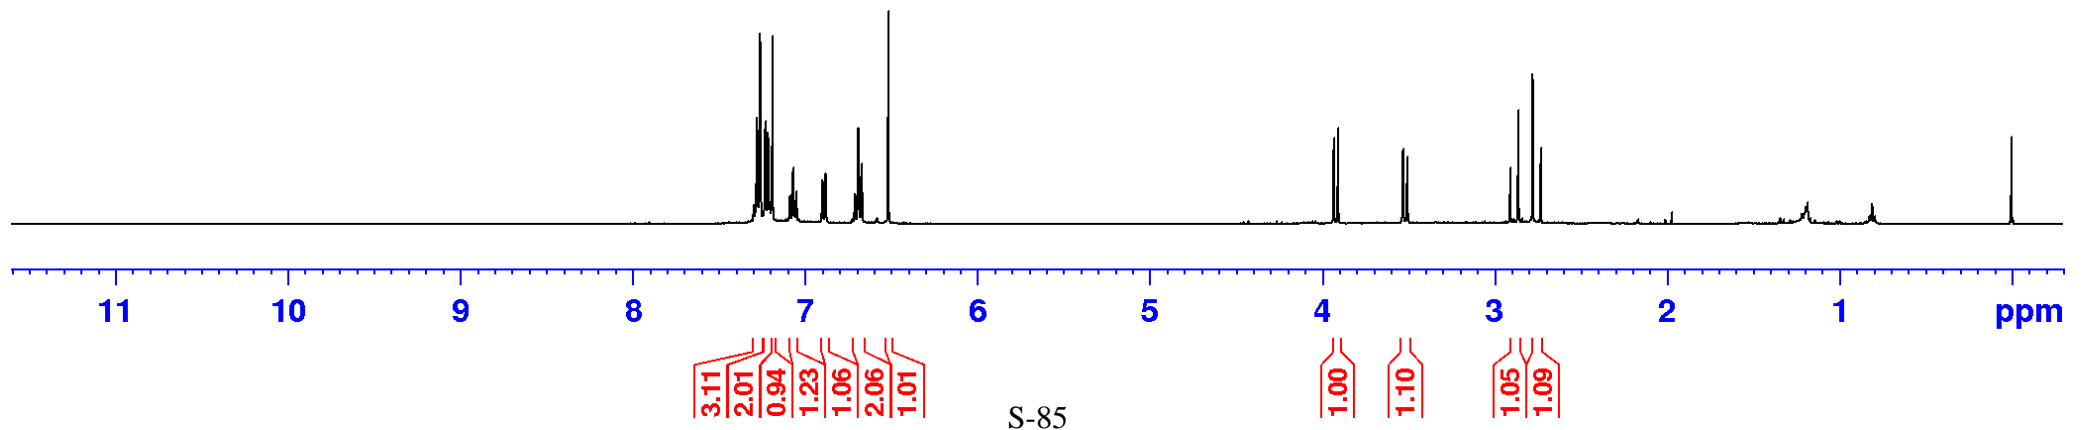

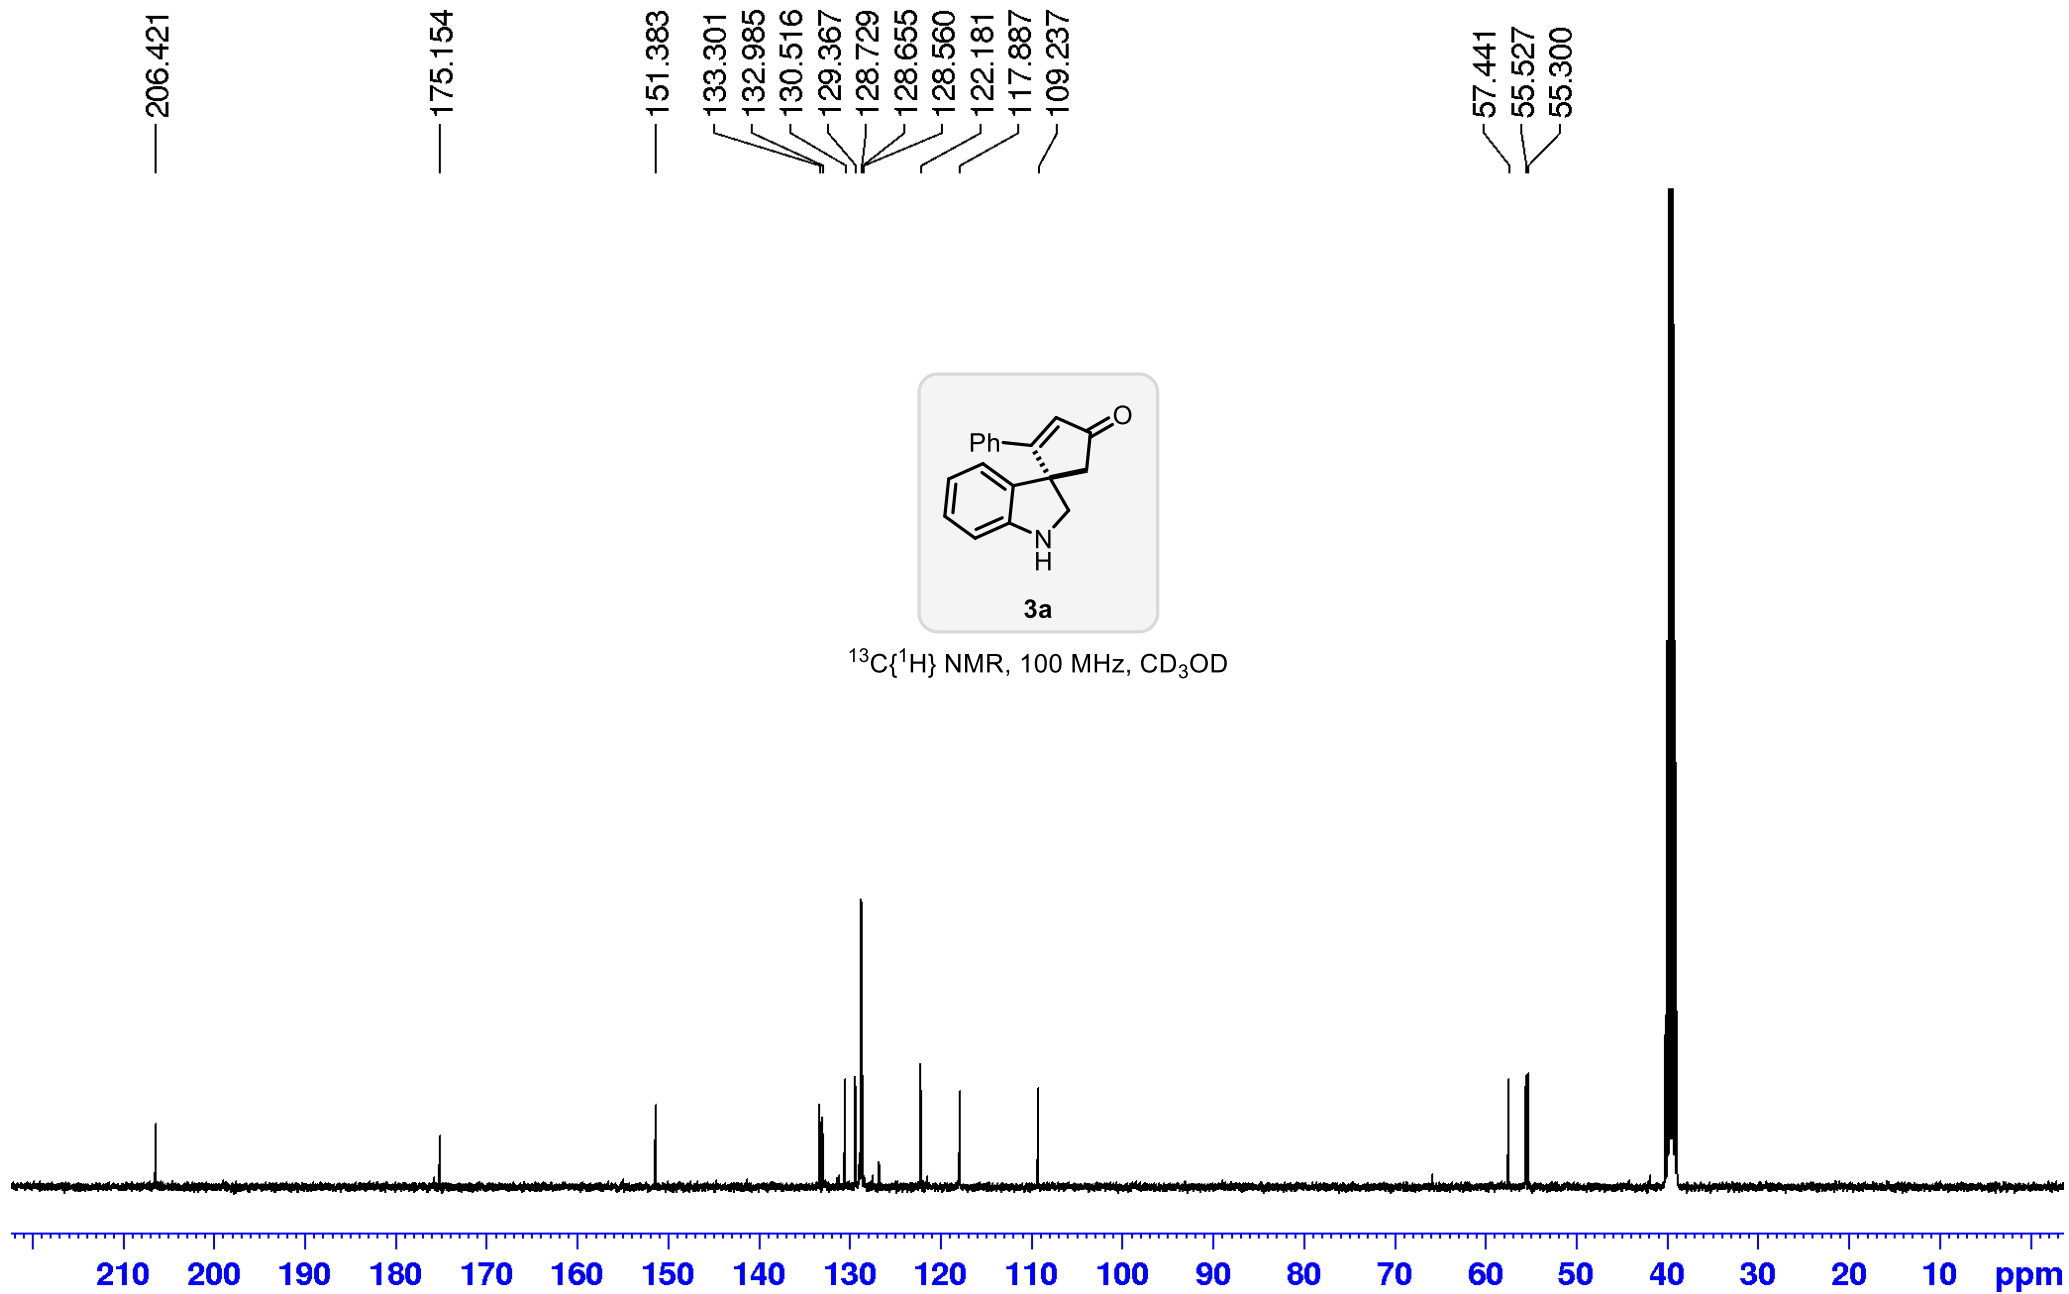

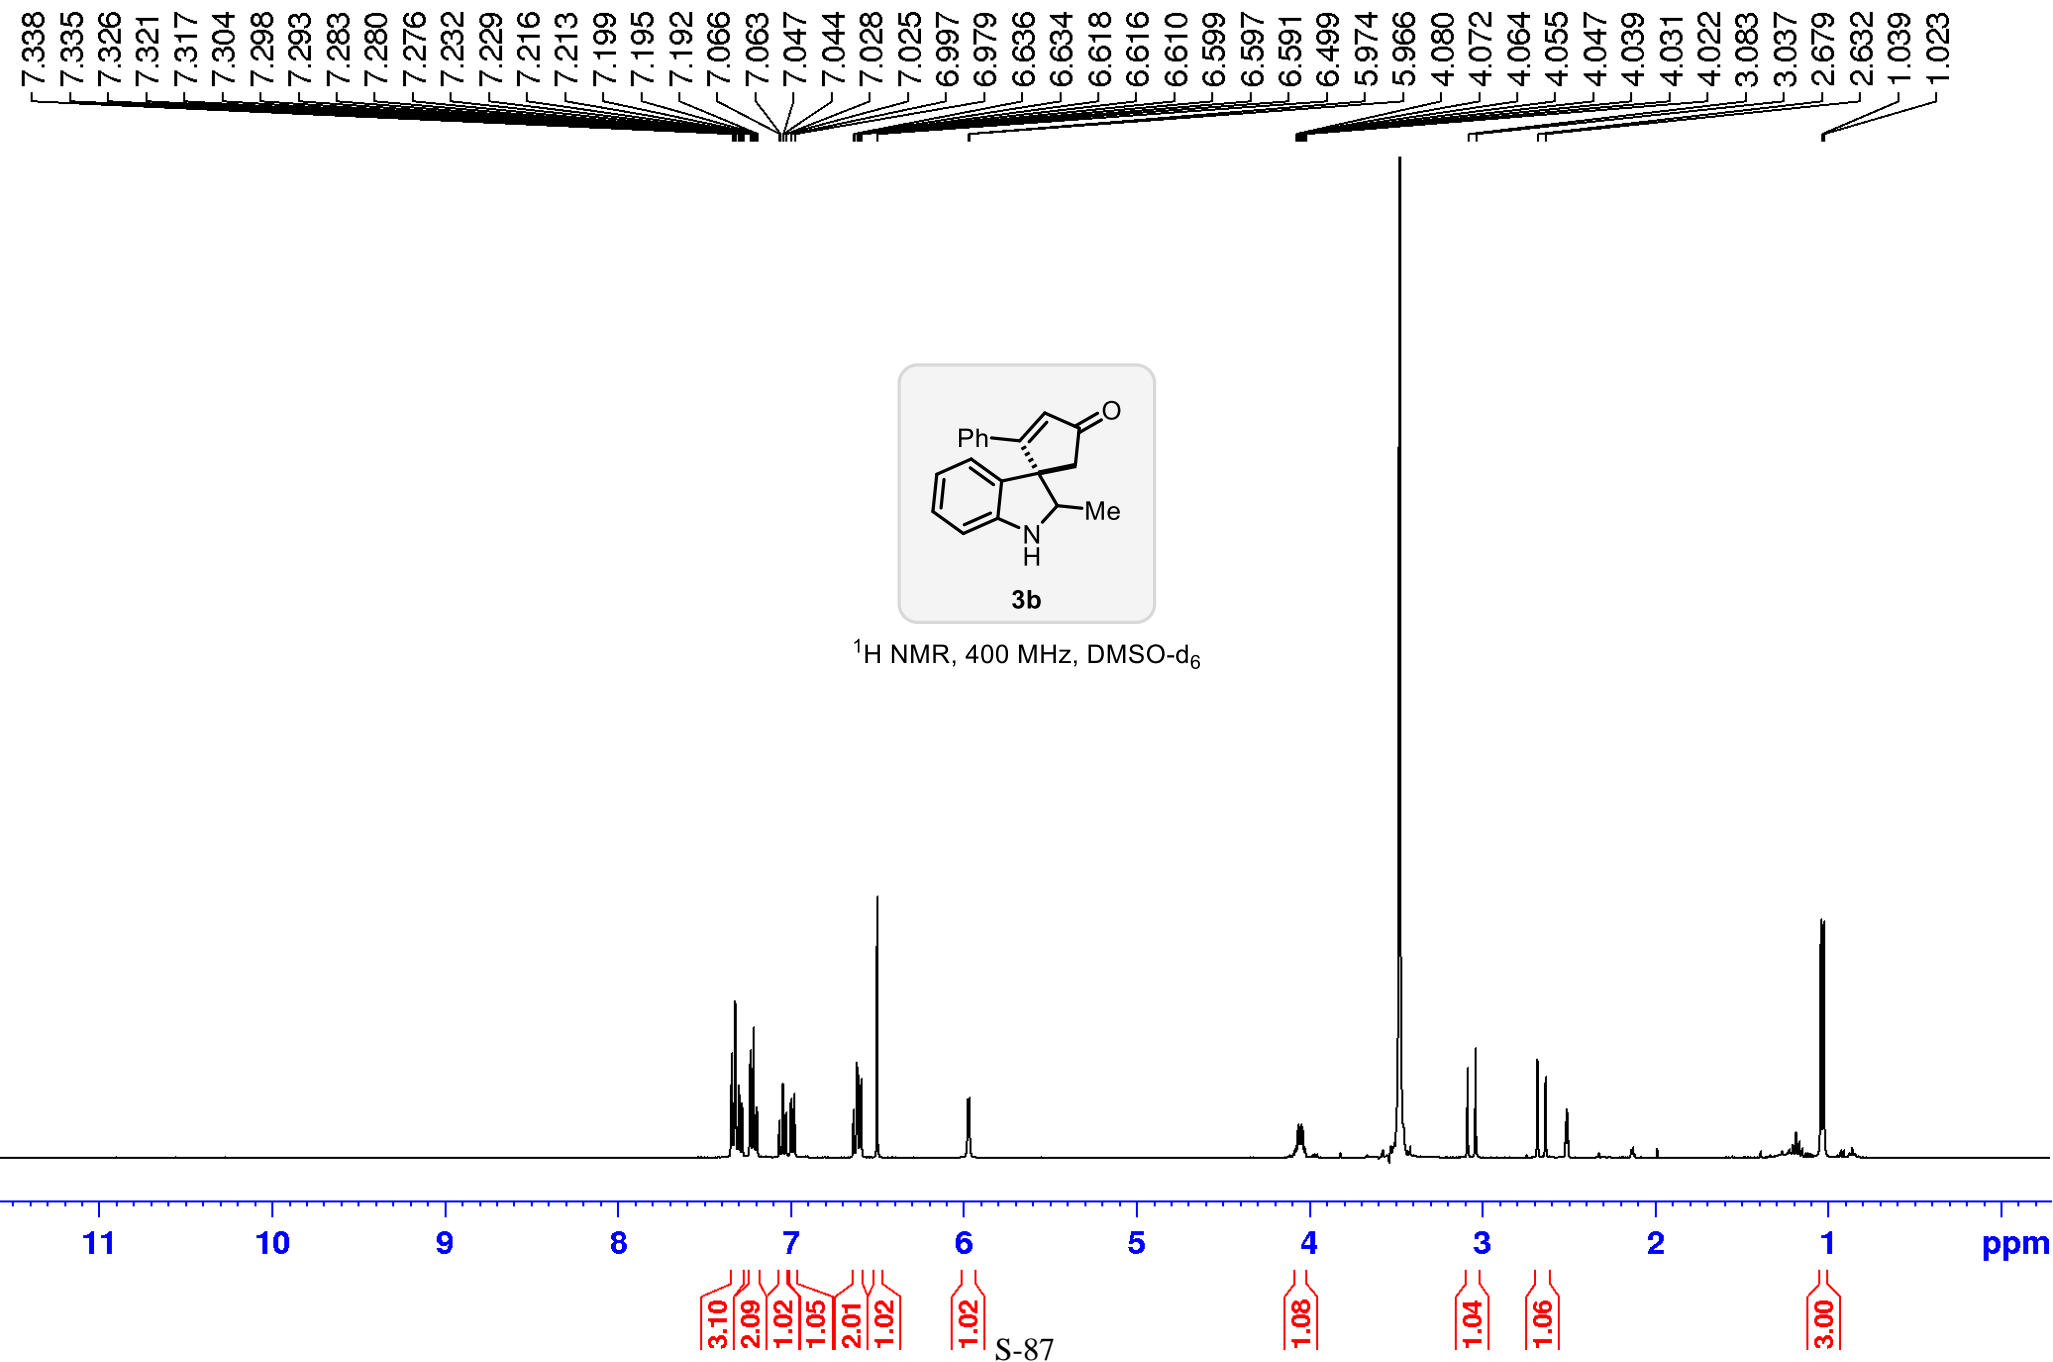

S-87

— 206.232

— 176.757

— 151.879

135.570

132.175

130.934

129.960

128.743

128.321

128.184

123.520

118.262

109.346

— 64.959

— 58.268

— 53.152

— 15.269

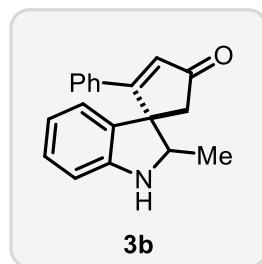

$^{13}\text{C}\{^1\text{H}\}$  NMR, 100 MHz, DMSO- $d_6$

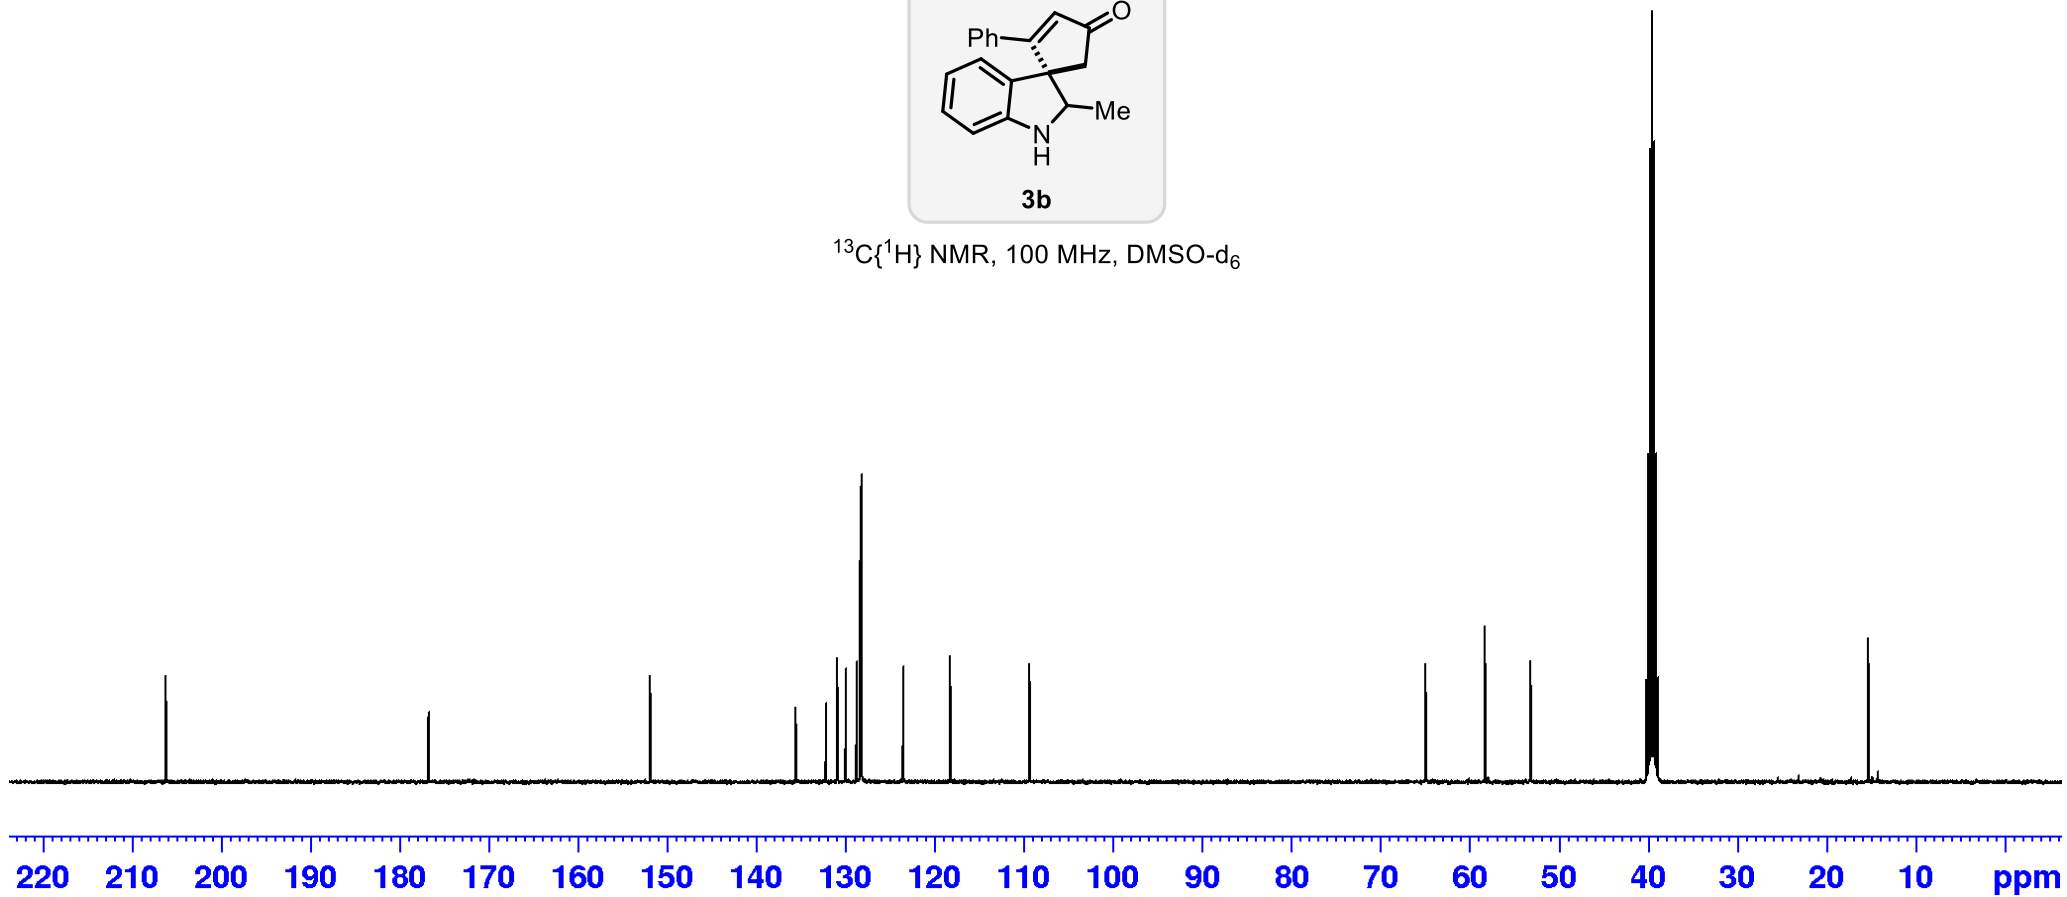



7.336  
7.332  
7.328  
7.320  
7.314  
7.309  
7.301  
7.297  
7.293  
7.274  
7.272  
7.271  
7.267  
7.259  
7.254  
7.249  
7.230  
7.225  
7.212  
7.209  
7.197  
7.192  
7.190  
6.773  
6.767  
6.753  
6.746  
6.673  
6.667  
6.651  
6.408  
4.111  
4.095  
4.078  
4.061  
3.187  
3.139  
2.701  
2.654  
1.137  
1.120

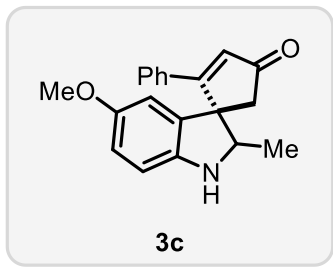

<sup>1</sup>H NMR, 400 MHz, CD<sub>3</sub>OD

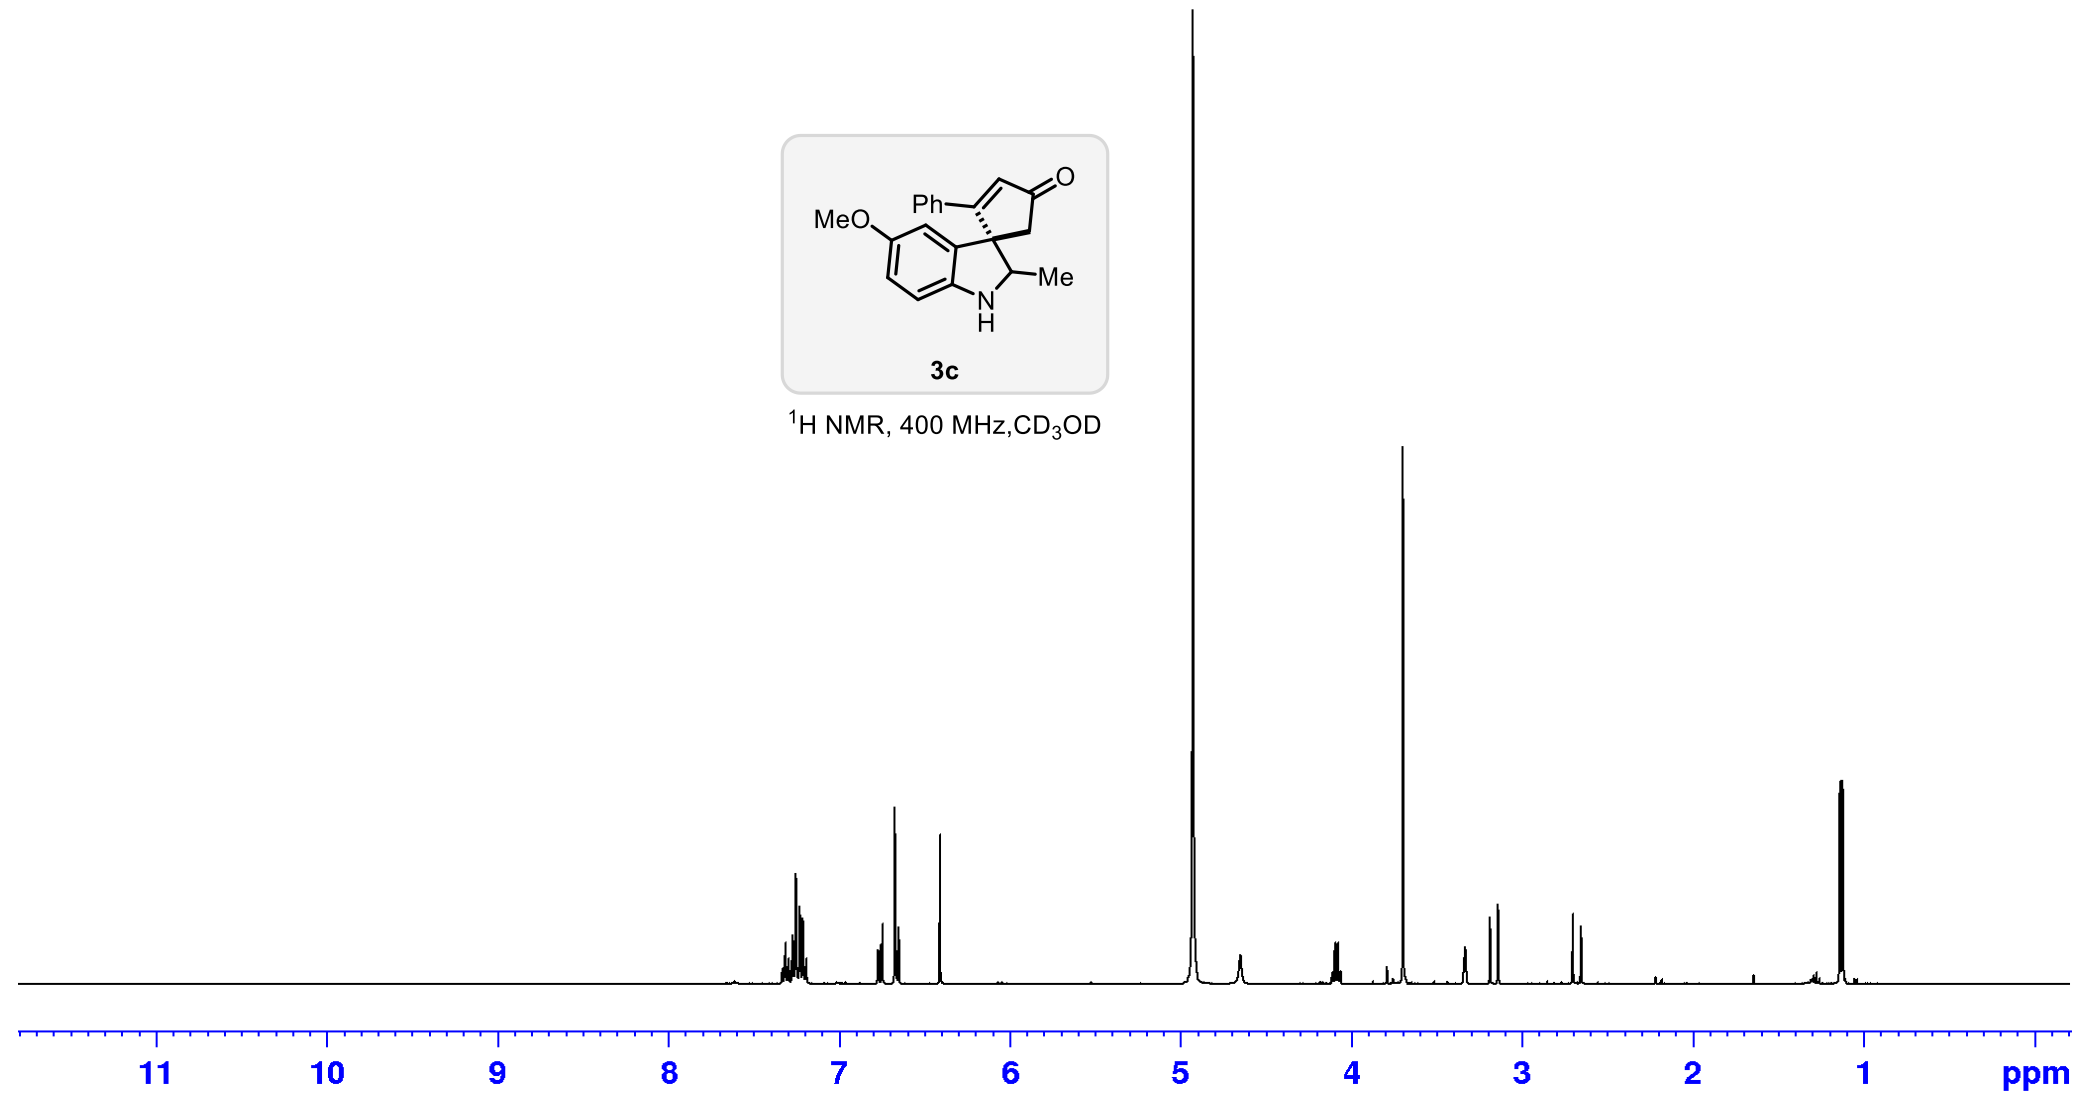

1.04  
4.14  
0.98  
1.96  
0.98  
1.09  
3.03  
1.03  
1.08  
3.00

S-89

— 209.527

— 180.403

— 155.663

— 146.863

— 137.051

— 135.030

— 131.885

— 131.139

— 129.363

— 129.347

— 115.749

— 112.492

— 110.536

— 67.179

— 60.881

— 56.341

— 53.936

— 15.616

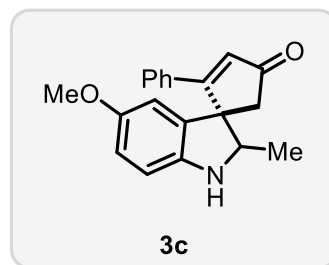

**3c**

$^{13}\text{C}\{^1\text{H}\}$  NMR, 100 MHz,  $\text{CD}_3\text{OD}$

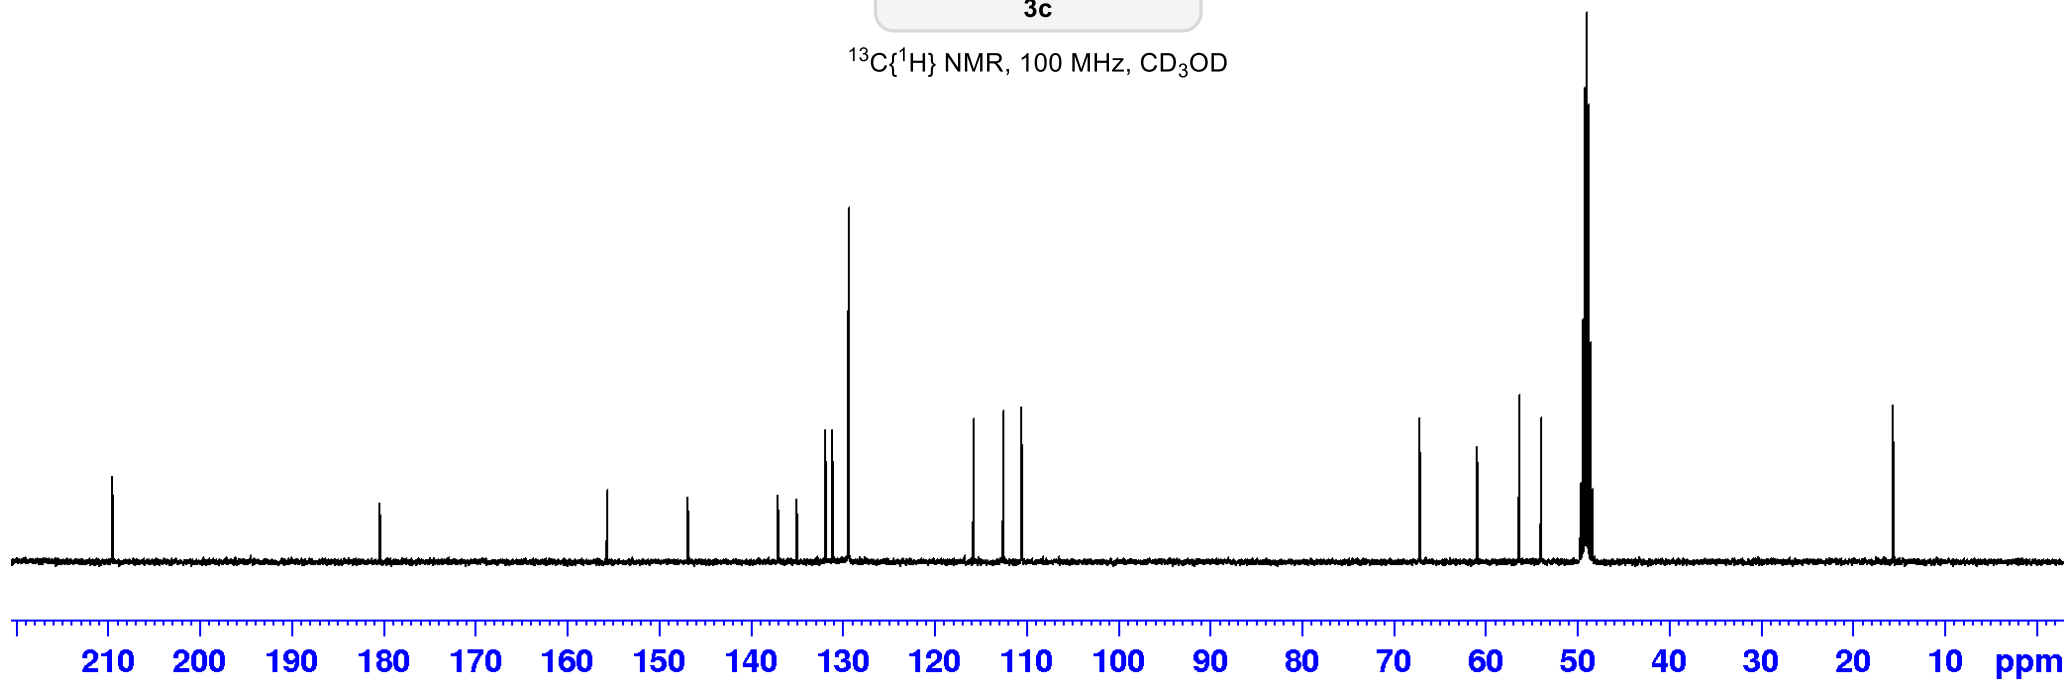

Supplement: d3cc03543c1.pdf [file d3cc03543c1.pdf]
